# Supplementary material for: Dynamics of allosteric regulation of the phospholipase C-γ isozymes upon recruitment to membranes
Source: eLife. 2022 Jun 16;11:e77809. doi: 10.7554/eLife.77809 (PMC9203054; doi:10.7554/eLife.77809)
Supplement: Figure 1—source data 1. [file elife-77809-fig1-data1.xlsx]

## Sheet: raw data- expt 1 (CD)
							3s						3s						3s						30s						30s						30s						300s						300s
State	Start	End	Sequence	Search RT	Charge	Max D	Start RT	End RT	#D	%D	Score	Conf	Start RT	End RT	#D	%D	Score	Conf	Start RT	End RT	#D	%D	Score	Conf	Start RT	End RT	#D	%D	Score	Conf	Start RT	End RT	#D	%D	Score	Conf	Start RT	End RT	#D	%D	Score	Conf	Start RT	End RT	#D	%D	Score	Conf	Start RT
A_CD	26	33	CRSLEVGT	6.68	2	6	6.55	6.93	0.463	11.021	0.8481	Medium	6.55	6.93	0.43	10.248	0.8455	Medium	6.55	6.93	0.449	10.7	0.824	Medium	6.56	6.93	1.089	25.919	0.8392	Medium	6.55	6.93	1.083	25.785	0.8302	Medium	6.55	6.93	1.052	25.056	0.831	Medium	6.55	6.93	2.426	57.768	0.8252	Medium	6.55
A_CD	26	35	CRSLEVGTVM	9.41	2	8	9.3	9.35	0.438	7.829	0.9225	High	9.3	9.35	0.417	7.439	0.921	High	9.3	9.35	0.431	7.69	0.8976	High	9.3	9.35	1.4	24.993	0.9361	High	9.3	9.35	1.449	25.878	0.9346	High	9.3	9.35	1.411	25.2	0.9271	High	9.29	9.35	2.948	52.638	0.9391	High	9.3
A_CD	33	37	TVMTL	10.28	1	3	10.2	10.24	0.083	3.965	0.8432	Medium	10.2	10.24	0.084	4.021	0.8484	Medium	10.2	10.24	0.094	4.456	0.8281	Medium	10.21	10.24	0.048	2.305	0.8519	Medium	10.2	10.24	0.082	3.92	0.8249	Medium	10.21	10.24	0.08	3.786	0.8063	Medium	10.2	10.24	0.026	1.225	0.8472	Medium	10.2
A_CD	37	54	LFYSKKSQRPERKTFQVK	6.62	5	15	6.54	7	0.739	7.035	0.9488	Medium	6.55	7	0.704	6.706	0.9352	Medium	6.54	7	0.752	7.165	0.941	Medium	6.55	7	1.679	15.99	0.9428	High	6.55	7	1.731	16.487	0.9494	High	6.54	6.99	1.71	16.284	0.943	High	6.54	6.99	2.101	20.008	0.9433	High	6.54
A_CD	38	52	FYSKKSQRPERKTFQ	4.22	3	12	4.23	4.68	1.3	15.477	0.946	High	4.23	4.68	1.305	15.531	0.956	High	4.23	4.68	1.306	15.548	0.9481	High	4.23	4.68	2.128	25.332	0.9522	High	4.23	4.68	2.16	25.711	0.9401	High	4.23	4.68	2.148	25.576	0.942	High	4.23	4.68	2.472	29.43	0.9445	High	4.23
A_CD	38	55	FYSKKSQRPERKTFQVKL	6.68	4	15	6.53	7.03	0.738	7.026	0.9406	High	6.53	7.03	0.698	6.647	0.956	High	6.53	7.03	0.728	6.933	0.9596	High	6.53	7.03	1.683	16.033	0.9419	High	6.53	7.03	1.719	16.368	0.9397	High	6.52	7.03	1.712	16.305	0.9435	High	6.52	7.03	2.103	20.026	0.9402	High	6.53
A_CD	53	57	VKLET	5.86	1	3	5.89	5.98	0.801	38.129	0.9182	Medium	5.89	5.98	0.764	36.389	0.884	Medium	5.89	5.98	0.781	37.206	0.9228	Medium	5.89	5.98	1.741	82.916	0.9213	Medium	5.89	5.98	1.784	84.96	0.9025	Medium	5.89	5.98	1.738	82.781	0.9192	Medium	5.88	5.98	1.898	90.396	0.9219	Medium	5.89
A_CD	56	74	ETRQITWSRGADKIEGSID	8.66	4	17	8.61	9.04	2.172	18.254	0.8914	Medium	8.61	9.04	2.175	18.276	0.878	Medium	8.61	9.04	2.216	18.622	0.8785	Medium	8.61	9.04	3.461	29.081	0.9022	Medium	8.61	9.04	3.544	29.781	0.9	Medium	8.61	9.04	3.507	29.47	0.8892	Medium	8.61	9.03	4.934	41.462	0.8862	Medium	8.61
A_CD	58	74	RQITWSRGADKIEGSID	8.44	2	15	8.25	8.71	2.084	19.849	0.9008	High	8.25	8.71	2.039	19.423	0.8992	High	8.25	8.71	2.103	20.031	0.8992	High	8.25	8.71	3.341	31.818	0.9008	High	8.25	8.71	3.429	32.661	0.8688	High	8.25	8.71	3.373	32.123	0.8833	High	8.25	8.71	4.788	45.604	0.8769	High	8.25
A_CD	75	89	IREIKEIRPGKTSRD	4.77	4	12	4.71	5.2	0.574	6.83	0.9495	High	4.71	5.2	0.568	6.763	0.9277	High	4.71	5.2	0.587	6.992	0.941	High	4.71	5.2	1.484	17.669	0.9471	High	4.71	5.2	1.464	17.429	0.9477	High	4.71	5.2	1.467	17.466	0.942	High	4.7	5.2	1.979	23.559	0.9474	High	4.71
A_CD	75	107	IREIKEIRPGKTSRDFDRYQEDPAFRPDQSHCF	8.23	5	28	8.01	8.56	2.52	12.855	0.9069	High	8.01	8.56	2.482	12.662	0.907	High	8.01	8.56	2.543	12.975	0.8996	High	8.02	8.56	4.636	23.652	0.901	High	8.01	8.56	4.68	23.878	0.8952	Medium	8.02	8.56	4.633	23.636	0.8801	High	8.01	8.56	5.747	29.321	0.9001	High	8.01
A_CD	78	89	IKEIRPGKTSRD	3.88	4	9	3.83	4.41	0.607	9.641	0.9564	High	3.83	4.41	0.596	9.454	0.9517	High	3.83	4.41	0.578	9.177	0.9476	High	3.83	4.41	1.581	25.095	0.9562	High	3.83	4.41	1.501	23.828	0.9416	High	3.83	4.41	1.536	24.373	0.9569	High	3.83	4.41	2.1	33.341	0.9602	High	3.83
A_CD	78	90	IKEIRPGKTSRDF	5.82	4	10	5.65	6.08	0.527	7.526	0.9071	Medium	5.65	6.08	0.517	7.38	0.9311	Medium	5.65	6.08	0.514	7.344	0.9323	Medium	5.65	6.09	1.289	18.414	0.877	Medium	5.65	6.08	1.288	18.405	0.9078	Medium	5.65	6.08	1.302	18.594	0.909	Medium	5.64	6.08	2.113	30.18	0.8918	Medium	5.65
A_CD	78	106	IKEIRPGKTSRDFDRYQEDPAFRPDQSHC	7.17	4	24	7.02	7.4	2.813	16.746	0.8721	Medium	7.02	7.4	2.778	16.537	0.863	Medium	7.02	7.4	2.828	16.835	0.8705	Medium	7.03	7.4	5.162	30.728	0.8403	Medium	7.02	7.4	5.273	31.387	0.8391	Medium	7.02	7.4	5.298	31.539	0.8332	Medium	7.02	7.4	6.412	38.168	0.8362	Medium	7.02
A_CD	90	106	FDRYQEDPAFRPDQSHC	7.75	3	13	7.68	8.16	2.535	27.859	0.9484	High	7.68	8.16	2.484	27.301	0.936	High	7.68	8.16	2.552	28.044	0.9448	High	7.68	8.16	4.238	46.577	0.9385	High	7.68	8.16	4.275	46.98	0.9349	High	7.68	8.16	4.264	46.852	0.9408	High	7.67	8.15	4.608	50.641	0.9411	High	7.68
A_CD	94	107	QEDPAFRPDQSHCF	9.22	2	10	9.12	9.33	1.421	20.307	0.8214	Medium	9.12	9.33	1.442	20.605	0.8024	Medium	9.12	9.33	1.391	19.868	0.7554	Medium	9.13	9.34	2.291	32.725	0.7752	Medium	9.12	9.33	2.318	33.118	0.7736	Medium	9.13	9.34	2.395	34.213	0.8057	Medium	9.12	9.33	2.623	37.472	0.8269	Medium	9.12
A_CD	97	106	PAFRPDQSHC	6.15	2	7	6.16	6.24	1.677	34.227	0.851	Medium	6.16	6.24	1.655	33.775	0.8731	Medium	6.16	6.24	1.703	34.752	0.8517	Medium	6.16	6.24	2.17	44.288	0.9079	High	6.16	6.24	2.206	45.014	0.8795	Medium	6.15	6.24	2.224	45.395	0.8841	Medium	6.15	6.24	2.492	50.854	0.8877	Medium	6.16
A_CD	111	115	YGMEF	12	1	3	11.83	11.9	0.133	6.328	0.882	Medium	11.83	11.9	0.133	6.344	0.906	Medium	11.83	11.9	0.136	6.469	0.8681	Medium	11.84	11.91	0.495	23.575	0.8864	Medium	11.83	11.9	0.472	22.469	0.8992	Medium	11.84	11.91	0.479	22.8	0.8948	Medium	11.83	11.9	0.515	24.517	0.9061	Medium	11.83
A_CD	115	122	FRLKTLSL	10.23	2	6	10.21	10.56	0.037	0.874	0.9311	High	10.21	10.56	0.032	0.756	0.9334	High	10.21	10.56	0.037	0.886	0.9323	High	10.22	10.56	0.108	2.578	0.9305	High	10.21	10.56	0.089	2.111	0.9412	Medium	10.22	10.56	0.112	2.664	0.9264	Medium	10.21	10.56	0.477	11.363	0.907	Medium	10.21
A_CD	116	122	RLKTLSL	8.5	2	5	8.35	8.75	0.024	0.686	0.9576	High	8.35	8.75	0.023	0.648	0.9594	High	8.35	8.75	0.028	0.81	0.9612	High	8.35	8.76	0.023	0.656	0.9448	High	8.35	8.75	0.12	3.422	0.8479	Medium	8.35	8.76	0.063	1.792	0.9145	High	8.35	8.75	0.062	1.776	0.957	High	8.35
A_CD	123	128	QATSED	3.41	1	4	3.38	3.56	1.085	38.742	0.8168	Medium	3.38	3.56	1.142	40.777	0.8469	Medium	3.38	3.56	1.171	41.836	0.8519	Medium	3.38	3.56	1.606	57.359	0.8371	Medium	3.38	3.56	1.584	56.56	0.7719	Medium	3.37	3.56	1.637	58.447	0.8111	Medium	3.38	3.56	1.906	68.077	0.8455	Medium	3.38
A_CD	132	140	MWIKGLTWL	14.05	2	7	13.95	14.28	0	0.001	0.9384	High	13.95	14.28	0.015	0.297	0.921	High	13.95	14.28	0.012	0.238	0.9088	High	13.95	14.28	0.018	0.372	0.9332	High	13.95	14.28	0.014	0.281	0.8797	Medium	13.95	14.28	0.03	0.62	0.9044	Medium	13.96	14.28	0.028	0.564	0.9301	High	13.95
A_CD	133	140	WIKGLTWL	13.86	1	6	13.74	14.07	0.02	0.483	0.9209	High	13.74	14.07	0.018	0.434	0.9368	High	13.75	14.07	0.009	0.222	0.9357	High	13.74	14.07	0.025	0.594	0.9243	High	13.74	14.07	0.026	0.611	0.916	High	13.74	14.07	0.013	0.308	0.9338	High	13.75	14.07	0.05	1.201	0.9166	High	13.74
A_CD	141	145	MEDTL	8.66	1	3	8.55	8.84	0.032	1.527	0.8958	Medium	8.55	8.84	0.031	1.463	0.8977	Medium	8.55	8.84	0.031	1.467	0.9021	Medium	8.55	8.84	0.042	2.003	0.8867	Medium	8.55	8.84	0.051	2.451	0.8804	Medium	8.55	8.84	0.054	2.567	0.8859	Medium	8.55	8.83	0.162	7.726	0.8851	Medium	8.55
A_CD	141	146	MEDTLQ	7.25	1	4	7.18	7.47	0.148	5.303	0.7078	Medium	7.18	7.47	0.106	3.801	0.7121	Medium	7.18	7.47	0.138	4.933	0.7049	Medium	7.19	7.47	0.097	3.456	0.7556	Medium	7.18	7.47	0.137	4.881	0.7257	Medium	7.19	7.47	0.16	5.711	0.6836	Medium	7.18	7.46	0.463	16.523	0.7595	Medium	7.18
A_CD	141	156	MEDTLQAATPLQIERW	12.52	3	13	12.39	12.53	0.101	1.115	0.9189	High	12.39	12.53	0.088	0.964	0.8913	High	12.39	12.53	0.101	1.114	0.9106	High	12.39	12.54	0.57	6.261	0.9209	High	12.39	12.53	0.604	6.636	0.9222	High	12.39	12.54	0.599	6.585	0.9161	High	12.39	12.53	1.282	14.091	0.9243	High	12.39
A_CD	141	161	MEDTLQAATPLQIERWLRKQF	13.19	4	18	13.04	13.69	0.099	0.789	0.9433	High	13.03	13.69	0.073	0.582	0.9463	High	13.04	13.69	0.091	0.725	0.9476	High	13.04	13.69	0.572	4.536	0.9427	High	13.03	13.69	0.622	4.937	0.9285	High	13.04	13.69	0.599	4.756	0.9414	High	13.04	13.7	1.408	11.175	0.9433	High	13.03
A_CD	141	162	MEDTLQAATPLQIERWLRKQFY	13.4	4	19	13.41	13.62	0.1	0.752	0.9373	High	13.4	13.61	0.076	0.569	0.9385	High	13.41	13.62	0.088	0.663	0.9323	High	13.41	13.62	0.565	4.248	0.9208	High	13.4	13.61	0.647	4.865	0.9042	High	13.41	13.62	0.637	4.788	0.9175	High	13.41	13.62	1.49	11.201	0.9307	High	13.4
A_CD	141	181	MEDTLQAATPLQIERWLRKQFYSVDRNREDRISAKDLKNML	12.24	5	38	12.23	12.57	1.149	4.318	0.9393	High	12.24	12.56	0.984	3.7	0.9348	High	12.23	12.56	1.112	4.18	0.9364	High	12.24	12.57	3.297	12.394	0.9336	High	12.24	12.56	3.435	12.915	0.9244	High	12.24	12.57	3.333	12.531	0.8902	High	12.24	12.56	5.444	20.467	0.9345	High	12.24
A_CD	143	161	DTLQAATPLQIERWLRKQF	13.2	4	16	13.01	13.47	0.138	1.235	0.9071	High	13	13.46	0.07	0.621	0.9049	High	13.01	13.47	0.114	1.018	0.892	High	13.01	13.47	0.638	5.699	0.8993	High	13	13.46	0.713	6.362	0.8422	Medium	13.01	13.47	0.69	6.157	0.8763	Medium	13.01	13.47	1.43	12.764	0.9143	High	13
A_CD	146	161	QAATPLQIERWLRKQF	12.25	3	13	12.13	12.62	0.079	0.865	0.928	High	12.14	12.61	0.067	0.739	0.9307	High	12.13	12.62	0.078	0.855	0.9241	High	12.14	12.62	0.46	5.051	0.9043	High	12.13	12.61	0.483	5.31	0.9018	Medium	12.14	12.62	0.444	4.876	0.9192	High	12.13	12.62	0.859	9.441	0.8941	Medium	12.14
A_CD	146	162	QAATPLQIERWLRKQFY	12.52	4	14	12.64	12.71	0.049	0.504	0.9503	High	12.63	12.71	0.079	0.805	0.9592	High	12.64	12.71	0.075	0.763	0.9577	High	12.64	12.71	0.449	4.584	0.9393	High	12.63	12.71	0.476	4.855	0.9231	High	12.64	12.71	0.47	4.793	0.9329	High	12.64	12.7	0.878	8.957	0.9486	High	12.63
A_CD	162	181	YSVDRNREDRISAKDLKNML	9.03	3	18	8.88	9.37	1.192	9.464	0.9451	High	8.88	9.37	1.142	9.066	0.9427	High	8.88	9.37	1.187	9.422	0.9399	High	8.88	9.38	2.67	21.191	0.9347	High	8.88	9.37	2.733	21.69	0.9195	High	8.88	9.38	2.689	21.341	0.9277	High	8.88	9.37	3.906	30.999	0.9264	High	8.88
A_CD	162	184	YSVDRNREDRISAKDLKNMLSQV	10.24	4	21	10.2	10.28	1.099	7.474	0.8845	High	10.2	10.28	1.015	6.904	0.8977	High	10.2	10.28	1.061	7.22	0.8765	Medium	10.2	10.29	2.482	16.886	0.919	High	10.2	10.28	2.605	17.721	0.8987	High	10.2	10.29	2.537	17.259	0.8973	High	10.19	10.28	3.881	26.4	0.9101	High	10.2
A_CD	182	193	SQVNYRVPNMRF	9.9	3	9	9.75	10.26	2.069	32.836	0.9158	High	9.75	10.26	2.009	31.892	0.9115	High	9.75	10.26	2.065	32.785	0.916	High	9.76	10.27	3.057	48.524	0.9117	High	9.75	10.26	3.09	49.05	0.9165	High	9.76	10.27	3.046	48.352	0.9165	High	9.75	10.26	3.415	54.205	0.9112	High	9.75
A_CD	185	193	NYRVPNMRF	9.68	3	6	9.53	10.1	2.015	47.982	0.9454	Medium	9.53	10.1	1.965	46.776	0.9491	Medium	9.53	10.09	2.016	48.001	0.9486	Medium	9.54	10.1	2.999	71.398	0.9351	Medium	9.53	10.1	3.033	72.221	0.9308	Medium	9.54	10.1	3	71.425	0.9378	Medium	9.53	10.09	3.128	74.486	0.9391	Medium	9.53
A_CD	186	193	YRVPNMRF	9.68	3	5	9.52	9.98	1.98	56.575	0.9529	High	9.52	9.98	1.939	55.406	0.9566	High	9.52	9.98	1.988	56.811	0.9597	High	9.52	9.98	2.93	83.723	0.9428	High	9.52	9.98	2.953	84.382	0.9432	High	9.52	9.98	2.944	84.114	0.905	Medium	9.51	9.98	3.034	86.689	0.9528	High	9.52
A_CD	192	201	RFLRERLTDL	8.9	3	8	8.93	9.01	1.43	25.543	0.9284	Medium	8.93	9.01	1.351	24.124	0.9327	Medium	8.93	9.01	1.446	25.828	0.9258	Medium	8.93	9.02	3.517	62.796	0.9204	Medium	8.93	9.01	3.605	64.38	0.8993	Medium	8.93	9.02	3.614	64.529	0.915	Medium	8.93	9.01	3.691	65.905	0.9212	Medium	8.93
A_CD	194	201	LRERLTDL	8.31	2	6	8.21	8.73	1.268	30.191	0.8129	Medium	8.21	8.73	1.231	29.313	0.8234	Medium	8.21	8.73	1.259	29.978	0.8151	Medium	8.21	8.73	2.787	66.367	0.8042	Medium	8.21	8.73	2.867	68.251	0.8064	Medium	8.21	8.73	2.837	67.557	0.8205	Medium	8.2	8.72	2.886	68.726	0.8125	Medium	8.21
A_CD	202	213	EQRSGDITYGQF	9.68	2	10	9.54	10.07	1.198	17.112	0.9072	High	9.54	10.07	1.162	16.596	0.9034	High	9.54	10.07	1.21	17.286	0.9085	High	9.55	10.08	1.902	27.175	0.9011	High	9.54	10.07	1.939	27.698	0.9012	High	9.55	10.08	1.912	27.308	0.908	High	9.54	10.07	2.991	42.732	0.9119	High	9.54
A_CD	217	221	YRSLM	8.39	1	3	8.36	8.65	0.042	1.994	0.8247	Medium	8.36	8.65	0.046	2.181	0.8341	Medium	8.36	8.65	0.039	1.88	0.8215	Medium	8.36	8.66	0.048	2.283	0.8486	Medium	8.36	8.65	0.041	1.934	0.8257	Medium	8.36	8.66	0.058	2.785	0.8389	Medium	8.35	8.65	0.067	3.212	0.8569	Medium	8.36
A_CD	221	235	MYSAQKTMDLPFLET	12.73	2	12	12.8	12.87	1.317	15.682	0.8318	Medium	12.79	12.87	1.372	16.337	0.8298	Medium	12.79	12.87	1.371	16.317	0.8333	Medium	12.8	12.87	3.111	37.037	0.7838	Medium	12.79	12.87	3.238	38.552	0.7908	Medium	12.8	12.87	3.075	36.605	0.7896	Medium	12.79	12.87	4.868	57.948	0.8223	Medium	12.79
A_CD	222	233	YSAQKTMDLPFL	13.14	2	9	12.89	13.5	0.622	9.87	0.9333	High	12.88	13.5	0.612	9.71	0.9446	High	12.89	13.5	0.65	10.322	0.9438	High	12.89	13.5	1.945	30.88	0.9308	High	12.88	13.49	1.979	31.41	0.9065	High	12.89	13.5	1.928	30.599	0.9363	High	12.89	13.5	3.49	55.389	0.9268	High	12.88
A_CD	222	235	YSAQKTMDLPFLET	12.47	2	11	11.93	13.01	1.323	17.176	0.9173	High	11.93	13.01	1.29	16.75	0.9127	High	11.93	13.02	1.316	17.094	0.9176	High	11.94	13.01	3.075	39.934	0.9169	High	11.93	13.01	3.109	40.373	0.9288	High	11.94	13.01	3.041	39.49	0.9235	High	11.93	13.02	4.581	59.49	0.9197	High	11.93
A_CD	236	246	NTLRTGERPEL	7.21	3	8	7.04	7.55	3.381	60.373	0.9438	High	7.04	7.55	3.344	59.714	0.9504	High	7.04	7.55	3.387	60.48	0.9491	High	7.04	7.56	4.371	78.056	0.9412	High	7.04	7.55	4.422	78.968	0.9443	High	7.04	7.56	4.393	78.453	0.9462	High	7.04	7.55	4.391	78.41	0.9412	High	7.04
A_CD	247	251	CQVSL	9.14	1	3	8.91	9.06	0.106	5.051	0.7419	Medium	8.91	9.06	0.056	2.666	0.7662	Medium	8.91	9.06	0.044	2.111	0.7386	Medium	8.92	9.07	0.052	2.495	0.7715	Medium	8.91	9.06	0.047	2.236	0.753	Medium	8.92	9.07	0.05	2.404	0.7553	Medium	8.91	9.06	0.137	6.54	0.7652	Medium	8.91
A_CD	247	253	CQVSLSE	7.8	1	5	7.62	7.9	0.223	6.363	0.8638	Medium	7.62	7.9	0.204	5.84	0.8744	Medium	7.62	7.9	0.212	6.043	0.8624	Medium	7.62	7.9	0.692	19.757	0.8957	High	7.62	7.9	0.702	20.065	0.8434	Medium	7.62	7.9	0.692	19.776	0.871	Medium	7.62	7.89	1.045	29.869	0.9005	Medium	7.62
A_CD	249	254	VSLSEF	11.41	1	4	11.24	11.53	0.176	6.283	0.8672	Medium	11.25	11.53	0.181	6.465	0.8874	Medium	11.24	11.53	0.183	6.525	0.8718	Medium	11.25	11.54	0.594	21.208	0.881	Medium	11.25	11.53	0.572	20.439	0.8857	Medium	11.25	11.54	0.577	20.597	0.8769	Medium	11.24	11.53	0.826	29.51	0.8876	Medium	11.25
A_CD	254	258	FQQFL	11.89	1	3	11.76	12.05	0.017	0.817	0.863	Medium	11.76	12.05	0.033	1.581	0.866	Medium	11.76	12.05	0.048	2.295	0.8719	Medium	11.76	12.06	0.022	1.033	0.8639	Medium	11.76	12.05	0.032	1.524	0.8517	Medium	11.76	12.06	0.038	1.828	0.871	Medium	11.76	12.05	0.021	0.983	0.8869	Medium	11.76
A_CD	259	265	LEYQGEL	9.84	1	5	9.7	10.09	0.148	4.224	0.922	High	9.7	10.09	0.139	3.974	0.9257	High	9.7	10.09	0.176	5.038	0.9237	High	9.71	10.09	0.684	19.529	0.9249	High	9.7	10.09	0.717	20.484	0.9197	High	9.71	10.09	0.719	20.546	0.8817	Medium	9.7	10.08	1.164	33.257	0.9183	High	9.7
A_CD	266	271	WAVDRL	10.39	1	4	10.23	10.55	0.591	21.105	0.9058	Medium	10.23	10.55	0.582	20.768	0.8979	Medium	10.23	10.55	0.619	22.113	0.8774	Medium	10.23	10.55	1.162	41.51	0.8636	Medium	10.23	10.55	1.138	40.633	0.8529	Medium	10.23	10.55	1.128	40.275	0.8683	Medium	10.23	10.55	1.26	44.989	0.8612	Medium	10.23
A_CD	276	280	FMLSF	14.12	1	3	13.95	14.32	0.03	1.408	0.9109	High	13.94	14.31	0.024	1.149	0.9051	High	13.95	14.32	0.026	1.247	0.9093	High	13.95	14.32	0.026	1.225	0.9072	High	13.94	14.32	0.041	1.952	0.9117	High	13.95	14.32	0.047	2.232	0.91	High	13.95	14.32	0.08	3.792	0.9096	High	13.94
A_CD	281	287	LRDPLRE	7.17	1	4	6.95	7.27	0.086	3.082	0.9255	Medium	6.95	7.27	0.102	3.639	0.8745	Medium	6.95	7.27	0.08	2.86	0.9114	Medium	6.95	7.27	0.465	16.623	0.9356	Medium	6.95	7.27	0.493	17.611	0.9128	Medium	6.94	7.27	0.461	16.477	0.9267	Medium	6.94	7.26	1.314	46.94	0.9126	Medium	6.95
A_CD	281	293	LRDPLREIEEPYF	11.83	3	9	11.66	12.24	0.559	8.874	0.96	High	11.66	12.24	0.503	7.979	0.9436	High	11.66	12.24	0.531	8.436	0.9587	High	11.66	12.25	1.646	26.134	0.9511	High	11.66	12.24	1.688	26.789	0.96	High	11.66	12.25	1.699	26.974	0.9272	Medium	11.66	12.25	2.486	39.456	0.9555	High	11.66
A_CD	288	293	IEEPYF	11.78	1	3	11.79	11.87	0.195	9.281	0.9142	Medium	11.79	11.87	0.19	9.033	0.9053	Medium	11.79	11.87	0.187	8.881	0.9125	Medium	11.8	11.87	0.391	18.603	0.8994	Medium	11.79	11.87	0.364	17.345	0.885	Medium	11.8	11.87	0.385	18.335	0.8858	Medium	11.79	11.87	0.361	17.183	0.9018	Medium	11.79
A_CD	294	298	FLDEL	11.89	1	3	11.71	12.02	0.022	1.042	0.8883	High	11.72	12.02	0.006	0.3	0.8905	High	11.71	12.02	0.016	0.766	0.8919	Medium	11.72	12.02	0.06	2.855	0.8975	High	11.72	12.02	0.08	3.822	0.8923	Medium	11.72	12.02	0.063	2.984	0.9055	Medium	11.71	12.02	0.141	6.721	0.9001	High	11.72
A_CD	298	302	LVTFL	13.19	1	3	12.97	13.48	0.022	1.034	0.9265	High	12.97	13.47	0.011	0.532	0.93	High	12.97	13.48	0.006	0.288	0.939	High	12.97	13.48	0.012	0.567	0.9321	High	12.97	13.47	0.012	0.553	0.9289	Medium	12.97	13.48	0.011	0.508	0.9285	High	12.97	13.48	0.009	0.409	0.929	High	12.97
A_CD	303	310	FSKENSVW	9.79	2	6	9.66	9.86	0.042	1.001	0.9026	Medium	9.66	9.86	0.066	1.573	0.9067	Medium	9.66	9.86	0.061	1.448	0.9058	Medium	9.66	9.87	0.094	2.248	0.8881	Medium	9.66	9.86	0.069	1.649	0.8817	Medium	9.66	9.87	0.061	1.455	0.8942	Medium	9.66	9.86	0.138	3.282	0.8956	Medium	9.66
A_CD	303	314	FSKENSVWNSQL	10.56	2	10	10.33	10.82	0.108	1.537	0.8625	High	10.33	10.82	0.123	1.751	0.8589	Medium	10.33	10.82	0.139	1.982	0.8594	Medium	10.34	10.82	0.894	12.778	0.8785	High	10.33	10.82	0.884	12.627	0.8777	High	10.34	10.82	0.872	12.454	0.8718	High	10.33	10.82	1.964	28.056	0.8475	High	10.33
A_CD	315	329	DAVCPETMNNPLSHY	10.56	2	11	10.06	11.04	0.7	9.089	0.7889	Medium	10.06	11.04	0.687	8.919	0.7892	Medium	10.06	11.04	0.695	9.024	0.7884	Medium	10.07	11.05	1.757	22.822	0.7378	Medium	10.06	11.04	1.782	23.138	0.7468	Medium	10.07	11.05	1.774	23.04	0.7475	Medium	10.06	11.04	2.63	34.161	0.7098	Medium	10.06
A_CD	319	329	PETMNNPLSHY	9.73	2	8	9.26	9.96	0.084	1.492	0.9164	High	9.26	9.96	0.068	1.221	0.9183	High	9.26	9.96	0.08	1.428	0.9217	High	9.26	9.97	0.275	4.907	0.9168	High	9.26	9.96	0.281	5.01	0.9209	High	9.26	9.97	0.276	4.927	0.9154	High	9.25	9.96	0.912	16.283	0.9202	High	9.26
A_CD	330	337	WISSSANT	7.66	1	6	7.53	8.04	0.065	1.542	0.9126	High	7.54	8.04	0.065	1.549	0.9211	High	7.53	8.04	0.056	1.322	0.9205	High	7.54	8.04	0.073	1.735	0.9195	High	7.54	8.04	0.078	1.86	0.9191	High	7.54	8.04	0.092	2.187	0.9063	High	7.53	8.04	0.156	3.712	0.9174	High	7.54
A_CD	330	339	WISSSANTYL	11.57	1	8	11.61	11.85	0.173	3.08	0.8785	Medium	11.61	11.85	0.166	2.972	0.9118	Medium	11.61	11.85	0.196	3.497	0.9046	Medium	11.61	11.86	0.29	5.183	0.8948	Medium	11.61	11.85	0.299	5.339	0.8644	Medium	11.61	11.86	0.291	5.196	0.8727	Medium	11.6	11.85	0.301	5.369	0.8685	Medium	11.61
A_CD	344	350	FSSESSL	8.36	1	5	8.34	8.45	0.464	13.262	0.8451	Medium	8.34	8.45	0.458	13.083	0.8696	Medium	8.34	8.45	0.492	14.063	0.8615	Medium	8.34	8.45	1.41	40.275	0.8453	Medium	8.34	8.45	1.355	38.713	0.8049	Medium	8.34	8.45	1.482	42.356	0.8166	Medium	8.34	8.45	2.259	64.542	0.8631	Medium	8.34
A_CD	345	350	SSESSL	6.35	1	4	6.27	6.35	0.286	10.219	0.8945	High	6.27	6.35	0.277	9.892	0.9076	High	6.27	6.35	0.284	10.14	0.8972	High	6.27	6.35	1.209	43.167	0.8937	High	6.27	6.35	1.199	42.836	0.8805	High	6.26	6.35	1.17	41.769	0.8695	Medium	6.26	6.35	1.991	71.11	0.9002	High	6.27
A_CD	345	352	SSESSLEA	6.53	1	6	6.59	6.7	0.467	11.122	0.8471	Medium	6.6	6.7	0.45	10.721	0.8579	Medium	6.59	6.7	0.488	11.612	0.819	Medium	6.6	6.7	1.714	40.798	0.7934	Medium	6.6	6.7	1.7	40.481	0.7909	Medium	6.59	6.69	1.708	40.671	0.7775	Medium	6.59	6.69	2.437	58.024	0.7841	Medium	6.6
A_CD	357	363	LRMGCRC	6.3	2	5	6.12	6.44	0.041	1.16	0.9316	Medium	6.12	6.44	0.046	1.314	0.9285	Medium	6.12	6.44	0.043	1.23	0.9354	Medium	6.12	6.44	0.041	1.158	0.9377	Medium	6.12	6.44	0.033	0.945	0.9384	Medium	6.11	6.43	0.048	1.379	0.9446	Medium	6.11	6.43	0.063	1.802	0.931	Medium	6.12
A_CD	367	375	DCWDGPDGM	11.64	1	6	11.51	11.69	0.505	12.019	0.8857	Medium	11.51	11.69	0.508	12.094	0.8111	Medium	11.51	11.69	0.487	11.591	0.8709	Medium	11.52	11.7	0.735	17.504	0.8785	Medium	11.51	11.69	0.693	16.501	0.8837	Medium	11.52	11.7	0.731	17.395	0.8705	Medium	11.51	11.69	1.017	24.214	0.8874	Medium	11.51
A_CD	367	386	DCWDGPDGMPVIYHGHTLTT	10.88	3	16	10.69	11.43	0.92	8.211	0.9075	High	10.69	11.43	0.894	7.981	0.9273	High	10.69	11.43	0.962	8.589	0.9306	High	10.7	11.44	2.43	21.698	0.9285	High	10.69	11.43	2.475	22.097	0.9407	High	10.7	11.44	2.431	21.706	0.9334	High	10.69	11.43	2.887	25.774	0.9325	High	10.69
A_CD	367	394	DCWDGPDGMPVIYHGHTLTTKIKFSDVL	11.61	4	24	11.6	11.69	1.071	6.373	0.9222	High	11.6	11.69	0.952	5.67	0.9339	High	11.6	11.69	1.034	6.157	0.907	High	11.6	11.7	2.801	16.675	0.9073	High	11.6	11.69	2.922	17.394	0.9026	High	11.6	11.7	2.935	17.468	0.9127	High	11.6	11.69	3.707	22.064	0.9157	High	11.6
A_CD	367	396	DCWDGPDGMPVIYHGHTLTTKIKFSDVLHT	10.9	5	26	10.82	11.17	1.133	6.223	0.8886	High	10.82	11.17	0.987	5.421	0.8915	High	10.82	11.17	1.081	5.939	0.9016	High	10.82	11.18	2.565	14.094	0.8851	Medium	10.82	11.17	2.829	15.543	0.8772	Medium	10.82	11.18	2.779	15.267	0.8722	Medium	10.82	11.17	3.489	19.172	0.8751	Medium	10.82
A_CD	376	386	PVIYHGHTLTT	7.16	3	9	7.21	7.36	0.552	8.761	0.9142	Medium	7.21	7.36	0.528	8.386	0.9145	Medium	7.21	7.36	0.562	8.92	0.9027	Medium	7.21	7.36	2.008	31.869	0.8802	Medium	7.21	7.36	2.07	32.857	0.8742	Medium	7.21	7.36	2.073	32.91	0.89	Medium	7.2	7.35	2.212	35.106	0.8715	Medium	7.21
A_CD	387	394	KIKFSDVL	9.87	1	6	9.76	10.07	0.329	7.826	0.9231	High	9.76	10.07	0.336	8.008	0.9257	High	9.76	10.07	0.359	8.542	0.8997	Medium	9.76	10.08	0.723	17.211	0.9271	Medium	9.76	10.07	0.735	17.502	0.9115	Medium	9.76	10.08	0.762	18.153	0.9073	Medium	9.76	10.07	1.093	26.026	0.9232	Medium	9.76
A_CD	387	399	KIKFSDVLHTIKE	9.3	3	11	9.2	9.3	0.266	3.452	0.9498	Medium	9.2	9.3	0.248	3.224	0.959	Medium	9.2	9.3	0.291	3.779	0.9334	Medium	9.2	9.3	0.496	6.437	0.9588	High	9.2	9.3	0.555	7.203	0.9453	High	9.2	9.3	0.533	6.919	0.9616	High	9.19	9.29	0.887	11.515	0.9563	High	9.2
A_CD	391	399	SDVLHTIKE	7.38	3	7	7.24	7.33	0.098	2.003	0.8532	Medium	7.24	7.33	0.055	1.124	0.8809	High	7.24	7.33	0.067	1.371	0.8679	Medium	7.24	7.34	0.075	1.524	0.927	High	7.24	7.33	0.076	1.551	0.8603	High	7.24	7.34	0.132	2.692	0.8482	Medium	7.24	7.33	0.162	3.298	0.9242	High	7.24
A_CD	391	401	SDVLHTIKEHA	7.91	3	9	7.85	8.25	0.078	1.232	0.866	Medium	7.85	8.25	0.064	1.014	0.8975	Medium	7.85	8.25	0.077	1.22	0.8642	Medium	7.86	8.25	0.077	1.22	0.8878	Medium	7.85	8.25	0.072	1.139	0.8464	Medium	7.86	8.25	0.077	1.227	0.885	Medium	7.85	8.25	0.156	2.47	0.889	Medium	7.85
A_CD	400	407	HAFVASEY	8.18	1	6	8.04	8.4	0.144	3.43	0.8773	Medium	8.04	8.4	0.164	3.898	0.8911	Medium	8.04	8.4	0.156	3.723	0.8773	Medium	8.04	8.4	0.838	19.946	0.8528	Medium	8.04	8.4	0.838	19.941	0.8207	Medium	8.04	8.4	0.834	19.857	0.8257	Medium	8.04	8.4	1.728	41.137	0.8471	Medium	8.04
A_CD	400	411	HAFVASEYPVIL	11.91	2	9	11.74	12.13	0.133	2.115	0.8888	Medium	11.74	12.13	0.115	1.831	0.9087	Medium	11.74	12.13	0.111	1.756	0.8679	Medium	11.75	12.13	0.622	9.881	0.8838	Medium	11.74	12.13	0.654	10.386	0.8342	Medium	11.75	12.13	0.588	9.34	0.8516	Medium	11.74	12.13	1.296	20.576	0.8762	Medium	11.74
A_CD	402	406	FVASE	6.03	1	3	5.96	6.27	0.253	12.066	0.8065	Medium	5.97	6.27	0.198	9.428	0.7976	Medium	5.97	6.27	0.215	10.227	0.7939	Medium	5.97	6.27	0.817	38.906	0.8121	Medium	5.97	6.27	0.803	38.218	0.8011	Medium	5.96	6.26	0.801	38.159	0.7847	Medium	5.96	6.26	1.472	70.102	0.8324	Medium	5.97
A_CD	407	411	YPVIL	12.15	1	3	11.77	12.3	0.02	0.941	0.9099	Medium	11.77	12.29	0.011	0.514	0.9136	Medium	11.77	12.29	0.014	0.664	0.9149	Medium	11.78	12.3	0.024	1.12	0.9121	Medium	11.77	12.29	0.018	0.849	0.9242	Medium	11.78	12.3	0.022	1.027	0.9128	Medium	11.77	12.3	0.008	0.397	0.9038	Medium	11.77
A_CD	412	437	SIEDHCSIAQQRNMAQHFRKVLGDTL	10.39	4	24	10.32	10.84	1.298	7.727	0.9284	High	10.32	10.84	1.269	7.554	0.9246	High	10.32	10.84	1.31	7.798	0.9289	High	10.33	10.85	2	11.902	0.926	High	10.32	10.84	2.003	11.922	0.9345	High	10.33	10.85	1.98	11.784	0.9297	High	10.32	10.84	3.155	18.78	0.9257	High	10.32
A_CD	428	437	HFRKVLGDTL	7.8	3	8	7.89	7.95	0.19	3.391	0.9367	Medium	7.89	7.96	0.206	3.679	0.9374	Medium	7.89	7.95	0.217	3.876	0.9203	Medium	7.89	7.96	0.607	10.835	0.8869	Medium	7.89	7.96	0.6	10.718	0.9102	Medium	7.89	7.96	0.593	10.589	0.9322	Medium	7.88	7.95	1.232	22.003	0.8863	Medium	7.89
A_CD	438	443	LTKPVD	4.58	1	3	4.6	4.86	0.561	26.716	0.8543	Medium	4.61	4.87	0.586	27.906	0.8779	Medium	4.6	4.87	0.594	28.272	0.8562	Medium	4.61	4.87	1.183	56.319	0.8861	Medium	4.6	4.87	1.153	54.886	0.8656	Medium	4.61	4.87	1.126	53.63	0.8831	Medium	4.61	4.86	1.627	77.487	0.8873	Medium	4.6
A_CD	438	446	LTKPVDIAA	7.34	1	6	7.27	7.66	1.941	46.21	0.8996	Medium	7.28	7.66	1.893	45.066	0.9053	Medium	7.27	7.66	1.946	46.322	0.8893	Medium	7.28	7.66	2.538	60.421	0.9047	Medium	7.28	7.66	2.55	60.716	0.8889	Medium	7.28	7.66	2.541	60.499	0.8889	Medium	7.27	7.66	3.05	72.618	0.8955	Medium	7.28
A_CD	438	455	LTKPVDIAADGLPSPNQL	10.67	3	13	10.49	10.69	2.203	24.21	0.9092	Medium	10.49	10.69	2.19	24.063	0.9275	Medium	10.49	10.69	2.23	24.51	0.9259	Medium	10.5	10.7	2.89	31.755	0.9383	Medium	10.49	10.69	2.904	31.915	0.928	Medium	10.5	10.7	2.904	31.913	0.9337	Medium	10.49	10.69	3.698	40.636	0.9355	Medium	10.49
A_CD	438	471	LTKPVDIAADGLPSPNQLKRKILIKHKKLAEGSA	8.17	5	29	7.81	8.64	3.791	18.674	0.9478	High	7.81	8.64	3.724	18.344	0.9421	High	7.81	8.64	3.81	18.768	0.9403	High	7.82	8.65	4.859	23.935	0.9325	High	7.81	8.64	4.898	24.129	0.9214	High	7.82	8.65	4.876	24.021	0.9322	High	7.81	8.64	5.963	29.375	0.9372	Medium	7.81
A_CD	438	472	LTKPVDIAADGLPSPNQLKRKILIKHKKLAEGSAY	8.72	5	30	8.53	8.6	4.231	20.149	0.9165	High	8.53	8.6	4.149	19.757	0.915	High	8.53	8.6	4.162	19.819	0.9116	High	8.54	8.61	5.173	24.632	0.9235	High	8.53	8.6	5.343	25.444	0.9033	High	8.54	8.61	5.294	25.208	0.9069	High	8.53	8.6	6.407	30.507	0.9148	High	8.53
A_CD	444	455	IAADGLPSPNQL	10.42	1	8	10.61	10.77	0.789	14.085	0.8705	Medium	10.61	10.77	0.803	14.343	0.8547	Medium	10.61	10.77	0.848	15.143	0.8436	Medium	10.61	10.77	1.064	18.998	0.8644	Medium	10.61	10.77	1.048	18.722	0.8664	Medium	10.61	10.77	1.065	19.013	0.8673	Medium	10.61	10.76	1.37	24.465	0.8653	Medium	10.61
A_CD	447	455	DGLPSPNQL	10.11	1	5	9.93	10.41	0.082	2.342	0.8736	Medium	9.93	10.41	0.053	1.515	0.8956	High	9.93	10.41	0.062	1.762	0.8807	High	9.93	10.41	0.061	1.749	0.8959	High	9.93	10.41	0.084	2.394	0.881	High	9.93	10.41	0.067	1.925	0.8641	High	9.93	10.4	0.16	4.576	0.8866	High	9.93
A_CD	447	471	DGLPSPNQLKRKILIKHKKLAEGSA	7.22	4	21	7.24	7.71	1.966	13.375	0.9028	Medium	7.24	7.71	1.971	13.406	0.9053	Medium	7.24	7.71	1.979	13.462	0.9069	Medium	7.24	7.72	2.41	16.391	0.9315	High	7.24	7.71	2.454	16.694	0.9246	Medium	7.24	7.72	2.447	16.646	0.9239	Medium	7.24	7.71	2.721	18.507	0.9419	High	7.24
A_CD	456	471	KRKILIKHKKLAEGSA	3.66	4	14	3.66	4.14	2.277	23.235	0.9662	High	3.66	4.14	2.274	23.204	0.9568	High	3.66	4.14	2.317	23.641	0.9646	High	3.66	4.14	2.757	28.136	0.966	High	3.66	4.14	2.774	28.306	0.9608	High	3.65	4.14	2.763	28.196	0.9687	High	3.65	4.15	2.882	29.412	0.9683	High	3.66
A_CD	456	472	KRKILIKHKKLAEGSAY	4.25	4	15	4.34	4.42	2.695	25.666	0.9632	Medium	4.35	4.42	2.668	25.409	0.961	Medium	4.34	4.42	2.768	26.365	0.9563	Medium	4.35	4.42	3.2	30.48	0.9589	High	4.34	4.42	3.246	30.91	0.9501	Medium	4.35	4.42	3.242	30.878	0.9521	Medium	4.35	4.42	3.33	31.719	0.9231	High	4.34
A_CD	472	480	YEEVPTSVM	9.79	1	6	9.64	10.43	3.21	76.437	0.8601	High	9.64	10.43	3.081	73.361	0.9282	High	9.64	10.43	3.136	74.66	0.9273	High	9.65	10.44	3.492	83.139	0.9094	High	9.64	10.43	3.541	84.315	0.922	High	9.65	10.44	3.518	83.768	0.9265	High	9.64	10.43	3.426	81.583	0.9289	High	9.64
A_CD	473	480	EEVPTSVM	9.08	1	5	8.85	9.44	2.811	80.316	0.8881	Medium	8.85	9.44	2.794	79.832	0.8847	Medium	8.85	9.44	2.835	81.002	0.8854	Medium	8.86	9.45	3.133	89.525	0.8919	Medium	8.85	9.44	3.163	90.385	0.8713	Medium	8.86	9.45	3.143	89.803	0.8641	Medium	8.85	9.44	3.124	89.256	0.8828	Medium	8.85
A_CD	481	488	YSENDISN	6.21	1	6	6.11	6.39	2.289	54.509	0.8751	High	6.11	6.39	2.276	54.193	0.8628	Medium	6.11	6.39	2.32	55.226	0.8676	High	6.11	6.4	3.039	72.358	0.8742	Medium	6.11	6.39	3.107	73.987	0.8524	Medium	6.1	6.39	3.117	74.22	0.8504	Medium	6.1	6.39	3.083	73.405	0.8731	Medium	6.11
A_CD	481	495	YSENDISNSIKNGIL	11.41	2	13	11.26	11.76	1.722	18.928	0.9125	High	11.26	11.77	1.677	18.433	0.9154	High	11.26	11.76	1.746	19.187	0.9277	High	11.27	11.77	3.331	36.609	0.9175	High	11.26	11.77	3.335	36.645	0.927	High	11.27	11.77	3.293	36.191	0.9287	High	11.26	11.76	3.771	41.441	0.9171	High	11.26
A_CD	481	496	YSENDISNSIKNGILY	11.53	2	14	11.45	11.58	2.057	20.994	0.8868	Medium	11.46	11.58	1.656	16.9	0.9016	High	11.45	11.58	1.876	19.139	0.859	Medium	11.46	11.59	3.409	34.791	0.8896	Medium	11.46	11.58	3.601	36.742	0.8664	Medium	11.46	11.59	3.417	34.866	0.8586	Medium	11.45	11.58	3.784	38.615	0.86	Medium	11.46
A_CD	481	509	YSENDISNSIKNGILYLEDPVNHEWYPHY	13.81	4	25	13.74	13.85	1.54	8.798	0.9324	High	13.74	13.84	1.39	7.946	0.9373	High	13.75	13.85	1.496	8.55	0.9309	High	13.74	13.85	2.909	16.625	0.9393	High	13.74	13.84	3.024	17.279	0.9379	High	13.74	13.85	2.973	16.989	0.9401	High	13.75	13.85	3.694	21.109	0.9365	High	13.74
A_CD	489	495	SIKNGIL	8.77	2	5	8.61	8.95	0.064	1.819	0.9242	High	8.61	8.95	0.059	1.674	0.9585	High	8.61	8.95	0.077	2.192	0.9492	High	8.61	8.96	0.313	8.94	0.9171	High	8.61	8.95	0.337	9.617	0.8992	Medium	8.61	8.96	0.317	9.05	0.9493	Medium	8.61	8.95	0.627	17.906	0.9221	High	8.61
A_CD	496	509	YLEDPVNHEWYPHY	10.77	2	10	10.48	11.27	0.058	0.824	0.9056	Medium	10.48	11.27	0.032	0.45	0.921	Medium	10.48	11.27	0.082	1.169	0.8972	Medium	10.49	11.28	0.065	0.93	0.9215	Medium	10.48	11.27	0.062	0.889	0.9071	Medium	10.49	11.28	0.083	1.18	0.9181	Medium	10.48	11.27	0.225	3.21	0.9095	Medium	10.48
A_CD	497	509	LEDPVNHEWYPHY	10.4	3	9	10.45	10.5	0.098	1.562	0.883	High	10.45	10.5	0.091	1.438	0.8995	High	10.45	10.5	0.08	1.268	0.8961	High	10.45	10.5	0.185	2.93	0.8875	High	10.45	10.5	0.129	2.044	0.8816	High	10.45	10.5	0.174	2.757	0.8903	High	10.45	10.5	0.404	6.408	0.8642	High	10.45
A_CD	510	519	FVLTSSKIYY	10.93	2	8	10.79	11.18	0.263	4.702	0.8145	Medium	10.79	11.18	0.313	5.591	0.8178	Medium	10.79	11.18	0.303	5.407	0.7758	Medium	10.8	11.18	0.934	16.673	0.7903	Medium	10.79	11.18	0.982	17.543	0.8132	Medium	10.8	11.18	0.97	17.33	0.8028	Medium	10.79	11.18	1.09	19.467	0.7783	Medium	10.79
A_CD	510	522	FVLTSSKIYYSEE	10.17	2	11	10.07	10.41	0.673	8.741	0.9217	High	10.07	10.41	0.617	8.017	0.9185	High	10.07	10.41	0.669	8.69	0.9226	High	10.08	10.42	1.691	21.964	0.9216	High	10.07	10.41	1.783	23.155	0.9285	High	10.08	10.42	1.749	22.717	0.9245	High	10.07	10.41	1.953	25.357	0.9167	High	10.07
A_CD	523	530	TSSDQGNE	3.19	1	6	3.33	3.5	2.264	53.913	0.8372	Medium	3.33	3.51	2.34	55.724	0.8474	Medium	3.33	3.5	2.351	55.973	0.8428	Medium	3.33	3.51	2.326	55.382	0.8506	Medium	3.33	3.5	2.346	55.851	0.8042	Medium	3.32	3.5	2.337	55.635	0.8146	Medium	3.32	3.5	2.299	54.74	0.8641	Medium	3.33
A_CD	523	531	TSSDQGNED	3.46	1	7	3.45	3.58	2.583	52.706	0.7872	Medium	3.45	3.58	2.52	51.431	0.8023	Medium	3.45	3.58	2.666	54.404	0.7949	Medium	3.46	3.58	2.688	54.861	0.786	Medium	3.45	3.58	2.759	56.316	0.7917	Medium	3.45	3.58	2.664	54.36	0.7863	Medium	3.45	3.57	2.646	53.992	0.8145	Medium	3.45
A_CD	545	566	HSSEKWFHGKLGAGRDGRHIAE	6.25	5	20	6.13	6.26	2.574	18.386	0.8592	High	6.13	6.26	2.514	17.956	0.8783	High	6.13	6.26	2.629	18.778	0.8597	High	6.14	6.26	4.052	28.941	0.9241	High	6.13	6.26	4.161	29.72	0.9215	High	6.13	6.25	4.112	29.373	0.8938	Medium	6.13	6.25	4.99	35.641	0.9199	High	6.13
A_CD	545	568	HSSEKWFHGKLGAGRDGRHIAERL	6.89	5	22	6.8	7.31	1.98	12.859	0.9003	High	6.8	7.31	1.914	12.43	0.9032	High	6.8	7.31	1.984	12.884	0.8972	High	6.8	7.31	3.683	23.915	0.9097	High	6.8	7.31	3.841	24.941	0.914	High	6.79	7.31	3.784	24.571	0.9074	High	6.79	7.3	5.217	33.877	0.9123	High	6.8
A_CD	572	583	YCIETGAPDGSF	10.72	1	9	10.57	11.25	0.361	5.728	0.8992	High	10.57	11.25	0.351	5.578	0.9279	High	10.57	11.25	0.372	5.907	0.9128	High	10.58	11.26	1.426	22.629	0.9228	High	10.57	11.25	1.444	22.925	0.9119	High	10.58	11.26	1.402	22.253	0.9116	High	10.57	11.25	2.266	35.972	0.9239	High	10.57
A_CD	573	583	CIETGAPDGSF	9.62	1	8	9.41	9.94	0.414	7.388	0.8609	Medium	9.41	9.94	0.408	7.281	0.8635	Medium	9.41	9.94	0.396	7.067	0.8429	Medium	9.41	9.94	1.473	26.312	0.8687	High	9.41	9.94	1.507	26.91	0.8574	Medium	9.41	9.94	1.426	25.465	0.8453	Medium	9.4	9.93	2.261	40.367	0.8621	Medium	9.41
A_CD	573	584	CIETGAPDGSFL	11.73	1	9	11.55	11.93	0.342	5.433	0.8063	Medium	11.55	11.93	0.343	5.442	0.8116	Medium	11.55	11.93	0.36	5.708	0.7996	Medium	11.55	11.94	1.267	20.105	0.7954	Medium	11.55	11.93	1.286	20.413	0.7676	Medium	11.55	11.94	1.284	20.383	0.7772	Medium	11.55	11.93	1.95	30.956	0.7721	Medium	11.55
A_CD	574	583	IETGAPDGSF	9.08	1	7	8.98	9.41	0.402	8.204	0.8548	Medium	8.98	9.41	0.395	8.061	0.8729	Medium	8.98	9.41	0.379	7.739	0.8607	Medium	8.98	9.41	1.258	25.682	0.87	Medium	8.98	9.41	1.293	26.379	0.8745	Medium	8.98	9.41	1.256	25.639	0.8691	Medium	8.98	9.4	1.721	35.128	0.8783	Medium	8.98
A_CD	584	590	LVRESET	4.35	2	5	4.29	4.77	1.263	36.079	0.9293	High	4.29	4.77	1.235	35.274	0.9024	High	4.29	4.77	1.255	35.852	0.9299	High	4.29	4.77	1.472	42.061	0.9394	High	4.29	4.77	1.485	42.432	0.9499	High	4.29	4.78	1.465	41.849	0.9468	High	4.29	4.77	2.006	57.307	0.9462	High	4.29
A_CD	595	599	YTLSF	12.25	1	3	12.02	12.44	0.022	1.066	0.8315	Medium	12.03	12.44	0.014	0.677	0.835	Medium	12.02	12.44	0.002	0.103	0.83	Medium	12.03	12.44	0.015	0.714	0.8503	High	12.03	12.44	0.018	0.86	0.8438	Medium	12.03	12.44	0.012	0.569	0.8432	Medium	12.02	12.44	0.011	0.536	0.8492	Medium	12.03
A_CD	600	621	WRNGKVQHCRIHSRQDAGTPKF	5.45	5	19	5.36	6.45	1.52	11.428	0.9386	High	5.36	6.45	1.482	11.14	0.9341	High	5.36	6.45	1.519	11.425	0.9355	High	5.36	6.45	1.864	14.012	0.9365	High	5.36	6.45	1.914	14.389	0.9447	High	5.35	6.45	1.875	14.097	0.9348	High	5.36	6.45	2.324	17.474	0.9386	High	5.36
A_CD	622	627	FLTDNL	10.94	1	4	10.79	11.15	0.71	25.341	0.8991	Medium	10.79	11.15	0.686	24.516	0.9063	Medium	10.79	11.15	0.716	25.558	0.9021	Medium	10.8	11.16	1.393	49.746	0.8973	Medium	10.79	11.15	1.418	50.655	0.8788	Medium	10.8	11.16	1.394	49.791	0.8778	Medium	10.79	11.15	1.856	66.269	0.8693	Medium	10.79
A_CD	622	629	FLTDNLVF	14.01	1	6	13.84	14.2	0.491	11.682	0.9073	High	13.83	14.19	0.458	10.899	0.9153	Medium	13.84	14.2	0.486	11.576	0.9081	Medium	13.84	14.2	1.123	26.73	0.9205	High	13.83	14.2	1.172	27.894	0.9011	Medium	13.84	14.2	1.126	26.803	0.9153	Medium	13.84	14.2	1.801	42.878	0.9117	Medium	13.83
A_CD	628	632	VFDSL	10.45	1	3	10.44	10.7	0.157	7.499	0.8216	Medium	10.44	10.7	0.143	6.828	0.8117	Medium	10.44	10.7	0.151	7.208	0.8138	Medium	10.44	10.7	0.84	39.977	0.8611	Medium	10.44	10.7	0.847	40.328	0.8269	Medium	10.44	10.71	0.857	40.829	0.8256	Medium	10.44	10.7	0.9	42.838	0.8551	Medium	10.44
A_CD	633	637	YDLIT	9.85	1	3	9.73	10.13	0.014	0.674	0.8594	Medium	9.73	10.13	0.012	0.589	0.8656	Medium	9.73	10.13	0.025	1.188	0.8619	Medium	9.74	10.13	0.011	0.504	0.8419	Medium	9.73	10.13	0.003	0.121	0.806	Medium	9.74	10.13	0.019	0.903	0.8461	Medium	9.73	10.13	0.018	0.847	0.8397	Medium	9.73
A_CD	633	646	YDLITHYQQVPLRC	10.28	3	11	10.22	10.39	0.782	10.161	0.8733	Medium	10.22	10.39	0.717	9.309	0.917	High	10.22	10.39	0.753	9.778	0.9093	High	10.23	10.39	1.341	17.417	0.9261	High	10.22	10.39	1.364	17.718	0.9242	High	10.23	10.39	1.348	17.513	0.9267	High	10.22	10.39	1.98	25.71	0.9298	High	10.22
A_CD	633	648	YDLITHYQQVPLRCNE	9.85	3	13	9.74	9.84	1.214	13.339	0.934	High	9.74	9.84	1.208	13.271	0.9271	High	9.74	9.84	1.254	13.782	0.9349	High	9.75	9.85	1.779	19.544	0.924	High	9.74	9.84	1.802	19.803	0.9252	High	9.75	9.85	1.819	19.991	0.9243	High	9.74	9.84	2.374	26.091	0.9259	High	9.74
A_CD	636	646	ITHYQQVPLRC	7.78	2	8	7.68	7.89	0.778	13.894	0.9247	High	7.68	7.89	0.778	13.888	0.9213	High	7.68	7.89	0.798	14.247	0.9191	High	7.68	7.89	1.429	25.52	0.939	High	7.68	7.89	1.416	25.291	0.9215	High	7.68	7.89	1.421	25.368	0.9329	High	7.67	7.88	2.121	37.881	0.9143	High	7.68
A_CD	638	648	HYQQVPLRCNE	6.79	3	8	6.84	6.91	1.34	23.928	0.9077	High	6.84	6.91	1.336	23.849	0.9037	High	6.84	6.91	1.346	24.041	0.9034	High	6.84	6.92	1.978	35.327	0.8875	Medium	6.84	6.91	1.899	33.916	0.8806	Medium	6.84	6.91	1.904	34	0.8831	High	6.83	6.91	2.529	45.152	0.8894	Medium	6.84
A_CD	640	648	QQVPLRCNE	6.68	2	6	6.58	6.8	1.647	39.225	0.9076	Medium	6.58	6.81	1.638	39.001	0.9096	Medium	6.58	6.8	1.637	38.976	0.8957	Medium	6.58	6.81	2.215	52.742	0.9079	Medium	6.58	6.81	2.23	53.104	0.8973	Medium	6.57	6.8	2.216	52.762	0.8965	Medium	6.57	6.8	2.676	63.724	0.908	Medium	6.58
A_CD	649	662	FEMRLSEPVPQTNA	9.69	2	10	9.73	9.78	1.526	21.798	0.927	High	9.73	9.79	1.487	21.237	0.924	High	9.73	9.78	1.548	22.114	0.9295	High	9.74	9.79	2.733	39.047	0.9145	High	9.73	9.79	2.768	39.548	0.9254	High	9.74	9.79	2.745	39.212	0.924	High	9.73	9.78	3.469	49.551	0.9232	High	9.73
A_CD	649	667	FEMRLSEPVPQTNAHESKE	8.33	4	15	8.18	8.76	1.62	15.431	0.9428	High	8.18	8.76	1.591	15.151	0.9378	High	8.18	8.76	1.636	15.581	0.932	High	8.19	8.76	2.892	27.542	0.9383	High	8.18	8.76	2.961	28.196	0.9372	High	8.19	8.76	2.92	27.811	0.9373	High	8.18	8.76	3.939	37.519	0.9351	High	8.18
A_CD	650	662	EMRLSEPVPQTNA	8.18	2	9	8.11	8.18	1.617	25.666	0.8351	Medium	8.12	8.18	1.609	25.538	0.8379	Medium	8.11	8.18	1.634	25.937	0.8389	Medium	8.12	8.19	2.558	40.605	0.7839	Medium	8.11	8.18	2.619	41.575	0.7771	Medium	8.12	8.19	2.612	41.453	0.8017	Medium	8.11	8.18	3.13	49.676	0.7919	Medium	8.11
A_CD	650	667	EMRLSEPVPQTNAHESKE	6.68	4	14	6.58	7.08	1.909	19.475	0.9304	High	6.58	7.08	1.871	19.092	0.9274	High	6.58	7.08	1.921	19.6	0.9242	High	6.58	7.08	3.088	31.505	0.9091	High	6.58	7.08	3.114	31.771	0.9155	High	6.57	7.09	3.106	31.696	0.9086	High	6.57	7.08	3.961	40.421	0.9031	High	6.58
A_CD	651	662	MRLSEPVPQTNA	7.8	2	8	7.68	7.77	1.621	28.946	0.7748	Medium	7.68	7.77	1.555	27.77	0.8102	Medium	7.68	7.77	1.633	29.159	0.808	Medium	7.68	7.77	2.28	40.708	0.877	Medium	7.68	7.77	2.357	42.081	0.8145	Medium	7.68	7.77	2.248	40.151	0.8424	Medium	7.67	7.77	2.732	48.784	0.8623	Medium	7.68
A_CD	651	667	MRLSEPVPQTNAHESKE	6.4	4	13	6.21	6.63	1.873	20.58	0.9458	High	6.21	6.63	1.851	20.338	0.9493	High	6.21	6.63	1.888	20.747	0.9504	High	6.21	6.63	2.673	29.375	0.9234	High	6.21	6.63	2.69	29.558	0.9295	Medium	6.2	6.62	2.662	29.253	0.924	High	6.2	6.62	3.525	38.741	0.9258	Medium	6.21
A_CD	668	682	WYHASLTRAQAEHML	9.41	3	13	9.54	9.66	1.108	12.171	0.9023	High	9.54	9.66	1.047	11.501	0.9159	High	9.54	9.66	1.116	12.262	0.9215	High	9.55	9.66	1.959	21.529	0.8432	Medium	9.54	9.66	1.997	21.945	0.881	Medium	9.55	9.66	1.938	21.292	0.887	Medium	9.54	9.66	2.756	30.29	0.8569	Medium	9.54
A_CD	674	682	TRAQAEHML	6.79	2	7	6.69	7.12	0.23	4.699	0.9191	High	6.69	7.12	0.223	4.548	0.9224	High	6.69	7.12	0.234	4.785	0.9079	High	6.69	7.13	0.551	11.241	0.9147	Medium	6.69	7.12	0.55	11.234	0.9192	High	6.68	7.13	0.543	11.087	0.9117	High	6.68	7.12	0.896	18.291	0.9153	High	6.69
A_CD	683	691	MRVPRDGAF	8.07	2	6	7.99	8.3	0.101	2.407	0.9167	Medium	7.99	8.3	0.106	2.531	0.9167	Medium	7.99	8.3	0.089	2.13	0.9203	Medium	7.99	8.3	0.222	5.295	0.8731	Medium	7.99	8.3	0.208	4.961	0.8998	Medium	7.99	8.3	0.198	4.719	0.9093	Medium	7.98	8.3	0.358	8.517	0.9176	Medium	7.99
A_CD	692	701	LVRKRNEPNS	3.34	3	7	3.26	3.75	1.615	32.956	0.9672	High	3.26	3.75	1.603	32.724	0.9679	High	3.26	3.75	1.624	33.136	0.9599	High	3.26	3.75	2.441	49.82	0.9575	High	3.26	3.75	2.452	50.038	0.9566	High	3.26	3.75	2.435	49.688	0.9651	High	3.25	3.74	2.459	50.183	0.9639	High	3.26
A_CD	692	702	LVRKRNEPNSY	4.14	3	8	4.09	4.76	1.431	25.555	0.9588	High	4.09	4.76	1.411	25.196	0.9606	High	4.09	4.76	1.429	25.519	0.9619	High	4.09	4.77	2.167	38.693	0.9602	High	4.09	4.76	2.178	38.9	0.9437	High	4.09	4.77	2.159	38.546	0.9597	High	4.09	4.76	2.176	38.853	0.9593	High	4.09
A_CD	693	702	VRKRNEPNSY	3.93	3	7	3.87	4.34	1.451	29.609	0.9461	High	3.87	4.34	1.411	28.803	0.9471	High	3.87	4.34	1.444	29.462	0.9454	High	3.88	4.34	2.196	44.811	0.927	High	3.87	4.34	2.256	46.035	0.8781	Medium	3.88	4.34	2.205	44.994	0.9138	Medium	3.88	4.34	2.188	44.651	0.9063	High	3.87
A_CD	707	725	RAEGKIKHCRVQQEGQTVM	5.03	4	17	4.96	5.7	1.269	10.666	0.9426	High	4.96	5.7	1.263	10.61	0.9379	High	4.96	5.7	1.296	10.891	0.9482	High	4.96	5.7	1.95	16.39	0.9474	High	4.96	5.7	1.985	16.677	0.9515	High	4.96	5.7	1.947	16.363	0.9519	High	4.95	5.69	3.426	28.788	0.9481	High	4.96
A_CD	723	731	TVMLGNSEF	11.22	1	7	11.16	11.3	0.955	19.493	0.8058	Medium	11.16	11.3	0.863	17.621	0.803	Medium	11.16	11.3	0.918	18.733	0.802	Medium	11.17	11.31	1.059	21.618	0.8025	Medium	11.16	11.3	1.087	22.192	0.7716	Medium	11.17	11.31	1.078	21.996	0.7835	Medium	11.16	11.3	1.421	28.996	0.8365	Medium	11.16
A_CD	741	758	YEKHPLYRKMKLRYPINE	7.32	3	14	7.59	7.69	0.526	5.363	0.9517	High	7.59	7.7	0.512	5.226	0.9525	High	7.59	7.69	0.497	5.072	0.9472	High	7.6	7.7	1.003	10.232	0.9458	High	7.59	7.7	1.034	10.547	0.9402	High	7.6	7.7	1.017	10.375	0.956	High	7.59	7.69	1.706	17.407	0.9542	High	7.59
A_CD	741	760	YEKHPLYRKMKLRYPINEEA	7.42	3	16	7.29	7.53	0.488	4.353	0.919	High	7.29	7.54	0.595	5.314	0.5509	Medium	7.29	7.53	0.485	4.334	0.9049	High	7.29	7.54	1.282	11.442	0.9114	High	7.29	7.54	1.373	12.262	0.8826	Medium	7.3	7.54	1.35	12.055	0.9052	Medium	7.29	7.53	2.44	21.782	0.9157	Medium	7.29
A_CD	747	758	YRKMKLRYPINE	7.16	4	9	7.21	7.34	0.539	8.557	0.9464	High	7.21	7.34	0.521	8.277	0.9494	High	7.21	7.34	0.522	8.292	0.949	High	7.21	7.35	0.915	14.518	0.9443	High	7.21	7.34	0.935	14.841	0.9471	High	7.21	7.35	0.926	14.695	0.9436	High	7.2	7.34	1.333	21.166	0.9467	High	7.21
A_CD	761	774	LEKIGTAEPDYGAL	9.85	2	11	9.71	10.31	3.606	46.825	0.9008	Medium	9.71	10.31	3.504	45.508	0.8978	Medium	9.71	10.31	3.591	46.635	0.896	Medium	9.71	10.32	5.426	70.471	0.8964	Medium	9.71	10.31	5.47	71.037	0.8917	Medium	9.71	10.32	5.438	70.628	0.8942	Medium	9.71	10.31	5.524	71.743	0.9023	High	9.71
A_CD	762	774	EKIGTAEPDYGAL	9.35	2	10	9.21	9.97	3.457	49.391	0.9187	High	9.21	9.97	3.35	47.864	0.9062	High	9.21	9.97	3.432	49.035	0.9171	High	9.22	9.97	4.871	69.588	0.8949	High	9.21	9.97	4.939	70.564	0.9077	High	9.22	9.97	4.895	69.932	0.9111	High	9.21	9.97	5	71.431	0.9027	High	9.21
A_CD	775	782	YEGRNPGF	7.69	1	5	7.55	8.02	2.5	71.421	0.9246	High	7.55	8.02	2.464	70.399	0.9248	High	7.55	8.02	2.499	71.399	0.9272	High	7.56	8.03	2.602	74.343	0.915	High	7.55	8.02	2.577	73.623	0.9158	Medium	7.56	8.03	2.575	73.568	0.9247	High	7.55	8.02	2.544	72.681	0.9356	High	7.55
A_CD	783	792	YVEANPMPTF	11.57	1	6	11.16	12	3.051	72.632	0.9173	High	11.16	12	3.061	72.873	0.936	High	11.16	12	3.128	74.474	0.9283	High	11.17	12.01	3.455	82.26	0.9343	High	11.16	12	3.481	82.881	0.9297	High	11.17	12.01	3.444	82.003	0.9342	High	11.16	12	3.361	80.023	0.9371	High	11.16
A_CD	783	801	YVEANPMPTFKCAVKALFD	13.3	3	15	13.36	13.46	3.746	35.674	0.9084	High	13.35	13.45	3.709	35.32	0.9022	High	13.36	13.46	3.77	35.902	0.9021	High	13.36	13.46	4.529	43.131	0.8824	High	13.35	13.45	4.655	44.336	0.8928	Medium	13.36	13.46	4.58	43.617	0.8926	Medium	13.36	13.46	4.85	46.188	0.9107	High	13.35
A_CD	793	800	KCAVKALF	9.3	1	6	9.16	9.43	0.067	1.584	0.8959	Medium	9.16	9.43	0.057	1.349	0.9123	Medium	9.16	9.43	0.063	1.491	0.9312	Medium	9.17	9.44	0.198	4.72	0.9425	Medium	9.16	9.43	0.197	4.698	0.9131	Medium	9.17	9.44	0.209	4.969	0.9148	Medium	9.16	9.43	0.364	8.668	0.9289	High	9.16
A_CD	793	801	KCAVKALFD	8.87	2	7	8.7	9.3	0.105	2.143	0.8832	Medium	8.7	9.3	0.083	1.7	0.8863	Medium	8.7	9.3	0.174	3.555	0.8408	Medium	8.71	9.3	0.294	6.006	0.8563	Medium	8.7	9.3	0.256	5.219	0.8315	Medium	8.71	9.3	0.279	5.702	0.8679	Medium	8.7	9.29	0.687	14.01	0.8876	Medium	8.7
A_CD	801	809	DYKAQREDE	4.2	2	7	4.18	4.56	0.751	15.329	0.9179	Medium	4.18	4.56	0.719	14.681	0.9193	Medium	4.18	4.56	0.747	15.253	0.9082	Medium	4.18	4.56	1.835	37.449	0.8924	Medium	4.18	4.56	1.846	37.673	0.8846	Medium	4.18	4.56	1.841	37.569	0.871	Medium	4.18	4.57	2.691	54.918	0.8794	Medium	4.18
A_CD	801	810	DYKAQREDEL	7.06	2	8	6.92	7.32	0.746	13.32	0.91	High	6.92	7.33	0.727	12.986	0.9175	High	6.92	7.32	0.806	14.385	0.8846	Medium	6.93	7.33	1.713	30.584	0.9132	High	6.92	7.33	1.738	31.031	0.8954	Medium	6.92	7.33	1.714	30.607	0.8853	Medium	6.92	7.32	2.593	46.295	0.9022	Medium	6.92
A_CD	802	809	YKAQREDE	3.88	2	6	3.76	4.06	0.653	15.547	0.9266	Medium	3.76	4.06	0.633	15.064	0.9378	Medium	3.76	4.06	0.656	15.621	0.9458	Medium	3.76	4.06	1.334	31.769	0.9214	Medium	3.76	4.06	1.366	32.523	0.9226	Medium	3.76	4.06	1.327	31.583	0.938	Medium	3.75	4.06	1.954	46.533	0.9156	Medium	3.76
A_CD	802	810	YKAQREDEL	6.28	2	7	6.25	6.59	0.617	12.599	0.9028	Medium	6.25	6.6	0.613	12.513	0.9128	Medium	6.25	6.59	0.602	12.287	0.9026	Medium	6.25	6.6	1.173	23.936	0.8982	Medium	6.25	6.6	1.199	24.479	0.8908	Medium	6.25	6.59	1.176	24.003	0.9116	Medium	6.25	6.59	1.803	36.786	0.9002	Medium	6.25
A_CD	802	811	YKAQREDELT	5.62	2	8	5.6	6.04	0.61	10.893	0.9435	High	5.6	6.04	0.631	11.276	0.8709	Medium	5.6	6.04	0.603	10.76	0.9439	High	5.61	6.04	1.206	21.533	0.9402	High	5.6	6.04	1.268	22.639	0.8807	Medium	5.61	6.04	1.283	22.903	0.8749	Medium	5.6	6.04	1.889	33.734	0.9296	Medium	5.6
A_CD	810	819	LTFTKSAIIQ	9.41	2	8	9.31	9.55	0.082	1.462	0.9461	Medium	9.32	9.55	0.079	1.402	0.953	Medium	9.31	9.55	0.078	1.396	0.9452	Medium	9.32	9.55	0.474	8.466	0.9385	Medium	9.32	9.55	0.48	8.569	0.9263	Medium	9.32	9.55	0.474	8.458	0.9404	Medium	9.31	9.55	1.211	21.617	0.9145	Medium	9.31
A_CD	810	828	LTFTKSAIIQNVEKQDGGW	11	3	17	10.93	11.44	1.664	13.983	0.9041	High	10.93	11.44	1.635	13.737	0.9018	High	10.93	11.44	1.672	14.052	0.8619	Medium	10.93	11.44	2.877	24.179	0.8964	High	10.93	11.44	2.898	24.35	0.8787	High	10.93	11.44	2.847	23.928	0.8982	High	10.92	11.44	4.24	35.629	0.8967	High	10.93
A_CD	811	819	TFTKSAIIQ	7.81	1	7	7.74	8.02	0.055	1.121	0.8627	Medium	7.74	8.02	0.061	1.238	0.8801	Medium	7.74	8.02	0.036	0.735	0.8949	Medium	7.74	8.03	0.431	8.793	0.8632	Medium	7.74	8.02	0.435	8.868	0.8518	Medium	7.74	8.03	0.411	8.394	0.8551	Medium	7.73	8.02	1.091	22.265	0.8728	Medium	7.74
A_CD	811	822	TFTKSAIIQNVE	8.74	2	10	8.75	8.82	0.125	1.788	0.8662	Medium	8.75	8.82	0.118	1.692	0.8625	Medium	8.75	8.82	0.091	1.303	0.8578	Medium	8.76	8.82	0.595	8.5	0.8659	Medium	8.75	8.82	0.663	9.467	0.8281	Medium	8.76	8.82	0.648	9.262	0.829	Medium	8.75	8.82	1.69	24.145	0.8305	Medium	8.75
A_CD	811	828	TFTKSAIIQNVEKQDGGW	10.4	3	16	10.3	10.81	1.668	14.894	0.9275	High	10.3	10.81	1.651	14.745	0.9307	High	10.3	10.81	1.687	15.067	0.9222	High	10.3	10.81	2.828	25.253	0.9261	High	10.3	10.81	2.884	25.754	0.9228	High	10.3	10.81	2.818	25.162	0.9126	High	10.29	10.81	4.134	36.911	0.9303	High	10.3
A_CD	812	820	FTKSAIIQN	6.83	1	7	6.73	6.94	0.047	0.96	0.8034	Medium	6.73	6.94	0.042	0.864	0.86	Medium	6.73	6.94	0.061	1.245	0.7961	Medium	6.73	6.94	0.445	9.082	0.8848	Medium	6.73	6.94	0.513	10.472	0.8411	Medium	6.72	6.93	0.523	10.679	0.8527	Medium	6.72	6.93	1.225	24.999	0.8579	Medium	6.73
A_CD	812	828	FTKSAIIQNVEKQDGGW	10.17	3	15	10.07	10.62	1.671	15.91	0.9401	High	10.07	10.62	1.657	15.777	0.9379	High	10.07	10.62	1.666	15.868	0.9466	High	10.08	10.62	2.783	26.508	0.9379	High	10.07	10.62	2.82	26.857	0.9409	High	10.08	10.62	2.759	26.276	0.9375	High	10.07	10.61	4.031	38.394	0.9325	High	10.07
A_CD	829	844	WRGDYGGKKQLWFPSN	9.74	3	13	9.71	10.18	1.03	11.318	0.9241	High	9.71	10.18	1.004	11.03	0.9205	High	9.71	10.18	1.016	11.166	0.9255	High	9.71	10.18	1.438	15.799	0.914	High	9.71	10.18	1.446	15.892	0.9193	High	9.71	10.18	1.447	15.9	0.9215	High	9.71	10.18	1.655	18.186	0.9124	High	9.71
A_CD	829	845	WRGDYGGKKQLWFPSNY	10.66	4	14	10.46	11.04	0.898	9.162	0.945	High	10.46	11.04	0.866	8.836	0.9556	High	10.46	11.04	0.882	9.004	0.9535	High	10.46	11.05	1.274	13.004	0.9493	High	10.46	11.04	1.283	13.092	0.9554	High	10.46	11.05	1.272	12.982	0.9554	High	10.45	11.04	1.47	15.002	0.9421	High	10.46
A_CD	849	860	MINPAILEPERE	10.22	2	8	10.16	10.27	3.055	54.562	0.9238	High	10.16	10.27	3.049	54.447	0.6049	Medium	10.16	10.27	3.047	54.405	0.9211	High	10.17	10.28	4.801	85.741	0.9065	High	10.16	10.27	4.916	87.784	0.902	High	10.17	10.28	4.846	86.537	0.9143	High	10.16	10.27	4.745	84.728	0.9168	High	10.16
A_CD	849	862	MINPAILEPEREHL	10.28	3	10	9.81	10.75	3.281	46.866	0.9454	High	9.81	10.75	3.227	46.106	0.9436	High	9.81	10.75	3.31	47.285	0.942	High	9.82	10.76	5.017	71.673	0.9331	High	9.81	10.75	5.06	72.281	0.9366	High	9.81	10.76	5.043	72.038	0.9222	High	9.81	10.75	4.899	69.983	0.9189	High	9.81
A_CD	849	871	MINPAILEPEREHLDENSPLGDL	12.05	3	18	11.65	12.46	3.787	30.058	0.9002	High	11.65	12.45	3.727	29.576	0.899	High	11.65	12.45	3.785	30.039	0.9001	High	11.65	12.46	6.193	49.151	0.8861	Medium	11.65	12.45	6.236	49.492	0.8935	Medium	11.65	12.46	6.14	48.733	0.8824	Medium	11.65	12.46	7.058	56.013	0.896	Medium	11.65
A_CD	849	872	MINPAILEPEREHLDENSPLGDLL	13.09	3	19	13	13.12	3.472	26.105	0.9438	High	12.99	13.11	3.389	25.483	0.9431	High	13	13.12	3.469	26.081	0.9417	High	13	13.12	5.76	43.305	0.9351	High	12.99	13.11	5.825	43.795	0.9489	High	13	13.12	5.757	43.285	0.9449	High	13	13.12	6.886	51.775	0.9401	High	12.99
A_CD	849	876	MINPAILEPEREHLDENSPLGDLLRGVL	14.06	4	23	13.69	14.26	2.82	17.518	0.9396	High	13.68	14.25	2.715	16.861	0.944	High	13.69	14.26	2.812	17.467	0.9405	High	13.69	14.26	5.039	31.296	0.9389	High	13.68	14.26	5.184	32.198	0.9278	High	13.69	14.26	5.093	31.634	0.9389	High	13.69	14.26	7.067	43.893	0.9229	High	13.68
A_CD	856	871	EPEREHLDENSPLGDL	10.34	3	13	10.28	10.35	1.401	15.391	0.8902	Medium	10.28	10.35	1.354	14.879	0.8921	Medium	10.28	10.35	1.381	15.176	0.8886	Medium	10.29	10.35	2.177	23.925	0.8916	Medium	10.28	10.35	2.236	24.572	0.8762	Medium	10.29	10.35	2.174	23.885	0.8737	Medium	10.28	10.34	3.182	34.966	0.902	Medium	10.28
A_CD	856	876	EPEREHLDENSPLGDLLRGVL	13.81	3	18	13.76	13.92	0.613	4.863	0.9273	High	13.76	13.91	0.634	5.03	0.9288	High	13.76	13.92	0.643	5.101	0.9322	High	13.76	13.92	1.405	11.151	0.9313	High	13.75	13.91	1.542	12.24	0.9178	High	13.76	13.92	1.459	11.579	0.9326	High	13.76	13.92	3.499	27.769	0.9102	High	13.76
A_CD	861	872	HLDENSPLGDLL	12.73	2	9	12.6	12.72	0.569	9.035	0.9003	Medium	12.6	12.71	0.58	9.209	0.8835	Medium	12.6	12.72	0.571	9.066	0.8732	Medium	12.6	12.72	1.241	19.704	0.8948	Medium	12.6	12.71	1.308	20.765	0.8803	Medium	12.6	12.72	1.211	19.224	0.8883	Medium	12.6	12.71	2.412	38.288	0.9102	Medium	12.6
A_CD	861	876	HLDENSPLGDLLRGVL	13.97	3	13	13.86	14.26	0.345	3.794	0.95	High	13.86	14.26	0.372	4.092	0.9348	High	13.86	14.27	0.401	4.408	0.9156	High	13.86	14.27	1.086	11.939	0.9536	High	13.86	14.27	1.124	12.352	0.9149	High	13.86	14.26	1.107	12.164	0.9002	High	13.86	14.27	3.167	34.799	0.9499	High	13.86
A_CD	863	871	DENSPLGDL	11.52	1	6	11.29	11.76	0.445	10.604	0.7979	Medium	11.3	11.77	0.43	10.246	0.8036	Medium	11.3	11.76	0.468	11.154	0.7748	Medium	11.3	11.77	1.058	25.179	0.803	Medium	11.3	11.77	1.099	26.16	0.7776	Medium	11.3	11.77	1.088	25.913	0.7756	Medium	11.29	11.76	2.124	50.562	0.8018	Medium	11.3
A_CD	863	872	DENSPLGDLL	13.35	1	7	13.26	13.44	0.672	13.719	0.8374	Medium	13.25	13.44	0.749	15.289	0.8452	Medium	13.26	13.44	0.74	15.106	0.8335	Medium	13.26	13.44	1.244	25.381	0.882	Medium	13.25	13.44	1.371	27.972	0.8486	Medium	13.26	13.44	1.3	26.522	0.8679	Medium	13.26	13.44	2.252	45.949	0.9217	Medium	13.25
A_CD	863	876	DENSPLGDLLRGVL	14.32	2	11	14.13	14.49	0.213	2.767	0.8832	Medium	14.12	14.49	0.21	2.731	0.891	Medium	14.13	14.49	0.2	2.591	0.8873	Medium	14.13	14.49	0.96	12.474	0.8923	Medium	14.13	14.49	0.954	12.384	0.8618	Medium	14.13	14.49	0.928	12.057	0.8653	Medium	14.13	14.49	2.996	38.911	0.8753	Medium	14.12
A_CD	872	882	LRGVLDVPACQ	9.69	2	8	9.67	9.95	0.097	1.736	0.866	Medium	9.67	9.95	0.107	1.916	0.8752	Medium	9.67	9.95	0.107	1.905	0.8605	Medium	9.67	9.96	0.565	10.09	0.8387	Medium	9.67	9.95	0.582	10.396	0.8454	Medium	9.67	9.96	0.573	10.231	0.8294	Medium	9.66	9.95	1.293	23.096	0.7999	Medium	9.67
A_CD	877	882	DVPACQ	5.3	1	3	5.1	5.66	0.047	2.247	0.9331	High	5.1	5.66	0.045	2.166	0.9368	High	5.1	5.66	0.059	2.799	0.9338	High	5.1	5.67	0.201	9.59	0.9331	High	5.1	5.66	0.192	9.158	0.9249	High	5.1	5.67	0.201	9.591	0.9175	High	5.09	5.66	0.553	26.323	0.9364	High	5.1
A_CD	883	894	IAIRPEGKNNRL	6.19	3	9	5.97	6.52	2.283	36.233	0.9487	High	5.97	6.52	2.23	35.39	0.9312	High	5.97	6.52	2.274	36.095	0.949	High	5.98	6.52	3.386	53.743	0.9505	High	5.97	6.52	3.406	54.065	0.9556	High	5.97	6.51	3.382	53.685	0.9548	High	5.97	6.51	3.825	60.722	0.9347	High	5.97
A_CD	883	896	IAIRPEGKNNRLFV	8.61	4	11	8.77	8.84	1.99	25.849	0.9407	High	8.77	8.84	1.952	25.347	0.9421	High	8.77	8.84	1.986	25.792	0.9443	High	8.77	8.84	3.186	41.379	0.923	High	8.77	8.84	3.228	41.917	0.9236	High	8.77	8.84	3.199	41.548	0.9194	High	8.77	8.83	3.852	50.023	0.9275	High	8.77
A_CD	898	906	SISMPSVAQ	8.93	1	6	8.94	9	1.897	45.177	0.8542	Medium	8.94	9	1.886	44.91	0.8528	Medium	8.94	8.99	1.869	44.491	0.8266	Medium	8.94	9	2.573	61.259	0.8232	Medium	8.94	9	2.546	60.62	0.8049	Medium	8.94	9	2.573	61.259	0.8023	Medium	8.93	8.99	2.84	67.61	0.8302	Medium	8.94
A_CD	898	909	SISMPSVAQWSL	13.51	1	9	13.39	13.81	1.98	31.434	0.8702	Medium	13.39	13.81	1.97	31.274	0.8751	Medium	13.39	13.81	1.972	31.296	0.8682	Medium	13.39	13.81	3.521	55.889	0.8575	Medium	13.39	13.81	3.589	56.962	0.8216	Medium	13.39	13.81	3.523	55.925	0.8438	Medium	13.39	13.81	3.909	62.05	0.8644	Medium	13.39
A_CD	902	909	PSVAQWSL	12.36	1	6	12.11	12.56	1.511	35.982	0.9149	High	12.11	12.55	1.48	35.233	0.9219	High	12.11	12.55	1.51	35.947	0.9171	High	12.12	12.56	3.077	73.266	0.8917	Medium	12.11	12.55	3.1	73.806	0.8748	Medium	12.12	12.56	3.077	73.251	0.8934	High	12.11	12.55	3.142	74.809	0.89	High	12.11
A_CD	910	916	DVAADSQ	3.94	1	5	3.95	4.11	0.565	16.147	0.8779	Medium	3.95	4.11	0.564	16.119	0.8973	Medium	3.95	4.11	0.582	16.635	0.8934	Medium	3.95	4.11	1.152	32.927	0.9054	Medium	3.95	4.11	1.138	32.527	0.8602	Medium	3.95	4.11	1.169	33.41	0.8855	Medium	3.95	4.11	1.511	43.184	0.917	Medium	3.95
A_CD	911	917	VAADSQE	3.88	1	5	3.98	4.05	0.767	21.918	0.7967	Medium	3.98	4.05	0.771	22.016	0.8163	Medium	3.98	4.05	0.776	22.181	0.808	Medium	3.98	4.05	1.671	47.747	0.7905	Medium	3.98	4.05	1.72	49.14	0.7985	Medium	3.99	4.05	1.68	48.004	0.7758	Medium	3.99	4.05	2.041	58.317	0.7609	Medium	3.98
A_CD	917	921	EELQD	5.82	1	3	5.7	6.14	0.032	1.502	0.7858	Medium	5.71	6.14	0.027	1.272	0.8109	Medium	5.7	6.14	0.028	1.323	0.7856	Medium	5.71	6.14	0.033	1.552	0.8336	Medium	5.71	6.14	0.04	1.891	0.8083	Medium	5.71	6.14	0.036	1.732	0.787	Medium	5.7	6.14	0.082	3.886	0.847	Medium	5.7
A_CD	922	928	WVKKIRE	4.93	2	5	4.9	5.28	0.027	0.762	0.957	Medium	4.9	5.29	0.023	0.646	0.9667	Medium	4.9	5.28	0.034	0.976	0.9583	Medium	4.9	5.29	0.037	1.048	0.961	Medium	4.9	5.29	0.043	1.22	0.922	Medium	4.89	5.28	0.044	1.257	0.9067	Medium	4.89	5.28	0.048	1.381	0.9397	Medium	4.9
A_CD	922	934	WVKKIREVAQTAD	6.52	2	11	6.36	6.77	1.633	21.208	0.9444	High	6.36	6.77	1.596	20.722	0.9405	High	6.36	6.77	1.625	21.101	0.9474	High	6.36	6.77	2.613	33.939	0.9257	Medium	6.36	6.77	2.643	34.322	0.9215	Medium	6.35	6.77	2.622	34.048	0.9325	Medium	6.35	6.77	3.149	40.902	0.9244	Medium	6.36
A_CD	922	935	WVKKIREVAQTADA	6.85	2	12	6.88	7.04	2.104	25.047	0.9212	Medium	6.88	7.04	2.078	24.743	0.9249	Medium	6.88	7.04	2.151	25.606	0.9175	Medium	6.97	7.07	2.958	35.219	0.8488	Medium	6.88	7.04	3.123	37.183	0.8685	Medium	6.88	7.04	3.093	36.819	0.8487	Medium	6.88	7.04	3.598	42.833	0.8755	Medium	6.88
A_CD	929	935	VAQTADA	4.03	1	5	4.02	4.19	2.164	61.815	0.8195	Medium	4.02	4.19	2.121	60.6	0.8383	Medium	4.02	4.19	2.111	60.307	0.8151	Medium	4.02	4.2	2.861	81.736	0.8353	Medium	4.02	4.19	2.862	81.783	0.7837	Medium	4.02	4.2	2.824	80.678	0.8153	Medium	4.02	4.2	2.905	83.009	0.851	Medium	4.02
A_CD	929	937	VAQTADARL	6.67	2	7	6.54	6.72	3.491	71.245	0.8428	Medium	6.55	6.72	3.413	69.657	0.8447	Medium	6.54	6.72	3.507	71.566	0.8262	Medium	6.55	6.72	4.187	85.456	0.8606	Medium	6.55	6.72	4.239	86.517	0.8623	Medium	6.54	6.72	4.205	85.813	0.852	Medium	6.54	6.72	4.222	86.163	0.8652	Medium	6.54
A_CD	938	942	TEGKM	3.89	1	3	3.91	4.18	1.68	79.993	0.8818	Medium	3.91	4.19	1.695	80.722	0.8698	Medium	3.91	4.18	1.709	81.399	0.8845	Medium	3.91	4.19	1.702	81.06	0.8762	Medium	3.91	4.19	1.726	82.192	0.8656	Medium	3.91	4.19	1.72	81.913	0.8782	Medium	3.91	4.19	1.662	79.139	0.8818	Medium	3.91
A_CD	938	953	TEGKMMERRKKIALEL	7.43	4	14	7.48	7.56	3.129	31.926	0.8896	Medium	7.49	7.56	3.08	31.425	0.8942	Medium	7.48	7.56	3.147	32.117	0.8843	Medium	7.49	7.56	4.049	41.315	0.9142	Medium	7.49	7.56	4.136	42.203	0.9034	Medium	7.49	7.56	4.089	41.725	0.8966	Medium	7.48	7.56	4.346	44.345	0.9252	Medium	7.49
A_CD	943	951	MERRKKIAL	4.84	2	7	4.86	5.18	2.032	41.466	0.9314	Medium	4.86	5.18	2.004	40.907	0.9441	Medium	4.86	5.18	2.039	41.612	0.9127	Medium	4.86	5.19	2.597	52.997	0.9254	Medium	4.86	5.18	2.661	54.305	0.8947	Medium	4.86	5.18	2.619	53.449	0.9203	Medium	4.85	5.18	2.655	54.18	0.9345	Medium	4.86
A_CD	945	953	RRKKIALEL	7.11	3	7	7.06	7.34	1.136	23.174	0.8592	Medium	7.07	7.34	1.129	23.032	0.8662	Medium	7.06	7.34	1.152	23.515	0.8774	Medium	7.07	7.35	2.14	43.684	0.8563	Medium	7.07	7.34	2.133	43.528	0.8526	Medium	7.06	7.35	2.161	44.099	0.8805	Medium	7.06	7.34	2.321	47.361	0.9115	Medium	7.07
A_CD	957	968	VVYCRPVPFDEE	10.06	2	8	9.78	10.25	0.974	17.388	0.859	Medium	9.78	10.26	0.944	16.852	0.839	Medium	9.78	10.25	1.003	17.919	0.8613	Medium	9.78	10.26	1.362	24.322	0.8355	Medium	9.78	10.26	1.376	24.574	0.8533	Medium	9.78	10.26	1.34	23.936	0.8478	Medium	9.77	10.25	1.59	28.386	0.8468	Medium	9.78
A_CD	957	976	VVYCRPVPFDEEKIGTERAC	9.15	3	16	9.17	9.27	2.57	22.948	0.9241	High	9.17	9.27	2.543	22.705	0.9342	High	9.17	9.27	2.578	23.018	0.9289	High	9.18	9.28	4.363	38.958	0.8937	Medium	9.17	9.27	4.378	39.09	0.8942	Medium	9.18	9.28	4.34	38.746	0.9023	Medium	9.17	9.27	5.351	47.773	0.8938	Medium	9.17
A_CD	959	967	YCRPVPFDE	9.14	2	5	9	9.1	0.925	26.421	0.9078	Medium	9	9.11	0.935	26.703	0.8947	Medium	9	9.1	0.948	27.076	0.8785	Medium	9.01	9.11	1.018	29.082	0.9265	Medium	9	9.11	1.036	29.612	0.9092	Medium	9.01	9.11	1.045	29.852	0.9029	Medium	9	9.1	1.118	31.955	0.9266	Medium	9
A_CD	968	976	EKIGTERAC	4.72	2	7	4.81	4.85	1.993	40.674	0.9274	Medium	4.81	4.85	1.995	40.705	0.9281	Medium	4.81	4.85	1.984	40.48	0.9276	Medium	4.81	4.85	3.365	68.669	0.9231	High	4.81	4.85	3.382	69.027	0.9232	Medium	4.81	4.85	3.375	68.876	0.9334	Medium	4.8	4.84	3.686	75.223	0.9298	High	4.81
A_CD	977	1003	YRDMSSFPETKAEKYVNKAKGKKFLQY	8.44	5	24	8.11	8.81	1.081	6.436	0.9199	High	8.11	8.81	1.042	6.203	0.9176	High	8.11	8.81	1.081	6.432	0.9206	High	8.11	8.82	2.724	16.215	0.9117	High	8.11	8.81	2.797	16.648	0.9143	High	8.11	8.82	2.735	16.277	0.914	High	8.1	8.81	4.31	25.653	0.8969	Medium	8.11
A_CD	978	983	RDMSSF	7.96	1	4	7.93	8.02	0.307	10.949	0.7325	Medium	7.93	8.02	0.301	10.768	0.7449	Medium	7.93	8.02	0.289	10.315	0.7184	Medium	7.93	8.03	0.52	18.586	0.7942	Medium	7.93	8.02	0.526	18.795	0.7403	Medium	7.93	8.03	0.545	19.477	0.7586	Medium	7.93	8.02	0.614	21.933	0.7945	Medium	7.93
A_CD	978	1008	RDMSSFPETKAEKYVNKAKGKKFLQYNRLQL	8.77	4	28	8.58	9.11	0.993	5.066	0.9513	High	8.59	9.11	0.928	4.732	0.9609	High	8.58	9.11	0.978	4.989	0.949	High	8.59	9.12	2.422	12.357	0.9513	High	8.58	9.11	2.48	12.651	0.932	High	8.59	9.12	2.448	12.49	0.9451	High	8.58	9.11	3.767	19.217	0.9485	High	8.58
A_CD	984	1008	PETKAEKYVNKAKGKKFLQYNRLQL	8.01	4	23	7.95	8.06	0.811	5.035	0.9032	High	7.96	8.06	0.908	5.641	0.8923	High	7.95	8.05	0.808	5.017	0.8924	High	7.96	8.06	1.96	12.175	0.9259	High	7.96	8.06	2.003	12.441	0.9174	High	7.96	8.06	1.999	12.414	0.9225	High	7.95	8.05	3.291	20.444	0.9291	High	7.96
A_CD	987	1003	KAEKYVNKAKGKKFLQY	5.89	4	15	5.91	6.02	0.436	4.148	0.8863	Medium	5.92	6.02	0.417	3.973	0.9074	Medium	5.91	6.02	0.534	5.09	0.8872	Medium	5.92	6.03	1.316	12.531	0.882	Medium	5.92	6.02	1.369	13.036	0.8847	Medium	5.92	6.02	1.346	12.817	0.8655	Medium	5.91	6.02	2.149	20.465	0.8988	Medium	5.91
A_CD	1009	1018	SRIYPKGQRL	5.55	3	7	5.47	6.02	0.753	15.369	0.9505	High	5.47	6.02	0.702	14.336	0.9608	High	5.47	6.02	0.728	14.859	0.9602	High	5.47	6.03	1.353	27.609	0.9579	High	5.47	6.02	1.372	28.006	0.955	High	5.46	6.02	1.346	27.467	0.9587	High	5.46	6.02	2.138	43.638	0.9579	High	5.47
A_CD	1009	1022	SRIYPKGQRLDSSN	5.04	3	11	5.04	5.17	0.903	11.726	0.9386	Medium	5.04	5.17	0.863	11.207	0.9165	Medium	5.04	5.17	0.912	11.847	0.9272	Medium	5.04	5.17	1.709	22.192	0.9379	Medium	5.04	5.17	1.758	22.832	0.9362	Medium	5.04	5.16	1.688	21.927	0.9326	Medium	5.04	5.16	3.102	40.284	0.9323	Medium	5.04
A_CD	1009	1029	SRIYPKGQRLDSSNYDPLPMW	11.46	4	16	11.2	11.89	0.5	4.461	0.9042	High	11.2	11.89	0.459	4.096	0.9045	High	11.2	11.89	0.496	4.429	0.9095	High	11.21	11.9	1.01	9.021	0.8969	High	11.2	11.89	1.036	9.254	0.9053	High	11.21	11.9	1.015	9.061	0.9074	High	11.2	11.89	1.882	16.808	0.9002	High	11.2
A_CD	1009	1032	SRIYPKGQRLDSSNYDPLPMWICG	12.63	4	19	12.39	12.89	0.384	2.886	0.8884	Medium	12.38	12.88	0.393	2.957	0.898	High	12.38	12.89	0.425	3.194	0.8708	Medium	12.38	12.89	0.876	6.588	0.8705	Medium	12.38	12.88	0.958	7.203	0.8239	Medium	12.38	12.89	0.898	6.75	0.8543	Medium	12.39	12.89	1.623	12.205	0.8243	Medium	12.38
A_CD	1009	1035	SRIYPKGQRLDSSNYDPLPMWICGSQL	13.04	3	22	12.74	13.34	0.398	2.582	0.9561	High	12.73	13.34	0.393	2.55	0.9465	High	12.74	13.34	0.403	2.616	0.955	High	12.74	13.34	0.857	5.567	0.9557	High	12.73	13.34	0.871	5.654	0.9495	High	12.74	13.34	0.839	5.451	0.9545	High	12.73	13.34	1.52	9.87	0.9535	High	12.73
A_CD	1012	1018	YPKGQRL	5.61	2	5	5.6	5.73	0.588	16.793	0.8112	Medium	5.6	5.73	0.597	17.051	0.8037	Medium	5.6	5.73	0.673	19.226	0.8336	Medium	5.61	5.73	1.15	32.862	0.7914	Medium	5.6	5.73	1.187	33.922	0.7938	Medium	5.61	5.73	1.123	32.091	0.7924	Medium	5.6	5.72	1.829	52.246	0.7806	Medium	5.6
A_CD	1019	1028	DSSNYDPLPM	11.16	1	6	11.12	11.35	0.051	1.203	0.8396	Medium	11.12	11.35	0.058	1.377	0.849	Medium	11.12	11.35	0.09	2.142	0.8356	Medium	11.12	11.36	0.07	1.658	0.8587	Medium	11.12	11.35	0.161	3.832	0.7785	Medium	11.13	11.36	0.107	2.555	0.8308	Medium	11.12	11.35	0.207	4.923	0.8515	Medium	11.12
A_CD	1019	1029	DSSNYDPLPMW	14.02	1	7	13.9	14.25	0.049	1	0.9212	High	13.9	14.24	0.047	0.957	0.9141	Medium	13.9	14.25	0.043	0.888	0.9226	High	13.9	14.25	0.05	1.019	0.9232	High	13.9	14.25	0.051	1.044	0.9025	Medium	13.9	14.25	0.039	0.79	0.9007	Medium	13.91	14.25	0.134	2.726	0.9192	High	13.9
A_CD	1029	1035	WICGSQL	11.9	1	5	11.84	11.93	0.061	1.757	0.8487	Medium	11.84	11.93	0.045	1.276	0.837	Medium	11.84	11.93	0.071	2.028	0.8215	Medium	11.85	11.94	0.059	1.677	0.8532	Medium	11.84	11.93	0.049	1.398	0.8026	Medium	11.85	11.94	0.065	1.846	0.8198	Medium	11.84	11.93	0.062	1.77	0.8396	Medium	11.84
A_CD	1030	1035	ICGSQL	8.33	1	4	8.33	8.53	0.023	0.827	0.8443	Medium	8.33	8.53	0.042	1.489	0.8462	Medium	8.33	8.53	0.041	1.478	0.8438	Medium	8.34	8.53	0.042	1.483	0.8247	Medium	8.33	8.53	0.039	1.382	0.826	Medium	8.34	8.53	0.026	0.94	0.8254	Medium	8.33	8.52	0.037	1.309	0.8402	Medium	8.33
A_CD	1036	1049	VALNFQTPDKPMQM	10.61	2	10	10.35	10.95	0.263	3.751	0.9444	High	10.35	10.95	0.233	3.334	0.9478	High	10.35	10.95	0.241	3.448	0.9415	High	10.35	10.96	0.542	7.737	0.9497	High	10.35	10.95	0.55	7.852	0.9504	High	10.35	10.96	0.566	8.082	0.9347	High	10.34	10.95	0.546	7.801	0.9483	High	10.35
A_CD	1039	1049	NFQTPDKPMQM	9.19	2	7	9.2	9.4	0.256	5.225	0.8981	High	9.2	9.4	0.238	4.859	0.8922	High	9.2	9.4	0.259	5.283	0.8964	High	9.2	9.4	0.558	11.381	0.8804	High	9.2	9.4	0.567	11.571	0.9044	High	9.2	9.4	0.56	11.421	0.8798	High	9.19	9.4	0.577	11.781	0.8932	High	9.2
A_CD	1050	1054	NQALF	10.82	1	3	10.73	10.98	0.036	1.725	0.8664	Medium	10.73	10.99	0.018	0.848	0.8661	Medium	10.73	10.98	0.032	1.514	0.8693	Medium	10.74	10.99	0.035	1.666	0.8424	Medium	10.73	10.99	0.029	1.397	0.8581	Medium	10.74	10.99	0.041	1.971	0.8596	Medium	10.73	10.98	0.03	1.409	0.8541	Medium	10.73
A_CD	1054	1068	FMAGGHCGYVLQPST	9.52	2	12	9.47	9.66	1.106	13.167	0.8799	Medium	9.47	9.66	1.081	12.863	0.8852	Medium	9.47	9.66	1.139	13.56	0.8839	Medium	9.48	9.66	1.241	14.772	0.8506	Medium	9.47	9.66	1.419	16.898	0.8695	Medium	9.48	9.66	1.386	16.5	0.856	Medium	9.47	9.66	2.07	24.649	0.8614	Medium	9.47
A_CD	1055	1062	MAGGHCGY	6.2	1	6	6.1	6.38	0.113	2.697	0.8388	Medium	6.1	6.38	0.091	2.159	0.8529	Medium	6.1	6.38	0.104	2.484	0.8489	Medium	6.1	6.38	0.187	4.448	0.8613	Medium	6.1	6.38	0.185	4.399	0.8265	Medium	6.09	6.37	0.221	5.269	0.8329	Medium	6.09	6.37	0.741	17.636	0.8375	Medium	6.1
A_CD	1055	1068	MAGGHCGYVLQPST	8.45	2	11	8.38	8.53	1.276	16.574	0.7491	Medium	8.38	8.53	1.288	16.729	0.7457	Medium	8.38	8.53	1.287	16.712	0.7235	Medium	8.39	8.53	1.386	17.997	0.7807	Medium	8.38	8.53	1.39	18.047	0.7396	Medium	8.39	8.53	1.408	18.29	0.738	Medium	8.38	8.52	1.767	22.952	0.7786	Medium	8.38
A_CD	1063	1068	VLQPST	5.66	1	3	5.59	5.69	1.255	59.751	0.8172	Medium	5.59	5.69	1.203	57.281	0.8152	Medium	5.59	5.69	1.287	61.305	0.8343	Medium	5.59	5.69	1.296	61.693	0.8601	Medium	5.59	5.69	1.289	61.382	0.8244	Medium	5.58	5.69	1.319	62.805	0.8265	Medium	5.58	5.68	1.26	60.014	0.8119	Medium	5.59
A_CD	1063	1069	VLQPSTM	7.96	1	4	7.79	8.2	1.216	43.425	0.8766	Medium	7.79	8.2	1.196	42.713	0.8809	Medium	7.79	8.2	1.237	44.189	0.885	Medium	7.87	8.02	1.305	46.591	0.8986	Medium	7.79	8.2	1.249	44.607	0.8726	Medium	7.79	8.2	1.246	44.49	0.8735	Medium	7.78	8.19	1.242	44.345	0.8899	Medium	7.79
A_CD	1063	1082	VLQPSTMRDEAFDPFDKSSL	11.57	3	16	11.33	11.83	1.48	13.217	0.9072	Medium	11.33	11.83	1.479	13.205	0.9068	Medium	11.33	11.83	1.495	13.351	0.9139	Medium	11.33	11.84	2.582	23.055	0.8974	Medium	11.33	11.83	2.574	22.983	0.9028	Medium	11.34	11.84	2.559	22.853	0.8948	Medium	11.33	11.83	2.87	25.622	0.9078	Medium	11.33
A_CD	1069	1082	MRDEAFDPFDKSSL	11.2	3	11	10.98	11.34	0.701	9.102	0.9431	High	10.99	11.34	0.69	8.961	0.942	High	10.98	11.34	0.706	9.166	0.9423	High	10.99	11.34	1.652	21.455	0.9348	High	10.99	11.34	1.7	22.081	0.9286	High	10.99	11.34	1.673	21.733	0.9332	High	10.98	11.34	1.993	25.885	0.9178	High	10.99
A_CD	1070	1082	RDEAFDPFDKSSL	10.93	2	10	10.72	11.14	0.635	9.07	0.9469	High	10.73	11.14	0.639	9.129	0.939	High	10.72	11.14	0.655	9.35	0.9416	High	10.73	11.15	1.574	22.489	0.9409	High	10.73	11.14	1.596	22.8	0.9403	High	10.73	11.15	1.579	22.551	0.9387	High	10.72	11.14	1.889	26.988	0.9404	High	10.73
A_CD	1083	1090	RGLEPCVI	10.13	1	5	10.04	10.19	0.427	12.204	0.8745	Medium	10.05	10.19	0.419	11.979	0.8706	Medium	10.04	10.19	0.405	11.568	0.8511	Medium	10.04	10.14	1.116	31.888	0.8738	Medium	10.05	10.19	1.115	31.867	0.8411	Medium	10.05	10.19	1.112	31.771	0.8326	Medium	10.04	10.19	1.159	33.127	0.8665	Medium	10.05
A_CD	1083	1091	RGLEPCVIC	10.28	2	6	10.14	10.49	0.414	9.859	0.9094	High	10.14	10.49	0.42	10.001	0.9088	High	10.14	10.49	0.418	9.943	0.9073	High	10.14	10.5	1.123	26.749	0.905	Medium	10.14	10.49	1.12	26.656	0.9059	Medium	10.14	10.5	1.099	26.173	0.9047	Medium	10.14	10.49	1.151	27.407	0.9042	Medium	10.14
A_CD	1092	1106	IEVLGARHLPKNGRG	6.2	4	12	6.09	6.28	1.042	12.408	0.887	Medium	6.09	6.28	0.981	11.682	0.9049	Medium	6.09	6.28	1.008	11.998	0.9086	Medium	6.09	6.28	1.624	19.328	0.9096	Medium	6.09	6.28	1.593	18.969	0.9054	Medium	6.09	6.27	1.645	19.579	0.9132	Medium	6.09	6.27	1.963	23.368	0.9164	Medium	6.09
A_CD	1092	1109	IEVLGARHLPKNGRGIVC	7.9	4	15	7.93	8.02	0.959	9.133	0.9246	High	7.93	8.02	0.987	9.402	0.9204	High	7.93	8.02	0.98	9.334	0.9164	High	7.93	8.03	1.551	14.767	0.9176	High	7.93	8.02	1.609	15.321	0.9302	High	7.93	8.03	1.594	15.185	0.9292	High	7.93	8.02	2.211	21.054	0.9309	High	7.93
A_CD	1092	1115	IEVLGARHLPKNGRGIVCPFVEIE	10.78	5	20	10.92	11.02	0.695	4.965	0.9292	High	10.92	11.02	0.671	4.796	0.934	High	10.92	11.02	0.728	5.202	0.9292	High	10.92	11.02	1.036	7.398	0.9164	High	10.92	11.02	1.062	7.583	0.913	High	10.92	11.02	1.07	7.643	0.9146	High	10.92	11.02	1.456	10.399	0.9171	High	10.92
A_CD	1110	1115	PFVEIE	10.67	1	4	10.69	10.75	0.025	0.889	0.8297	Medium	10.69	10.75	0.032	1.135	0.8267	Medium	10.69	10.75	0.059	2.107	0.8359	Medium	10.7	10.76	0.046	1.647	0.8225	Medium	10.69	10.75	0.052	1.874	0.77	Medium	10.7	10.76	0.047	1.674	0.7614	Medium	10.69	10.75	0.045	1.624	0.7985	Medium	10.69
A_CD	1114	1120	IEVAGAE	6.46	1	5	6.41	6.67	0.26	7.436	0.9116	Medium	6.41	6.67	0.299	8.532	0.8917	Medium	6.41	6.67	0.254	7.267	0.9122	Medium	6.41	6.67	0.56	15.997	0.9179	Medium	6.41	6.67	0.564	16.102	0.9139	Medium	6.41	6.67	0.57	16.295	0.9161	Medium	6.41	6.67	0.65	18.579	0.9108	Medium	6.41
A_CD	1114	1121	IEVAGAEY	9.14	1	6	9.14	9.21	0.294	6.996	0.9144	High	9.14	9.21	0.294	7.002	0.9243	High	9.14	9.2	0.326	7.759	0.8989	High	9.14	9.21	0.943	22.442	0.9299	High	9.14	9.21	0.962	22.901	0.9181	High	9.14	9.21	0.944	22.47	0.9155	High	9.14	9.2	1.23	29.295	0.9171	High	9.14
A_CD	1114	1130	IEVAGAEYDSTKQKTEF	8.6	3	15	8.64	8.94	0.548	5.215	0.9511	High	8.64	8.94	0.508	4.835	0.9482	High	8.64	8.94	0.556	5.293	0.9466	High	8.65	8.94	1.976	18.821	0.9393	High	8.64	8.94	2.028	19.318	0.9407	High	8.65	8.94	1.994	18.989	0.9394	High	8.64	8.93	3.292	31.351	0.9325	High	8.64
A_CD	1122	1130	DSTKQKTEF	6.08	2	7	6.02	6.17	0.299	6.11	0.89	High	6.02	6.17	0.293	5.985	0.9419	High	6.02	6.17	0.286	5.827	0.9198	Medium	6.02	6.17	1.203	24.551	0.9181	High	6.02	6.17	1.244	25.397	0.918	Medium	6.01	6.16	1.205	24.596	0.9256	Medium	6.01	6.16	2.222	45.355	0.9045	High	6.02
A_CD	1131	1137	VVDNGLN	5.92	1	5	5.94	6.07	0.061	1.744	0.9222	High	5.94	6.07	0.061	1.75	0.8943	High	5.94	6.07	0.068	1.933	0.9247	High	5.94	6.07	0.066	1.885	0.9153	High	5.94	6.07	0.058	1.659	0.9265	High	5.94	6.06	0.074	2.124	0.9211	High	5.93	6.06	0.093	2.66	0.9149	High	5.94
A_CD	1131	1154	VVDNGLNPVWPAKPFHFQISNPEF	12.65	2	18	12.67	12.82	0.475	3.767	0.8853	Medium	12.66	12.82	0.502	3.984	0.8795	High	12.66	12.82	0.474	3.762	0.8709	High	12.67	12.82	1.186	9.412	0.8783	Medium	12.66	12.81	1.158	9.19	0.8439	Medium	12.67	12.82	1.105	8.771	0.8835	Medium	12.66	12.82	1.617	12.831	0.8718	Medium	12.66
A_CD	1131	1155	VVDNGLNPVWPAKPFHFQISNPEFA	12.47	3	19	12.26	12.4	0.549	4.129	0.8122	Medium	12.26	12.4	0.484	3.642	0.8027	Medium	12.26	12.39	0.506	3.807	0.7881	Medium	12.27	12.4	1.156	8.69	0.8145	Medium	12.26	12.4	1.202	9.04	0.8277	Medium	12.27	12.4	1.178	8.861	0.785	Medium	12.27	12.4	1.69	12.708	0.839	Medium	12.26
A_CD	1131	1156	VVDNGLNPVWPAKPFHFQISNPEFAF	13.64	3	20	13.2	13.82	0.53	3.784	0.9235	High	13.19	13.81	0.46	3.288	0.9132	High	13.2	13.82	0.482	3.442	0.9064	High	13.2	13.82	1.158	8.272	0.9157	High	13.19	13.81	1.173	8.381	0.9045	High	13.2	13.82	1.144	8.168	0.9117	High	13.2	13.82	1.665	11.89	0.922	High	13.19
A_CD	1138	1147	PVWPAKPFHF	11.46	3	6	11.38	11.56	0.444	10.56	0.9244	High	11.38	11.56	0.432	10.287	0.927	High	11.38	11.56	0.451	10.727	0.929	High	11.39	11.57	0.831	19.789	0.9264	High	11.38	11.56	0.837	19.938	0.9326	High	11.39	11.57	0.866	20.626	0.9153	High	11.38	11.56	1.215	28.922	0.9222	High	11.38
A_CD	1138	1154	PVWPAKPFHFQISNPEF	12.2	3	12	12.17	12.28	0.496	5.904	0.9543	High	12.17	12.28	0.489	5.824	0.9492	High	12.17	12.28	0.523	6.225	0.9434	High	12.17	12.28	1.148	13.666	0.9563	High	12.17	12.28	1.168	13.908	0.9527	High	12.17	12.28	1.142	13.594	0.9563	High	12.18	12.28	1.648	19.62	0.9536	High	12.17
A_CD	1138	1156	PVWPAKPFHFQISNPEFAF	13.14	3	14	12.95	13.53	0.472	4.814	0.9458	High	12.94	13.52	0.444	4.528	0.9527	High	12.95	13.53	0.468	4.776	0.9419	High	12.95	13.53	1.119	11.416	0.9425	High	12.94	13.52	1.13	11.53	0.9228	Medium	12.95	13.53	1.116	11.391	0.9387	High	12.95	13.53	1.616	16.492	0.9436	High	12.94
A_CD	1148	1154	QISNPEF	9.46	1	4	9.31	9.79	0.047	1.691	0.9127	High	9.31	9.79	0.043	1.55	0.9099	High	9.31	9.79	0.057	2.018	0.9062	High	9.31	9.8	0.089	3.192	0.9061	High	9.31	9.79	0.077	2.767	0.8838	High	9.31	9.8	0.128	4.579	0.8818	Medium	9.3	9.79	0.32	11.413	0.909	High	9.31
A_CD	1148	1155	QISNPEFA	8.93	1	5	8.78	8.89	0.06	1.712	0.865	Medium	8.78	8.89	0.045	1.284	0.8656	Medium	8.78	8.89	0.075	2.139	0.8539	Medium	8.78	8.89	0.056	1.601	0.8707	Medium	8.78	8.89	0.091	2.603	0.8352	Medium	8.78	8.89	0.08	2.29	0.8456	Medium	8.77	8.88	0.31	8.843	0.8588	Medium	8.78
A_CD	1148	1156	QISNPEFAF	12.3	1	6	12.16	12.67	0.038	0.902	0.924	High	12.16	12.66	0.047	1.128	0.9228	High	12.16	12.66	0.046	1.088	0.9359	High	12.17	12.67	0.065	1.549	0.9224	High	12.16	12.66	0.065	1.556	0.901	High	12.17	12.67	0.076	1.81	0.9064	High	12.16	12.66	0.292	6.952	0.8966	High	12.16
A_CD	1158	1166	RFVVYEEDM	10.23	2	7	10.18	10.33	0.184	3.756	0.7874	Medium	10.18	10.33	0.19	3.876	0.7784	Medium	10.18	10.33	0.18	3.675	0.7524	Medium	10.18	10.34	0.549	11.212	0.7967	Medium	10.18	10.33	0.543	11.09	0.783	Medium	10.18	10.34	0.558	11.386	0.757	Medium	10.18	10.33	0.583	11.89	0.7692	Medium	10.18
A_CD	1160	1166	VVYEEDM	8.78	1	5	8.77	8.89	0.227	6.495	0.9219	High	8.77	8.89	0.215	6.153	0.928	High	8.77	8.89	0.24	6.848	0.9342	High	8.77	8.89	0.6	17.132	0.9285	High	8.77	8.89	0.607	17.344	0.9259	High	8.77	8.89	0.587	16.765	0.9257	High	8.77	8.88	0.608	17.372	0.9298	High	8.77
A_CD	1167	1172	FSDQNF	9.57	1	4	9.42	9.83	0.653	23.305	0.9144	Medium	9.42	9.84	0.655	23.383	0.9243	Medium	9.41	9.83	0.655	23.379	0.929	Medium	9.42	9.84	0.865	30.878	0.9189	Medium	9.42	9.84	0.875	31.252	0.9046	Medium	9.42	9.84	0.858	30.651	0.8962	Medium	9.41	9.83	1.224	43.699	0.9061	Medium	9.42
A_CD	1167	1199	FSDQNFLAQATFPVKGLKTGYRAVPLKNNYSED	10.72	5	29	10.56	10.67	0.75	3.695	0.8483	Medium	10.56	10.67	0.776	3.823	0.8542	Medium	10.56	10.67	0.823	4.053	0.8702	Medium	10.56	10.68	1.407	6.932	0.9033	Medium	10.56	10.67	1.407	6.933	0.9159	Medium	10.56	10.68	1.394	6.869	0.8928	Medium	10.56	10.67	2.319	11.425	0.8968	Medium	10.56
A_CD	1173	1178	LAQATF	9.08	1	4	9.05	9.19	0.054	1.94	0.9029	Medium	9.05	9.19	0.029	1.042	0.9003	Medium	9.05	9.19	0.062	2.199	0.8993	Medium	9.05	9.19	0.066	2.363	0.9028	Medium	9.05	9.19	0.061	2.181	0.8984	Medium	9.05	9.19	0.078	2.803	0.8947	Medium	9.04	9.19	0.246	8.78	0.9015	Medium	9.05
A_CD	1173	1196	LAQATFPVKGLKTGYRAVPLKNNY	8.62	4	20	8.61	8.76	0.124	0.888	0.848	Medium	8.61	8.76	0.15	1.068	0.8699	Medium	8.61	8.76	0.12	0.859	0.8413	Medium	8.61	8.76	0.721	5.153	0.8749	Medium	8.61	8.76	0.717	5.118	0.8526	Medium	8.61	8.76	0.703	5.025	0.8516	Medium	8.61	8.76	1.289	9.205	0.8614	Medium	8.61
A_CD	1173	1199	LAQATFPVKGLKTGYRAVPLKNNYSED	8.55	5	23	8.37	9.06	0.15	0.931	0.9378	High	8.37	9.06	0.145	0.899	0.9407	High	8.37	9.06	0.163	1.012	0.9397	High	8.37	9.07	0.641	3.981	0.9391	High	8.37	9.06	0.657	4.083	0.9481	High	8.37	9.07	0.655	4.066	0.9448	High	8.36	9.06	1.407	8.742	0.9426	High	8.37
A_CD	1174	1199	AQATFPVKGLKTGYRAVPLKNNYSED	8.18	4	22	8.14	8.24	0.228	1.484	0.8857	High	8.14	8.24	0.177	1.152	0.8897	High	8.14	8.24	0.247	1.606	0.8518	Medium	8.14	8.24	0.732	4.755	0.8786	High	8.14	8.24	0.773	5.018	0.8486	Medium	8.14	8.24	0.763	4.957	0.847	Medium	8.14	8.24	1.474	9.571	0.8866	High	8.14
A_CD	1176	1199	ATFPVKGLKTGYRAVPLKNNYSED	8.12	4	20	8	8.11	0.257	1.838	0.8852	High	8	8.12	0.283	2.024	0.8774	High	8	8.11	0.254	1.817	0.8792	High	8	8.12	0.696	4.973	0.8929	High	8	8.11	0.744	5.316	0.8782	High	8	8.12	0.736	5.26	0.8633	Medium	7.99	8.11	1.297	9.262	0.8659	Medium	8
A_CD	1179	1187	PVKGLKTGY	6.03	2	7	6.05	6.22	0.103	2.104	0.9227	Medium	6.05	6.22	0.09	1.833	0.9273	Medium	6.05	6.22	0.102	2.085	0.9096	Medium	6.05	6.22	0.586	11.968	0.8526	Medium	6.05	6.22	0.531	10.836	0.8754	Medium	6.04	6.21	0.525	10.722	0.8903	Medium	6.04	6.21	1.109	22.626	0.882	Medium	6.05
A_CD	1179	1196	PVKGLKTGYRAVPLKNNY	6.81	4	15	6.74	6.81	0.131	1.245	0.789	Medium	6.74	6.81	0.081	0.771	0.7978	Medium	6.74	6.81	0.045	0.428	0.6988	Medium	6.74	6.82	0.65	6.189	0.899	Medium	6.74	6.81	0.643	6.12	0.8226	Medium	6.73	6.81	0.637	6.069	0.8045	Medium	6.73	6.81	1.141	10.867	0.8601	Medium	6.74
A_CD	1188	1199	RAVPLKNNYSED	5.77	3	9	5.63	6.07	0.13	2.064	0.9569	High	5.63	6.07	0.101	1.599	0.9541	High	5.63	6.07	0.105	1.662	0.9599	High	5.63	6.08	0.444	7.05	0.9452	High	5.63	6.07	0.453	7.192	0.9408	High	5.63	6.07	0.472	7.498	0.9493	High	5.62	6.07	0.712	11.303	0.9508	High	5.63
B_CD + FGFR	26	33	CRSLEVGT	6.68	2	6	6.55	6.93	0.469	11.176	0.8107	Medium	6.55	6.93	0.49	11.677	0.8315	Medium	6.55	6.93	0.463	11.022	0.8136	Medium	6.56	6.93	1.092	26.008	0.8281	Medium	6.55	6.93	1.115	26.542	0.8171	Medium	6.55	6.93	1.077	25.632	0.8233	Medium	6.55	6.93	2.421	57.653	0.7904	Medium	6.55
B_CD + FGFR	26	35	CRSLEVGTVM	9.41	2	8	9.29	9.35	0.442	7.895	0.8617	Medium	9.3	9.35	0.414	7.397	0.8725	Medium	9.3	9.35	0.407	7.268	0.8766	Medium	9.3	9.35	1.396	24.927	0.8524	Medium	9.3	9.35	1.371	24.49	0.8746	Medium	9.29	9.35	1.332	23.777	0.8424	Medium	9.3	9.35	2.974	53.1	0.8543	Medium	9.3
B_CD + FGFR	33	37	TVMTL	10.28	1	3	10.21	10.24	0.085	4.053	0.8469	Medium	10.2	10.24	0.082	3.908	0.8372	Medium	10.2	10.24	0.078	3.696	0.8445	Medium	10.21	10.24	0.079	3.756	0.8458	Medium	10.2	10.24	0.076	3.631	0.8422	Medium	10.21	10.24	0.083	3.966	0.8154	Medium	10.21	10.24	0.08	3.826	0.8489	Medium	10.2
B_CD + FGFR	37	54	LFYSKKSQRPERKTFQVK	6.62	5	15	6.54	7	0.804	7.656	0.9294	Medium	6.54	7	0.766	7.297	0.9259	High	6.54	7	0.737	7.016	0.9314	High	6.55	7	1.656	15.774	0.9269	High	6.54	7	1.65	15.712	0.9303	High	6.54	6.99	1.628	15.501	0.9365	High	6.55	7	1.987	18.921	0.9416	High	6.54
B_CD + FGFR	38	52	FYSKKSQRPERKTFQ	4.22	3	12	4.22	4.68	1.402	16.686	0.9574	High	4.23	4.68	1.377	16.387	0.9566	High	4.23	4.68	1.3	15.476	0.954	High	4.23	4.68	2.11	25.114	0.9591	High	4.23	4.68	2.117	25.206	0.9624	High	4.23	4.67	2.08	24.766	0.9575	High	4.23	4.68	2.52	29.995	0.957	High	4.23
B_CD + FGFR	38	55	FYSKKSQRPERKTFQVKL	6.68	4	15	6.53	7.03	0.774	7.371	0.9357	Medium	6.53	7.03	0.773	7.359	0.9136	Medium	6.53	7.03	0.725	6.904	0.9284	Medium	6.53	7.03	1.662	15.83	0.901	Medium	6.53	7.03	1.621	15.441	0.9161	Medium	6.52	7.03	1.632	15.539	0.9003	Medium	6.53	7.03	1.994	18.992	0.9095	Medium	6.53
B_CD + FGFR	53	57	VKLET	5.86	1	3	5.89	5.98	0.793	37.763	0.9325	Medium	5.89	5.98	0.822	39.155	0.922	Medium	5.89	5.98	0.787	37.454	0.9075	Medium	5.89	5.98	1.76	83.833	0.9225	Medium	5.89	5.98	1.745	83.104	0.9354	Medium	5.88	5.98	1.755	83.578	0.9222	Medium	5.89	5.98	1.897	90.353	0.9121	Medium	5.89
B_CD + FGFR	56	74	ETRQITWSRGADKIEGSID	8.66	4	17	8.61	9.03	2.205	18.533	0.8799	Medium	8.61	9.04	2.207	18.545	0.8856	Medium	8.61	9.04	2.139	17.978	0.8748	Medium	8.61	9.04	3.503	29.438	0.8983	Medium	8.61	9.04	3.508	29.479	0.8868	Medium	8.61	9.03	3.45	28.988	0.8977	Medium	8.61	9.04	4.827	40.567	0.8793	Medium	8.61
B_CD + FGFR	58	74	RQITWSRGADKIEGSID	8.44	2	15	8.25	8.71	2.086	19.871	0.9062	High	8.25	8.71	2.076	19.771	0.9044	High	8.25	8.71	1.996	19.006	0.9096	High	8.25	8.71	3.363	32.025	0.8833	High	8.25	8.71	3.348	31.889	0.8857	High	8.24	8.71	3.28	31.241	0.8845	High	8.25	8.71	4.676	44.53	0.884	High	8.25
B_CD + FGFR	75	89	IREIKEIRPGKTSRD	4.77	4	12	4.7	5.2	0.668	7.953	0.936	High	4.71	5.2	0.644	7.665	0.9539	High	4.71	5.2	0.615	7.325	0.9443	High	4.7	5.2	1.54	18.328	0.954	High	4.71	5.2	1.533	18.245	0.9369	High	4.7	5.2	1.505	17.922	0.9448	High	4.71	5.2	1.985	23.631	0.955	High	4.71
B_CD + FGFR	75	107	IREIKEIRPGKTSRDFDRYQEDPAFRPDQSHCF	8.23	5	28	8.01	8.56	2.653	13.534	0.8994	High	8.01	8.56	2.708	13.815	0.8921	High	8.01	8.56	2.549	13.004	0.9018	High	8.01	8.56	4.761	24.289	0.891	High	8.01	8.56	4.697	23.966	0.8881	High	8.02	8.56	4.66	23.774	0.8882	High	8.02	8.56	5.556	28.345	0.8879	High	8.01
B_CD + FGFR	78	89	IKEIRPGKTSRD	3.88	4	9	3.83	4.41	0.697	11.063	0.9536	High	3.83	4.41	0.66	10.478	0.9254	High	3.83	4.41	0.675	10.716	0.939	High	3.83	4.41	1.676	26.607	0.9634	High	3.83	4.41	1.613	25.604	0.9575	High	3.83	4.41	1.665	26.435	0.9514	High	3.83	4.41	2.178	34.565	0.9617	High	3.83
B_CD + FGFR	78	90	IKEIRPGKTSRDF	5.82	4	10	5.64	6.08	0.569	8.123	0.8009	Medium	5.65	6.08	0.577	8.238	0.8963	Medium	5.65	6.08	0.557	7.95	0.8989	Medium	5.64	6.08	1.386	19.801	0.9016	Medium	5.65	6.08	1.321	18.872	0.8974	Medium	5.64	6.08	1.361	19.449	0.8956	Medium	5.65	6.08	2.114	30.207	0.8676	Medium	5.65
B_CD + FGFR	78	106	IKEIRPGKTSRDFDRYQEDPAFRPDQSHC	7.17	4	24	7.02	7.4	3.036	18.073	0.8475	Medium	7.02	7.4	3.118	18.558	0.8173	Medium	7.02	7.4	2.881	17.149	0.8405	Medium	7.02	7.4	5.24	31.189	0.8331	Medium	7.02	7.4	5.229	31.122	0.8252	Medium	7.02	7.4	5.185	30.861	0.8372	Medium	7.03	7.4	6.228	37.069	0.8244	Medium	7.02
B_CD + FGFR	90	106	FDRYQEDPAFRPDQSHC	7.75	3	13	7.68	8.15	2.721	29.903	0.9495	High	7.68	8.16	2.682	29.477	0.9515	High	7.68	8.16	2.538	27.893	0.9517	High	7.68	8.16	4.231	46.494	0.9453	High	7.68	8.16	4.257	46.777	0.9429	High	7.67	8.15	4.187	46.006	0.9415	High	7.68	8.16	4.495	49.401	0.9506	High	7.68
B_CD + FGFR	94	107	QEDPAFRPDQSHCF	9.22	2	10	9.12	9.34	1.486	21.232	0.7782	Medium	9.12	9.33	1.453	20.763	0.8233	Medium	9.12	9.33	1.353	19.326	0.8273	Medium	9.12	9.33	2.291	32.723	0.8302	Medium	9.12	9.33	2.356	33.662	0.8122	Medium	9.12	9.33	2.261	32.295	0.7852	Medium	9.12	9.33	2.604	37.194	0.825	Medium	9.12
B_CD + FGFR	97	106	PAFRPDQSHC	6.15	2	7	6.16	6.24	1.716	35.019	0.8682	Medium	6.16	6.24	1.648	33.629	0.899	Medium	6.16	6.24	1.599	32.641	0.8674	Medium	6.15	6.24	2.195	44.803	0.9154	High	6.16	6.24	2.195	44.803	0.8931	High	6.15	6.24	2.206	45.029	0.8909	Medium	6.16	6.24	2.47	50.416	0.9092	Medium	6.16
B_CD + FGFR	111	115	YGMEF	12	1	3	11.84	11.9	0.177	8.446	0.771	Medium	11.83	11.9	0.153	7.299	0.8391	Medium	11.83	11.9	0.154	7.35	0.8104	Medium	11.84	11.9	0.449	21.379	0.8973	Medium	11.83	11.9	0.413	19.687	0.8554	Medium	11.84	11.91	0.452	21.527	0.8878	Medium	11.84	11.9	0.566	26.941	0.8207	Medium	11.84
B_CD + FGFR	115	122	FRLKTLSL	10.23	2	6	10.22	10.56	0.037	0.874	0.9213	High	10.21	10.56	0.031	0.727	0.9176	High	10.21	10.56	0.033	0.775	0.9094	High	10.21	10.56	0.099	2.35	0.9212	High	10.21	10.56	0.101	2.41	0.9217	High	10.22	10.55	0.094	2.236	0.9179	High	10.22	10.56	0.464	11.036	0.9136	Medium	10.21
B_CD + FGFR	116	122	RLKTLSL	8.5	2	5	8.35	8.75	0.027	0.76	0.9284	Medium	8.35	8.75	0.029	0.831	0.9441	Medium	8.35	8.75	0.027	0.77	0.9397	Medium	8.35	8.75	0.028	0.804	0.9515	Medium	8.35	8.75	0.035	1.008	0.935	Medium	8.35	8.75	0.032	0.916	0.9389	Medium	8.35	8.75	0.091	2.6	0.9271	Medium	8.35
B_CD + FGFR	123	128	QATSED	3.41	1	4	3.38	3.56	1.153	41.169	0.8791	Medium	3.38	3.56	1.113	39.734	0.8621	Medium	3.38	3.56	1.094	39.069	0.8835	Medium	3.38	3.56	1.629	58.18	0.8788	Medium	3.38	3.56	1.62	57.875	0.8553	Medium	3.38	3.57	1.617	57.736	0.8186	Medium	3.38	3.56	1.908	68.16	0.8503	Medium	3.38
B_CD + FGFR	132	140	MWIKGLTWL	14.05	2	7	13.95	14.28	0.019	0.381	0.9007	High	13.95	14.28	0.003	0.055	0.9276	High	13.95	14.28	0.002	0.035	0.9509	High	13.95	14.28	0.014	0.284	0.9236	High	13.95	14.28	0	0.003	0.8872	Medium	13.96	14.28	0.02	0.408	0.941	High	13.95	14.28	0.036	0.737	0.9436	High	13.95
B_CD + FGFR	133	140	WIKGLTWL	13.86	1	6	13.74	14.07	0.008	0.185	0.9269	High	13.74	14.07	0.02	0.483	0.9267	High	13.74	14.07	0.014	0.342	0.9261	High	13.74	14.07	0.018	0.432	0.9218	High	13.74	14.07	0.01	0.238	0.9155	High	13.75	14.07	0.023	0.555	0.9177	High	13.74	14.07	0.039	0.93	0.9208	High	13.74
B_CD + FGFR	141	145	MEDTL	8.66	1	3	8.55	8.83	0.035	1.687	0.8927	Medium	8.55	8.84	0.018	0.853	0.8798	Medium	8.55	8.84	0.028	1.338	0.8856	Medium	8.55	8.84	0.041	1.975	0.8751	Medium	8.55	8.84	0.04	1.918	0.8808	Medium	8.55	8.84	0.04	1.893	0.872	Medium	8.55	8.84	0.154	7.332	0.8804	Medium	8.55
B_CD + FGFR	141	146	MEDTLQ	7.25	1	4	7.18	7.47	0.161	5.744	0.6863	Medium	7.18	7.47	0.089	3.188	0.7947	Medium	7.18	7.47	0.135	4.838	0.7733	Medium	7.18	7.47	0.096	3.422	0.7966	Medium	7.18	7.47	0.121	4.316	0.7718	Medium	7.18	7.46	0.115	4.124	0.7553	Medium	7.18	7.47	0.49	17.5	0.8165	Medium	7.18
B_CD + FGFR	141	156	MEDTLQAATPLQIERW	12.52	3	13	12.39	12.53	0.104	1.14	0.9179	High	12.39	12.53	0.101	1.114	0.9238	High	12.39	12.54	0.098	1.072	0.9316	High	12.39	12.53	0.552	6.067	0.9372	High	12.39	12.54	0.548	6.024	0.9377	High	12.39	12.54	0.531	5.832	0.9394	High	12.39	12.53	1.311	14.406	0.9393	High	12.39
B_CD + FGFR	141	161	MEDTLQAATPLQIERWLRKQF	13.19	4	18	13.04	13.69	0.068	0.544	0.9256	High	13.04	13.69	0.071	0.563	0.9285	High	13.04	13.69	0.069	0.551	0.9243	High	13.04	13.69	0.54	4.286	0.9186	High	13.04	13.69	0.567	4.496	0.9188	High	13.04	13.69	0.563	4.468	0.9245	High	13.04	13.69	1.444	11.457	0.9273	High	13.04
B_CD + FGFR	141	162	MEDTLQAATPLQIERWLRKQFY	13.4	4	19	13.41	13.62	0.109	0.818	0.9293	High	13.41	13.62	0.097	0.732	0.9305	High	13.41	13.62	0.092	0.689	0.9417	High	13.41	13.62	0.583	4.387	0.9383	High	13.41	13.62	0.547	4.112	0.9173	High	13.41	13.62	0.558	4.193	0.9208	High	13.41	13.62	1.569	11.799	0.9341	High	13.41
B_CD + FGFR	141	181	MEDTLQAATPLQIERWLRKQFYSVDRNREDRISAKDLKNML	12.24	5	38	12.24	12.57	1.117	4.197	0.9509	High	12.24	12.56	1.101	4.138	0.9466	High	12.24	12.57	1.063	3.997	0.9518	High	12.24	12.57	3.356	12.618	0.9383	High	12.24	12.57	3.328	12.511	0.9366	High	12.24	12.57	3.267	12.281	0.9249	High	12.24	12.57	5.989	22.517	0.936	High	12.24
B_CD + FGFR	143	161	DTLQAATPLQIERWLRKQF	13.2	4	16	13	13.47	0.115	1.025	0.9249	High	13.01	13.47	0.125	1.112	0.8881	High	13.01	13.47	0.107	0.951	0.9237	High	13	13.46	0.619	5.53	0.9306	High	13.01	13.47	0.626	5.591	0.9106	High	13.01	13.47	0.625	5.577	0.9011	High	13	13.47	1.458	13.02	0.9284	High	13
B_CD + FGFR	146	161	QAATPLQIERWLRKQF	12.25	3	13	12.14	12.62	0.071	0.783	0.9228	Medium	12.13	12.62	0.067	0.732	0.9188	Medium	12.13	12.62	0.092	1.008	0.9127	Medium	12.14	12.62	0.443	4.869	0.8943	Medium	12.14	12.62	0.426	4.683	0.9155	Medium	12.14	12.62	0.429	4.716	0.906	Medium	12.14	12.62	0.841	9.246	0.9084	Medium	12.14
B_CD + FGFR	146	162	QAATPLQIERWLRKQFY	12.52	4	14	12.63	12.71	0.092	0.943	0.9584	High	12.64	12.7	0.086	0.878	0.952	High	12.64	12.71	0.052	0.528	0.9579	High	12.63	12.71	0.44	4.488	0.954	High	12.64	12.71	0.425	4.341	0.961	High	12.64	12.71	0.413	4.215	0.9513	High	12.63	12.71	0.922	9.405	0.9477	High	12.64
B_CD + FGFR	162	181	YSVDRNREDRISAKDLKNML	9.03	3	18	8.88	9.38	1.194	9.473	0.9359	High	8.88	9.37	1.223	9.704	0.9456	High	8.88	9.37	1.144	9.081	0.9453	High	8.88	9.37	2.828	22.446	0.9249	High	8.88	9.37	2.779	22.056	0.9306	High	8.87	9.37	2.719	21.579	0.9316	High	8.88	9.38	4.016	31.873	0.9215	High	8.88
B_CD + FGFR	162	184	YSVDRNREDRISAKDLKNMLSQV	10.24	4	21	10.2	10.28	1.093	7.433	0.9287	High	10.2	10.28	1.108	7.54	0.9385	High	10.2	10.28	1.065	7.247	0.9306	High	10.2	10.28	2.767	18.825	0.929	High	10.19	10.28	2.7	18.366	0.9226	High	10.2	10.29	2.641	17.964	0.9169	High	10.2	10.28	4.726	32.146	0.9251	High	10.19
B_CD + FGFR	182	193	SQVNYRVPNMRF	9.9	3	9	9.76	10.27	2.042	32.419	0.9064	High	9.75	10.26	2.001	31.765	0.9082	High	9.75	10.26	1.921	30.496	0.9099	High	9.75	10.26	3.211	50.974	0.9067	High	9.75	10.26	3.192	50.666	0.9084	High	9.76	10.27	3.139	49.821	0.9067	High	9.75	10.27	4.068	64.578	0.9054	High	9.75
B_CD + FGFR	185	193	NYRVPNMRF	9.68	3	6	9.54	10.1	1.971	46.924	0.9376	Medium	9.53	10.1	1.973	46.966	0.9332	Medium	9.53	10.09	1.866	44.439	0.942	Medium	9.53	10.1	3.048	72.578	0.9369	Medium	9.53	10.09	3.018	71.853	0.9333	Medium	9.53	10.1	2.985	71.081	0.9364	Medium	9.54	10.1	3.335	79.414	0.9417	Medium	9.53
B_CD + FGFR	186	193	YRVPNMRF	9.68	3	5	9.52	9.98	1.953	55.796	0.9574	High	9.52	9.98	1.958	55.929	0.9585	High	9.52	9.98	1.858	53.084	0.9596	High	9.52	9.98	2.956	84.455	0.9545	High	9.52	9.98	2.929	83.678	0.9497	High	9.51	9.98	2.885	82.44	0.953	High	9.52	9.98	3.044	86.967	0.9489	High	9.51
B_CD + FGFR	192	201	RFLRERLTDL	8.9	3	8	8.93	9.01	1.387	24.768	0.9251	Medium	8.93	9.01	1.42	25.362	0.9309	Medium	8.93	9.01	1.314	23.467	0.9282	Medium	8.93	9.01	3.423	61.12	0.9094	Medium	8.93	9.01	3.392	60.578	0.9145	Medium	8.93	9.01	3.31	59.112	0.913	Medium	8.93	9.01	3.534	63.114	0.9135	Medium	8.93
B_CD + FGFR	194	201	LRERLTDL	8.31	2	6	8.2	8.72	1.263	30.063	0.83	Medium	8.21	8.73	1.287	30.632	0.8311	Medium	8.21	8.73	1.214	28.903	0.8262	Medium	8.21	8.73	2.786	66.337	0.821	Medium	8.21	8.73	2.77	65.942	0.815	Medium	8.21	8.72	2.772	65.992	0.8252	Medium	8.21	8.73	2.819	67.114	0.8224	Medium	8.21
B_CD + FGFR	202	213	EQRSGDITYGQF	9.68	2	10	9.55	10.08	1.208	17.251	0.8867	High	9.54	10.07	1.156	16.515	0.8934	High	9.54	10.07	1.093	15.61	0.8902	High	9.54	10.07	1.872	26.74	0.8883	High	9.54	10.07	1.846	26.37	0.895	High	9.54	10.08	1.802	25.744	0.8878	High	9.54	10.07	2.915	41.645	0.8964	High	9.54
B_CD + FGFR	217	221	YRSLM	8.39	1	3	8.36	8.65	0.036	1.733	0.8364	Medium	8.36	8.65	0.035	1.659	0.8443	Medium	8.36	8.65	0.031	1.494	0.8428	Medium	8.36	8.65	0.051	2.411	0.8565	Medium	8.36	8.65	0.024	1.143	0.8542	Medium	8.35	8.65	0.034	1.621	0.8585	Medium	8.36	8.65	0.04	1.898	0.858	Medium	8.36
B_CD + FGFR	221	235	MYSAQKTMDLPFLET	12.73	2	12	12.79	12.87	1.392	16.569	0.7929	Medium	12.8	12.87	1.372	16.329	0.8208	Medium	12.8	12.87	1.293	15.391	0.8328	Medium	12.79	12.87	3.107	36.992	0.8176	Medium	12.8	12.87	3.078	36.64	0.7985	Medium	12.8	12.87	3.061	36.436	0.8247	Medium	12.79	12.87	4.824	57.432	0.8238	Medium	12.8
B_CD + FGFR	222	233	YSAQKTMDLPFL	13.14	2	9	12.89	13.5	0.602	9.551	0.8926	Medium	12.89	13.5	0.653	10.37	0.932	High	12.89	13.5	0.596	9.468	0.9069	High	12.89	13.5	1.892	30.024	0.9258	High	12.89	13.5	1.875	29.758	0.9323	High	12.89	13.5	1.852	29.396	0.9331	High	12.89	13.5	3.455	54.843	0.9238	High	12.89
B_CD + FGFR	222	235	YSAQKTMDLPFLET	12.47	2	11	11.94	13.01	1.336	17.348	0.8984	High	11.93	13.02	1.346	17.484	0.8967	High	11.93	13.01	1.262	16.384	0.8932	High	11.94	13.01	3.016	39.167	0.8816	High	11.93	13.01	3.018	39.191	0.8968	High	11.94	13.02	2.971	38.59	0.8875	High	11.94	13.01	4.561	59.237	0.8926	High	11.94
B_CD + FGFR	236	246	NTLRTGERPEL	7.21	3	8	7.04	7.55	3.411	60.916	0.9419	High	7.04	7.55	3.381	60.379	0.938	High	7.04	7.55	3.256	58.145	0.9355	High	7.04	7.55	4.383	78.262	0.9319	Medium	7.04	7.55	4.367	77.98	0.9249	Medium	7.04	7.55	4.329	77.308	0.9322	Medium	7.04	7.55	4.317	77.096	0.9347	High	7.04
B_CD + FGFR	247	251	CQVSL	9.14	1	3	8.91	9.06	0.047	2.252	0.7035	Medium	8.91	9.06	0.044	2.081	0.7549	Medium	8.91	9.06	0.083	3.953	0.7472	Medium	8.91	9.06	0.056	2.655	0.7699	Medium	8.91	9.06	0.05	2.377	0.7507	Medium	8.91	9.07	0.041	1.946	0.7466	Medium	8.91	9.06	0.131	6.248	0.7595	Medium	8.91
B_CD + FGFR	247	253	CQVSLSE	7.8	1	5	7.62	7.89	0.254	7.257	0.8699	Medium	7.62	7.9	0.263	7.519	0.8949	Medium	7.62	7.9	0.237	6.781	0.8981	Medium	7.62	7.9	0.748	21.376	0.8672	Medium	7.62	7.9	0.678	19.369	0.8989	Medium	7.61	7.89	0.691	19.755	0.9041	Medium	7.62	7.9	1.031	29.445	0.8983	Medium	7.62
B_CD + FGFR	249	254	VSLSEF	11.41	1	4	11.25	11.54	0.226	8.063	0.8009	Medium	11.24	11.53	0.212	7.589	0.7981	Medium	11.24	11.53	0.183	6.546	0.7934	Medium	11.25	11.53	0.562	20.085	0.8399	Medium	11.24	11.53	0.553	19.744	0.8246	Medium	11.25	11.54	0.551	19.689	0.8268	Medium	11.25	11.53	0.806	28.794	0.8216	Medium	11.24
B_CD + FGFR	254	258	FQQFL	11.89	1	3	11.76	12.06	0.022	1.064	0.835	Medium	11.76	12.05	0.019	0.927	0.8513	Medium	11.76	12.05	0.023	1.114	0.8643	Medium	11.76	12.05	0.009	0.43	0.8671	Medium	11.76	12.06	0.013	0.617	0.8721	Medium	11.76	12.06	0.056	2.652	0.8449	Medium	11.76	12.05	0.014	0.645	0.8836	Medium	11.76
B_CD + FGFR	259	265	LEYQGEL	9.84	1	5	9.71	10.09	0.155	4.442	0.9264	High	9.7	10.09	0.157	4.485	0.9228	High	9.7	10.09	0.15	4.275	0.9265	High	9.7	10.09	0.7	20.003	0.9191	High	9.7	10.09	0.7	20.01	0.9091	High	9.71	10.09	0.671	19.174	0.9133	High	9.7	10.09	1.166	33.323	0.9176	High	9.7
B_CD + FGFR	266	271	WAVDRL	10.39	1	4	10.23	10.55	0.567	20.251	0.849	Medium	10.23	10.55	0.577	20.612	0.8661	Medium	10.23	10.55	0.554	19.771	0.8193	Medium	10.23	10.55	1.13	40.347	0.9037	Medium	10.23	10.55	1.156	41.276	0.8741	Medium	10.24	10.55	1.131	40.39	0.8823	Medium	10.23	10.55	1.272	45.432	0.8668	Medium	10.23
B_CD + FGFR	276	280	FMLSF	14.12	1	3	13.94	14.31	0.016	0.744	0.898	High	13.95	14.32	0.017	0.81	0.8883	High	13.95	14.31	0.018	0.843	0.891	High	13.94	14.31	0.017	0.794	0.8897	High	13.95	14.31	0.028	1.316	0.892	High	13.95	14.32	0.027	1.292	0.8894	High	13.94	14.31	0.078	3.709	0.8895	High	13.94
B_CD + FGFR	281	287	LRDPLRE	7.17	1	4	6.94	7.26	0.094	3.355	0.9004	High	6.95	7.27	0.063	2.261	0.9452	High	6.95	7.27	0.061	2.163	0.9425	High	6.95	7.27	0.446	15.915	0.9267	Medium	6.95	7.27	0.455	16.254	0.9204	Medium	6.94	7.26	0.433	15.481	0.9213	Medium	6.95	7.27	1.298	46.346	0.9124	Medium	6.95
B_CD + FGFR	281	293	LRDPLREIEEPYF	11.83	3	9	11.66	12.25	0.533	8.455	0.923	Medium	11.66	12.24	0.549	8.715	0.9281	Medium	11.66	12.25	0.512	8.134	0.9221	High	11.66	12.25	1.676	26.596	0.9042	Medium	11.65	12.25	1.644	26.098	0.9044	Medium	11.66	12.25	1.629	25.856	0.9079	Medium	11.66	12.25	2.599	41.256	0.8934	Medium	11.66
B_CD + FGFR	288	293	IEEPYF	11.78	1	3	11.8	11.87	0.179	8.513	0.882	Medium	11.79	11.87	0.203	9.66	0.8862	Medium	11.79	11.87	0.2	9.513	0.8776	Medium	11.79	11.87	0.37	17.601	0.8836	Medium	11.79	11.86	0.347	16.54	0.8975	Medium	11.8	11.87	0.395	18.807	0.8767	Medium	11.79	11.87	0.368	17.519	0.8835	Medium	11.8
B_CD + FGFR	294	298	FLDEL	11.89	1	3	11.72	12.02	0.004	0.168	0.8587	Medium	11.71	12.02	0.01	0.496	0.8661	Medium	11.71	12.02	0.012	0.58	0.8601	Medium	11.72	12.02	0.058	2.782	0.8723	Medium	11.71	12.02	0.046	2.209	0.8719	Medium	11.72	12.02	0.062	2.931	0.872	Medium	11.72	12.02	0.122	5.812	0.8768	Medium	11.72
B_CD + FGFR	298	302	LVTFL	13.19	1	3	12.97	13.47	0.015	0.698	0.9181	High	12.97	13.48	0.009	0.435	0.9088	High	12.97	13.48	0.005	0.26	0.9085	High	12.97	13.47	0.01	0.478	0.9089	High	12.97	13.48	0.004	0.181	0.9108	High	12.97	13.48	0.014	0.678	0.9161	High	12.97	13.47	0.024	1.166	0.9096	High	12.97
B_CD + FGFR	303	310	FSKENSVW	9.79	2	6	9.66	9.87	0.067	1.593	0.8568	Medium	9.66	9.86	0.054	1.274	0.8896	Medium	9.66	9.86	0.047	1.117	0.8812	Medium	9.66	9.86	0.088	2.096	0.8832	Medium	9.66	9.86	0.074	1.756	0.8743	Medium	9.66	9.87	0.103	2.453	0.8671	Medium	9.66	9.86	0.147	3.49	0.868	Medium	9.66
B_CD + FGFR	303	314	FSKENSVWNSQL	10.56	2	10	10.34	10.84	0.145	2.07	0.857	High	10.33	10.82	0.13	1.858	0.8553	High	10.33	10.82	0.156	2.231	0.8345	Medium	10.33	10.82	0.888	12.679	0.8546	High	10.33	10.82	0.8	11.434	0.8353	Medium	10.34	10.82	0.825	11.786	0.8473	Medium	10.33	10.82	2.012	28.743	0.853	High	10.33
B_CD + FGFR	315	329	DAVCPETMNNPLSHY	10.56	2	11	10.07	11.05	0.696	9.033	0.7471	Medium	10.06	11.04	0.723	9.384	0.7598	Medium	10.06	11.04	0.684	8.882	0.7622	Medium	10.06	11.05	1.739	22.589	0.7041	Medium	10.06	11.04	1.753	22.771	0.7052	Medium	10.07	11.05	1.709	22.193	0.705	Medium	10.06	11.05	2.577	33.464	0.7013	Medium	10.06
B_CD + FGFR	319	329	PETMNNPLSHY	9.73	2	8	9.25	9.97	0.075	1.332	0.9074	High	9.26	9.96	0.069	1.232	0.9039	High	9.26	9.96	0.063	1.129	0.9076	High	9.26	9.96	0.27	4.828	0.9125	High	9.26	9.96	0.26	4.651	0.9097	High	9.26	9.97	0.254	4.53	0.9106	High	9.26	9.96	0.887	15.847	0.9033	High	9.25
B_CD + FGFR	330	337	WISSSANT	7.66	1	6	7.53	8.04	0.093	2.216	0.8956	High	7.54	8.04	0.075	1.794	0.8914	High	7.53	8.04	0.11	2.622	0.8926	Medium	7.54	8.04	0.121	2.877	0.8828	High	7.54	8.04	0.146	3.476	0.8981	High	7.53	8.03	0.132	3.132	0.8895	High	7.54	8.04	0.446	10.623	0.9072	High	7.53
B_CD + FGFR	330	339	WISSSANTYL	11.57	1	8	11.61	11.85	0.193	3.447	0.8822	Medium	11.61	11.85	0.193	3.447	0.9141	Medium	11.61	11.85	0.205	3.658	0.8985	Medium	11.61	11.85	0.288	5.146	0.8558	Medium	11.6	11.85	0.289	5.157	0.8676	Medium	11.61	11.86	0.264	4.715	0.878	Medium	11.61	11.85	0.758	13.529	0.9039	Medium	11.61
B_CD + FGFR	344	350	FSSESSL	8.36	1	5	8.34	8.45	0.733	20.939	0.8834	Medium	8.34	8.45	0.744	21.248	0.8859	Medium	8.34	8.45	0.661	18.895	0.9007	Medium	8.34	8.45	1.908	54.52	0.9005	Medium	8.34	8.45	1.96	55.998	0.859	Medium	8.34	8.45	1.784	50.967	0.8595	Medium	8.34	8.45	2.227	63.633	0.9033	Medium	8.34
B_CD + FGFR	345	350	SSESSL	6.35	1	4	6.27	6.35	0.54	19.28	0.8914	High	6.27	6.35	0.6	21.441	0.8865	High	6.27	6.35	0.541	19.339	0.8634	High	6.26	6.35	1.715	61.25	0.8968	High	6.27	6.35	1.665	59.45	0.879	High	6.26	6.35	1.658	59.203	0.8894	High	6.27	6.35	2.064	73.699	0.8988	High	6.27
B_CD + FGFR	345	352	SSESSLEA	6.53	1	6	6.59	6.69	0.73	17.372	0.8478	Medium	6.6	6.7	0.793	18.877	0.8413	Medium	6.59	6.7	0.707	16.843	0.8495	Medium	6.6	6.7	2.228	53.055	0.8149	Medium	6.6	6.7	2.211	52.642	0.8072	Medium	6.59	6.69	2.178	51.852	0.7976	Medium	6.6	6.7	2.591	61.696	0.8242	Medium	6.59
B_CD + FGFR	357	363	LRMGCRC	6.3	2	5	6.11	6.43	0.045	1.272	0.9166	Medium	6.12	6.44	0.039	1.126	0.9195	Medium	6.12	6.44	0.079	2.257	0.9027	Medium	6.11	6.44	0.047	1.337	0.923	Medium	6.12	6.44	0.036	1.03	0.9216	Medium	6.11	6.43	0.115	3.29	0.8857	Medium	6.12	6.44	0.069	1.969	0.9118	Medium	6.12
B_CD + FGFR	367	375	DCWDGPDGM	11.64	1	6	11.52	11.69	0.514	12.226	0.8961	Medium	11.51	11.69	0.465	11.083	0.8492	Medium	11.51	11.69	0.471	11.205	0.8583	Medium	11.52	11.69	0.667	15.89	0.8839	Medium	11.51	11.69	0.665	15.836	0.8763	Medium	11.52	11.7	0.644	15.324	0.8883	Medium	11.52	11.69	1.023	24.358	0.8763	Medium	11.52
B_CD + FGFR	367	386	DCWDGPDGMPVIYHGHTLTT	10.88	3	16	10.7	11.43	1.321	11.797	0.9164	High	10.69	11.43	1.376	12.29	0.9077	High	10.69	11.43	1.286	11.481	0.915	High	10.69	11.43	2.415	21.561	0.9124	High	10.69	11.43	2.413	21.546	0.9182	High	10.7	11.44	2.367	21.132	0.9132	High	10.69	11.43	2.821	25.19	0.916	High	10.69
B_CD + FGFR	367	394	DCWDGPDGMPVIYHGHTLTTKIKFSDVL	11.61	4	24	11.6	11.69	1.471	8.753	0.9351	High	11.6	11.69	1.466	8.726	0.9144	High	11.6	11.69	1.411	8.399	0.9279	High	11.6	11.69	3.028	18.023	0.8927	Medium	11.6	11.69	2.891	17.206	0.9035	High	11.6	11.7	2.894	17.227	0.8835	High	11.6	11.69	4.081	24.293	0.917	High	11.6
B_CD + FGFR	367	396	DCWDGPDGMPVIYHGHTLTTKIKFSDVLHT	10.9	5	26	10.84	11.17	1.454	7.988	0.908	High	10.82	11.17	1.447	7.948	0.8913	High	10.82	11.17	1.364	7.493	0.9018	High	10.82	11.17	2.915	16.018	0.88	Medium	10.82	11.17	2.731	15.006	0.8867	High	10.82	11.18	2.763	15.181	0.8804	Medium	10.82	11.17	3.897	21.412	0.8647	Medium	10.82
B_CD + FGFR	376	386	PVIYHGHTLTT	7.16	3	9	7.21	7.36	1.134	17.995	0.8253	Medium	7.21	7.36	1.165	18.488	0.8451	Medium	7.21	7.36	1.065	16.906	0.8375	Medium	7.21	7.36	2.114	33.552	0.8431	Medium	7.21	7.36	2.121	33.671	0.8316	Medium	7.2	7.35	2.119	33.636	0.8438	Medium	7.21	7.36	2.113	33.536	0.8417	Medium	7.21
B_CD + FGFR	387	394	KIKFSDVL	9.87	1	6	9.76	10.08	0.364	8.657	0.9275	High	9.76	10.07	0.362	8.615	0.9044	High	9.76	10.07	0.337	8.025	0.9297	High	9.76	10.07	0.758	18.045	0.939	High	9.76	10.07	0.714	17.006	0.9167	High	9.76	10.08	0.724	17.227	0.9286	Medium	9.76	10.07	1.131	26.928	0.9328	Medium	9.76
B_CD + FGFR	387	399	KIKFSDVLHTIKE	9.3	3	11	9.19	9.29	0.276	3.583	0.8382	Medium	9.2	9.3	0.261	3.388	0.8742	Medium	9.2	9.3	0.27	3.511	0.8673	Medium	9.2	9.3	0.535	6.949	0.8091	Medium	9.2	9.3	0.486	6.309	0.8176	Medium	9.2	9.29	0.503	6.529	0.8342	Medium	9.2	9.3	0.842	10.932	0.8328	Medium	9.2
B_CD + FGFR	391	399	SDVLHTIKE	7.38	3	7	7.24	7.33	0.061	1.255	0.8821	Medium	7.24	7.33	0.056	1.143	0.9129	High	7.24	7.33	0.065	1.33	0.8671	High	7.24	7.34	0.076	1.558	0.9101	High	7.24	7.33	0.063	1.288	0.9174	High	7.24	7.33	0.069	1.4	0.9174	High	7.24	7.34	0.135	2.757	0.9238	High	7.24
B_CD + FGFR	391	401	SDVLHTIKEHA	7.91	3	9	7.85	8.25	0.164	2.601	0.848	Medium	7.85	8.25	0.127	2.021	0.8649	Medium	7.85	8.25	0.134	2.127	0.8612	Medium	7.85	8.25	0.117	1.855	0.8554	Medium	7.85	8.25	0.121	1.918	0.8503	Medium	7.85	8.24	0.135	2.141	0.8542	Medium	7.86	8.25	0.227	3.604	0.8451	Medium	7.85
B_CD + FGFR	400	407	HAFVASEY	8.18	1	6	8.04	8.4	0.178	4.235	0.8758	Medium	8.04	8.4	0.193	4.594	0.8869	Medium	8.04	8.4	0.156	3.719	0.8904	Medium	8.04	8.4	0.798	19	0.8592	Medium	8.04	8.4	0.81	19.279	0.8431	Medium	8.03	8.4	0.749	17.824	0.8445	Medium	8.04	8.4	1.713	40.783	0.8395	Medium	8.04
B_CD + FGFR	400	411	HAFVASEYPVIL	11.91	2	9	11.75	12.13	0.139	2.206	0.7763	Medium	11.74	12.13	0.146	2.311	0.8189	Medium	11.74	12.13	0.123	1.954	0.8221	Medium	11.74	12.13	0.638	10.129	0.837	Medium	11.74	12.13	0.586	9.299	0.8282	Medium	11.75	12.13	0.599	9.511	0.8271	Medium	11.74	12.13	1.324	21.019	0.8405	Medium	11.75
B_CD + FGFR	402	406	FVASE	6.03	1	3	5.96	6.27	0.229	10.901	0.8077	Medium	5.97	6.27	0.218	10.381	0.8279	Medium	5.97	6.27	0.219	10.429	0.8353	Medium	5.96	6.26	0.84	40.018	0.8339	Medium	5.97	6.27	0.8	38.086	0.8382	Medium	5.96	6.26	0.825	39.269	0.8301	Medium	5.97	6.27	1.511	71.965	0.8516	Medium	5.96
B_CD + FGFR	407	411	YPVIL	12.15	1	3	11.78	12.3	0.011	0.54	0.8971	Medium	11.77	12.29	0.008	0.399	0.896	Medium	11.77	12.3	0.019	0.886	0.8945	Medium	11.78	12.3	0.012	0.567	0.8929	Medium	11.77	12.3	0.015	0.704	0.8961	Medium	11.78	12.3	0.022	1.026	0.8774	Medium	11.78	12.3	0.027	1.283	0.8914	Medium	11.78
B_CD + FGFR	412	437	SIEDHCSIAQQRNMAQHFRKVLGDTL	10.39	4	24	10.33	10.85	1.302	7.748	0.9155	High	10.32	10.84	1.307	7.777	0.9133	High	10.32	10.84	1.256	7.474	0.91	High	10.32	10.84	2.027	12.066	0.9095	High	10.32	10.84	1.954	11.631	0.9128	High	10.33	10.85	1.931	11.491	0.9073	High	10.32	10.85	3.174	18.891	0.9136	High	10.32
B_CD + FGFR	428	437	HFRKVLGDTL	7.8	3	8	7.89	7.95	0.229	4.093	0.8985	Medium	7.89	7.95	0.223	3.974	0.8926	Medium	7.89	7.95	0.214	3.822	0.8958	Medium	7.89	7.96	0.634	11.324	0.889	Medium	7.89	7.95	0.636	11.361	0.9093	Medium	7.88	7.95	0.617	11.01	0.8939	Medium	7.89	7.96	1.214	21.682	0.8667	Medium	7.89
B_CD + FGFR	438	443	LTKPVD	4.58	1	3	4.6	4.86	0.651	30.988	0.8468	Medium	4.61	4.87	0.583	27.755	0.9081	Medium	4.6	4.87	0.556	26.496	0.9074	Medium	4.6	4.86	1.129	53.778	0.9054	Medium	4.61	4.87	1.13	53.819	0.9106	Medium	4.61	4.86	1.14	54.277	0.893	Medium	4.61	4.87	1.635	77.835	0.9086	Medium	4.6
B_CD + FGFR	438	446	LTKPVDIAA	7.34	1	6	7.27	7.66	1.982	47.194	0.9209	Medium	7.28	7.66	1.949	46.396	0.9214	Medium	7.27	7.66	1.886	44.914	0.9241	High	7.28	7.66	2.535	60.354	0.9216	Medium	7.28	7.66	2.511	59.795	0.9136	Medium	7.27	7.66	2.504	59.623	0.9234	Medium	7.28	7.66	2.994	71.291	0.9197	Medium	7.27
B_CD + FGFR	438	455	LTKPVDIAADGLPSPNQL	10.67	3	13	10.49	10.7	2.202	24.201	0.9015	Medium	10.49	10.69	2.171	23.858	0.9334	Medium	10.49	10.69	2.078	22.84	0.9335	Medium	10.49	10.69	2.824	31.032	0.9059	Medium	10.49	10.69	2.762	30.349	0.9201	Medium	10.49	10.7	2.759	30.321	0.9185	Medium	10.49	10.69	3.657	40.191	0.9314	Medium	10.49
B_CD + FGFR	438	471	LTKPVDIAADGLPSPNQLKRKILIKHKKLAEGSA	8.17	5	29	7.81	8.64	3.769	18.565	0.9482	High	7.81	8.64	3.735	18.4	0.9507	High	7.81	8.64	3.574	17.608	0.9475	High	7.81	8.64	4.797	23.632	0.9425	Medium	7.81	8.64	4.697	23.136	0.9264	Medium	7.81	8.64	4.702	23.162	0.9417	Medium	7.82	8.64	5.709	28.122	0.9387	Medium	7.81
B_CD + FGFR	438	472	LTKPVDIAADGLPSPNQLKRKILIKHKKLAEGSAY	8.72	5	30	8.53	8.6	4.202	20.009	0.9151	High	8.53	8.6	4.121	19.622	0.9301	High	8.53	8.6	3.991	19.004	0.9293	High	8.53	8.6	5.195	24.74	0.9277	High	8.53	8.6	5.168	24.611	0.9146	High	8.53	8.6	5.082	24.198	0.9252	High	8.54	8.6	6.154	29.303	0.9137	High	8.53
B_CD + FGFR	444	455	IAADGLPSPNQL	10.42	1	8	10.61	10.77	0.811	14.49	0.8958	Medium	10.61	10.77	0.766	13.68	0.8519	Medium	10.61	10.77	0.736	13.15	0.8494	Medium	10.61	10.77	1.015	18.128	0.8489	Medium	10.61	10.77	0.979	17.476	0.8455	Medium	10.6	10.77	1	17.858	0.8399	Medium	10.61	10.77	1.335	23.834	0.8524	Medium	10.61
B_CD + FGFR	447	455	DGLPSPNQL	10.11	1	5	9.93	10.41	0.067	1.92	0.9002	High	9.93	10.41	0.057	1.639	0.8968	High	9.93	10.41	0.069	1.974	0.8938	High	9.93	10.41	0.063	1.8	0.8963	High	9.93	10.4	0.069	1.958	0.8925	High	9.93	10.41	0.06	1.722	0.8889	High	9.93	10.41	0.161	4.597	0.8945	High	9.93
B_CD + FGFR	447	471	DGLPSPNQLKRKILIKHKKLAEGSA	7.22	4	21	7.24	7.71	1.95	13.264	0.9084	Medium	7.24	7.71	1.917	13.038	0.9126	Medium	7.24	7.71	1.855	12.616	0.9128	Medium	7.24	7.71	2.372	16.135	0.9256	Medium	7.24	7.71	2.314	15.741	0.9184	Medium	7.24	7.71	2.333	15.874	0.9149	Medium	7.24	7.71	2.597	17.668	0.9389	High	7.24
B_CD + FGFR	456	471	KRKILIKHKKLAEGSA	3.66	4	14	3.65	4.14	2.281	23.278	0.9648	High	3.66	4.14	2.271	23.175	0.952	High	3.66	4.14	2.19	22.345	0.9594	High	3.66	4.14	2.72	27.75	0.9652	High	3.66	4.14	2.7	27.554	0.9612	High	3.65	4.14	2.692	27.474	0.9636	High	3.66	4.14	2.897	29.562	0.9658	High	3.66
B_CD + FGFR	456	472	KRKILIKHKKLAEGSAY	4.25	4	15	4.34	4.42	2.778	26.459	0.9595	Medium	4.34	4.42	2.712	25.832	0.9606	High	4.34	4.42	2.618	24.93	0.9616	High	4.34	4.42	3.155	30.049	0.9646	High	4.35	4.42	3.161	30.101	0.955	High	4.35	4.42	3.179	30.275	0.9611	High	4.35	4.42	3.279	31.226	0.9557	High	4.34
B_CD + FGFR	472	480	YEEVPTSVM	9.79	1	6	9.65	10.44	3.114	74.147	0.9271	High	9.64	10.43	3.126	74.42	0.9125	High	9.64	10.43	2.989	71.167	0.919	High	9.64	10.43	3.494	83.181	0.9159	High	9.64	10.43	3.499	83.31	0.9059	High	9.64	10.44	3.462	82.425	0.9147	High	9.64	10.43	3.425	81.544	0.9096	High	9.64
B_CD + FGFR	473	480	EEVPTSVM	9.08	1	5	8.85	9.45	2.836	81.017	0.8107	Medium	8.85	9.44	2.813	80.366	0.8199	Medium	8.85	9.44	2.66	76.014	0.8148	Medium	8.85	9.44	3.146	89.889	0.8226	Medium	8.85	9.44	3.142	89.764	0.8024	Medium	8.86	9.45	3.089	88.264	0.8014	Medium	8.85	9.44	3.115	88.991	0.8273	Medium	8.85
B_CD + FGFR	481	488	YSENDISN	6.21	1	6	6.11	6.39	2.685	63.918	0.8373	Medium	6.11	6.39	2.638	62.81	0.8483	Medium	6.11	6.39	2.565	61.079	0.8492	Medium	6.1	6.4	3.068	73.054	0.8314	Medium	6.11	6.39	3.066	73.005	0.8396	Medium	6.1	6.39	3.014	71.77	0.8405	Medium	6.11	6.4	2.994	71.289	0.84	Medium	6.11
B_CD + FGFR	481	495	YSENDISNSIKNGIL	11.41	2	13	11.27	11.77	2.256	24.796	0.8995	High	11.26	11.76	2.281	25.062	0.9044	High	11.26	11.76	2.171	23.852	0.9012	High	11.26	11.77	3.494	38.393	0.8981	High	11.26	11.76	3.422	37.609	0.8908	High	11.27	11.77	3.405	37.415	0.8925	High	11.27	11.77	4.16	45.71	0.8973	High	11.27
B_CD + FGFR	481	496	YSENDISNSIKNGILY	11.53	2	14	11.46	11.59	2.303	23.498	0.9165	Medium	11.45	11.58	2.243	22.887	0.906	Medium	11.45	11.58	2.188	22.331	0.8923	Medium	11.46	11.58	3.589	36.627	0.8943	Medium	11.45	11.58	3.532	36.039	0.8735	Medium	11.46	11.59	3.466	35.368	0.8876	Medium	11.46	11.58	4.286	43.735	0.8848	Medium	11.46
B_CD + FGFR	481	509	YSENDISNSIKNGILYLEDPVNHEWYPHY	13.81	4	25	13.74	13.84	2.024	11.566	0.9485	High	13.74	13.85	1.974	11.28	0.9309	High	13.74	13.85	1.897	10.838	0.9412	High	13.74	13.84	3.261	18.636	0.9391	High	13.74	13.84	3.211	18.347	0.907	High	13.75	13.85	3.213	18.362	0.9352	High	13.74	13.84	4.77	27.257	0.9433	High	13.74
B_CD + FGFR	489	495	SIKNGIL	8.77	2	5	8.61	8.95	0.092	2.617	0.9401	High	8.61	8.95	0.087	2.487	0.9463	High	8.61	8.95	0.075	2.132	0.9522	High	8.61	8.95	0.381	10.893	0.9432	Medium	8.61	8.95	0.381	10.873	0.9378	Medium	8.61	8.95	0.373	10.665	0.944	Medium	8.61	8.96	0.779	22.25	0.9338	Medium	8.61
B_CD + FGFR	496	509	YLEDPVNHEWYPHY	10.77	2	10	10.49	11.28	0.046	0.653	0.9048	Medium	10.48	11.27	0.042	0.602	0.9109	Medium	10.48	11.27	0.048	0.683	0.9068	Medium	10.48	11.27	0.146	2.083	0.9077	Medium	10.48	11.27	0.127	1.814	0.9127	Medium	10.48	11.28	0.132	1.888	0.9064	Medium	10.48	11.27	0.694	9.913	0.913	Medium	10.48
B_CD + FGFR	497	509	LEDPVNHEWYPHY	10.4	3	9	10.45	10.5	0.109	1.735	0.8732	Medium	10.45	10.5	0.168	2.663	0.8567	Medium	10.45	10.5	0.101	1.609	0.8681	Medium	10.45	10.5	0.222	3.531	0.8959	High	10.45	10.5	0.209	3.316	0.8877	High	10.45	10.5	0.212	3.361	0.8925	High	10.45	10.5	0.805	12.782	0.8817	High	10.45
B_CD + FGFR	510	519	FVLTSSKIYY	10.93	2	8	10.79	11.18	0.338	6.037	0.7945	Medium	10.79	11.18	0.311	5.545	0.778	Medium	10.79	11.18	0.279	4.98	0.76	Medium	10.79	11.18	0.991	17.689	0.7883	Medium	10.79	11.18	0.928	16.575	0.7705	Medium	10.8	11.18	0.903	16.118	0.7669	Medium	10.8	11.18	1.091	19.482	0.8022	Medium	10.79
B_CD + FGFR	510	522	FVLTSSKIYYSEE	10.17	2	11	10.08	10.42	0.748	9.72	0.9032	High	10.07	10.41	0.76	9.869	0.9043	High	10.07	10.41	0.736	9.56	0.8943	High	10.07	10.42	1.853	24.061	0.9048	High	10.07	10.41	1.783	23.158	0.9032	High	10.08	10.42	1.803	23.421	0.9065	High	10.07	10.42	2.022	26.259	0.8946	High	10.07
B_CD + FGFR	523	530	TSSDQGNE	3.19	1	6	3.33	3.5	2.361	56.208	0.8839	Medium	3.33	3.51	2.31	55.003	0.8692	Medium	3.33	3.5	2.244	53.424	0.9054	Medium	3.33	3.5	2.357	56.111	0.8989	Medium	3.33	3.51	2.332	55.524	0.8768	Medium	3.33	3.51	2.345	55.838	0.8859	Medium	3.33	3.51	2.264	53.903	0.8833	Medium	3.33
B_CD + FGFR	523	531	TSSDQGNED	3.46	1	7	3.45	3.58	2.593	52.925	0.8402	Medium	3.45	3.58	2.62	53.46	0.834	Medium	3.45	3.58	2.514	51.3	0.8799	Medium	3.45	3.58	2.684	54.77	0.8638	Medium	3.45	3.58	2.617	53.418	0.8684	Medium	3.46	3.58	2.639	53.857	0.8311	Medium	3.46	3.58	2.579	52.625	0.856	Medium	3.45
B_CD + FGFR	545	566	HSSEKWFHGKLGAGRDGRHIAE	6.25	5	20	6.13	6.26	1.827	13.048	0.8687	High	6.13	6.26	1.742	12.441	0.9181	High	6.13	6.26	1.713	12.233	0.9161	High	6.13	6.25	2.835	20.25	0.9078	High	6.13	6.26	2.804	20.029	0.9087	High	6.13	6.25	2.812	20.083	0.9066	High	6.13	6.26	4.355	31.104	0.9212	High	6.13
B_CD + FGFR	545	568	HSSEKWFHGKLGAGRDGRHIAERL	6.89	5	22	6.79	7.31	1.295	8.406	0.9	High	6.8	7.31	1.236	8.025	0.8998	High	6.8	7.31	1.224	7.945	0.8959	High	6.8	7.31	2.225	14.45	0.8954	High	6.8	7.31	2.19	14.224	0.8947	High	6.79	7.3	2.197	14.264	0.8913	High	6.8	7.31	3.96	25.716	0.8953	High	6.8
B_CD + FGFR	572	583	YCIETGAPDGSF	10.72	1	9	10.58	11.26	0.347	5.504	0.9175	High	10.57	11.25	0.335	5.314	0.924	High	10.57	11.25	0.329	5.217	0.9233	High	10.58	11.26	1.386	21.994	0.9109	High	10.57	11.25	1.347	21.376	0.9144	High	10.57	11.26	1.35	21.427	0.9086	High	10.58	11.26	2.235	35.48	0.9123	High	10.57
B_CD + FGFR	573	583	CIETGAPDGSF	9.62	1	8	9.41	9.94	0.402	7.174	0.8412	Medium	9.41	9.94	0.402	7.187	0.8684	Medium	9.41	9.94	0.369	6.583	0.8497	Medium	9.41	9.94	1.447	25.837	0.8683	Medium	9.41	9.93	1.393	24.877	0.8447	Medium	9.4	9.94	1.394	24.901	0.8596	Medium	9.41	9.94	2.201	39.301	0.8692	Medium	9.41
B_CD + FGFR	573	584	CIETGAPDGSFL	11.73	1	9	11.55	11.94	0.444	7.046	0.8563	Medium	11.55	11.93	0.47	7.455	0.8589	Medium	11.55	11.93	0.414	6.577	0.8606	Medium	11.55	11.94	1.352	21.459	0.8704	Medium	11.55	11.93	1.332	21.135	0.871	Medium	11.55	11.94	1.345	21.35	0.8577	Medium	11.55	11.94	1.989	31.569	0.8724	Medium	11.55
B_CD + FGFR	574	583	IETGAPDGSF	9.08	1	7	8.98	9.41	0.384	7.836	0.8467	Medium	8.98	9.41	0.414	8.456	0.8629	Medium	8.98	9.41	0.378	7.714	0.8653	Medium	8.98	9.41	1.215	24.793	0.8552	Medium	8.98	9.41	1.198	24.459	0.8384	Medium	8.98	9.4	1.28	26.119	0.842	Medium	8.98	9.41	1.71	34.894	0.8571	Medium	8.98
B_CD + FGFR	584	590	LVRESET	4.35	2	5	4.28	4.77	0.304	8.695	0.866	High	4.29	4.77	0.308	8.793	0.8999	High	4.29	4.77	0.28	8.004	0.8893	High	4.28	4.77	0.622	17.786	0.8892	High	4.29	4.77	0.615	17.57	0.8984	High	4.29	4.77	0.582	16.636	0.892	High	4.29	4.77	1.591	45.458	0.9333	High	4.29
B_CD + FGFR	595	599	YTLSF	12.25	1	3	12.03	12.44	0.019	0.923	0.8049	Medium	12.03	12.44	0.043	2.039	0.8169	Medium	12.02	12.44	0.027	1.287	0.8246	Medium	12.03	12.44	0.041	1.933	0.8227	Medium	12.02	12.44	0.04	1.893	0.8094	Medium	12.03	12.44	0.012	0.592	0.8355	Medium	12.03	12.44	0.01	0.457	0.8361	Medium	12.03
B_CD + FGFR	600	621	WRNGKVQHCRIHSRQDAGTPKF	5.45	5	19	5.36	6.45	1.409	10.594	0.9261	High	5.36	6.45	1.388	10.434	0.9222	High	5.36	6.45	1.336	10.046	0.9177	High	5.36	6.46	1.752	13.173	0.9213	High	5.36	6.45	1.75	13.156	0.9274	High	5.35	6.45	1.741	13.091	0.9219	High	5.36	6.45	2.194	16.497	0.9282	High	5.36
B_CD + FGFR	622	627	FLTDNL	10.94	1	4	10.79	11.16	0.478	17.057	0.9021	Medium	10.79	11.15	0.496	17.717	0.8934	Medium	10.79	11.15	0.444	15.87	0.896	Medium	10.79	11.15	0.913	32.591	0.8858	Medium	10.79	11.15	0.887	31.665	0.888	Medium	10.8	11.16	0.871	31.096	0.8876	Medium	10.8	11.16	1.643	58.683	0.8748	Medium	10.79
B_CD + FGFR	622	629	FLTDNLVF	14.01	1	6	13.83	14.19	0.299	7.125	0.8929	Medium	13.84	14.2	0.311	7.416	0.9012	Medium	13.84	14.2	0.267	6.35	0.894	Medium	13.83	14.2	0.691	16.455	0.8927	Medium	13.84	14.2	0.589	14.023	0.8811	Medium	13.84	14.2	0.679	16.157	0.8911	Medium	13.83	14.2	1.5	35.718	0.8907	Medium	13.84
B_CD + FGFR	628	632	VFDSL	10.45	1	3	10.44	10.7	0.206	9.792	0.8533	Medium	10.44	10.7	0.22	10.467	0.8659	Medium	10.44	10.7	0.212	10.119	0.8431	Medium	10.44	10.7	0.877	41.784	0.8452	Medium	10.44	10.7	0.853	40.596	0.842	Medium	10.45	10.71	0.844	40.199	0.8336	Medium	10.44	10.7	0.91	43.342	0.8342	Medium	10.44
B_CD + FGFR	633	637	YDLIT	9.85	1	3	9.74	10.13	0.018	0.839	0.832	Medium	9.73	10.13	0.011	0.532	0.8532	Medium	9.73	10.13	0.016	0.768	0.8423	Medium	9.74	10.13	0.009	0.42	0.8267	Medium	9.73	10.13	0.017	0.798	0.8292	Medium	9.74	10.13	0.017	0.828	0.7928	Medium	9.74	10.13	0.014	0.676	0.8161	Medium	9.73
B_CD + FGFR	633	646	YDLITHYQQVPLRC	10.28	3	11	10.23	10.39	0.251	3.254	0.9079	High	10.22	10.39	0.259	3.367	0.9125	High	10.22	10.39	0.245	3.177	0.9093	High	10.22	10.39	0.875	11.368	0.9142	High	10.22	10.39	0.845	10.979	0.9132	High	10.23	10.39	0.845	10.977	0.9114	High	10.22	10.39	1.502	19.511	0.9194	High	10.22
B_CD + FGFR	633	648	YDLITHYQQVPLRCNE	9.85	3	13	9.75	9.85	0.736	8.086	0.9137	High	9.74	9.84	0.727	7.987	0.9169	High	9.74	9.84	0.681	7.488	0.9262	High	9.74	9.85	1.295	14.227	0.904	High	9.74	9.84	1.295	14.229	0.9232	High	9.75	9.85	1.256	13.799	0.9138	High	9.75	9.85	1.851	20.345	0.9079	High	9.74
B_CD + FGFR	636	646	ITHYQQVPLRC	7.78	2	8	7.68	7.89	0.292	5.22	0.9072	High	7.68	7.89	0.29	5.175	0.9036	High	7.68	7.89	0.287	5.123	0.9134	High	7.68	7.89	0.939	16.773	0.9108	High	7.68	7.89	0.904	16.149	0.915	High	7.67	7.88	0.897	16.017	0.9075	High	7.68	7.89	1.588	28.364	0.9091	High	7.68
B_CD + FGFR	638	648	HYQQVPLRCNE	6.79	3	8	6.84	6.91	0.858	15.319	0.8897	Medium	6.84	6.91	0.793	14.169	0.8479	Medium	6.84	6.91	0.783	13.974	0.8667	Medium	6.84	6.92	1.463	26.128	0.8619	Medium	6.84	6.91	1.444	25.786	0.883	Medium	6.83	6.91	1.405	25.094	0.8712	Medium	6.84	6.92	2.008	35.855	0.8514	Medium	6.84
B_CD + FGFR	640	648	QQVPLRCNE	6.68	2	6	6.58	6.8	1.066	25.373	0.9008	Medium	6.58	6.81	1.071	25.5	0.9064	Medium	6.58	6.8	1.021	24.302	0.9123	Medium	6.58	6.81	1.733	41.272	0.913	Medium	6.58	6.81	1.755	41.783	0.9035	Medium	6.57	6.8	1.716	40.855	0.8954	Medium	6.58	6.81	2.215	52.737	0.91	Medium	6.58
B_CD + FGFR	649	662	FEMRLSEPVPQTNA	9.69	2	10	9.74	9.79	1.445	20.643	0.9147	High	9.73	9.78	1.461	20.87	0.9235	High	9.73	9.78	1.37	19.571	0.9173	High	9.74	9.79	2.502	35.737	0.9143	High	9.73	9.78	2.465	35.218	0.9154	High	9.74	9.79	2.428	34.689	0.9239	High	9.74	9.79	3.237	46.249	0.9251	High	9.73
B_CD + FGFR	649	667	FEMRLSEPVPQTNAHESKE	8.33	4	15	8.18	8.76	1.611	15.347	0.8801	High	8.18	8.76	1.572	14.97	0.8656	Medium	8.18	8.76	1.492	14.213	0.8739	Medium	8.18	8.76	2.654	25.279	0.8743	Medium	8.18	8.76	2.651	25.243	0.8801	Medium	8.19	8.76	2.606	24.816	0.8651	Medium	8.18	8.76	3.576	34.059	0.8727	Medium	8.18
B_CD + FGFR	650	662	EMRLSEPVPQTNA	8.18	2	9	8.11	8.18	1.571	24.942	0.8488	Medium	8.11	8.18	1.558	24.725	0.8182	Medium	8.11	8.18	1.465	23.251	0.82	Medium	8.11	8.18	2.541	40.331	0.7766	Medium	8.11	8.18	2.488	39.495	0.7963	Medium	8.11	8.19	2.492	39.556	0.7917	Medium	8.12	8.18	3.089	49.033	0.7788	Medium	8.11
B_CD + FGFR	650	667	EMRLSEPVPQTNAHESKE	6.68	4	14	6.58	7.08	1.945	19.848	0.9131	High	6.58	7.08	1.917	19.564	0.9121	High	6.58	7.08	1.823	18.597	0.9109	High	6.58	7.08	3.02	30.814	0.8916	High	6.58	7.08	3.035	30.973	0.8964	High	6.57	7.08	2.956	30.161	0.8949	Medium	6.58	7.08	3.878	39.575	0.8876	High	6.58
B_CD + FGFR	651	662	MRLSEPVPQTNA	7.8	2	8	7.68	7.77	1.566	27.96	0.8208	Medium	7.68	7.77	1.589	28.378	0.8682	Medium	7.68	7.77	1.516	27.079	0.8553	Medium	7.68	7.77	2.193	39.164	0.8501	Medium	7.68	7.77	2.162	38.613	0.8356	Medium	7.67	7.77	2.189	39.082	0.8499	Medium	7.68	7.77	2.841	50.738	0.8481	Medium	7.68
B_CD + FGFR	651	667	MRLSEPVPQTNAHESKE	6.4	4	13	6.21	6.63	1.877	20.623	0.9253	High	6.21	6.63	1.845	20.27	0.9156	Medium	6.21	6.63	1.754	19.269	0.9284	High	6.2	6.63	2.627	28.873	0.8961	Medium	6.21	6.63	2.602	28.588	0.8983	Medium	6.2	6.62	2.561	28.139	0.9025	Medium	6.21	6.63	3.446	37.867	0.891	Medium	6.21
B_CD + FGFR	668	682	WYHASLTRAQAEHML	9.41	3	13	9.55	9.66	0.831	9.137	0.7957	Medium	9.54	9.66	0.858	9.433	0.8139	Medium	9.54	9.66	0.787	8.644	0.822	Medium	9.54	9.66	1.82	20.002	0.785	Medium	9.54	9.66	1.798	19.758	0.778	Medium	9.54	9.66	1.743	19.158	0.7696	Medium	9.54	9.66	2.47	27.145	0.8082	Medium	9.54
B_CD + FGFR	674	682	TRAQAEHML	6.79	2	7	6.68	7.12	0.197	4.025	0.8723	Medium	6.69	7.12	0.205	4.18	0.8709	Medium	6.69	7.12	0.182	3.722	0.8642	Medium	6.69	7.13	0.545	11.133	0.8538	Medium	6.69	7.12	0.524	10.696	0.8317	Medium	6.68	7.12	0.502	10.247	0.877	Medium	6.69	7.13	0.733	14.962	0.8649	Medium	6.69
B_CD + FGFR	683	691	MRVPRDGAF	8.07	2	6	7.99	8.3	0.118	2.819	0.9037	Medium	7.99	8.3	0.122	2.911	0.8957	Medium	7.99	8.3	0.116	2.772	0.8955	Medium	7.99	8.3	0.27	6.434	0.9042	Medium	7.99	8.3	0.272	6.479	0.9022	Medium	7.98	8.3	0.27	6.43	0.893	Medium	7.99	8.3	0.398	9.488	0.9024	Medium	7.99
B_CD + FGFR	692	701	LVRKRNEPNS	3.34	3	7	3.26	3.75	1.595	32.55	0.9676	High	3.26	3.75	1.6	32.661	0.9695	High	3.26	3.75	1.54	31.425	0.966	High	3.26	3.75	2.419	49.367	0.9701	High	3.26	3.75	2.413	49.252	0.9611	High	3.26	3.75	2.386	48.685	0.9699	High	3.26	3.75	2.455	50.096	0.9617	High	3.26
B_CD + FGFR	692	702	LVRKRNEPNSY	4.14	3	8	4.09	4.76	1.386	24.755	0.9513	High	4.09	4.76	1.393	24.872	0.9466	High	4.09	4.76	1.332	23.779	0.9504	High	4.09	4.76	2.119	37.835	0.9528	High	4.09	4.77	2.1	37.492	0.9467	High	4.09	4.76	2.102	37.534	0.9529	High	4.09	4.77	2.178	38.89	0.9521	High	4.09
B_CD + FGFR	693	702	VRKRNEPNSY	3.93	3	7	3.87	4.33	1.425	29.075	0.9462	High	3.87	4.34	1.414	28.862	0.9498	High	3.87	4.34	1.363	27.814	0.9462	High	3.87	4.33	2.17	44.281	0.9112	High	3.88	4.34	2.146	43.795	0.9422	High	3.88	4.34	2.138	43.623	0.9329	High	3.88	4.34	2.218	45.269	0.9328	High	3.87
B_CD + FGFR	707	725	RAEGKIKHCRVQQEGQTVM	5.03	4	17	4.96	5.69	1.235	10.382	0.93	High	4.96	5.7	1.219	10.243	0.921	High	4.96	5.7	1.195	10.044	0.9255	High	4.95	5.69	1.873	15.74	0.9288	High	4.96	5.7	1.838	15.447	0.9333	High	4.95	5.69	1.837	15.44	0.9328	High	4.96	5.7	3.209	26.965	0.926	High	4.96
B_CD + FGFR	723	731	TVMLGNSEF	11.22	1	7	11.17	11.31	0.751	15.33	0.8292	Medium	11.16	11.3	0.724	14.776	0.8008	Medium	11.16	11.3	0.68	13.886	0.8041	Medium	11.16	11.31	1.025	20.913	0.7887	Medium	11.16	11.3	1.006	20.54	0.8063	Medium	11.17	11.31	0.986	20.12	0.7894	Medium	11.16	11.31	1.422	29.012	0.8206	Medium	11.16
B_CD + FGFR	741	758	YEKHPLYRKMKLRYPINE	7.32	3	14	7.59	7.69	0.623	6.352	0.8863	Medium	7.59	7.69	0.62	6.331	0.9042	Medium	7.59	7.69	0.58	5.917	0.9011	Medium	7.59	7.7	1.12	11.427	0.8692	Medium	7.59	7.69	1.158	11.812	0.8951	Medium	7.59	7.69	1.163	11.867	0.8923	High	7.6	7.7	1.7	17.35	0.8977	Medium	7.59
B_CD + FGFR	741	760	YEKHPLYRKMKLRYPINEEA	7.42	3	16	7.29	7.53	0.639	5.702	0.8994	High	7.29	7.54	0.618	5.516	0.9004	High	7.29	7.53	0.583	5.206	0.9128	High	7.29	7.54	1.554	13.874	0.8975	High	7.29	7.54	1.546	13.804	0.9098	High	7.29	7.53	1.54	13.746	0.9046	High	7.29	7.54	2.4	21.424	0.8986	Medium	7.29
B_CD + FGFR	747	758	YRKMKLRYPINE	7.16	4	9	7.21	7.34	0.612	9.715	0.9403	High	7.21	7.34	0.614	9.748	0.9396	High	7.21	7.34	0.584	9.277	0.9358	High	7.21	7.34	1.064	16.894	0.9248	High	7.21	7.34	1.041	16.523	0.9372	High	7.2	7.34	1.05	16.66	0.9273	High	7.21	7.34	1.361	21.61	0.9321	High	7.21
B_CD + FGFR	761	774	LEKIGTAEPDYGAL	9.85	2	11	9.71	10.32	3.604	46.811	0.8955	Medium	9.71	10.31	3.648	47.381	0.8932	Medium	9.71	10.31	3.43	44.551	0.8987	Medium	9.71	10.32	5.493	71.343	0.879	Medium	9.71	10.31	5.472	71.065	0.8904	Medium	9.71	10.32	5.385	69.929	0.8877	Medium	9.71	10.32	5.486	71.25	0.9021	Medium	9.71
B_CD + FGFR	762	774	EKIGTAEPDYGAL	9.35	2	10	9.21	9.97	3.411	48.735	0.8814	High	9.21	9.97	3.45	49.288	0.8826	High	9.21	9.97	3.28	46.863	0.8803	High	9.22	9.97	4.974	71.064	0.8883	High	9.21	9.97	4.974	71.059	0.8829	High	9.22	9.97	4.901	70.009	0.8774	High	9.22	9.97	4.942	70.597	0.8673	High	9.21
B_CD + FGFR	775	782	YEGRNPGF	7.69	1	5	7.55	8.02	2.446	69.882	0.9343	High	7.55	8.02	2.413	68.935	0.929	High	7.55	8.02	2.353	67.217	0.9345	High	7.55	8.02	2.567	73.353	0.9327	High	7.55	8.02	2.565	73.279	0.9189	High	7.55	8.02	2.555	73.009	0.917	High	7.55	8.02	2.518	71.938	0.9252	High	7.55
B_CD + FGFR	783	792	YVEANPMPTF	11.57	1	6	11.17	12.01	3.078	73.293	0.921	High	11.16	12	3.087	73.51	0.9328	High	11.16	12	2.942	70.056	0.9256	High	11.16	12	3.436	81.808	0.9287	High	11.16	12	3.433	81.741	0.9149	High	11.17	12.01	3.394	80.801	0.9265	High	11.16	12	3.365	80.125	0.9227	High	11.16
B_CD + FGFR	783	801	YVEANPMPTFKCAVKALFD	13.3	3	15	13.36	13.46	3.656	34.821	0.8684	Medium	13.36	13.46	3.597	34.26	0.8166	Medium	13.36	13.46	3.49	33.238	0.8481	Medium	13.36	13.46	4.458	42.461	0.8315	Medium	13.36	13.46	4.436	42.246	0.8017	Medium	13.36	13.46	4.35	41.425	0.8117	Medium	13.36	13.46	4.894	46.606	0.8204	Medium	13.36
B_CD + FGFR	793	800	KCAVKALF	9.3	1	6	9.16	9.44	0.064	1.514	0.9119	Medium	9.16	9.43	0.054	1.279	0.9162	Medium	9.16	9.43	0.061	1.444	0.9266	Medium	9.16	9.43	0.206	4.909	0.9227	Medium	9.16	9.43	0.216	5.135	0.9027	Medium	9.16	9.44	0.199	4.732	0.9133	Medium	9.17	9.43	0.396	9.434	0.8972	Medium	9.16
B_CD + FGFR	793	801	KCAVKALFD	8.87	2	7	8.7	9.29	0.127	2.587	0.8651	Medium	8.7	9.3	0.089	1.819	0.8772	Medium	8.7	9.3	0.087	1.778	0.8754	Medium	8.7	9.3	0.244	4.981	0.8697	Medium	8.7	9.3	0.272	5.542	0.8768	Medium	8.7	9.29	0.235	4.796	0.8698	Medium	8.7	9.3	0.686	14.009	0.8803	Medium	8.7
B_CD + FGFR	801	809	DYKAQREDE	4.2	2	7	4.17	4.56	0.749	15.294	0.9343	High	4.18	4.56	0.753	15.364	0.9324	High	4.18	4.56	0.71	14.495	0.9401	High	4.18	4.56	1.825	37.252	0.9204	High	4.18	4.56	1.782	36.362	0.8727	Medium	4.18	4.57	1.753	35.785	0.8782	High	4.18	4.56	2.711	55.328	0.9093	High	4.18
B_CD + FGFR	801	810	DYKAQREDEL	7.06	2	8	6.92	7.32	0.754	13.468	0.9105	High	6.92	7.33	0.751	13.408	0.8883	High	6.92	7.33	0.708	12.646	0.9132	High	6.92	7.33	1.659	29.621	0.8989	Medium	6.92	7.33	1.658	29.61	0.8881	Medium	6.92	7.32	1.626	29.04	0.9006	High	6.92	7.33	2.508	44.779	0.8491	Medium	6.92
B_CD + FGFR	802	809	YKAQREDE	3.88	2	6	3.75	4.06	0.666	15.866	0.929	Medium	3.76	4.06	0.657	15.648	0.9456	Medium	3.76	4.06	0.64	15.246	0.9535	Medium	3.76	4.06	1.339	31.888	0.9275	Medium	3.76	4.06	1.327	31.599	0.9263	Medium	3.76	4.06	1.304	31.043	0.9396	Medium	3.76	4.06	2.023	48.173	0.9284	Medium	3.76
B_CD + FGFR	802	810	YKAQREDEL	6.28	2	7	6.25	6.59	0.64	13.067	0.9161	Medium	6.25	6.6	0.641	13.081	0.9007	Medium	6.25	6.59	0.621	12.675	0.9034	Medium	6.25	6.6	1.183	24.151	0.8945	Medium	6.25	6.6	1.174	23.966	0.9065	Medium	6.25	6.59	1.135	23.161	0.8943	Medium	6.25	6.6	1.773	36.186	0.8923	Medium	6.25
B_CD + FGFR	802	811	YKAQREDELT	5.62	2	8	5.6	6.04	0.658	11.748	0.8896	Medium	5.6	6.04	0.603	10.769	0.9283	High	5.6	6.04	0.612	10.922	0.9278	High	5.6	6.04	1.218	21.746	0.9261	High	5.6	6.04	1.198	21.397	0.9261	High	5.6	6.04	1.167	20.844	0.9264	High	5.61	6.04	1.893	33.812	0.9076	Medium	5.6
B_CD + FGFR	810	819	LTFTKSAIIQ	9.41	2	8	9.32	9.55	0.088	1.576	0.9226	Medium	9.31	9.55	0.083	1.488	0.9365	Medium	9.31	9.55	0.078	1.394	0.9389	Medium	9.32	9.55	0.431	7.698	0.9317	Medium	9.31	9.55	0.445	7.945	0.9242	Medium	9.31	9.55	0.426	7.601	0.9191	Medium	9.32	9.55	1.225	21.881	0.8989	Medium	9.31
B_CD + FGFR	810	828	LTFTKSAIIQNVEKQDGGW	11	3	17	10.93	11.44	1.656	13.918	0.887	High	10.93	11.44	1.637	13.758	0.9034	High	10.93	11.44	1.591	13.374	0.8964	High	10.93	11.44	2.811	23.625	0.8897	High	10.92	11.44	2.762	23.206	0.8963	High	10.93	11.44	2.735	22.984	0.8945	High	10.93	11.44	4.354	36.589	0.8864	High	10.92
B_CD + FGFR	811	819	TFTKSAIIQ	7.81	1	7	7.73	8.02	0.063	1.295	0.9167	High	7.74	8.02	0.051	1.034	0.9214	High	7.74	8.02	0.064	1.315	0.9089	High	7.74	8.02	0.413	8.437	0.9363	High	7.74	8.02	0.389	7.934	0.9368	High	7.73	8.02	0.395	8.056	0.9349	High	7.74	8.02	1.114	22.726	0.9156	High	7.74
B_CD + FGFR	811	822	TFTKSAIIQNVE	8.74	2	10	8.75	8.82	0.145	2.065	0.829	Medium	8.75	8.82	0.152	2.168	0.8782	Medium	8.75	8.82	0.124	1.773	0.8701	Medium	8.75	8.82	0.581	8.295	0.868	Medium	8.75	8.82	0.623	8.902	0.8374	Medium	8.75	8.82	0.571	8.158	0.8612	Medium	8.75	8.82	1.616	23.093	0.824	Medium	8.75
B_CD + FGFR	811	828	TFTKSAIIQNVEKQDGGW	10.4	3	16	10.3	10.79	1.662	14.836	0.9355	High	10.3	10.81	1.659	14.814	0.9379	High	10.3	10.81	1.589	14.188	0.9332	High	10.3	10.81	2.79	24.912	0.9255	High	10.3	10.81	2.747	24.529	0.9315	High	10.3	10.81	2.688	24	0.916	High	10.3	10.81	4.195	37.455	0.9307	High	10.3
B_CD + FGFR	812	820	FTKSAIIQN	6.83	1	7	6.73	6.94	0.093	1.901	0.8844	Medium	6.73	6.94	0.085	1.738	0.889	Medium	6.73	6.94	0.058	1.175	0.8965	Medium	6.73	6.94	0.481	9.825	0.8975	Medium	6.73	6.94	0.482	9.833	0.8763	Medium	6.72	6.93	0.506	10.325	0.8816	Medium	6.73	6.94	1.287	26.27	0.8949	Medium	6.73
B_CD + FGFR	812	828	FTKSAIIQNVEKQDGGW	10.17	3	15	10.08	10.62	1.654	15.749	0.9187	High	10.07	10.62	1.653	15.74	0.9236	High	10.07	10.61	1.599	15.233	0.9219	High	10.07	10.62	2.762	26.308	0.9201	High	10.07	10.61	2.717	25.873	0.9215	High	10.08	10.61	2.66	25.336	0.9202	High	10.07	10.62	4.089	38.94	0.9243	High	10.07
B_CD + FGFR	829	844	WRGDYGGKKQLWFPSN	9.74	3	13	9.71	10.18	1.054	11.584	0.8856	High	9.71	10.18	1.009	11.091	0.9053	High	9.71	10.18	0.964	10.596	0.9059	High	9.71	10.18	1.447	15.905	0.9009	High	9.71	10.18	1.386	15.227	0.9075	High	9.71	10.18	1.382	15.187	0.9043	High	9.71	10.18	1.655	18.188	0.8932	High	9.71
B_CD + FGFR	829	845	WRGDYGGKKQLWFPSNY	10.66	4	14	10.46	11.05	0.857	8.746	0.9506	High	10.46	11.04	0.855	8.724	0.9421	High	10.46	11.04	0.794	8.1	0.9501	High	10.46	11.05	1.238	12.632	0.9455	High	10.45	11.04	1.179	12.029	0.9477	High	10.46	11.05	1.184	12.079	0.9503	High	10.46	11.05	1.523	15.54	0.9375	High	10.45
B_CD + FGFR	849	860	MINPAILEPERE	10.22	2	8	10.17	10.28	3.423	61.124	0.913	High	10.16	10.27	3.505	62.595	0.7814	Medium	10.16	10.27	3.286	58.68	0.9222	High	10.16	10.27	4.835	86.335	0.9153	High	10.16	10.27	4.849	86.595	0.9052	High	10.17	10.28	4.765	85.086	0.908	High	10.16	10.27	4.733	84.521	0.9206	High	10.16
B_CD + FGFR	849	862	MINPAILEPEREHL	10.28	3	10	9.81	10.75	3.581	51.163	0.9307	High	9.81	10.75	3.6	51.422	0.9078	High	9.81	10.75	3.428	48.975	0.9193	High	9.81	10.75	5.021	71.728	0.928	High	9.81	10.75	4.981	71.152	0.9272	High	9.82	10.76	4.913	70.179	0.9213	High	9.81	10.75	4.877	69.666	0.9287	High	9.81
B_CD + FGFR	849	871	MINPAILEPEREHLDENSPLGDL	12.05	3	18	11.65	12.46	4.399	34.91	0.8841	High	11.65	12.45	4.474	35.51	0.8812	High	11.65	12.46	4.248	33.716	0.8871	High	11.65	12.46	6.914	54.873	0.8859	High	11.65	12.46	6.846	54.329	0.8924	High	11.65	12.46	6.834	54.237	0.8797	Medium	11.65	12.46	7.271	57.709	0.8877	High	11.65
B_CD + FGFR	849	872	MINPAILEPEREHLDENSPLGDLL	13.09	3	19	13	13.11	4.147	31.179	0.9192	High	13	13.12	4.237	31.854	0.9145	High	13	13.12	3.992	30.016	0.9141	High	12.99	13.11	6.655	50.041	0.8901	High	13	13.12	6.694	50.331	0.9225	High	13	13.12	6.649	49.992	0.9226	High	13	13.11	7.376	55.455	0.894	High	13
B_CD + FGFR	849	876	MINPAILEPEREHLDENSPLGDLLRGVL	14.06	4	23	13.68	14.25	3.568	22.163	0.921	High	13.69	14.26	3.566	22.148	0.9292	High	13.69	14.26	3.369	20.923	0.9242	High	13.68	14.25	6.761	41.993	0.9276	High	13.69	14.26	6.621	41.122	0.903	High	13.69	14.26	6.692	41.565	0.9296	High	13.68	14.25	8.268	51.356	0.9256	High	13.68
B_CD + FGFR	856	871	EPEREHLDENSPLGDL	10.34	3	13	10.28	10.35	1.817	19.964	0.8725	Medium	10.28	10.35	1.745	19.176	0.892	Medium	10.28	10.35	1.651	18.143	0.8834	Medium	10.28	10.35	2.928	32.173	0.8859	Medium	10.28	10.35	2.871	31.546	0.8707	Medium	10.29	10.35	2.88	31.648	0.8757	Medium	10.28	10.35	3.321	36.498	0.8885	Medium	10.28
B_CD + FGFR	856	876	EPEREHLDENSPLGDLLRGVL	13.81	3	18	13.76	13.92	1.17	9.285	0.9113	High	13.76	13.92	1.24	9.84	0.9214	High	13.76	13.92	1.107	8.789	0.9174	High	13.76	13.92	3.295	26.151	0.889	High	13.76	13.92	3.371	26.757	0.8741	High	13.76	13.92	3.205	25.436	0.8883	High	13.76	13.92	4.677	37.119	0.9036	High	13.76
B_CD + FGFR	861	872	HLDENSPLGDLL	12.73	2	9	12.6	12.72	1.032	16.387	0.8603	Medium	12.6	12.72	1.012	16.066	0.8603	Medium	12.6	12.72	0.929	14.741	0.8868	Medium	12.6	12.72	2.202	34.955	0.8913	Medium	12.6	12.72	2.142	34.004	0.8775	Medium	12.6	12.72	2.157	34.234	0.8965	Medium	12.6	12.72	2.898	45.994	0.9111	Medium	12.6
B_CD + FGFR	861	876	HLDENSPLGDLLRGVL	13.97	3	13	13.88	14.26	0.832	9.148	0.9587	High	13.87	14.26	0.863	9.479	0.9339	High	13.86	14.26	0.808	8.876	0.9496	High	13.88	14.26	2.852	31.339	0.9108	High	13.88	14.26	2.81	30.883	0.858	Medium	13.86	14.27	2.869	31.528	0.9069	High	13.86	14.26	4.359	47.905	0.9553	High	13.86
B_CD + FGFR	863	871	DENSPLGDL	11.52	1	6	11.3	11.77	0.82	19.522	0.7831	Medium	11.3	11.76	0.836	19.895	0.8241	Medium	11.29	11.76	0.766	18.243	0.8038	Medium	11.3	11.77	1.93	45.946	0.8053	Medium	11.29	11.76	1.815	43.222	0.8037	Medium	11.3	11.77	1.854	44.149	0.7991	Medium	11.3	11.77	2.275	54.175	0.819	Medium	11.29
B_CD + FGFR	863	872	DENSPLGDLL	13.35	1	7	13.26	13.44	0.904	18.441	0.9002	Medium	13.26	13.44	0.806	16.446	0.9236	Medium	13.26	13.44	0.808	16.482	0.9225	Medium	13.25	13.44	1.968	40.163	0.9167	Medium	13.26	13.44	1.916	39.112	0.8959	Medium	13.26	13.44	1.956	39.915	0.9138	Medium	13.26	13.44	2.625	53.571	0.9229	Medium	13.26
B_CD + FGFR	863	876	DENSPLGDLLRGVL	14.32	2	11	14.13	14.49	0.69	8.963	0.8817	Medium	14.13	14.49	0.719	9.344	0.888	Medium	14.13	14.49	0.679	8.818	0.8858	Medium	14.13	14.49	2.688	34.908	0.8562	Medium	14.13	14.49	2.553	33.158	0.8286	Medium	14.13	14.49	2.643	34.322	0.8579	Medium	14.13	14.49	4.153	53.93	0.8654	Medium	14.13
B_CD + FGFR	872	882	LRGVLDVPACQ	9.69	2	8	9.67	9.96	0.166	2.967	0.8699	Medium	9.67	9.95	0.158	2.821	0.8463	Medium	9.67	9.95	0.14	2.492	0.8586	Medium	9.67	9.95	0.797	14.233	0.8124	Medium	9.67	9.95	0.786	14.033	0.8151	Medium	9.66	9.96	0.74	13.216	0.8062	Medium	9.67	9.96	1.693	30.234	0.7811	Medium	9.67
B_CD + FGFR	877	882	DVPACQ	5.3	1	3	5.1	5.66	0.046	2.211	0.926	High	5.1	5.66	0.053	2.52	0.9294	High	5.1	5.66	0.051	2.437	0.9275	High	5.1	5.66	0.205	9.746	0.9318	High	5.1	5.66	0.201	9.576	0.9303	High	5.09	5.66	0.213	10.119	0.9171	High	5.1	5.66	0.58	27.617	0.9302	High	5.1
B_CD + FGFR	883	894	IAIRPEGKNNRL	6.19	3	9	5.97	6.52	2.347	37.252	0.9316	High	5.97	6.52	2.329	36.964	0.9264	High	5.97	6.52	2.22	35.234	0.9258	High	5.97	6.52	3.41	54.134	0.9229	High	5.97	6.52	3.415	54.213	0.9206	High	5.97	6.51	3.348	53.135	0.9182	High	5.98	6.52	3.812	60.503	0.926	High	5.97
B_CD + FGFR	883	896	IAIRPEGKNNRLFV	8.61	4	11	8.77	8.83	2.043	26.53	0.9419	High	8.77	8.84	2.04	26.497	0.9301	High	8.77	8.84	1.956	25.4	0.9374	High	8.77	8.84	3.217	41.774	0.9181	Medium	8.77	8.84	3.204	41.615	0.9198	High	8.77	8.84	3.16	41.037	0.9094	Medium	8.77	8.84	3.79	49.22	0.9278	High	8.77
B_CD + FGFR	898	906	SISMPSVAQ	8.93	1	6	8.93	8.99	2.066	49.188	0.8499	Medium	8.94	9	2.062	49.106	0.8517	Medium	8.94	9	1.974	47.005	0.8721	Medium	8.94	9	2.617	62.303	0.8503	Medium	8.94	8.99	2.645	62.968	0.8364	Medium	8.93	8.99	2.601	61.939	0.8396	Medium	8.94	9	2.917	69.446	0.8469	Medium	8.94
B_CD + FGFR	898	909	SISMPSVAQWSL	13.51	1	9	13.39	13.81	2.221	35.259	0.8942	Medium	13.39	13.81	2.258	35.846	0.8929	Medium	13.39	13.81	2.139	33.948	0.902	Medium	13.39	13.81	3.546	56.28	0.8811	Medium	13.39	13.81	3.509	55.704	0.8109	Medium	13.39	13.81	3.552	56.386	0.86	Medium	13.39	13.81	3.998	63.468	0.8845	Medium	13.39
B_CD + FGFR	902	909	PSVAQWSL	12.36	1	6	12.11	12.56	1.764	41.997	0.8781	Medium	12.11	12.55	1.798	42.81	0.884	High	12.11	12.56	1.697	40.4	0.8761	Medium	12.11	12.56	3.126	74.419	0.8738	Medium	12.11	12.56	3.112	74.098	0.8623	Medium	12.12	12.56	3.099	73.782	0.8764	Medium	12.11	12.56	3.234	77.01	0.8818	High	12.12
B_CD + FGFR	910	916	DVAADSQ	3.94	1	5	3.95	4.11	0.606	17.316	0.9121	Medium	3.95	4.11	0.605	17.287	0.9028	Medium	3.95	4.11	0.555	15.868	0.9275	Medium	3.95	4.11	1.15	32.863	0.917	Medium	3.95	4.11	1.133	32.361	0.9047	Medium	3.95	4.11	1.16	33.155	0.909	Medium	3.95	4.11	1.545	44.15	0.918	Medium	3.95
B_CD + FGFR	911	917	VAADSQE	3.88	1	5	3.98	4.05	0.904	25.824	0.8062	Medium	3.98	4.05	0.839	23.98	0.8523	Medium	3.98	4.05	0.778	22.231	0.8502	Medium	3.98	4.05	1.712	48.925	0.827	Medium	3.98	4.05	1.711	48.887	0.7996	Medium	3.99	4.05	1.727	49.333	0.8332	Medium	3.98	4.05	2.055	58.702	0.8046	Medium	3.98
B_CD + FGFR	917	921	EELQD	5.82	1	3	5.7	6.14	0.032	1.538	0.7982	Medium	5.71	6.14	0.036	1.697	0.8083	Medium	5.7	6.14	0.04	1.921	0.8121	Medium	5.7	6.14	0.042	2.017	0.8263	Medium	5.71	6.14	0.036	1.726	0.831	Medium	5.7	6.14	0.055	2.617	0.8157	Medium	5.71	6.14	0.077	3.671	0.8532	Medium	5.7
B_CD + FGFR	922	928	WVKKIRE	4.93	2	5	4.9	5.28	0.037	1.067	0.9549	Medium	4.9	5.29	0.031	0.896	0.9653	Medium	4.9	5.29	0.033	0.957	0.9633	Medium	4.9	5.28	0.032	0.902	0.962	Medium	4.9	5.29	0.042	1.19	0.9554	Medium	4.89	5.28	0.041	1.181	0.9237	Medium	4.9	5.29	0.113	3.233	0.8878	Medium	4.9
B_CD + FGFR	922	934	WVKKIREVAQTAD	6.52	2	11	6.36	6.77	1.628	21.149	0.9443	High	6.36	6.77	1.631	21.185	0.9443	High	6.36	6.77	1.55	20.135	0.9396	High	6.36	6.77	2.544	33.033	0.9354	High	6.36	6.77	2.538	32.955	0.9359	High	6.36	6.77	2.526	32.8	0.9374	High	6.36	6.77	3.125	40.591	0.9321	High	6.36
B_CD + FGFR	922	935	WVKKIREVAQTADA	6.85	2	12	6.88	7.04	2.069	24.632	0.9305	Medium	6.88	7.04	2.073	24.677	0.9313	High	6.88	7.04	1.981	23.581	0.9392	High	6.88	7.04	2.977	35.441	0.9167	High	6.88	7.04	2.985	35.539	0.9236	High	6.88	7.04	2.976	35.433	0.9281	High	6.88	7.04	3.524	41.954	0.9139	Medium	6.88
B_CD + FGFR	929	935	VAQTADA	4.03	1	5	4.02	4.19	2.138	61.083	0.8236	Medium	4.02	4.19	2.113	60.385	0.8303	Medium	4.02	4.19	2.036	58.177	0.8526	Medium	4.02	4.19	2.851	81.446	0.8509	Medium	4.02	4.19	2.846	81.321	0.7939	Medium	4.02	4.2	2.829	80.816	0.798	Medium	4.02	4.19	2.905	83.011	0.817	Medium	4.02
B_CD + FGFR	929	937	VAQTADARL	6.67	2	7	6.54	6.72	3.471	70.829	0.8127	Medium	6.54	6.72	3.472	70.856	0.816	Medium	6.54	6.72	3.342	68.199	0.8008	Medium	6.55	6.72	4.172	85.148	0.8453	Medium	6.54	6.72	4.189	85.485	0.8181	Medium	6.54	6.72	4.165	85.003	0.8261	Medium	6.55	6.72	4.204	85.798	0.8419	Medium	6.54
B_CD + FGFR	938	942	TEGKM	3.89	1	3	3.91	4.18	1.701	81.006	0.8961	Medium	3.91	4.19	1.685	80.228	0.8883	Medium	3.91	4.18	1.617	76.982	0.8926	Medium	3.91	4.18	1.715	81.651	0.8991	Medium	3.91	4.19	1.716	81.699	0.8789	Medium	3.91	4.19	1.709	81.395	0.8898	Medium	3.91	4.19	1.693	80.627	0.8921	Medium	3.91
B_CD + FGFR	938	953	TEGKMMERRKKIALEL	7.43	4	14	7.48	7.56	3.02	30.816	0.8889	Medium	7.49	7.56	2.954	30.14	0.9023	Medium	7.48	7.56	2.892	29.511	0.8969	Medium	7.49	7.56	3.891	39.705	0.9051	Medium	7.48	7.56	3.922	40.022	0.9077	Medium	7.48	7.56	3.873	39.521	0.8995	Medium	7.49	7.56	4.169	42.537	0.9177	Medium	7.48
B_CD + FGFR	943	951	MERRKKIAL	4.84	2	7	4.85	5.18	1.952	39.834	0.9553	Medium	4.86	5.18	1.947	39.736	0.9552	Medium	4.86	5.18	1.88	38.363	0.9615	Medium	4.85	5.18	2.484	50.685	0.9437	Medium	4.86	5.19	2.478	50.581	0.9515	Medium	4.85	5.18	2.476	50.528	0.9502	Medium	4.86	5.19	2.703	55.173	0.9535	Medium	4.86
B_CD + FGFR	945	953	RRKKIALEL	7.11	3	7	7.06	7.34	1.097	22.382	0.8851	Medium	7.07	7.34	1.137	23.206	0.855	Medium	7.06	7.34	1.07	21.832	0.8915	Medium	7.07	7.34	1.994	40.701	0.8946	Medium	7.07	7.34	1.953	39.848	0.898	Medium	7.06	7.34	1.979	40.383	0.9098	Medium	7.07	7.34	2.315	47.244	0.9025	Medium	7.06
B_CD + FGFR	957	968	VVYCRPVPFDEE	10.06	2	8	9.78	10.26	1.027	18.334	0.8342	Medium	9.78	10.25	0.94	16.789	0.8292	Medium	9.78	10.25	0.907	16.196	0.8193	Medium	9.78	10.26	1.338	23.89	0.8265	Medium	9.78	10.25	1.32	23.567	0.84	Medium	9.78	10.26	1.33	23.742	0.8263	Medium	9.78	10.26	1.55	27.672	0.8317	Medium	9.77
B_CD + FGFR	957	976	VVYCRPVPFDEEKIGTERAC	9.15	3	16	9.17	9.27	2.638	23.55	0.9145	Medium	9.17	9.27	2.606	23.271	0.8844	Medium	9.17	9.27	2.499	22.31	0.9059	Medium	9.17	9.27	4.367	38.988	0.87	Medium	9.17	9.27	4.31	38.484	0.8708	Medium	9.18	9.27	4.322	38.589	0.8645	Medium	9.17	9.27	5.338	47.664	0.8529	Medium	9.17
B_CD + FGFR	959	967	YCRPVPFDE	9.14	2	5	9	9.1	0.935	26.703	0.8721	Medium	9	9.1	0.913	26.086	0.9096	Medium	9	9.1	0.892	25.49	0.9086	Medium	9.01	9.11	1.01	28.866	0.9285	Medium	9	9.1	0.991	28.313	0.9118	Medium	9	9.11	1	28.558	0.9274	Medium	9.01	9.11	1.093	31.237	0.9262	Medium	9
B_CD + FGFR	968	976	EKIGTERAC	4.72	2	7	4.8	4.85	2.041	41.649	0.9411	High	4.81	4.85	2.026	41.346	0.9466	High	4.81	4.85	1.957	39.941	0.9433	High	4.8	4.85	3.355	68.469	0.9462	High	4.81	4.85	3.346	68.29	0.9398	High	4.8	4.84	3.344	68.241	0.9372	High	4.81	4.85	3.729	76.096	0.9492	High	4.81
B_CD + FGFR	977	1003	YRDMSSFPETKAEKYVNKAKGKKFLQY	8.44	5	24	8.1	8.81	1.128	6.714	0.9002	High	8.11	8.81	1.139	6.78	0.9071	High	8.11	8.81	1.07	6.368	0.9088	High	8.11	8.81	2.769	16.484	0.9002	High	8.11	8.81	2.758	16.418	0.9051	High	8.1	8.82	2.696	16.049	0.8935	High	8.11	8.81	4.226	25.153	0.8972	High	8.11
B_CD + FGFR	978	983	RDMSSF	7.96	1	4	7.93	8.02	0.271	9.675	0.8528	Medium	7.93	8.02	0.302	10.794	0.8623	Medium	7.93	8.02	0.254	9.085	0.8483	Medium	7.93	8.02	0.526	18.795	0.8388	Medium	7.93	8.02	0.538	19.208	0.8374	Medium	7.93	8.02	0.52	18.56	0.85	Medium	7.93	8.02	0.688	24.581	0.8527	Medium	7.93
B_CD + FGFR	978	1008	RDMSSFPETKAEKYVNKAKGKKFLQYNRLQL	8.77	4	28	8.58	9.11	1.009	5.149	0.9532	High	8.58	9.11	1.01	5.152	0.9493	High	8.58	9.11	0.981	5.007	0.9453	High	8.59	9.11	2.469	12.596	0.9455	High	8.58	9.11	2.385	12.171	0.943	High	8.58	9.11	2.39	12.192	0.9453	High	8.59	9.12	3.7	18.877	0.9339	High	8.58
B_CD + FGFR	984	1008	PETKAEKYVNKAKGKKFLQYNRLQL	8.01	4	23	7.95	8.05	0.789	4.903	0.9305	High	7.95	8.06	0.804	4.995	0.949	High	7.95	8.06	0.778	4.832	0.9559	High	7.96	8.06	1.946	12.084	0.955	High	7.95	8.06	1.936	12.022	0.9452	High	7.95	8.05	1.912	11.874	0.952	High	7.96	8.06	3.196	19.853	0.9415	High	7.95
B_CD + FGFR	987	1003	KAEKYVNKAKGKKFLQY	5.89	4	15	5.91	6.02	0.518	4.93	0.8156	Medium	5.92	6.02	0.485	4.616	0.8263	Medium	5.91	6.02	0.47	4.478	0.814	Medium	5.91	6.02	1.379	13.133	0.8021	Medium	5.92	6.02	1.335	12.719	0.7969	Medium	5.91	6.02	1.337	12.73	0.8154	Medium	5.92	6.03	2.243	21.366	0.783	Medium	5.91
B_CD + FGFR	1009	1018	SRIYPKGQRL	5.55	3	7	5.47	6.02	1.022	20.867	0.9376	High	5.47	6.02	1.033	21.086	0.9445	High	5.47	6.02	0.981	20.021	0.9458	High	5.47	6.02	1.861	37.979	0.9457	High	5.47	6.02	1.83	37.346	0.9474	High	5.46	6.02	1.81	36.946	0.9396	High	5.47	6.03	2.358	48.128	0.9475	High	5.47
B_CD + FGFR	1009	1022	SRIYPKGQRLDSSN	5.04	3	11	5.04	5.17	1.324	17.2	0.8962	Medium	5.04	5.17	1.244	16.159	0.8483	Medium	5.04	5.17	1.217	15.808	0.8857	Medium	5.04	5.16	2.522	32.749	0.8839	High	5.04	5.17	2.533	32.894	0.9039	High	5.04	5.16	2.524	32.775	0.8994	High	5.04	5.17	3.591	46.635	0.9017	High	5.04
B_CD + FGFR	1009	1029	SRIYPKGQRLDSSNYDPLPMW	11.46	4	16	11.21	11.9	0.994	8.873	0.8905	High	11.2	11.89	0.948	8.464	0.88	Medium	11.2	11.89	0.885	7.902	0.8851	High	11.21	11.89	1.848	16.501	0.8688	Medium	11.2	11.89	1.738	15.522	0.8746	High	11.21	11.9	1.756	15.68	0.8764	Medium	11.21	11.9	2.394	21.378	0.8449	Medium	11.2
B_CD + FGFR	1009	1032	SRIYPKGQRLDSSNYDPLPMWICG	12.63	4	19	12.38	12.89	0.605	4.546	0.9138	High	12.38	12.89	0.575	4.322	0.8864	High	12.39	12.89	0.571	4.29	0.9168	High	12.38	12.89	1.198	9.009	0.8829	High	12.39	12.89	1.195	8.986	0.8631	Medium	12.39	12.89	1.258	9.46	0.8815	High	12.38	12.89	1.815	13.645	0.8405	Medium	12.38
B_CD + FGFR	1009	1035	SRIYPKGQRLDSSNYDPLPMWICGSQL	13.04	3	22	12.74	13.34	0.599	3.888	0.9621	High	12.74	13.34	0.558	3.622	0.9535	High	12.74	13.34	0.566	3.675	0.9557	High	12.73	13.34	1.193	7.748	0.9557	High	12.74	13.34	1.164	7.558	0.9467	High	12.74	13.34	1.173	7.614	0.9568	High	12.73	13.34	1.744	11.322	0.9545	High	12.74
B_CD + FGFR	1012	1018	YPKGQRL	5.61	2	5	5.6	5.73	0.9	25.71	0.7026	Medium	5.6	5.73	0.984	28.112	0.7695	Medium	5.6	5.73	0.807	23.057	0.7462	Medium	5.6	5.73	1.624	46.401	0.7842	Medium	5.6	5.73	1.608	45.948	0.7578	Medium	5.6	5.72	1.57	44.845	0.7594	Medium	5.61	5.73	2.059	58.825	0.7626	Medium	5.6
B_CD + FGFR	1019	1028	DSSNYDPLPM	11.16	1	6	11.12	11.36	0.001	0.013	0.8393	Medium	11.12	11.35	0.015	0.354	0.822	Medium	11.12	11.35	0.002	0.047	0.8411	Medium	11.12	11.36	0.085	2.032	0.8295	Medium	11.12	11.35	0.001	0.034	0.8369	Medium	11.13	11.36	0.07	1.656	0.7947	Medium	11.12	11.36	0.226	5.382	0.8496	Medium	11.12
B_CD + FGFR	1019	1029	DSSNYDPLPMW	14.02	1	7	13.9	14.25	0.035	0.724	0.9128	Medium	13.9	14.25	0.049	1.001	0.9188	High	13.9	14.25	0.044	0.908	0.9266	High	13.9	14.25	0.06	1.23	0.9209	High	13.9	14.25	0.024	0.495	0.899	Medium	13.9	14.25	0.052	1.062	0.9119	High	13.9	14.25	0.154	3.146	0.9255	High	13.9
B_CD + FGFR	1029	1035	WICGSQL	11.9	1	5	11.85	11.94	0.092	2.625	0.7679	Medium	11.84	11.93	0.059	1.693	0.7996	Medium	11.84	11.93	0.052	1.485	0.7979	Medium	11.84	11.94	0.064	1.827	0.7958	Medium	11.84	11.93	0.049	1.387	0.7649	Medium	11.85	11.94	0.067	1.914	0.7824	Medium	11.84	11.94	0.064	1.835	0.8031	Medium	11.85
B_CD + FGFR	1030	1035	ICGSQL	8.33	1	4	8.33	8.52	0.014	0.49	0.8016	Medium	8.33	8.53	0.046	1.639	0.8208	Medium	8.33	8.53	0.047	1.695	0.8135	Medium	8.33	8.53	0.016	0.554	0.8006	Medium	8.33	8.53	0.041	1.464	0.8107	Medium	8.33	8.52	0.045	1.614	0.8119	Medium	8.33	8.53	0.036	1.303	0.8213	Medium	8.33
B_CD + FGFR	1036	1049	VALNFQTPDKPMQM	10.61	2	10	10.35	10.96	0.241	3.439	0.9093	High	10.35	10.95	0.267	3.814	0.914	High	10.35	10.95	0.246	3.509	0.9109	High	10.35	10.95	0.552	7.892	0.909	High	10.35	10.95	0.557	7.962	0.8672	Medium	10.35	10.96	0.535	7.643	0.9157	High	10.35	10.95	0.635	9.071	0.8998	High	10.35
B_CD + FGFR	1039	1049	NFQTPDKPMQM	9.19	2	7	9.19	9.4	0.244	4.976	0.8885	High	9.2	9.4	0.264	5.381	0.8919	High	9.2	9.4	0.262	5.348	0.8883	High	9.2	9.4	0.576	11.747	0.8916	High	9.2	9.4	0.572	11.669	0.8865	Medium	9.2	9.4	0.555	11.318	0.8895	High	9.2	9.4	0.543	11.082	0.8303	Medium	9.2
B_CD + FGFR	1050	1054	NQALF	10.82	1	3	10.74	10.99	0.032	1.5	0.8511	Medium	10.73	10.98	0.035	1.667	0.8476	Medium	10.73	10.98	0.02	0.929	0.8572	Medium	10.73	10.99	0.026	1.261	0.8479	Medium	10.73	10.98	0.036	1.708	0.8581	Medium	10.74	10.99	0.031	1.481	0.8561	Medium	10.74	10.99	0.03	1.433	0.8482	Medium	10.73
B_CD + FGFR	1054	1068	FMAGGHCGYVLQPST	9.52	2	12	9.48	9.66	1.078	12.835	0.9339	High	9.47	9.66	1.068	12.708	0.9017	High	9.47	9.66	1.02	12.146	0.9259	High	9.48	9.66	1.262	15.018	0.9075	High	9.47	9.66	1.278	15.219	0.9259	High	9.48	9.66	1.25	14.887	0.9005	High	9.48	9.66	2.108	25.092	0.8937	High	9.47
B_CD + FGFR	1055	1062	MAGGHCGY	6.2	1	6	6.1	6.37	0.088	2.105	0.8485	Medium	6.1	6.38	0.069	1.642	0.8764	Medium	6.1	6.38	0.083	1.969	0.8775	Medium	6.09	6.38	0.173	4.113	0.8882	Medium	6.1	6.38	0.176	4.187	0.8848	Medium	6.09	6.37	0.201	4.791	0.893	Medium	6.1	6.38	0.736	17.522	0.8756	Medium	6.1
B_CD + FGFR	1055	1068	MAGGHCGYVLQPST	8.45	2	11	8.38	8.52	1.32	17.146	0.7593	Medium	8.38	8.53	1.267	16.454	0.7797	Medium	8.38	8.53	1.21	15.716	0.7872	Medium	8.38	8.53	1.413	18.353	0.79	Medium	8.38	8.53	1.417	18.398	0.765	Medium	8.38	8.52	1.383	17.956	0.7723	Medium	8.38	8.53	1.786	23.192	0.8034	Medium	8.38
B_CD + FGFR	1063	1068	VLQPST	5.66	1	3	5.59	5.69	1.287	61.283	0.8054	Medium	5.59	5.69	1.228	58.453	0.7988	Medium	5.59	5.69	1.211	57.663	0.8032	Medium	5.58	5.68	1.313	62.515	0.7998	Medium	5.59	5.69	1.295	61.674	0.8007	Medium	5.58	5.68	1.292	61.523	0.8035	Medium	5.59	5.69	1.33	63.353	0.795	Medium	5.59
B_CD + FGFR	1063	1069	VLQPSTM	7.96	1	4	7.78	8.2	1.232	43.991	0.8385	Medium	7.79	8.2	1.263	45.099	0.8411	Medium	7.79	8.2	1.207	43.113	0.8362	Medium	7.79	8.2	1.278	45.625	0.8342	Medium	7.79	8.2	1.264	45.156	0.8464	Medium	7.78	8.2	1.255	44.811	0.8406	Medium	7.79	8.2	1.222	43.631	0.8511	Medium	7.79
B_CD + FGFR	1063	1082	VLQPSTMRDEAFDPFDKSSL	11.57	3	16	11.33	11.84	1.494	13.343	0.9098	Medium	11.33	11.83	1.455	12.99	0.9014	Medium	11.33	11.83	1.41	12.59	0.9038	Medium	11.33	11.84	2.498	22.302	0.8865	Medium	11.33	11.83	2.473	22.081	0.8971	Medium	11.34	11.84	2.421	21.62	0.8867	Medium	11.33	11.84	2.8	25.001	0.8835	Medium	11.33
B_CD + FGFR	1069	1082	MRDEAFDPFDKSSL	11.2	3	11	10.99	11.34	0.709	9.213	0.9328	High	10.98	11.34	0.717	9.315	0.9391	High	10.98	11.34	0.66	8.577	0.9337	High	10.99	11.34	1.609	20.89	0.9314	High	10.98	11.34	1.605	20.841	0.9212	High	10.99	11.34	1.541	20.012	0.9263	High	10.99	11.34	1.928	25.038	0.9308	High	10.98
B_CD + FGFR	1070	1082	RDEAFDPFDKSSL	10.93	2	10	10.73	11.15	0.641	9.159	0.9269	Medium	10.72	11.14	0.645	9.219	0.9251	Medium	10.72	11.14	0.608	8.69	0.9169	Medium	10.73	11.15	1.531	21.876	0.9224	Medium	10.72	11.14	1.502	21.45	0.924	Medium	10.73	11.15	1.486	21.223	0.919	Medium	10.73	11.15	1.849	26.411	0.9227	Medium	10.72
B_CD + FGFR	1083	1090	RGLEPCVI	10.13	1	5	10.05	10.19	0.416	11.887	0.8998	Medium	10.04	10.19	0.457	13.068	0.8932	Medium	10.04	10.19	0.409	11.676	0.9108	Medium	10.05	10.19	1.083	30.942	0.893	Medium	10.04	10.19	1.079	30.837	0.8844	Medium	10.05	10.19	1.086	31.022	0.8881	Medium	10.05	10.19	1.166	33.328	0.8854	Medium	10.04
B_CD + FGFR	1083	1091	RGLEPCVIC	10.28	2	6	10.14	10.49	0.475	11.313	0.8886	Medium	10.14	10.49	0.444	10.565	0.9043	High	10.14	10.49	0.507	12.072	0.8682	Medium	10.14	10.49	1.106	26.328	0.8944	Medium	10.14	10.49	1.073	25.553	0.8957	Medium	10.14	10.49	1.08	25.719	0.8938	Medium	10.14	10.49	1.14	27.146	0.8871	Medium	10.14
B_CD + FGFR	1092	1106	IEVLGARHLPKNGRG	6.2	4	12	6.09	6.27	1.147	13.651	0.8769	Medium	6.09	6.28	1.125	13.393	0.886	Medium	6.09	6.28	1.067	12.702	0.9071	Medium	6.09	6.27	1.676	19.949	0.9007	Medium	6.09	6.28	1.613	19.202	0.9086	Medium	6.09	6.27	1.623	19.321	0.9129	Medium	6.09	6.28	1.932	23.004	0.9065	Medium	6.09
B_CD + FGFR	1092	1109	IEVLGARHLPKNGRGIVC	7.9	4	15	7.93	8.02	1.096	10.441	0.9293	High	7.93	8.02	1.071	10.196	0.9252	High	7.93	8.02	1.044	9.946	0.918	High	7.93	8.02	1.815	17.284	0.9217	High	7.93	8.02	1.812	17.256	0.9234	High	7.93	8.02	1.782	16.972	0.9215	High	7.93	8.02	2.329	22.185	0.926	High	7.93
B_CD + FGFR	1092	1115	IEVLGARHLPKNGRGIVCPFVEIE	10.78	5	20	10.92	11.02	0.774	5.527	0.9218	High	10.92	11.02	0.696	4.974	0.9145	High	10.92	11.02	0.647	4.625	0.9189	High	10.92	11.02	1.251	8.936	0.9055	High	10.92	11.02	1.196	8.543	0.9187	High	10.92	11.02	1.183	8.448	0.9045	High	10.92	11.02	1.636	11.689	0.8972	High	10.92
B_CD + FGFR	1110	1115	PFVEIE	10.67	1	4	10.7	10.75	0.038	1.348	0.8219	Medium	10.69	10.75	0.031	1.117	0.8499	Medium	10.69	10.75	0.025	0.879	0.8485	Medium	10.69	10.75	0.035	1.253	0.8068	Medium	10.69	10.75	0.046	1.64	0.8417	Medium	10.7	10.76	0.059	2.122	0.7917	Medium	10.69	10.75	0.029	1.041	0.8206	Medium	10.69
B_CD + FGFR	1114	1120	IEVAGAE	6.46	1	5	6.41	6.67	0.288	8.22	0.9051	Medium	6.41	6.67	0.311	8.881	0.9134	Medium	6.41	6.67	0.283	8.095	0.9096	Medium	6.41	6.67	0.584	16.685	0.9129	Medium	6.41	6.67	0.58	16.562	0.901	Medium	6.41	6.67	0.579	16.53	0.912	Medium	6.41	6.67	0.659	18.841	0.8969	Medium	6.41
B_CD + FGFR	1114	1121	IEVAGAEY	9.14	1	6	9.14	9.2	0.313	7.454	0.8894	Medium	9.14	9.21	0.335	7.984	0.9059	Medium	9.14	9.21	0.32	7.614	0.9128	Medium	9.14	9.21	0.956	22.763	0.8717	Medium	9.14	9.2	0.941	22.414	0.8755	Medium	9.13	9.21	0.953	22.679	0.8737	Medium	9.14	9.21	1.221	29.068	0.8739	Medium	9.14
B_CD + FGFR	1114	1130	IEVAGAEYDSTKQKTEF	8.6	3	15	8.64	8.93	0.55	5.239	0.9423	High	8.64	8.94	0.572	5.451	0.9388	High	8.64	8.94	0.53	5.048	0.938	High	8.64	8.94	1.965	18.714	0.9359	High	8.64	8.94	1.935	18.429	0.9273	High	8.64	8.93	1.919	18.273	0.9317	High	8.64	8.94	3.212	30.592	0.9081	High	8.64
B_CD + FGFR	1122	1130	DSTKQKTEF	6.08	2	7	6.01	6.16	0.301	6.141	0.9057	High	6.02	6.17	0.309	6.299	0.9457	High	6.02	6.17	0.273	5.564	0.94	High	6.01	6.16	1.204	24.562	0.9383	High	6.02	6.17	1.191	24.302	0.9366	High	6.01	6.16	1.172	23.91	0.9366	High	6.02	6.17	2.231	45.54	0.9259	High	6.02
B_CD + FGFR	1131	1137	VVDNGLN	5.92	1	5	5.94	6.06	0.073	2.087	0.9005	High	5.94	6.07	0.079	2.256	0.8896	High	5.94	6.07	0.073	2.08	0.8952	High	5.94	6.06	0.093	2.664	0.885	High	5.94	6.07	0.09	2.576	0.8903	High	5.93	6.06	0.084	2.402	0.8833	High	5.94	6.07	0.298	8.519	0.8624	High	5.94
B_CD + FGFR	1131	1154	VVDNGLNPVWPAKPFHFQISNPEF	12.65	2	18	12.67	12.82	0.474	3.761	0.9266	High	12.66	12.82	0.469	3.72	0.8566	High	12.67	12.82	0.451	3.579	0.9263	High	12.67	12.82	1.162	9.222	0.9144	High	12.67	12.82	1.065	8.449	0.8988	High	12.67	12.82	1.108	8.796	0.9121	High	12.67	12.82	1.814	14.396	0.9205	High	12.67
B_CD + FGFR	1131	1155	VVDNGLNPVWPAKPFHFQISNPEFA	12.47	3	19	12.27	12.4	0.537	4.037	0.8415	Medium	12.26	12.39	0.485	3.649	0.8219	Medium	12.27	12.4	0.475	3.569	0.8194	Medium	12.26	12.4	1.14	8.569	0.8179	Medium	12.27	12.4	1.161	8.726	0.8369	Medium	12.27	12.4	1.131	8.504	0.7967	Medium	12.26	12.4	1.903	14.31	0.8376	Medium	12.27
B_CD + FGFR	1131	1156	VVDNGLNPVWPAKPFHFQISNPEFAF	13.64	3	20	13.2	13.82	0.516	3.688	0.9274	High	13.2	13.82	0.506	3.611	0.9081	High	13.2	13.82	0.48	3.431	0.9141	High	13.2	13.82	1.17	8.356	0.9096	High	13.2	13.82	1.072	7.661	0.8779	Medium	13.2	13.82	1.155	8.247	0.8584	Medium	13.2	13.82	1.858	13.269	0.9159	High	13.2
B_CD + FGFR	1138	1147	PVWPAKPFHF	11.46	3	6	11.38	11.57	0.444	10.574	0.9102	High	11.38	11.56	0.458	10.912	0.9245	High	11.38	11.56	0.449	10.695	0.908	High	11.38	11.57	0.808	19.244	0.9101	High	11.38	11.56	0.821	19.558	0.9009	High	11.39	11.57	0.798	19.004	0.9153	High	11.38	11.57	1.219	29.029	0.912	High	11.39
B_CD + FGFR	1138	1154	PVWPAKPFHFQISNPEF	12.2	3	12	12.17	12.28	0.474	5.646	0.9377	High	12.17	12.28	0.513	6.111	0.945	High	12.18	12.28	0.463	5.516	0.9388	High	12.17	12.28	1.105	13.16	0.9441	High	12.18	12.28	1.108	13.192	0.9361	High	12.17	12.28	1.107	13.177	0.947	High	12.17	12.28	1.665	19.822	0.9497	High	12.17
B_CD + FGFR	1138	1156	PVWPAKPFHFQISNPEFAF	13.14	3	14	12.95	13.52	0.474	4.84	0.9492	High	12.95	13.53	0.505	5.149	0.9364	High	12.95	13.53	0.465	4.743	0.9438	High	12.94	13.52	1.118	11.41	0.9367	High	12.95	13.53	1.098	11.206	0.9322	High	12.95	13.53	1.082	11.036	0.9409	High	12.94	13.52	1.639	16.729	0.9456	High	12.95
B_CD + FGFR	1148	1154	QISNPEF	9.46	1	4	9.3	9.8	0.055	1.962	0.9083	High	9.31	9.79	0.044	1.571	0.9023	High	9.31	9.79	0.059	2.107	0.9087	High	9.31	9.79	0.082	2.936	0.9034	High	9.31	9.79	0.068	2.427	0.9066	High	9.3	9.8	0.1	3.583	0.8856	High	9.31	9.8	0.311	11.09	0.9102	High	9.31
B_CD + FGFR	1148	1155	QISNPEFA	8.93	1	5	8.77	8.88	0.041	1.16	0.8827	Medium	8.78	8.89	0.061	1.746	0.8692	Medium	8.78	8.89	0.052	1.481	0.8761	Medium	8.78	8.89	0.072	2.046	0.8767	Medium	8.78	8.89	0.076	2.167	0.8724	Medium	8.78	8.88	0.099	2.833	0.8466	Medium	8.78	8.89	0.326	9.327	0.8701	Medium	8.78
B_CD + FGFR	1148	1156	QISNPEFAF	12.3	1	6	12.16	12.67	0.048	1.134	0.909	High	12.16	12.66	0.049	1.171	0.9296	High	12.16	12.67	0.067	1.602	0.9209	High	12.16	12.67	0.071	1.7	0.9256	High	12.17	12.67	0.066	1.58	0.9238	High	12.17	12.67	0.075	1.789	0.9248	High	12.16	12.67	0.288	6.846	0.9273	High	12.17
B_CD + FGFR	1158	1166	RFVVYEEDM	10.23	2	7	10.18	10.34	0.236	4.823	0.8041	Medium	10.18	10.33	0.238	4.848	0.7979	Medium	10.18	10.33	0.249	5.084	0.8222	Medium	10.18	10.33	0.526	10.731	0.8304	Medium	10.18	10.33	0.563	11.496	0.8274	Medium	10.18	10.34	0.562	11.475	0.8256	Medium	10.18	10.33	0.647	13.201	0.8265	Medium	10.18
B_CD + FGFR	1160	1166	VVYEEDM	8.78	1	5	8.77	8.88	0.278	7.931	0.9178	High	8.77	8.89	0.29	8.298	0.9098	High	8.77	8.89	0.286	8.176	0.9045	High	8.77	8.89	0.623	17.786	0.8999	High	8.77	8.89	0.622	17.771	0.9136	High	8.77	8.88	0.651	18.614	0.8755	High	8.77	8.89	0.717	20.473	0.9172	High	8.77
B_CD + FGFR	1167	1172	FSDQNF	9.57	1	4	9.42	9.84	0.762	27.204	0.8987	Medium	9.42	9.83	0.775	27.668	0.8854	Medium	9.42	9.83	0.732	26.131	0.8998	Medium	9.42	9.84	1.344	48.007	0.8565	Medium	9.41	9.83	1.292	46.134	0.8646	Medium	9.41	9.84	1.285	45.877	0.8619	Medium	9.42	9.84	1.499	53.536	0.8873	Medium	9.41
B_CD + FGFR	1167	1199	FSDQNFLAQATFPVKGLKTGYRAVPLKNNYSED	10.72	5	29	10.56	10.68	0.827	4.073	0.847	Medium	10.56	10.67	0.804	3.958	0.8081	Medium	10.56	10.67	0.765	3.77	0.8146	Medium	10.56	10.68	1.513	7.456	0.847	Medium	10.56	10.67	1.516	7.47	0.8314	Medium	10.55	10.68	1.448	7.131	0.8287	Medium	10.56	10.68	2.39	11.775	0.8686	Medium	10.56
B_CD + FGFR	1173	1178	LAQATF	9.08	1	4	9.04	9.19	0.051	1.818	0.8444	Medium	9.05	9.19	0.039	1.381	0.8506	Medium	9.05	9.19	0.047	1.663	0.8476	Medium	9.05	9.19	0.06	2.14	0.8488	Medium	9.05	9.19	0.063	2.245	0.848	Medium	9.04	9.19	0.064	2.292	0.8404	Medium	9.05	9.19	0.254	9.075	0.8463	Medium	9.05
B_CD + FGFR	1173	1196	LAQATFPVKGLKTGYRAVPLKNNY	8.62	4	20	8.61	8.76	0.194	1.385	0.8649	Medium	8.61	8.76	0.161	1.152	0.8615	Medium	8.61	8.76	0.165	1.182	0.8706	Medium	8.61	8.76	0.684	4.883	0.881	Medium	8.61	8.76	0.605	4.319	0.8787	Medium	8.61	8.76	0.571	4.08	0.8535	Medium	8.61	8.76	1.206	8.612	0.873	Medium	8.61
B_CD + FGFR	1173	1199	LAQATFPVKGLKTGYRAVPLKNNYSED	8.55	5	23	8.36	9.06	0.138	0.856	0.9247	High	8.37	9.06	0.137	0.853	0.9221	High	8.37	9.06	0.148	0.918	0.9236	High	8.37	9.06	0.641	3.983	0.9242	High	8.37	9.06	0.633	3.934	0.9241	High	8.36	9.07	0.6	3.726	0.9259	High	8.37	9.06	1.284	7.977	0.9306	High	8.37
B_CD + FGFR	1174	1199	AQATFPVKGLKTGYRAVPLKNNYSED	8.18	4	22	8.14	8.24	0.22	1.426	0.8872	High	8.14	8.24	0.223	1.446	0.8819	High	8.14	8.24	0.228	1.481	0.8861	High	8.16	8.29	0.697	4.523	0.8203	Medium	8.14	8.24	0.687	4.459	0.8777	High	8.14	8.24	0.689	4.476	0.8512	Medium	8.14	8.24	1.373	8.916	0.8631	High	8.14
B_CD + FGFR	1176	1199	ATFPVKGLKTGYRAVPLKNNYSED	8.12	4	20	7.99	8.11	0.245	1.75	0.8858	High	8	8.11	0.216	1.539	0.9025	High	8	8.11	0.217	1.547	0.9211	High	8	8.11	0.682	4.873	0.9084	High	8	8.11	0.679	4.85	0.8942	Medium	8	8.11	0.629	4.493	0.8946	Medium	8	8.12	1.199	8.563	0.9009	High	8
B_CD + FGFR	1179	1187	PVKGLKTGY	6.03	2	7	6.05	6.21	0.13	2.66	0.8701	Medium	6.05	6.22	0.109	2.218	0.9046	Medium	6.05	6.22	0.106	2.173	0.9206	Medium	6.04	6.21	0.512	10.443	0.8632	Medium	6.05	6.22	0.494	10.084	0.8705	Medium	6.04	6.21	0.491	10.026	0.8846	Medium	6.05	6.22	1.125	22.964	0.8727	Medium	6.05
B_CD + FGFR	1179	1196	PVKGLKTGYRAVPLKNNY	6.81	4	15	6.74	6.81	0.007	0.064	0.7498	Medium	6.74	6.81	0.025	0.236	0.8188	Medium	6.74	6.81	0.111	1.055	0.8342	Medium	6.74	6.82	0.626	5.964	0.8859	Medium	6.74	6.81	0.666	6.34	0.8348	Medium	6.73	6.81	0.602	5.734	0.8314	Medium	6.74	6.82	1.075	10.236	0.8671	Medium	6.74
B_CD + FGFR	1188	1199	RAVPLKNNYSED	5.77	3	9	5.63	6.07	0.136	2.152	0.958	High	5.63	6.07	0.12	1.913	0.9525	High	5.63	6.07	0.135	2.137	0.9103	High	5.63	6.07	0.445	7.064	0.9519	High	5.63	6.07	0.46	7.304	0.9504	High	5.62	6.07	0.444	7.043	0.9437	High	5.63	6.08	0.687	10.897	0.9457	High	5.63
D_D1165H	26	33	CRSLEVGT	6.68	2	6	6.55	6.93	0.446	10.618	0.8372	Medium	6.55	6.93	0.46	10.962	0.8538	Medium	6.55	6.93	0.459	10.922	0.8556	Medium	6.56	6.93	1.04	24.76	0.8543	Medium	6.55	6.93	1.014	24.152	0.8456	Medium	6.56	6.93	1.059	25.215	0.8525	Medium	6.55	6.93	2.433	57.938	0.8264	Medium	6.74
D_D1165H	26	35	CRSLEVGTVM	9.41	2	8	9.3	9.35	0.377	6.724	0.9134	High	9.3	9.35	0.423	7.55	0.9131	High	9.3	9.35	0.449	8.013	0.903	High	9.3	9.35	1.306	23.329	0.9312	High	9.3	9.35	1.323	23.632	0.9256	High	9.3	9.35	1.33	23.748	0.9265	High	9.3	9.35	2.932	52.363	0.909	High	9.3
D_D1165H	33	37	TVMTL	10.28	1	3	10.21	10.24	0.08	3.8	0.8458	Medium	10.2	10.24	0.076	3.611	0.8687	Medium	10.2	10.24	0.077	3.674	0.8567	Medium	10.21	10.24	0.033	1.586	0.8777	Medium	10.2	10.24	0.028	1.347	0.8478	Medium	10.21	10.24	0.06	2.88	0.8139	Medium	10.2	10.24	0.029	1.387	0.8647	Medium	10.2
D_D1165H	37	54	LFYSKKSQRPERKTFQVK	6.62	5	15	6.54	6.99	0.73	6.954	0.9297	High	6.54	7	0.725	6.908	0.9291	High	6.54	7	0.772	7.355	0.9205	High	6.55	7	1.599	15.224	0.9305	High	6.55	7	1.613	15.358	0.9249	High	6.55	7	1.635	15.574	0.933	High	6.54	6.99	1.999	19.042	0.9379	High	6.74
D_D1165H	38	52	FYSKKSQRPERKTFQ	4.22	3	12	4.22	4.68	1.311	15.61	0.9612	High	4.23	4.68	1.315	15.653	0.9608	High	4.23	4.68	1.36	16.188	0.9615	High	4.23	4.68	2.09	24.886	0.955	High	4.23	4.68	2.085	24.821	0.9587	High	4.23	4.68	2.077	24.729	0.9486	High	4.22	4.68	2.499	29.747	0.9581	High	4.22
D_D1165H	38	55	FYSKKSQRPERKTFQVKL	6.68	4	15	6.52	7.03	0.715	6.814	0.9529	High	6.53	7.03	0.712	6.781	0.9548	High	6.53	7.03	0.744	7.084	0.9554	High	6.53	7.03	1.625	15.472	0.9408	High	6.53	7.03	1.607	15.303	0.9505	High	6.53	7.03	1.605	15.286	0.9471	High	6.52	7.03	1.993	18.98	0.9458	High	6.74
D_D1165H	53	57	VKLET	5.86	1	3	5.89	5.98	0.784	37.329	0.9202	Medium	5.89	5.98	0.779	37.083	0.9091	Medium	5.89	5.98	0.807	38.411	0.916	Medium	5.89	5.98	1.689	80.441	0.9416	Medium	5.89	5.98	1.729	82.35	0.9412	Medium	5.89	5.98	1.74	82.86	0.941	Medium	5.89	5.98	1.882	89.631	0.9365	Medium	5.89
D_D1165H	56	74	ETRQITWSRGADKIEGSID	8.66	4	17	8.61	9.04	2.139	17.973	0.8892	Medium	8.61	9.04	2.135	17.938	0.8949	Medium	8.61	9.04	2.249	18.898	0.8789	Medium	8.61	9.04	3.377	28.382	0.8926	Medium	8.61	9.04	3.402	28.591	0.8965	Medium	8.61	9.04	3.443	28.936	0.8981	Medium	8.61	9.04	4.868	40.907	0.8904	Medium	8.61
D_D1165H	58	74	RQITWSRGADKIEGSID	8.44	2	15	8.25	8.71	2.063	19.647	0.9214	High	8.25	8.71	2.025	19.289	0.9201	High	8.25	8.71	2.126	20.246	0.9163	High	8.25	8.71	3.273	31.168	0.9133	High	8.25	8.71	3.266	31.109	0.9108	High	8.25	8.71	3.297	31.404	0.9108	High	8.25	8.71	4.734	45.089	0.905	High	8.25
D_D1165H	75	89	IREIKEIRPGKTSRD	4.77	4	12	4.7	5.2	0.577	6.869	0.953	High	4.71	5.2	0.58	6.9	0.9508	High	4.71	5.2	0.591	7.04	0.953	High	4.71	5.2	1.428	17.006	0.9434	High	4.71	5.2	1.401	16.682	0.9522	High	4.71	5.2	1.425	16.963	0.9518	High	4.7	5.2	1.994	23.734	0.946	High	4.7
D_D1165H	75	107	IREIKEIRPGKTSRDFDRYQEDPAFRPDQSHCF	8.23	5	28	8.02	8.56	2.55	13.009	0.895	High	8.01	8.56	2.516	12.835	0.9128	High	8.01	8.56	2.622	13.377	0.9103	High	8.02	8.56	4.522	23.071	0.9043	High	8.01	8.56	4.603	23.482	0.9073	High	8.02	8.56	4.599	23.463	0.9091	High	8.01	8.56	5.602	28.583	0.9024	High	8.01
D_D1165H	78	89	IKEIRPGKTSRD	3.88	4	9	3.83	4.41	0.621	9.856	0.9635	High	3.83	4.41	0.644	10.225	0.9443	High	3.83	4.41	0.635	10.072	0.9595	High	3.83	4.41	1.563	24.813	0.9596	High	3.83	4.41	1.509	23.955	0.965	High	3.83	4.41	1.566	24.865	0.9605	High	3.83	4.41	2.159	34.262	0.9632	High	3.83
D_D1165H	78	90	IKEIRPGKTSRDF	5.82	4	10	5.64	6.08	0.525	7.493	0.9258	Medium	5.65	6.08	0.501	7.159	0.9412	Medium	5.65	6.08	0.52	7.425	0.9331	Medium	5.65	6.08	1.249	17.842	0.9092	Medium	5.65	6.08	1.238	17.689	0.9354	Medium	5.65	6.08	1.263	18.045	0.924	Medium	5.64	6.08	2.105	30.077	0.8806	Medium	5.81
D_D1165H	78	106	IKEIRPGKTSRDFDRYQEDPAFRPDQSHC	7.17	4	24	7.02	7.4	2.814	16.747	0.8404	Medium	7.02	7.4	2.755	16.398	0.8415	Medium	7.02	7.4	2.925	17.41	0.8559	Medium	7.03	7.4	5.048	30.045	0.8334	Medium	7.02	7.4	5.075	30.209	0.8376	Medium	7.03	7.4	5.1	30.357	0.844	Medium	7.02	7.4	6.182	36.795	0.8348	Medium	7.02
D_D1165H	90	106	FDRYQEDPAFRPDQSHC	7.75	3	13	7.67	8.16	2.57	28.247	0.9523	High	7.68	8.16	2.506	27.538	0.9565	High	7.68	8.16	2.631	28.914	0.9501	High	7.68	8.16	4.161	45.723	0.9532	High	7.68	8.16	4.196	46.105	0.9492	High	7.68	8.16	4.211	46.276	0.9502	High	7.68	8.15	4.518	49.647	0.9457	High	7.68
D_D1165H	94	107	QEDPAFRPDQSHCF	9.22	2	10	9.13	9.34	1.426	20.367	0.8334	Medium	9.12	9.33	1.38	19.712	0.8263	Medium	9.12	9.33	1.509	21.553	0.8373	Medium	9.13	9.34	2.293	32.752	0.8285	Medium	9.12	9.33	2.279	32.564	0.803	Medium	9.13	9.34	2.296	32.8	0.8065	Medium	9.12	9.33	2.573	36.764	0.8212	Medium	9.12
D_D1165H	97	106	PAFRPDQSHC	6.15	2	7	6.15	6.24	1.63	33.273	0.8924	High	6.16	6.24	1.553	31.689	0.8942	Medium	6.16	6.24	1.701	34.706	0.8623	Medium	6.16	6.24	2.161	44.103	0.905	High	6.16	6.24	2.196	44.821	0.8784	Medium	6.16	6.24	2.172	44.33	0.8859	Medium	6.16	6.24	2.467	50.356	0.9053	Medium	6.15
D_D1165H	111	115	YGMEF	12	1	3	11.84	11.9	0.136	6.469	0.9218	Medium	11.83	11.9	0.144	6.846	0.9221	Medium	11.83	11.9	0.141	6.732	0.9171	Medium	11.84	11.91	0.45	21.44	0.9007	Medium	11.83	11.9	0.435	20.715	0.9211	Medium	11.84	11.91	0.442	21.035	0.903	Medium	11.83	11.9	0.538	25.611	0.9405	Medium	11.84
D_D1165H	115	122	FRLKTLSL	10.23	2	6	10.22	10.56	0.025	0.606	0.9157	High	10.21	10.56	0.03	0.713	0.924	High	10.21	10.56	0.046	1.106	0.9155	High	10.22	10.56	0.093	2.226	0.9181	High	10.21	10.56	0.08	1.904	0.9292	High	10.22	10.56	0.096	2.297	0.9236	High	10.21	10.56	0.442	10.534	0.921	Medium	10.21
D_D1165H	116	122	RLKTLSL	8.5	2	5	8.35	8.76	0.053	1.516	0.9195	High	8.35	8.75	0.026	0.744	0.9515	High	8.35	8.75	0.03	0.854	0.9484	High	8.35	8.76	0.032	0.905	0.9444	High	8.35	8.75	0.025	0.702	0.9538	High	8.35	8.76	0.025	0.725	0.9351	High	8.35	8.75	0.065	1.861	0.9233	High	8.35
D_D1165H	123	128	QATSED	3.41	1	4	3.38	3.56	1.102	39.35	0.794	Medium	3.38	3.56	1.105	39.482	0.8749	Medium	3.38	3.56	1.147	40.962	0.8792	Medium	3.38	3.56	1.586	56.65	0.8696	Medium	3.38	3.56	1.608	57.43	0.863	Medium	3.38	3.56	1.607	57.396	0.8646	Medium	3.37	3.56	1.902	67.923	0.8385	Medium	3.37
D_D1165H	132	140	MWIKGLTWL	14.05	2	7	13.95	14.28	0.001	0.03	0.9443	High	13.95	14.28	0.002	0.033	0.9468	High	13.96	14.28	0.009	0.174	0.9358	High	13.96	14.28	0.006	0.116	0.9496	High	13.96	14.28	0	0.001	0.9183	High	13.95	14.28	0.001	0.022	0.9277	High	13.95	14.28	0.007	0.151	0.9589	High	13.95
D_D1165H	133	140	WIKGLTWL	13.86	1	6	13.74	14.07	0.009	0.226	0.9229	High	13.74	14.07	0.041	0.985	0.9156	High	13.75	14.07	0.013	0.321	0.9299	High	13.75	14.07	0.022	0.521	0.9236	High	13.75	14.07	0.007	0.177	0.928	High	13.74	14.07	0.02	0.465	0.9194	High	13.74	14.07	0.039	0.937	0.9193	High	13.74
D_D1165H	141	145	MEDTL	8.66	1	3	8.55	8.84	0.033	1.549	0.8764	Medium	8.55	8.84	0.032	1.545	0.8925	Medium	8.55	8.84	0.036	1.704	0.8892	Medium	8.55	8.84	0.038	1.805	0.8758	Medium	8.55	8.84	0.038	1.832	0.8835	Medium	8.55	8.84	0.046	2.196	0.8831	Medium	8.55	8.83	0.151	7.214	0.8755	Medium	8.55
D_D1165H	141	146	MEDTLQ	7.25	1	4	7.18	7.46	0.063	2.244	0.7606	Medium	7.18	7.47	0.12	4.298	0.7683	Medium	7.18	7.47	0.12	4.292	0.7613	Medium	7.19	7.47	0.086	3.061	0.8041	Medium	7.18	7.47	0.104	3.721	0.758	Medium	7.19	7.47	0.234	8.358	0.7227	Medium	7.18	7.47	0.482	17.213	0.802	Medium	7.18
D_D1165H	141	156	MEDTLQAATPLQIERW	12.52	3	13	12.39	12.53	0.107	1.173	0.9226	High	12.39	12.54	0.09	0.986	0.9303	High	12.39	12.53	0.082	0.9	0.9232	High	12.39	12.54	0.493	5.415	0.9318	High	12.39	12.53	0.511	5.612	0.9316	High	12.39	12.53	0.525	5.773	0.9324	High	12.39	12.53	1.294	14.222	0.9406	High	12.39
D_D1165H	141	161	MEDTLQAATPLQIERWLRKQF	13.19	4	18	13.04	13.69	0.059	0.471	0.9296	High	13.04	13.69	0.078	0.616	0.9351	High	13.03	13.7	0.069	0.544	0.9321	High	13.04	13.69	0.529	4.195	0.9248	High	13.03	13.7	0.533	4.227	0.9358	High	13.04	13.69	0.559	4.44	0.9304	High	13.03	13.69	1.427	11.323	0.9289	High	13.04
D_D1165H	141	162	MEDTLQAATPLQIERWLRKQFY	13.4	4	19	13.4	13.61	0.078	0.588	0.9448	High	13.41	13.62	0.095	0.712	0.9398	High	13.4	13.61	0.101	0.757	0.9389	High	13.41	13.62	0.554	4.163	0.9426	High	13.4	13.62	0.568	4.268	0.9364	High	13.41	13.62	0.564	4.241	0.9314	High	13.4	13.61	1.547	11.631	0.9425	High	13.41
D_D1165H	141	181	MEDTLQAATPLQIERWLRKQFYSVDRNREDRISAKDLKNML	12.24	5	38	12.24	12.57	1.131	4.252	0.9405	High	12.24	12.57	1.135	4.267	0.9442	High	12.24	12.56	1.197	4.499	0.9407	High	12.24	12.57	3.292	12.377	0.941	High	12.24	12.56	3.324	12.498	0.9417	High	12.24	12.57	3.394	12.758	0.9347	High	12.24	12.56	6.089	22.891	0.9398	High	12.24
D_D1165H	143	161	DTLQAATPLQIERWLRKQF	13.2	4	16	13	13.46	0.085	0.756	0.9074	High	13.01	13.47	0.106	0.947	0.925	High	13	13.46	0.096	0.854	0.9203	High	13.01	13.47	0.557	4.972	0.9288	High	13	13.46	0.573	5.118	0.9243	High	13.01	13.47	0.572	5.105	0.9054	High	13	13.46	1.45	12.949	0.9392	High	13
D_D1165H	146	161	QAATPLQIERWLRKQF	12.25	3	13	12.14	12.62	0.073	0.801	0.9225	High	12.13	12.62	0.073	0.801	0.9122	High	12.13	12.61	0.073	0.806	0.926	High	12.14	12.62	0.404	4.443	0.905	High	12.13	12.61	0.413	4.541	0.9128	High	12.14	12.62	0.422	4.643	0.9071	High	12.13	12.61	0.814	8.947	0.9174	High	12.14
D_D1165H	146	162	QAATPLQIERWLRKQFY	12.52	4	14	12.63	12.71	0.076	0.771	0.9572	High	12.64	12.71	0.075	0.762	0.963	High	12.63	12.71	0.068	0.69	0.9494	High	12.64	12.71	0.402	4.102	0.9445	High	12.63	12.71	0.394	4.017	0.9467	High	12.64	12.71	0.446	4.554	0.9432	High	12.63	12.71	0.934	9.533	0.9602	High	12.64
D_D1165H	162	181	YSVDRNREDRISAKDLKNML	9.03	3	18	8.88	9.38	1.282	10.175	0.9504	High	8.88	9.37	1.267	10.053	0.9515	High	8.88	9.37	1.33	10.559	0.9491	High	8.88	9.38	2.814	22.33	0.9398	High	8.88	9.37	2.825	22.417	0.9443	High	8.88	9.38	2.861	22.703	0.9413	High	8.88	9.37	4.197	33.307	0.9367	High	8.88
D_D1165H	162	184	YSVDRNREDRISAKDLKNMLSQV	10.24	4	21	10.2	10.28	1.139	7.75	0.9389	High	10.2	10.28	1.162	7.905	0.9263	High	10.2	10.28	1.205	8.197	0.9284	High	10.2	10.29	2.648	18.014	0.932	High	10.2	10.28	2.72	18.502	0.927	High	10.2	10.28	2.783	18.934	0.9215	High	10.19	10.28	4.67	31.769	0.9354	High	10.19
D_D1165H	182	193	SQVNYRVPNMRF	9.9	3	9	9.75	10.27	2.157	34.245	0.9071	High	9.75	10.26	2.12	33.653	0.9112	High	9.75	10.26	2.208	35.054	0.8951	High	9.76	10.27	3.129	49.667	0.8968	High	9.75	10.26	3.166	50.26	0.9067	High	9.76	10.27	3.215	51.024	0.9092	High	9.75	10.26	3.971	63.031	0.9081	High	9.75
D_D1165H	185	193	NYRVPNMRF	9.68	3	6	9.54	10.1	2.126	50.61	0.9325	Medium	9.53	10.09	2.075	49.394	0.9429	Medium	9.53	10.1	2.152	51.232	0.9406	Medium	9.54	10.1	3.02	71.906	0.9392	Medium	9.53	10.1	3.025	72.017	0.9323	Medium	9.54	10.1	3.029	72.116	0.9255	Medium	9.53	10.09	3.331	79.306	0.9336	Medium	9.53
D_D1165H	186	193	YRVPNMRF	9.68	3	5	9.52	9.98	2.079	59.391	0.9253	High	9.52	9.98	2.058	58.8	0.9278	High	9.52	9.98	2.123	60.67	0.9545	High	9.52	9.98	2.926	83.608	0.9522	High	9.52	9.98	2.919	83.4	0.9483	High	9.52	9.98	2.94	84.007	0.9499	High	9.51	9.98	3.072	87.768	0.954	High	9.51
D_D1165H	192	201	RFLRERLTDL	8.9	3	8	8.93	9.02	1.539	27.478	0.9445	Medium	8.93	9.01	1.534	27.393	0.9289	Medium	8.93	9.01	1.636	29.219	0.9156	Medium	8.93	9.02	3.525	62.954	0.9141	Medium	8.93	9.01	3.546	63.318	0.9273	Medium	8.93	9.02	3.531	63.058	0.9274	Medium	8.93	9.01	3.607	64.405	0.9252	Medium	8.93
D_D1165H	194	201	LRERLTDL	8.31	2	6	8.21	8.73	1.346	32.056	0.8221	Medium	8.21	8.73	1.351	32.169	0.8208	Medium	8.21	8.73	1.45	34.52	0.8222	Medium	8.21	8.73	2.828	67.323	0.8168	Medium	8.21	8.73	2.835	67.492	0.8124	Medium	8.21	8.73	2.837	67.539	0.8131	Medium	8.2	8.72	2.863	68.173	0.8151	Medium	8.2
D_D1165H	202	213	EQRSGDITYGQF	9.68	2	10	9.55	10.07	1.171	16.722	0.8912	High	9.54	10.07	1.14	16.279	0.898	High	9.54	10.07	1.174	16.772	0.8873	High	9.55	10.08	1.846	26.374	0.8849	High	9.54	10.07	1.85	26.429	0.8931	High	9.55	10.07	1.871	26.733	0.8918	High	9.54	10.07	3.002	42.886	0.8856	High	9.54
D_D1165H	217	221	YRSLM	8.39	1	3	8.36	8.66	0.033	1.553	0.8473	Medium	8.36	8.65	0.038	1.801	0.847	Medium	8.36	8.65	0.032	1.533	0.8396	Medium	8.36	8.66	0.025	1.187	0.8552	Medium	8.36	8.65	0.022	1.031	0.8561	Medium	8.36	8.66	0.053	2.509	0.8482	Medium	8.36	8.65	0.066	3.13	0.8582	Medium	8.36
D_D1165H	221	235	MYSAQKTMDLPFLET	12.73	2	12	12.79	12.87	1.449	17.248	0.8224	Medium	12.8	12.87	1.308	15.568	0.8276	Medium	12.79	12.87	1.44	17.142	0.8147	Medium	12.8	12.87	3.049	36.304	0.8059	Medium	12.79	12.86	2.959	35.23	0.8175	Medium	12.8	12.87	3.17	37.744	0.806	Medium	12.79	12.87	4.857	57.824	0.8424	Medium	12.79
D_D1165H	222	233	YSAQKTMDLPFL	13.14	2	9	12.88	13.5	0.652	10.348	0.9019	High	12.89	13.5	0.589	9.347	0.8959	High	12.88	13.49	0.662	10.501	0.936	High	12.89	13.5	1.828	29.019	0.9003	High	12.88	13.49	1.839	29.185	0.9154	High	12.89	13.5	1.862	29.562	0.9361	High	12.88	13.49	3.427	54.397	0.9214	High	12.89
D_D1165H	222	235	YSAQKTMDLPFLET	12.47	2	11	11.94	13.01	1.315	17.073	0.8965	High	11.93	13.01	1.296	16.834	0.8968	High	11.93	13.01	1.378	17.897	0.9001	High	11.94	13.01	2.95	38.306	0.9009	High	11.93	13.01	2.955	38.383	0.9048	High	11.94	13.01	2.985	38.766	0.9039	High	11.93	13.01	4.563	59.261	0.8945	High	11.94
D_D1165H	236	246	NTLRTGERPEL	7.21	3	8	7.04	7.56	3.362	60.04	0.9367	High	7.04	7.55	3.267	58.338	0.9415	High	7.04	7.55	3.408	60.852	0.942	High	7.04	7.56	4.362	77.884	0.9383	High	7.04	7.55	4.367	77.988	0.9339	High	7.04	7.55	4.365	77.943	0.9395	High	7.04	7.55	4.333	77.38	0.9342	High	7.04
D_D1165H	247	251	CQVSL	9.14	1	3	8.92	9.07	0.048	2.309	0.771	Medium	8.91	9.06	0.048	2.266	0.7696	Medium	8.91	9.06	0.073	3.455	0.7594	Medium	8.92	9.07	0.071	3.374	0.7837	Medium	8.91	9.06	0.102	4.87	0.7693	Medium	8.92	9.07	0.053	2.519	0.7684	Medium	8.91	9.06	0.132	6.262	0.7842	Medium	8.91
D_D1165H	247	253	CQVSLSE	7.8	1	5	7.62	7.9	0.326	9.304	0.8581	Medium	7.62	7.9	0.223	6.366	0.9029	High	7.62	7.9	0.305	8.711	0.8562	Medium	7.62	7.9	0.679	19.393	0.9119	High	7.62	7.9	0.67	19.153	0.8967	High	7.62	7.9	0.675	19.283	0.8979	High	7.62	7.89	1.041	29.729	0.904	High	7.62
D_D1165H	249	254	VSLSEF	11.41	1	4	11.25	11.53	0.166	5.924	0.9046	Medium	11.24	11.53	0.176	6.269	0.9137	Medium	11.25	11.53	0.2	7.146	0.9144	Medium	11.25	11.54	0.563	20.099	0.9081	Medium	11.25	11.53	0.54	19.296	0.9083	Medium	11.25	11.54	0.541	19.327	0.9085	Medium	11.24	11.53	0.831	29.678	0.9089	Medium	11.25
D_D1165H	254	258	FQQFL	11.89	1	3	11.76	12.05	0.026	1.257	0.8521	Medium	11.76	12.05	0.037	1.763	0.858	Medium	11.76	12.05	0.038	1.787	0.8737	Medium	11.76	12.06	0.024	1.143	0.8768	Medium	11.76	12.05	0.009	0.412	0.8785	Medium	11.76	12.06	0.029	1.405	0.8691	Medium	11.76	12.05	0.049	2.326	0.8747	Medium	11.76
D_D1165H	259	265	LEYQGEL	9.84	1	5	9.7	10.09	0.152	4.35	0.9204	High	9.7	10.09	0.145	4.146	0.9274	High	9.7	10.09	0.16	4.559	0.929	High	9.71	10.09	0.66	18.871	0.9251	High	9.7	10.09	0.656	18.752	0.9271	High	9.7	10.09	0.669	19.101	0.9289	High	9.7	10.09	1.152	32.912	0.9239	High	9.7
D_D1165H	266	271	WAVDRL	10.39	1	4	10.23	10.55	0.604	21.586	0.9022	Medium	10.23	10.55	0.578	20.629	0.913	Medium	10.23	10.55	0.601	21.47	0.9144	Medium	10.23	10.55	1.109	39.592	0.8767	Medium	10.23	10.55	1.126	40.205	0.8763	Medium	10.23	10.55	1.113	39.762	0.8763	Medium	10.23	10.55	1.27	45.366	0.8702	Medium	10.23
D_D1165H	276	280	FMLSF	14.12	1	3	13.94	14.31	0.028	1.334	0.8842	High	13.95	14.32	0.023	1.076	0.8857	High	13.95	14.32	0.017	0.818	0.8907	High	13.95	14.32	0.029	1.36	0.8869	High	13.95	14.32	0.013	0.612	0.8915	High	13.95	14.31	0.031	1.486	0.8955	High	13.94	14.31	0.067	3.183	0.8897	High	13.94
D_D1165H	281	287	LRDPLRE	7.17	1	4	6.94	7.26	0.07	2.489	0.9302	High	6.95	7.27	0.06	2.13	0.9396	High	6.95	7.27	0.059	2.096	0.9475	High	6.95	7.27	0.425	15.181	0.9282	Medium	6.95	7.27	0.427	15.254	0.924	Medium	6.95	7.27	0.423	15.118	0.9368	Medium	6.94	7.26	1.29	46.056	0.9286	Medium	6.95
D_D1165H	281	293	LRDPLREIEEPYF	11.83	3	9	11.66	12.25	0.508	8.065	0.9507	High	11.66	12.25	0.521	8.263	0.9454	High	11.66	12.24	0.529	8.4	0.9469	High	11.66	12.25	1.592	25.264	0.9517	High	11.66	12.24	1.609	25.533	0.9532	High	11.66	12.25	1.603	25.437	0.9572	High	11.66	12.24	2.565	40.714	0.9426	High	11.66
D_D1165H	288	293	IEEPYF	11.78	1	3	11.79	11.87	0.185	8.82	0.8865	Medium	11.79	11.86	0.185	8.817	0.8912	Medium	11.79	11.87	0.195	9.279	0.902	Medium	11.8	11.87	0.367	17.475	0.8856	Medium	11.79	11.87	0.351	16.716	0.8928	Medium	11.8	11.87	0.429	20.435	0.8793	Medium	11.79	11.87	0.349	16.598	0.8861	Medium	11.8
D_D1165H	294	298	FLDEL	11.89	1	3	11.72	12.02	0.023	1.101	0.8736	High	11.71	12.02	0.026	1.261	0.8869	High	11.72	12.02	0.033	1.557	0.878	High	11.72	12.02	0.045	2.162	0.8868	High	11.72	12.02	0.052	2.466	0.89	High	11.72	12.02	0.061	2.922	0.8711	High	11.71	12.02	0.13	6.201	0.8874	High	11.72
D_D1165H	298	302	LVTFL	13.19	1	3	12.97	13.47	0.017	0.801	0.9075	High	12.97	13.48	0.023	1.111	0.9106	High	12.97	13.47	0.043	2.026	0.8026	Medium	12.97	13.48	0.017	0.786	0.9105	High	12.97	13.47	0.011	0.513	0.9181	High	12.97	13.48	0.016	0.782	0.9202	High	12.97	13.47	0.006	0.295	0.9024	High	12.97
D_D1165H	303	310	FSKENSVW	9.79	2	6	9.66	9.86	0.101	2.407	0.849	Medium	9.66	9.86	0.041	0.972	0.919	High	9.66	9.86	0.056	1.334	0.9178	High	9.66	9.87	0.067	1.587	0.9106	High	9.66	9.86	0.063	1.501	0.9239	High	9.66	9.86	0.068	1.614	0.912	High	9.66	9.86	0.128	3.052	0.9023	High	9.66
D_D1165H	303	314	FSKENSVWNSQL	10.56	2	10	10.33	10.82	0.11	1.566	0.8537	High	10.33	10.82	0.121	1.725	0.8538	High	10.33	10.82	0.123	1.763	0.8557	High	10.34	10.82	0.825	11.782	0.8431	High	10.33	10.82	0.773	11.042	0.8272	Medium	10.33	10.82	0.821	11.731	0.8609	High	10.33	10.82	2.038	29.113	0.8314	Medium	10.33
D_D1165H	315	329	DAVCPETMNNPLSHY	10.56	2	11	10.07	11.05	0.686	8.904	0.7708	Medium	10.06	11.04	0.725	9.421	0.7621	Medium	10.06	11.04	0.724	9.406	0.7669	Medium	10.07	11.05	1.69	21.942	0.7206	Medium	10.06	11.04	1.707	22.174	0.7209	Medium	10.07	11.05	1.698	22.05	0.7215	Medium	10.06	11.04	2.623	34.069	0.6999	Medium	10.06
D_D1165H	319	329	PETMNNPLSHY	9.73	2	8	9.26	9.96	0.065	1.158	0.9071	High	9.26	9.96	0.071	1.267	0.9131	High	9.26	9.96	0.104	1.866	0.8997	Medium	9.26	9.97	0.233	4.157	0.9143	High	9.26	9.96	0.227	4.052	0.9153	High	9.26	9.97	0.247	4.417	0.9182	High	9.25	9.96	0.899	16.058	0.9245	High	9.25
D_D1165H	330	337	WISSSANT	7.66	1	6	7.54	8.04	0.066	1.581	0.9004	High	7.53	8.04	0.067	1.603	0.9122	High	7.54	8.04	0.081	1.918	0.9121	High	7.54	8.04	0.084	2.002	0.9085	High	7.54	8.04	0.087	2.075	0.9144	High	7.54	8.04	0.083	1.979	0.9161	High	7.53	8.04	0.242	5.751	0.8819	High	7.53
D_D1165H	330	339	WISSSANTYL	11.57	1	8	11.61	11.85	0.161	2.879	0.9102	Medium	11.6	11.85	0.163	2.906	0.9089	Medium	11.61	11.85	0.242	4.327	0.8629	Medium	11.61	11.86	0.155	2.759	0.876	Medium	11.61	11.85	0.169	3.013	0.859	Medium	11.61	11.85	0.237	4.23	0.8499	Medium	11.61	11.85	0.365	6.517	0.8797	Medium	11.61
D_D1165H	344	350	FSSESSL	8.36	1	5	8.34	8.45	0.473	13.502	0.8924	Medium	8.34	8.45	0.444	12.689	0.8703	Medium	8.34	8.45	0.514	14.698	0.8919	Medium	8.34	8.45	1.541	44.02	0.8699	Medium	8.34	8.45	1.598	45.647	0.8625	Medium	8.34	8.45	1.586	45.323	0.8604	Medium	8.34	8.45	2.256	64.459	0.8979	Medium	8.34
D_D1165H	345	350	SSESSL	6.35	1	4	6.26	6.35	0.34	12.149	0.8986	High	6.27	6.35	0.362	12.944	0.8981	High	6.27	6.35	0.383	13.683	0.8903	High	6.27	6.35	1.336	47.718	0.8972	High	6.27	6.35	1.324	47.268	0.8841	High	6.27	6.35	1.371	48.965	0.8925	High	6.26	6.35	2.074	74.088	0.9071	High	6.23
D_D1165H	345	352	SSESSLEA	6.53	1	6	6.59	6.69	0.521	12.401	0.8668	Medium	6.59	6.7	0.525	12.494	0.8589	Medium	6.6	6.7	0.584	13.9	0.8733	Medium	6.6	6.7	1.849	44.032	0.8224	Medium	6.6	6.7	1.862	44.333	0.8288	Medium	6.6	6.7	1.897	45.174	0.8335	Medium	6.59	6.69	2.557	60.881	0.8471	Medium
D_D1165H	357	363	LRMGCRC	6.3	2	5	6.11	6.43	0.029	0.814	0.9222	Medium	6.12	6.44	0.037	1.05	0.9236	Medium	6.12	6.44	0.035	0.989	0.9274	Medium	6.12	6.44	0.042	1.206	0.9284	Medium	6.12	6.44	0.028	0.788	0.9253	Medium	6.12	6.44	0.045	1.291	0.9261	Medium	6.11	6.43	0.071	2.031	0.9128	Medium	6.11
D_D1165H	367	375	DCWDGPDGM	11.64	1	6	11.52	11.69	0.5	11.904	0.8841	Medium	11.51	11.69	0.443	10.557	0.8777	Medium	11.51	11.69	0.46	10.956	0.8723	Medium	11.52	11.7	0.654	15.562	0.8193	Medium	11.51	11.69	0.624	14.865	0.8788	Medium	11.52	11.7	0.669	15.938	0.8405	Medium	11.51	11.69	1.032	24.57	0.8826	Medium	11.52
D_D1165H	367	386	DCWDGPDGMPVIYHGHTLTT	10.88	3	16	10.69	11.43	1.069	9.548	0.9105	High	10.69	11.43	1.094	9.771	0.9206	High	10.69	11.43	1.137	10.154	0.9152	High	10.7	11.44	2.418	21.585	0.9185	High	10.69	11.43	2.443	21.809	0.9232	High	10.7	11.43	2.461	21.973	0.9231	High	10.69	11.43	2.89	25.802	0.9135	High	10.69
D_D1165H	367	394	DCWDGPDGMPVIYHGHTLTTKIKFSDVL	11.61	4	24	11.6	11.69	1.183	7.043	0.9274	High	11.6	11.69	1.192	7.097	0.9245	High	11.6	11.69	1.251	7.447	0.9341	High	11.6	11.7	2.772	16.502	0.9293	High	11.6	11.69	2.814	16.751	0.9277	High	11.6	11.7	2.856	16.998	0.9322	High	11.6	11.69	3.958	23.56	0.936	High	11.6
D_D1165H	367	396	DCWDGPDGMPVIYHGHTLTTKIKFSDVLHT	10.9	5	26	10.82	11.17	1.136	6.243	0.8887	Medium	10.82	11.17	1.133	6.223	0.9079	High	10.82	11.17	1.175	6.457	0.9201	High	10.82	11.18	2.582	14.186	0.8794	Medium	10.82	11.17	2.599	14.278	0.8942	High	10.82	11.17	2.656	14.596	0.8987	High	10.82	11.17	3.748	20.595	0.8899	Medium	10.81
D_D1165H	376	386	PVIYHGHTLTT	7.16	3	9	7.2	7.35	0.834	13.236	0.8944	Medium	7.21	7.36	0.849	13.479	0.8942	Medium	7.21	7.36	0.849	13.473	0.903	High	7.21	7.36	2.098	33.297	0.8855	High	7.21	7.36	2.113	33.547	0.8819	Medium	7.21	7.36	2.124	33.715	0.8882	Medium	7.2	7.36	2.144	34.034	0.8927	High	7.21
D_D1165H	387	394	KIKFSDVL	9.87	1	6	9.76	10.07	0.339	8.061	0.9184	High	9.76	10.07	0.367	8.729	0.9196	High	9.76	10.07	0.35	8.341	0.9258	High	9.76	10.08	0.699	16.643	0.909	High	9.76	10.07	0.69	16.423	0.9221	High	9.76	10.07	0.7	16.662	0.9253	High	9.76	10.07	1.145	27.273	0.9151	High	9.76
D_D1165H	387	399	KIKFSDVLHTIKE	9.3	3	11	9.2	9.3	0.259	3.358	0.9557	High	9.2	9.3	0.256	3.324	0.9596	High	9.2	9.3	0.27	3.509	0.9482	High	9.2	9.3	0.496	6.445	0.9609	High	9.2	9.3	0.476	6.182	0.96	High	9.2	9.3	0.493	6.397	0.9611	High	9.2	9.3	0.89	11.552	0.9596	High	9.2
D_D1165H	391	399	SDVLHTIKE	7.38	3	7	7.24	7.33	0.162	3.307	0.8118	Medium	7.24	7.33	0.051	1.037	0.9241	High	7.24	7.33	0.092	1.882	0.9007	High	7.24	7.34	0.066	1.343	0.9338	High	7.24	7.33	0.075	1.54	0.9226	High	7.24	7.34	0.054	1.102	0.92	High	7.24	7.33	0.135	2.761	0.9075	High	7.24
D_D1165H	391	401	SDVLHTIKEHA	7.91	3	9	7.86	8.25	0.063	0.997	0.8996	Medium	7.85	8.25	0.066	1.041	0.9004	Medium	7.85	8.25	0.07	1.119	0.8769	Medium	7.86	8.25	0.072	1.139	0.8784	Medium	7.85	8.25	0.065	1.031	0.8787	Medium	7.86	8.25	0.07	1.112	0.8947	Medium	7.85	8.25	0.13	2.068	0.907	Medium	7.85
D_D1165H	400	407	HAFVASEY	8.18	1	6	8.04	8.4	0.162	3.858	0.8969	Medium	8.04	8.4	0.166	3.953	0.8885	Medium	8.04	8.4	0.156	3.72	0.9023	Medium	8.04	8.4	0.743	17.69	0.8889	Medium	8.04	8.4	0.738	17.574	0.8682	Medium	8.04	8.4	0.753	17.923	0.8748	Medium	8.04	8.4	1.674	39.846	0.8754	Medium	8.04
D_D1165H	400	411	HAFVASEYPVIL	11.91	2	9	11.74	12.13	0.097	1.535	0.9238	Medium	11.74	12.13	0.103	1.64	0.9035	Medium	11.74	12.13	0.133	2.111	0.8747	Medium	11.75	12.13	0.579	9.193	0.9348	Medium	11.74	12.13	0.547	8.687	0.9187	Medium	11.75	12.13	0.543	8.622	0.9149	Medium	11.74	12.13	1.321	20.975	0.9134	Medium	11.75
D_D1165H	402	406	FVASE	6.03	1	3	5.96	6.26	0.213	10.125	0.8279	Medium	5.96	6.27	0.201	9.574	0.8236	Medium	5.97	6.27	0.226	10.774	0.8194	Medium	5.97	6.27	0.766	36.484	0.838	Medium	5.97	6.27	0.746	35.508	0.8337	Medium	5.97	6.27	0.795	37.878	0.8275	Medium	5.96	6.26	1.489	70.885	0.8486	Medium	5.96
D_D1165H	407	411	YPVIL	12.15	1	3	11.78	12.3	0.006	0.301	0.8945	Medium	11.77	12.3	0.009	0.405	0.9038	Medium	11.77	12.29	0.01	0.5	0.9017	Medium	11.78	12.3	0.015	0.729	0.8994	Medium	11.77	12.29	0.02	0.937	0.9001	Medium	11.78	12.3	0.041	1.974	0.7968	Medium	11.77	12.29	0.023	1.106	0.8453	Medium	11.78
D_D1165H	412	437	SIEDHCSIAQQRNMAQHFRKVLGDTL	10.39	4	24	10.33	10.85	1.275	7.589	0.9119	High	10.32	10.84	1.278	7.608	0.9165	High	10.32	10.84	1.317	7.837	0.917	High	10.33	10.85	1.889	11.243	0.9083	High	10.32	10.84	1.906	11.345	0.9181	High	10.33	10.85	1.918	11.418	0.916	High	10.32	10.84	3.222	19.182	0.9081	High	10.32
D_D1165H	428	437	HFRKVLGDTL	7.8	3	8	7.89	7.96	0.185	3.301	0.9275	Medium	7.89	7.95	0.196	3.497	0.9364	Medium	7.89	7.95	0.19	3.39	0.9341	Medium	7.89	7.96	0.581	10.373	0.9269	Medium	7.89	7.96	0.542	9.682	0.9287	Medium	7.89	7.96	0.562	10.043	0.9179	Medium	7.89	7.95	1.201	21.453	0.9115	Medium	7.89
D_D1165H	438	443	LTKPVD	4.58	1	3	4.6	4.86	0.575	27.381	0.8946	Medium	4.6	4.86	0.564	26.842	0.89	Medium	4.6	4.86	0.583	27.741	0.8933	Medium	4.61	4.87	1.109	52.812	0.9069	Medium	4.61	4.87	1.106	52.685	0.891	Medium	4.61	4.87	1.141	54.328	0.8928	Medium	4.6	4.86	1.656	78.879	0.9099	Medium	4.6
D_D1165H	438	446	LTKPVDIAA	7.34	1	6	7.27	7.67	1.962	46.71	0.9215	High	7.27	7.66	1.892	45.043	0.9038	Medium	7.28	7.66	1.951	46.461	0.9196	High	7.28	7.66	2.491	59.32	0.9172	Medium	7.28	7.66	2.493	59.353	0.9138	Medium	7.28	7.66	2.499	59.511	0.9185	Medium	7.27	7.66	2.998	71.389	0.9167	Medium	7.27
D_D1165H	438	455	LTKPVDIAADGLPSPNQL	10.67	3	13	10.49	10.69	2.192	24.092	0.9213	Medium	10.49	10.69	2.112	23.206	0.9197	Medium	10.49	10.69	2.209	24.28	0.9209	Medium	10.49	10.7	2.799	30.753	0.8989	Medium	10.49	10.69	2.785	30.606	0.9444	Medium	10.49	10.7	2.833	31.127	0.9142	Medium	10.49	10.69	3.701	40.668	0.9275	Medium	10.49
D_D1165H	438	471	LTKPVDIAADGLPSPNQLKRKILIKHKKLAEGSA	8.17	5	29	7.82	8.65	3.766	18.549	0.954	High	7.81	8.64	3.625	17.856	0.9559	High	7.81	8.64	3.814	18.787	0.9544	High	7.82	8.65	4.698	23.142	0.9534	High	7.81	8.64	4.695	23.127	0.9505	High	7.82	8.65	4.753	23.411	0.9468	High	7.81	8.64	5.822	28.681	0.952	High	7.81
D_D1165H	438	472	LTKPVDIAADGLPSPNQLKRKILIKHKKLAEGSAY	8.72	5	30	8.54	8.6	4.157	19.795	0.9339	High	8.53	8.6	3.986	18.981	0.9445	High	8.53	8.6	4.235	20.167	0.9416	High	8.54	8.61	5.101	24.293	0.9394	High	8.53	8.6	5.09	24.239	0.9258	High	8.54	8.6	5.168	24.608	0.9319	High	8.53	8.6	6.198	29.512	0.9409	High	8.53
D_D1165H	444	455	IAADGLPSPNQL	10.42	1	8	10.61	10.77	0.813	14.51	0.8562	Medium	10.61	10.77	0.766	13.679	0.8581	Medium	10.61	10.77	0.837	14.95	0.8346	Medium	10.61	10.77	0.991	17.697	0.8698	Medium	10.61	10.77	1.029	18.367	0.8271	Medium	10.61	10.77	0.999	17.832	0.8714	Medium	10.61	10.77	1.405	25.083	0.8535	Medium	10.61
D_D1165H	447	455	DGLPSPNQL	10.11	1	5	9.93	10.41	0.06	1.726	0.8913	High	9.93	10.4	0.058	1.66	0.8976	High	9.93	10.41	0.048	1.378	0.8857	High	9.93	10.41	0.068	1.945	0.8865	High	9.93	10.41	0.053	1.513	0.8924	High	9.93	10.41	0.082	2.342	0.8773	High	9.93	10.4	0.151	4.327	0.8857	High	9.93
D_D1165H	447	471	DGLPSPNQLKRKILIKHKKLAEGSA	7.22	4	21	7.24	7.72	1.964	13.358	0.9323	High	7.24	7.71	1.89	12.858	0.9337	High	7.24	7.71	1.982	13.485	0.9312	Medium	7.24	7.71	2.36	16.056	0.9395	High	7.24	7.71	2.357	16.037	0.9402	High	7.24	7.71	2.379	16.186	0.9383	High	7.24	7.71	2.609	17.749	0.9498	High	7.24
D_D1165H	456	471	KRKILIKHKKLAEGSA	3.66	4	14	3.65	4.14	2.317	23.639	0.9585	High	3.66	4.14	2.219	22.646	0.9615	High	3.65	4.14	2.328	23.751	0.9623	High	3.66	4.14	2.716	27.71	0.9619	High	3.66	4.14	2.706	27.617	0.9608	High	3.66	4.14	2.723	27.783	0.9646	High	3.65	4.14	2.914	29.733	0.9582	High	3.65
D_D1165H	456	472	KRKILIKHKKLAEGSAY	4.25	4	15	4.34	4.42	2.703	25.74	0.9609	High	4.34	4.42	2.598	24.739	0.9562	High	4.34	4.42	2.719	25.891	0.959	High	4.35	4.42	3.123	29.745	0.9591	High	4.34	4.42	3.144	29.944	0.9634	High	4.35	4.42	3.14	29.906	0.9601	High	4.34	4.42	3.323	31.652	0.9668	High	4.27
D_D1165H	472	480	YEEVPTSVM	9.79	1	6	9.65	10.44	3.113	74.122	0.8672	High	9.64	10.43	3.011	71.682	0.9115	High	9.64	10.43	3.134	74.612	0.9367	High	9.65	10.44	3.463	82.462	0.9285	High	9.64	10.43	3.475	82.743	0.9232	High	9.65	10.44	3.498	83.292	0.9329	High	9.64	10.43	3.457	82.312	0.929	High	9.64
D_D1165H	473	480	EEVPTSVM	9.08	1	5	8.86	9.44	2.841	81.173	0.8932	Medium	8.85	9.44	2.738	78.218	0.8857	Medium	8.85	9.44	2.835	81.01	0.911	Medium	8.86	9.45	3.117	89.055	0.9121	Medium	8.85	9.44	3.125	89.274	0.898	Medium	8.86	9.44	3.134	89.533	0.9011	Medium	8.85	9.44	3.145	89.854	0.903	Medium	8.85
D_D1165H	481	488	YSENDISN	6.21	1	6	6.1	6.39	2.531	60.267	0.8623	Medium	6.11	6.39	2.373	56.511	0.8578	High	6.11	6.39	2.525	60.13	0.8628	High	6.11	6.4	3.066	73.001	0.8642	Medium	6.11	6.39	3.1	73.803	0.8409	Medium	6.11	6.4	3.064	72.946	0.8761	Medium	6.1	6.39	3.004	71.526	0.8508	Medium	6.1
D_D1165H	481	495	YSENDISNSIKNGIL	11.41	2	13	11.27	11.77	1.955	21.482	0.8973	High	11.26	11.76	1.9	20.877	0.9071	High	11.26	11.77	2.015	22.14	0.894	High	11.27	11.77	3.264	35.871	0.9028	High	11.26	11.77	3.282	36.065	0.8998	High	11.27	11.77	3.296	36.215	0.911	High	11.26	11.77	3.898	42.833	0.8973	High	11.27
D_D1165H	481	496	YSENDISNSIKNGILY	11.53	2	14	11.46	11.58	1.95	19.901	0.8636	Medium	11.45	11.58	1.932	19.714	0.8976	Medium	11.46	11.58	1.999	20.403	0.8572	Medium	11.46	11.59	3.265	33.317	0.9002	Medium	11.46	11.58	3.341	34.091	0.8859	Medium	11.46	11.59	3.375	34.44	0.8939	Medium	11.45	11.58	3.965	40.461	0.9038	Medium	11.46
D_D1165H	481	509	YSENDISNSIKNGILYLEDPVNHEWYPHY	13.81	4	25	13.74	13.84	1.682	9.611	0.944	High	13.74	13.85	1.621	9.262	0.935	High	13.75	13.85	1.729	9.878	0.9438	High	13.75	13.85	2.971	16.977	0.9324	High	13.75	13.85	2.937	16.782	0.9402	High	13.74	13.84	2.972	16.985	0.9277	High	13.74	13.84	3.88	22.17	0.943	High	13.74
D_D1165H	489	495	SIKNGIL	8.77	2	5	8.61	8.96	0.06	1.709	0.9523	High	8.61	8.95	0.072	2.048	0.9637	High	8.61	8.95	0.104	2.985	0.9156	High	8.61	8.96	0.321	9.178	0.925	High	8.61	8.95	0.318	9.073	0.9336	High	8.61	8.96	0.322	9.206	0.9559	High	8.61	8.95	0.634	18.124	0.9517	High	8.61
D_D1165H	496	509	YLEDPVNHEWYPHY	10.77	2	10	10.49	11.27	0.043	0.61	0.9174	Medium	10.48	11.27	0.037	0.525	0.9278	Medium	10.48	11.27	0.044	0.622	0.9212	Medium	10.49	11.28	0.068	0.967	0.9243	Medium	10.48	11.27	0.067	0.959	0.9248	Medium	10.49	11.28	0.075	1.077	0.9269	Medium	10.48	11.27	0.265	3.793	0.9136	Medium	10.48
D_D1165H	497	509	LEDPVNHEWYPHY	10.4	3	9	10.45	10.5	0.126	2.007	0.897	High	10.45	10.5	0.101	1.607	0.902	High	10.45	10.5	0.119	1.889	0.8994	High	10.45	10.5	0.163	2.579	0.8989	High	10.45	10.5	0.131	2.082	0.9023	High	10.45	10.5	0.189	3.001	0.8802	High	10.45	10.5	0.42	6.662	0.8583	Medium	10.45
D_D1165H	510	519	FVLTSSKIYY	10.93	2	8	10.8	11.18	0.298	5.322	0.7805	Medium	10.79	11.18	0.273	4.872	0.8169	Medium	10.79	11.18	0.334	5.97	0.7767	Medium	10.8	11.18	0.86	15.35	0.7921	Medium	10.79	11.18	0.863	15.411	0.7802	Medium	10.8	11.18	0.883	15.774	0.7905	Medium	10.79	11.18	1.071	19.123	0.7895	Medium	10.79
D_D1165H	510	522	FVLTSSKIYYSEE	10.17	2	11	10.07	10.42	0.672	8.728	0.9033	High	10.07	10.41	0.661	8.585	0.906	High	10.07	10.41	0.715	9.287	0.8977	High	10.08	10.42	1.659	21.542	0.9087	High	10.07	10.41	1.665	21.627	0.9148	High	10.07	10.42	1.709	22.198	0.9151	High	10.07	10.41	2.023	26.269	0.9023	High	10.07
D_D1165H	523	530	TSSDQGNE	3.19	1	6	3.32	3.5	2.309	54.98	0.835	Medium	3.33	3.5	2.249	53.558	0.9004	Medium	3.33	3.5	2.292	54.566	0.8918	Medium	3.33	3.51	2.315	55.126	0.8954	Medium	3.33	3.5	2.371	56.461	0.8802	Medium	3.33	3.51	2.372	56.466	0.8731	Medium	3.32	3.5	2.305	54.881	0.8951	Medium	3.32
D_D1165H	523	531	TSSDQGNED	3.46	1	7	3.45	3.58	2.634	53.764	0.839	Medium	3.45	3.58	2.555	52.147	0.8504	Medium	3.45	3.58	2.643	53.948	0.8623	Medium	3.46	3.58	2.676	54.607	0.8402	Medium	3.45	3.58	2.644	53.968	0.8463	Medium	3.46	3.58	2.728	55.681	0.8326	Medium	3.45	3.58	2.692	54.949	0.8756	Medium	3.45
D_D1165H	545	566	HSSEKWFHGKLGAGRDGRHIAE	6.25	5	20	6.13	6.26	2.512	17.945	0.9038	High	6.13	6.26	2.44	17.43	0.9109	High	6.13	6.26	2.552	18.228	0.894	High	6.14	6.26	3.957	28.265	0.935	High	6.13	6.26	3.991	28.51	0.9259	High	6.14	6.26	3.996	28.54	0.933	High	6.13	6.26	4.872	34.797	0.9295	High	6.13
D_D1165H	545	568	HSSEKWFHGKLGAGRDGRHIAERL	6.89	5	22	6.79	7.3	1.949	12.655	0.8909	High	6.8	7.31	1.881	12.213	0.898	High	6.8	7.31	1.978	12.846	0.894	High	6.8	7.31	3.551	23.058	0.8969	High	6.8	7.31	3.537	22.968	0.8995	High	6.8	7.31	3.632	23.586	0.892	High	6.79	7.31	4.891	31.757	0.8948	High	6.79
D_D1165H	572	583	YCIETGAPDGSF	10.72	1	9	10.58	11.26	0.355	5.636	0.9153	High	10.57	11.25	0.372	5.91	0.9224	High	10.57	11.25	0.39	6.188	0.9328	High	10.58	11.26	1.306	20.734	0.9126	High	10.57	11.25	1.32	20.952	0.9222	High	10.58	11.26	1.327	21.067	0.9223	High	10.57	11.25	2.292	36.378	0.9244	High	10.57
D_D1165H	573	583	CIETGAPDGSF	9.62	1	8	9.41	9.94	0.429	7.665	0.8483	Medium	9.41	9.94	0.409	7.312	0.8615	Medium	9.41	9.94	0.434	7.756	0.8499	Medium	9.41	9.94	1.41	25.178	0.8629	Medium	9.41	9.94	1.398	24.965	0.849	Medium	9.41	9.94	1.413	25.238	0.8567	Medium	9.41	9.93	2.256	40.279	0.8651	Medium	9.41
D_D1165H	573	584	CIETGAPDGSFL	11.73	1	9	11.55	11.94	0.378	6.003	0.8536	Medium	11.55	11.93	0.368	5.843	0.8503	Medium	11.55	11.93	0.363	5.768	0.8493	Medium	11.55	11.94	1.195	18.967	0.8329	Medium	11.55	11.93	1.204	19.117	0.8425	Medium	11.55	11.94	1.233	19.569	0.8261	Medium	11.55	11.93	2	31.751	0.8279	Medium	11.55
D_D1165H	574	583	IETGAPDGSF	9.08	1	7	8.98	9.41	0.408	8.319	0.859	Medium	8.98	9.41	0.418	8.524	0.8783	Medium	8.98	9.41	0.423	8.633	0.8631	Medium	8.98	9.41	1.239	25.291	0.8807	Medium	8.98	9.41	1.21	24.685	0.8699	Medium	8.98	9.41	1.245	25.405	0.8812	Medium	8.98	9.41	1.723	35.163	0.8904	Medium	8.98
D_D1165H	584	590	LVRESET	4.35	2	5	4.28	4.77	1.292	36.906	0.9105	High	4.29	4.77	1.219	34.839	0.9173	High	4.29	4.77	1.276	36.449	0.918	High	4.29	4.77	1.456	41.598	0.931	High	4.29	4.77	1.444	41.243	0.9305	High	4.29	4.77	1.466	41.876	0.9297	High	4.28	4.77	2.041	58.318	0.9302	High	4.27
D_D1165H	595	599	YTLSF	12.25	1	3	12.03	12.44	0.019	0.908	0.8345	Medium	12.02	12.44	0.016	0.78	0.8394	Medium	12.03	12.44	0.063	3.02	0.7622	Medium	12.03	12.44	0.018	0.845	0.8437	Medium	12.03	12.44	0.014	0.687	0.8381	Medium	12.03	12.44	0.083	3.929	0.7755	Medium	12.03	12.44	0.022	1.036	0.8424	Medium	12.03
D_D1165H	600	621	WRNGKVQHCRIHSRQDAGTPKF	5.45	5	19	5.36	6.45	1.488	11.188	0.9258	High	5.36	6.45	1.481	11.132	0.9307	High	5.36	6.45	1.519	11.422	0.9299	High	5.36	6.45	1.8	13.537	0.9281	High	5.36	6.45	1.82	13.687	0.9345	High	5.36	6.45	1.831	13.764	0.9298	High	5.36	6.45	2.282	17.159	0.9237	High	5.36
D_D1165H	622	627	FLTDNL	10.94	1	4	10.8	11.16	0.705	25.171	0.8984	Medium	10.79	11.15	0.669	23.883	0.9084	Medium	10.79	11.15	0.73	26.083	0.8883	Medium	10.8	11.16	1.321	47.19	0.8938	Medium	10.79	11.15	1.311	46.837	0.8853	Medium	10.8	11.16	1.348	48.146	0.8908	Medium	10.79	11.15	1.884	67.282	0.8488	Medium	10.79
D_D1165H	622	629	FLTDNLVF	14.01	1	6	13.83	14.19	0.47	11.2	0.9061	High	13.84	14.2	0.461	10.981	0.9112	High	13.84	14.2	0.495	11.788	0.913	High	13.84	14.2	1.049	24.978	0.9097	High	13.84	14.2	1.05	24.99	0.9028	Medium	13.84	14.2	1.085	25.837	0.9178	High	13.84	14.19	1.757	41.825	0.8976	High	13.83
D_D1165H	628	632	VFDSL	10.45	1	3	10.44	10.7	0.15	7.135	0.8449	Medium	10.44	10.7	0.159	7.578	0.8357	Medium	10.44	10.7	0.166	7.883	0.832	Medium	10.44	10.7	0.786	37.451	0.8571	Medium	10.44	10.7	0.804	38.289	0.8424	Medium	10.44	10.7	0.838	39.919	0.8206	Medium	10.44	10.7	0.921	43.837	0.8301	Medium	10.44
D_D1165H	633	637	YDLIT	9.85	1	3	9.74	10.13	0.029	1.394	0.8475	Medium	9.73	10.13	0.02	0.973	0.8601	Medium	9.73	10.13	0.02	0.949	0.8536	Medium	9.74	10.13	0.009	0.406	0.8323	Medium	9.74	10.13	0.004	0.199	0.8363	Medium	9.74	10.13	0.024	1.143	0.792	Medium	9.73	10.13	0.007	0.336	0.8257	Medium	9.73
D_D1165H	633	646	YDLITHYQQVPLRC	10.28	3	11	10.23	10.39	0.74	9.606	0.8749	High	10.22	10.39	0.743	9.65	0.9084	High	10.22	10.39	0.789	10.248	0.9057	High	10.23	10.39	1.327	17.239	0.9153	High	10.22	10.39	1.33	17.27	0.9124	High	10.23	10.39	1.349	17.513	0.9143	High	10.22	10.39	2.027	26.323	0.9195	High	10.22
D_D1165H	633	648	YDLITHYQQVPLRCNE	9.85	3	13	9.75	9.85	1.201	13.195	0.923	High	9.74	9.84	1.179	12.958	0.9303	High	9.74	9.84	1.237	13.598	0.929	High	9.75	9.85	1.731	19.017	0.9199	High	9.74	9.84	1.74	19.121	0.9251	High	9.75	9.85	1.76	19.34	0.9216	High	9.74	9.84	2.385	26.206	0.9189	High	9.74
D_D1165H	636	646	ITHYQQVPLRC	7.78	2	8	7.67	7.89	0.826	14.748	0.9068	High	7.68	7.89	0.786	14.038	0.9528	High	7.68	7.89	0.814	14.529	0.9393	High	7.68	7.89	1.397	24.95	0.931	High	7.68	7.89	1.429	25.512	0.925	High	7.68	7.89	1.4	24.994	0.9357	High	7.68	7.89	2.091	37.331	0.9426	High	7.68
D_D1165H	638	648	HYQQVPLRCNE	6.79	3	8	6.83	6.91	1.336	23.854	0.881	High	6.84	6.91	1.28	22.849	0.8917	High	6.84	6.91	1.376	24.58	0.8966	High	6.84	6.92	1.886	33.675	0.881	Medium	6.84	6.91	1.874	33.466	0.8771	Medium	6.84	6.92	1.928	34.422	0.8949	Medium	6.84	6.91	2.466	44.035	0.8485	Medium	6.84
D_D1165H	640	648	QQVPLRCNE	6.68	2	6	6.57	6.8	1.662	39.583	0.8855	Medium	6.58	6.8	1.596	38.001	0.9264	Medium	6.58	6.8	1.643	39.126	0.9149	Medium	6.58	6.81	2.19	52.15	0.9275	Medium	6.58	6.81	2.198	52.338	0.9111	Medium	6.58	6.81	2.183	51.974	0.9131	Medium	6.58	6.8	2.679	63.789	0.9096	Medium	6.74
D_D1165H	649	662	FEMRLSEPVPQTNA	9.69	2	10	9.74	9.79	1.5	21.429	0.9282	High	9.73	9.78	1.494	21.343	0.9388	High	9.73	9.78	1.575	22.499	0.9364	High	9.74	9.79	2.678	38.261	0.934	High	9.74	9.79	2.651	37.866	0.9308	High	9.74	9.79	2.691	38.443	0.9207	High	9.73	9.78	3.47	49.567	0.9367	High	9.73
D_D1165H	649	667	FEMRLSEPVPQTNAHESKE	8.33	4	15	8.19	8.76	1.589	15.131	0.9342	High	8.18	8.76	1.565	14.909	0.9306	High	8.18	8.76	1.64	15.618	0.9315	High	8.19	8.76	2.826	26.912	0.9298	High	8.18	8.76	2.871	27.341	0.9311	High	8.18	8.76	2.875	27.383	0.9322	High	8.18	8.76	3.81	36.283	0.9348	High	8.18
D_D1165H	650	662	EMRLSEPVPQTNA	8.18	2	9	8.12	8.19	1.626	25.815	0.8151	Medium	8.11	8.18	1.606	25.486	0.8249	Medium	8.11	8.18	1.687	26.774	0.8522	Medium	8.12	8.19	2.578	40.915	0.8026	Medium	8.11	8.18	2.583	40.999	0.7826	Medium	8.12	8.18	2.622	41.62	0.7998	Medium	8.11	8.18	3.116	49.464	0.7782	Medium	8.11
D_D1165H	650	667	EMRLSEPVPQTNAHESKE	6.68	4	14	6.57	7.08	1.928	19.669	0.9167	High	6.58	7.08	1.898	19.363	0.9249	High	6.58	7.08	1.977	20.173	0.9229	High	6.58	7.08	3.064	31.266	0.9097	High	6.58	7.08	3.101	31.641	0.9064	High	6.58	7.08	3.105	31.686	0.9107	High	6.58	7.08	3.844	39.225	0.8993	Medium	6.74
D_D1165H	651	662	MRLSEPVPQTNA	7.8	2	8	7.67	7.77	1.68	30.001	0.8676	Medium	7.68	7.77	1.588	28.349	0.8727	Medium	7.68	7.77	1.719	30.698	0.8551	Medium	7.68	7.77	2.24	40.005	0.8806	High	7.68	7.77	2.282	40.755	0.8684	Medium	7.68	7.77	2.292	40.928	0.8747	Medium	7.68	7.77	2.776	49.572	0.8657	High	7.68
D_D1165H	651	667	MRLSEPVPQTNAHESKE	6.4	4	13	6.2	6.62	1.884	20.7	0.9456	High	6.21	6.63	1.793	19.704	0.9376	High	6.21	6.63	1.898	20.853	0.9421	High	6.21	6.63	2.677	29.419	0.9313	High	6.21	6.63	2.713	29.813	0.9218	High	6.21	6.63	2.718	29.869	0.9345	High	6.21	6.63	3.441	37.812	0.9336	Medium	6.2
D_D1165H	668	682	WYHASLTRAQAEHML	9.41	3	13	9.55	9.66	1.082	11.894	0.9038	High	9.54	9.66	1.049	11.533	0.9107	High	9.54	9.66	1.156	12.708	0.9169	High	9.55	9.66	1.838	20.195	0.8877	High	9.54	9.66	1.904	20.925	0.8955	High	9.55	9.66	1.899	20.873	0.8532	Medium	9.54	9.66	2.7	29.675	0.9096	High	9.54
D_D1165H	674	682	TRAQAEHML	6.79	2	7	6.68	7.12	0.249	5.079	0.9105	High	6.69	7.12	0.241	4.923	0.9174	High	6.69	7.12	0.263	5.358	0.9148	High	6.69	7.13	0.528	10.775	0.9049	High	6.69	7.12	0.52	10.607	0.9165	High	6.69	7.13	0.531	10.84	0.9097	Medium	6.68	7.12	0.865	17.651	0.9141	High	6.74
D_D1165H	683	691	MRVPRDGAF	8.07	2	6	7.99	8.3	0.099	2.355	0.8948	Medium	7.99	8.3	0.096	2.297	0.9118	Medium	7.99	8.3	0.126	3.001	0.9062	Medium	7.99	8.3	0.225	5.347	0.9114	Medium	7.99	8.3	0.226	5.379	0.9176	Medium	7.99	8.3	0.223	5.302	0.9053	Medium	7.99	8.3	0.351	8.365	0.9142	Medium	7.99
D_D1165H	692	701	LVRKRNEPNS	3.34	3	7	3.26	3.75	1.66	33.886	0.9517	High	3.26	3.75	1.622	33.102	0.9661	High	3.26	3.75	1.693	34.558	0.9614	High	3.26	3.75	2.453	50.066	0.964	High	3.26	3.75	2.453	50.071	0.9415	High	3.26	3.75	2.446	49.921	0.9697	High	3.26	3.74	2.48	50.608	0.9692	High	3.26
D_D1165H	692	702	LVRKRNEPNSY	4.14	3	8	4.09	4.76	1.456	25.999	0.9497	High	4.09	4.76	1.408	25.145	0.9534	High	4.09	4.76	1.469	26.239	0.9508	High	4.09	4.77	2.161	38.587	0.953	High	4.09	4.77	2.14	38.222	0.9515	High	4.09	4.77	2.148	38.354	0.956	High	4.09	4.76	2.218	39.604	0.9498	High	4.09
D_D1165H	693	702	VRKRNEPNSY	3.93	3	7	3.87	4.33	1.452	29.629	0.9425	High	3.87	4.34	1.427	29.128	0.9392	High	3.87	4.34	1.466	29.921	0.9362	High	3.88	4.34	2.163	44.141	0.9337	High	3.87	4.34	2.18	44.485	0.9437	High	3.88	4.34	2.191	44.705	0.9291	High	3.87	4.33	2.238	45.666	0.9293	High	3.87
D_D1165H	707	725	RAEGKIKHCRVQQEGQTVM	5.03	4	17	4.95	5.69	1.266	10.642	0.928	High	4.96	5.7	1.225	10.294	0.9356	High	4.96	5.7	1.292	10.858	0.9271	High	4.96	5.7	1.918	16.12	0.9324	High	4.96	5.7	1.907	16.029	0.9387	High	4.96	5.7	1.929	16.211	0.9361	High	4.95	5.69	3.635	30.549	0.9369	High	4.95
D_D1165H	723	731	TVMLGNSEF	11.22	1	7	11.16	11.31	0.896	18.279	0.8382	Medium	11.16	11.3	0.93	18.974	0.8406	Medium	11.16	11.3	0.948	19.352	0.8535	Medium	11.17	11.31	1.041	21.246	0.8238	Medium	11.16	11.3	1.043	21.282	0.8195	Medium	11.17	11.31	1.121	22.88	0.8119	Medium	11.16	11.3	1.506	30.734	0.8427	Medium	11.17
D_D1165H	741	758	YEKHPLYRKMKLRYPINE	7.32	3	14	7.6	7.7	0.669	6.829	0.9617	High	7.59	7.69	0.661	6.749	0.9585	High	7.59	7.69	0.688	7.022	0.9591	High	7.6	7.7	1.359	13.868	0.9642	High	7.59	7.69	1.347	13.75	0.9607	High	7.6	7.7	1.384	14.125	0.9596	High	7.59	7.69	2.1	21.43	0.9593	High	7.59
D_D1165H	741	760	YEKHPLYRKMKLRYPINEEA	7.42	3	16	7.29	7.54	0.662	5.915	0.9328	High	7.29	7.53	0.636	5.676	0.921	High	7.29	7.54	0.67	5.985	0.9318	High	7.29	7.54	1.674	14.945	0.9295	High	7.29	7.54	1.7	15.175	0.917	High	7.29	7.54	1.66	14.818	0.9207	High	7.29	7.53	2.826	25.228	0.916	Medium	7.29
D_D1165H	747	758	YRKMKLRYPINE	7.16	4	9	7.2	7.34	0.608	9.652	0.9467	High	7.21	7.34	0.594	9.428	0.9425	High	7.21	7.34	0.637	10.114	0.9446	High	7.21	7.34	1.021	16.206	0.9504	High	7.21	7.34	1.029	16.327	0.9486	High	7.21	7.34	1.051	16.679	0.947	High	7.2	7.34	1.647	26.142	0.9433	High	7.21
D_D1165H	761	774	LEKIGTAEPDYGAL	9.85	2	11	9.71	10.32	3.644	47.318	0.9057	High	9.71	10.31	3.587	46.586	0.9097	High	9.71	10.31	3.76	48.836	0.9076	High	9.71	10.32	5.383	69.909	0.9178	High	9.71	10.31	5.435	70.58	0.908	High	9.71	10.32	5.429	70.502	0.9055	High	9.71	10.31	5.557	72.168	0.9118	High	9.71
D_D1165H	762	774	EKIGTAEPDYGAL	9.35	2	10	9.22	9.97	3.458	49.396	0.8851	High	9.21	9.97	3.389	48.417	0.8963	High	9.21	9.97	3.584	51.2	0.8988	High	9.22	9.97	4.889	69.84	0.8873	High	9.21	9.97	4.883	69.754	0.8736	High	9.22	9.97	4.917	70.246	0.8908	High	9.21	9.97	5.011	71.591	0.895	High	9.21
D_D1165H	775	782	YEGRNPGF	7.69	1	5	7.56	8.03	2.489	71.114	0.9437	High	7.55	8.02	2.387	68.209	0.9447	High	7.55	8.02	2.496	71.324	0.9446	High	7.56	8.03	2.573	73.524	0.9436	High	7.55	8.02	2.555	73.007	0.9339	High	7.55	8.03	2.557	73.058	0.94	High	7.55	8.02	2.525	72.156	0.9386	High	7.55
D_D1165H	783	792	YVEANPMPTF	11.57	1	6	11.16	12	3.103	73.893	0.9387	High	11.16	12	2.985	71.068	0.9438	High	11.16	12	3.142	74.81	0.9425	High	11.17	12.01	3.413	81.271	0.9428	High	11.16	12	3.424	81.513	0.9347	High	11.17	12.01	3.438	81.853	0.9354	High	11.16	12	3.401	80.987	0.936	High	11.17
D_D1165H	783	801	YVEANPMPTFKCAVKALFD	13.3	3	15	13.35	13.46	3.771	35.917	0.9279	High	13.36	13.46	3.591	34.203	0.9221	High	13.35	13.45	3.797	36.162	0.9209	High	13.36	13.46	4.462	42.499	0.913	High	13.35	13.45	4.508	42.93	0.9137	High	13.36	13.46	4.499	42.849	0.9141	High	13.35	13.45	4.909	46.755	0.9315	High	13.36
D_D1165H	793	800	KCAVKALF	9.3	1	6	9.17	9.44	0.055	1.315	0.898	High	9.16	9.43	0.047	1.116	0.9328	High	9.16	9.43	0.071	1.681	0.9184	High	9.17	9.44	0.181	4.303	0.9428	High	9.16	9.43	0.185	4.405	0.9146	High	9.17	9.44	0.176	4.197	0.9193	High	9.16	9.43	0.361	8.595	0.9395	High	9.16
D_D1165H	793	801	KCAVKALFD	8.87	2	7	8.71	9.3	0.11	2.244	0.8746	Medium	8.7	9.3	0.1	2.041	0.891	Medium	8.7	9.3	0.198	4.037	0.8515	Medium	8.71	9.3	0.229	4.677	0.88	Medium	8.7	9.3	0.293	5.974	0.8565	Medium	8.71	9.3	0.253	5.16	0.8827	Medium	8.7	9.3	0.664	13.55	0.892	Medium	8.7
D_D1165H	801	809	DYKAQREDE	4.2	2	7	4.17	4.56	0.733	14.957	0.9022	High	4.18	4.56	0.732	14.931	0.9305	High	4.18	4.56	0.764	15.601	0.9281	High	4.18	4.56	1.75	35.717	0.9248	High	4.18	4.56	1.751	35.727	0.9198	High	4.18	4.56	1.749	35.688	0.9181	High	4.17	4.56	2.747	56.062	0.9127	High	4.17
D_D1165H	801	810	DYKAQREDEL	7.06	2	8	6.92	7.32	0.729	13.014	0.8964	High	6.92	7.33	0.699	12.486	0.9362	High	6.92	7.33	0.724	12.936	0.9413	High	6.92	7.33	1.602	28.604	0.9131	High	6.92	7.33	1.633	29.161	0.9129	High	6.92	7.33	1.637	29.231	0.9179	High	6.92	7.32	2.536	45.294	0.8987	High	6.92
D_D1165H	802	809	YKAQREDE	3.88	2	6	3.75	4.06	0.657	15.649	0.9396	Medium	3.76	4.06	0.635	15.13	0.9378	Medium	3.76	4.06	0.657	15.654	0.9502	Medium	3.76	4.06	1.295	30.841	0.9312	Medium	3.76	4.06	1.303	31.02	0.9437	Medium	3.76	4.06	1.288	30.67	0.9482	Medium	3.75	4.05	1.99	47.383	0.9376	Medium	3.75
D_D1165H	802	810	YKAQREDEL	6.28	2	7	6.25	6.59	0.626	12.781	0.91	Medium	6.25	6.59	0.613	12.502	0.9128	High	6.25	6.6	0.633	12.923	0.9171	Medium	6.25	6.6	1.152	23.503	0.8921	High	6.25	6.6	1.162	23.711	0.9035	Medium	6.25	6.6	1.171	23.898	0.9088	Medium	6.25	6.59	1.748	35.67	0.9024	High	6.23
D_D1165H	802	811	YKAQREDELT	5.62	2	8	5.6	6.04	0.628	11.219	0.901	High	5.6	6.04	0.585	10.447	0.9391	High	5.6	6.04	0.627	11.205	0.9422	High	5.61	6.04	1.168	20.863	0.9413	High	5.61	6.04	1.159	20.695	0.9421	High	5.61	6.04	1.165	20.807	0.9441	High	5.6	6.04	1.873	33.438	0.9379	Medium	5.41
D_D1165H	810	819	LTFTKSAIIQ	9.41	2	8	9.32	9.55	0.071	1.265	0.9229	Medium	9.31	9.55	0.102	1.817	0.9288	Medium	9.31	9.55	0.082	1.47	0.9378	Medium	9.32	9.55	0.427	7.629	0.9387	Medium	9.32	9.55	0.416	7.422	0.9466	Medium	9.32	9.55	0.411	7.33	0.9427	Medium	9.31	9.55	1.21	21.602	0.911	Medium	9.31
D_D1165H	810	828	LTFTKSAIIQNVEKQDGGW	11	3	17	10.93	11.44	1.675	14.075	0.8946	High	10.92	11.44	1.627	13.672	0.8975	High	10.93	11.44	1.692	14.216	0.9008	High	10.93	11.44	2.718	22.843	0.8994	High	10.93	11.44	2.724	22.894	0.9016	High	10.93	11.44	2.781	23.369	0.8977	High	10.93	11.44	4.341	36.482	0.8927	High	10.93
D_D1165H	811	819	TFTKSAIIQ	7.81	1	7	7.74	8.03	0.058	1.179	0.9001	High	7.74	8.02	0.053	1.091	0.9078	High	7.74	8.02	0.068	1.39	0.9216	High	7.74	8.03	0.387	7.906	0.8982	High	7.74	8.02	0.371	7.578	0.9081	Medium	7.74	8.03	0.404	8.246	0.8873	Medium	7.73	8.02	1.107	22.597	0.8946	High	7.73
D_D1165H	811	822	TFTKSAIIQNVE	8.74	2	10	8.76	8.82	0.112	1.602	0.8532	Medium	8.75	8.82	0.132	1.884	0.8807	Medium	8.75	8.82	0.124	1.77	0.86	Medium	8.76	8.82	0.565	8.066	0.8833	Medium	8.75	8.82	0.568	8.119	0.8671	Medium	8.76	8.82	0.578	8.263	0.8683	Medium	8.75	8.82	1.638	23.407	0.8496	Medium	8.75
D_D1165H	811	828	TFTKSAIIQNVEKQDGGW	10.4	3	16	10.3	10.81	1.66	14.819	0.9248	High	10.3	10.81	1.67	14.913	0.9159	High	10.3	10.81	1.692	15.109	0.9358	High	10.3	10.81	2.714	24.229	0.9317	High	10.3	10.81	2.743	24.495	0.9343	High	10.3	10.81	2.771	24.741	0.9169	High	10.3	10.81	4.245	37.898	0.9359	High	10.29
D_D1165H	812	820	FTKSAIIQN	6.83	1	7	6.72	6.93	0.044	0.896	0.8287	Medium	6.73	6.94	0.072	1.473	0.8771	Medium	6.73	6.94	0.081	1.662	0.8844	Medium	6.73	6.94	0.403	8.217	0.883	Medium	6.73	6.94	0.433	8.83	0.8808	Medium	6.73	6.94	0.422	8.605	0.8423	Medium	6.73	6.94	1.295	26.422	0.8981	Medium	6.75
D_D1165H	812	828	FTKSAIIQNVEKQDGGW	10.17	3	15	10.07	10.62	1.673	15.937	0.9257	High	10.07	10.61	1.619	15.417	0.9326	High	10.07	10.62	1.694	16.131	0.9282	High	10.08	10.62	2.687	25.592	0.9264	High	10.07	10.62	2.692	25.642	0.9321	High	10.07	10.62	2.716	25.863	0.9272	High	10.07	10.61	4.143	39.461	0.9262	High	10.07
D_D1165H	829	844	WRGDYGGKKQLWFPSN	9.74	3	13	9.71	10.18	1.02	11.204	0.902	High	9.71	10.18	1.012	11.125	0.9052	High	9.71	10.18	1.028	11.299	0.903	High	9.71	10.18	1.384	15.21	0.8974	High	9.71	10.18	1.397	15.349	0.9014	High	9.71	10.18	1.406	15.451	0.9028	High	9.71	10.18	1.636	17.98	0.8935	High	9.71
D_D1165H	829	845	WRGDYGGKKQLWFPSNY	10.66	4	14	10.46	11.05	0.862	8.795	0.946	High	10.46	11.04	0.848	8.649	0.9508	High	10.46	11.04	0.894	9.118	0.9488	High	10.46	11.05	1.217	12.418	0.9496	High	10.46	11.04	1.203	12.276	0.9527	High	10.46	11.05	1.224	12.492	0.952	High	10.46	11.04	1.489	15.198	0.9403	High	10.45
D_D1165H	849	860	MINPAILEPERE	10.22	2	8	10.17	10.28	3.128	55.852	0.8979	High	10.16	10.27	3.153	56.301	0.8665	High	10.16	10.27	3.324	59.359	0.9335	High	10.17	10.28	4.794	85.612	0.9268	High	10.16	10.27	4.845	86.521	0.9123	High	10.17	10.28	4.823	86.122	0.9131	High	10.16	10.27	4.784	85.421	0.9241	High	10.16
D_D1165H	849	862	MINPAILEPEREHL	10.28	3	10	9.81	10.75	3.354	47.92	0.9335	High	9.81	10.75	3.316	47.373	0.9367	High	9.81	10.75	3.486	49.796	0.9254	High	9.81	10.76	4.946	70.655	0.9337	High	9.81	10.75	4.986	71.224	0.9298	High	9.81	10.75	4.983	71.181	0.9356	High	9.81	10.75	4.931	70.448	0.9321	High	9.81
D_D1165H	849	871	MINPAILEPEREHLDENSPLGDL	12.05	3	18	11.65	12.46	3.936	31.239	0.9028	High	11.65	12.46	3.816	30.285	0.8847	High	11.65	12.45	4.07	32.299	0.9058	High	11.65	12.46	6.309	50.07	0.9048	High	11.65	12.45	6.363	50.503	0.899	High	11.65	12.46	6.416	50.918	0.909	High	11.65	12.45	7.365	58.455	0.893	High	11.65
D_D1165H	849	872	MINPAILEPEREHLDENSPLGDLL	13.09	3	19	12.99	13.11	3.588	26.98	0.92	High	13	13.12	3.545	26.657	0.9309	High	12.99	13.11	3.716	27.937	0.9243	High	13	13.12	5.983	44.987	0.9254	High	12.99	13.11	6.018	45.245	0.9303	High	13	13.11	6.035	45.377	0.9355	High	12.99	13.11	7.279	54.728	0.9196	High	13
D_D1165H	849	876	MINPAILEPEREHLDENSPLGDLLRGVL	14.06	4	23	13.68	14.25	2.925	18.169	0.9237	High	13.69	14.26	2.922	18.147	0.9347	High	13.69	14.26	3.087	19.172	0.9348	High	13.69	14.26	5.46	33.913	0.9345	High	13.69	14.26	5.371	33.358	0.9235	High	13.69	14.26	5.518	34.275	0.9361	High	13.68	14.25	7.818	48.559	0.9198	High	13.68
D_D1165H	856	871	EPEREHLDENSPLGDL	10.34	3	13	10.28	10.35	1.422	15.622	0.9145	Medium	10.28	10.35	1.387	15.244	0.9168	Medium	10.28	10.35	1.48	16.264	0.9204	Medium	10.29	10.35	2.342	25.738	0.902	Medium	10.28	10.35	2.374	26.088	0.8962	Medium	10.28	10.35	2.371	26.058	0.8911	Medium	10.28	10.35	3.391	37.261	0.9047	Medium	10.28
D_D1165H	856	876	EPEREHLDENSPLGDLLRGVL	13.81	3	18	13.76	13.92	0.7	5.552	0.9322	High	13.76	13.92	0.693	5.501	0.9321	High	13.76	13.92	0.739	5.863	0.9269	High	13.76	13.92	1.865	14.804	0.9185	High	13.76	13.92	1.85	14.685	0.914	High	13.76	13.92	1.88	14.919	0.9026	High	13.76	13.91	4.207	33.386	0.9186	High	13.76
D_D1165H	861	872	HLDENSPLGDLL	12.73	2	9	12.6	12.72	0.688	10.917	0.8888	Medium	12.6	12.72	0.659	10.453	0.9013	Medium	12.6	12.71	0.65	10.316	0.8888	Medium	12.6	12.72	1.493	23.698	0.9099	High	12.6	12.71	1.507	23.919	0.8989	Medium	12.6	12.72	1.516	24.065	0.9035	Medium	12.6	12.71	2.794	44.346	0.9124	Medium	12.6
D_D1165H	861	876	HLDENSPLGDLLRGVL	13.97	3	13	13.86	14.26	0.408	4.481	0.9556	High	13.87	14.26	0.4	4.391	0.918	High	13.87	14.27	0.432	4.742	0.9526	High	13.87	14.27	1.475	16.214	0.9589	High	13.88	14.27	1.491	16.384	0.9228	High	13.86	14.26	1.536	16.874	0.9302	High	13.86	14.26	3.895	42.807	0.9544	High	13.86
D_D1165H	863	871	DENSPLGDL	11.52	1	6	11.3	11.77	0.504	12.003	0.8248	Medium	11.29	11.76	0.499	11.885	0.8029	Medium	11.3	11.77	0.507	12.081	0.811	Medium	11.3	11.77	1.323	31.493	0.8177	Medium	11.3	11.77	1.256	29.9	0.8203	Medium	11.3	11.77	1.323	31.489	0.8205	Medium	11.29	11.77	2.307	54.93	0.8054	Medium	11.3
D_D1165H	863	872	DENSPLGDLL	13.35	1	7	13.25	13.44	0.772	15.755	0.8483	Medium	13.26	13.44	0.783	15.981	0.859	Medium	13.25	13.44	0.806	16.439	0.8428	Medium	13.26	13.44	1.461	29.826	0.897	Medium	13.25	13.44	1.478	30.164	0.8922	Medium	13.26	13.44	1.518	30.973	0.8962	Medium	13.25	13.44	2.557	52.192	0.9359	Medium	13.26
D_D1165H	863	876	DENSPLGDLLRGVL	14.32	2	11	14.13	14.49	0.259	3.367	0.8854	Medium	14.13	14.49	0.286	3.72	0.8933	Medium	14.13	14.49	0.318	4.133	0.8911	Medium	14.13	14.49	1.361	17.675	0.8928	Medium	14.13	14.49	1.306	16.967	0.8708	Medium	14.13	14.49	1.364	17.709	0.8858	Medium	14.12	14.49	3.762	48.855	0.8938	Medium	14.13
D_D1165H	872	882	LRGVLDVPACQ	9.69	2	8	9.67	9.96	0.143	2.561	0.8296	Medium	9.67	9.95	0.107	1.913	0.8655	Medium	9.67	9.95	0.108	1.933	0.8681	Medium	9.67	9.96	0.574	10.258	0.8343	Medium	9.67	9.95	0.569	10.158	0.8283	Medium	9.67	9.96	0.596	10.65	0.83	Medium	9.67	9.95	1.397	24.944	0.8037	Medium	9.67
D_D1165H	877	882	DVPACQ	5.3	1	3	5.1	5.66	0.051	2.427	0.9283	High	5.1	5.66	0.055	2.63	0.9207	High	5.1	5.66	0.039	1.877	0.9423	High	5.1	5.66	0.185	8.806	0.9332	High	5.1	5.66	0.179	8.51	0.9402	High	5.1	5.66	0.186	8.863	0.9374	High	5.1	5.66	0.565	26.912	0.9425	High	5.1
D_D1165H	883	894	IAIRPEGKNNRL	6.19	3	9	5.97	6.52	2.268	36.007	0.934	High	5.97	6.52	2.195	34.841	0.941	High	5.97	6.52	2.302	36.543	0.9395	High	5.98	6.52	3.231	51.283	0.9346	High	5.97	6.52	3.248	51.55	0.9393	High	5.98	6.52	3.253	51.634	0.938	High	5.97	6.52	3.771	59.855	0.9366	High	5.97
D_D1165H	883	896	IAIRPEGKNNRLFV	8.61	4	11	8.77	8.84	1.975	25.646	0.9313	High	8.77	8.84	1.934	25.118	0.9386	High	8.77	8.84	2.039	26.486	0.9391	High	8.77	8.84	3.051	39.625	0.9126	High	8.77	8.84	3.039	39.461	0.9332	High	8.77	8.84	3.04	39.48	0.928	High	8.77	8.83	3.823	49.651	0.9061	High	8.77
D_D1165H	898	906	SISMPSVAQ	8.93	1	6	8.94	9	1.939	46.174	0.8773	Medium	8.94	9	1.884	44.854	0.8834	Medium	8.94	9	1.991	47.405	0.8753	Medium	8.94	9	2.572	61.243	0.8542	Medium	8.94	9	2.552	60.764	0.8261	Medium	8.94	9	2.558	60.903	0.8328	Medium	8.93	8.99	2.87	68.324	0.8645	Medium	8.93
D_D1165H	898	909	SISMPSVAQWSL	13.51	1	9	13.39	13.81	2.019	32.046	0.9071	Medium	13.39	13.81	2.032	32.259	0.9011	Medium	13.39	13.81	2.144	34.034	0.8921	Medium	13.39	13.81	3.513	55.761	0.9023	Medium	13.38	13.81	3.558	56.472	0.8635	Medium	13.39	13.81	3.544	56.249	0.8807	Medium	13.39	13.81	3.928	62.343	0.9032	Medium	13.39
D_D1165H	902	909	PSVAQWSL	12.36	1	6	12.11	12.56	1.569	37.362	0.9167	High	12.11	12.56	1.562	37.201	0.9211	High	12.11	12.55	1.641	39.065	0.9077	High	12.12	12.56	3.034	72.243	0.9014	High	12.11	12.55	3.068	73.045	0.8862	High	12.12	12.56	3.071	73.108	0.9039	High	12.11	12.55	3.224	76.751	0.906	High	12.12
D_D1165H	910	916	DVAADSQ	3.94	1	5	3.95	4.11	0.6	17.142	0.8954	Medium	3.95	4.11	0.57	16.275	0.9049	Medium	3.95	4.11	0.597	17.047	0.9111	Medium	3.95	4.11	1.122	32.054	0.9223	Medium	3.95	4.11	1.129	32.27	0.9046	Medium	3.95	4.11	1.144	32.693	0.9122	Medium	3.95	4.11	1.536	43.879	0.9281	Medium	3.94
D_D1165H	911	917	VAADSQE	3.88	1	5	3.98	4.05	0.77	22	0.8334	Medium	3.98	4.05	0.763	21.813	0.8511	Medium	3.98	4.05	0.79	22.561	0.8485	Medium	3.98	4.05	1.672	47.774	0.8003	Medium	3.98	4.05	1.667	47.625	0.8115	Medium	3.98	4.05	1.711	48.877	0.8301	Medium	3.98	4.05	2.083	59.509	0.8048	Medium	3.98
D_D1165H	917	921	EELQD	5.82	1	3	5.7	6.14	0.022	1.034	0.8202	Medium	5.7	6.14	0.042	1.982	0.8104	Medium	5.71	6.14	0.032	1.533	0.8133	Medium	5.71	6.14	0.038	1.833	0.8527	Medium	5.71	6.14	0.024	1.16	0.8223	Medium	5.71	6.14	0.07	3.321	0.8089	Medium	5.7	6.14	0.087	4.142	0.8394	Medium	5.81
D_D1165H	922	928	WVKKIRE	4.93	2	5	4.9	5.28	0.027	0.778	0.9521	Medium	4.9	5.28	0.026	0.757	0.9699	Medium	4.9	5.28	0.027	0.761	0.935	Medium	4.9	5.29	0.037	1.068	0.954	Medium	4.9	5.29	0.034	0.981	0.967	Medium	4.9	5.29	0.027	0.785	0.9669	Medium	4.89	5.28	0.043	1.225	0.9195	Medium	4.89
D_D1165H	922	934	WVKKIREVAQTAD	6.52	2	11	6.36	6.77	1.619	21.025	0.9474	High	6.36	6.77	1.567	20.353	0.9493	High	6.36	6.77	1.655	21.491	0.9464	High	6.36	6.77	2.533	32.897	0.9395	High	6.36	6.77	2.548	33.097	0.9393	High	6.36	6.77	2.552	33.144	0.9445	High	6.36	6.77	3.143	40.821	0.9321	High
D_D1165H	922	935	WVKKIREVAQTADA	6.85	2	12	6.88	7.04	2.111	25.135	0.9166	High	6.88	7.04	2.038	24.26	0.9324	High	6.88	7.04	2.14	25.476	0.9352	High	6.88	7.04	2.98	35.473	0.914	High	6.88	7.04	3.001	35.73	0.9222	High	6.88	7.04	3.03	36.074	0.9255	High	6.88	7.04	3.595	42.799	0.9184	High	6.88
D_D1165H	929	935	VAQTADA	4.03	1	5	4.01	4.19	2.115	60.427	0.8256	Medium	4.02	4.19	2.045	58.439	0.8467	Medium	4.02	4.19	2.165	61.852	0.8574	Medium	4.02	4.19	2.846	81.327	0.891	Medium	4.02	4.19	2.809	80.269	0.862	Medium	4.02	4.19	2.846	81.31	0.8576	Medium	4.01	4.19	2.953	84.359	0.8689	Medium	4.01
D_D1165H	929	937	VAQTADARL	6.67	2	7	6.54	6.72	3.469	70.792	0.8689	Medium	6.54	6.72	3.358	68.529	0.8438	Medium	6.54	6.72	3.537	72.179	0.8563	Medium	6.55	6.72	4.173	85.168	0.8625	Medium	6.55	6.72	4.218	86.091	0.8475	Medium	6.55	6.72	4.189	85.498	0.8632	Medium	6.54	6.72	4.241	86.544	0.8664	Medium
D_D1165H	938	942	TEGKM	3.89	1	3	3.9	4.18	1.695	80.695	0.8868	Medium	3.91	4.18	1.634	77.825	0.8914	Medium	3.91	4.18	1.715	81.674	0.8965	Medium	3.91	4.19	1.699	80.894	0.8948	Medium	3.91	4.19	1.701	80.981	0.8829	Medium	3.91	4.19	1.723	82.057	0.8866	Medium	3.9	4.18	1.696	80.783	0.9107	Medium	3.9
D_D1165H	938	953	TEGKMMERRKKIALEL	7.43	4	14	7.48	7.56	3.037	30.992	0.9074	Medium	7.48	7.56	2.932	29.917	0.9153	Medium	7.49	7.56	3.099	31.626	0.9099	Medium	7.49	7.56	3.982	40.629	0.9243	Medium	7.49	7.56	3.979	40.607	0.9224	Medium	7.49	7.56	3.978	40.592	0.9159	Medium	7.48	7.56	4.194	42.799	0.9179	Medium	7.48
D_D1165H	943	951	MERRKKIAL	4.84	2	7	4.85	5.18	2.028	41.38	0.9503	Medium	4.86	5.18	1.947	39.74	0.9521	Medium	4.86	5.18	2.024	41.304	0.9501	Medium	4.86	5.19	2.568	52.412	0.9548	Medium	4.86	5.18	2.563	52.316	0.9344	Medium	4.86	5.19	2.585	52.746	0.9318	Medium	4.85	5.18	2.707	55.236	0.9526	Medium	4.85
D_D1165H	945	953	RRKKIALEL	7.11	3	7	7.06	7.34	1.145	23.369	0.8843	Medium	7.07	7.34	1.108	22.61	0.8834	Medium	7.07	7.34	1.177	24.029	0.892	Medium	7.07	7.34	2.063	42.1	0.8985	Medium	7.07	7.34	2.1	42.864	0.8578	Medium	7.07	7.34	2.072	42.292	0.8566	Medium	7.06	7.34	2.266	46.247	0.8735	Medium	7.06
D_D1165H	957	968	VVYCRPVPFDEE	10.06	2	8	9.78	10.26	1.012	18.079	0.8316	Medium	9.78	10.25	0.972	17.365	0.8501	Medium	9.78	10.25	0.953	17.012	0.8445	Medium	9.78	10.26	1.277	22.796	0.829	Medium	9.78	10.26	1.329	23.727	0.8448	Medium	9.78	10.26	1.346	24.043	0.8427	Medium	9.77	10.25	1.565	27.943	0.8449	Medium	9.77
D_D1165H	957	976	VVYCRPVPFDEEKIGTERAC	9.15	3	16	9.18	9.28	2.601	23.221	0.9235	High	9.17	9.27	2.508	22.389	0.9197	High	9.17	9.27	2.682	23.947	0.9337	High	9.18	9.28	4.227	37.745	0.8956	Medium	9.17	9.27	4.287	38.276	0.9072	Medium	9.18	9.28	4.283	38.242	0.8997	Medium	9.17	9.27	5.34	47.674	0.9037	High	9.17
D_D1165H	959	967	YCRPVPFDE	9.14	2	5	9.01	9.11	0.957	27.353	0.9123	Medium	9	9.1	0.878	25.093	0.9227	Medium	9	9.1	0.918	26.232	0.9077	Medium	9.01	9.11	1.008	28.811	0.9377	Medium	9	9.11	1.008	28.794	0.9309	Medium	9.01	9.11	1.016	29.022	0.9274	Medium	9	9.1	1.112	31.766	0.9443	Medium	9
D_D1165H	968	976	EKIGTERAC	4.72	2	7	4.8	4.85	2.017	41.158	0.9435	High	4.81	4.85	1.985	40.507	0.9461	High	4.81	4.85	2.059	42.021	0.9437	High	4.81	4.85	3.289	67.121	0.9448	High	4.81	4.85	3.306	67.463	0.9361	High	4.81	4.85	3.321	67.78	0.9421	High	4.8	4.84	3.735	76.228	0.9458	High	4.8
D_D1165H	977	1003	YRDMSSFPETKAEKYVNKAKGKKFLQY	8.44	5	24	8.11	8.81	1.081	6.435	0.9123	High	8.11	8.81	1.065	6.34	0.9155	High	8.11	8.81	1.137	6.768	0.9138	High	8.11	8.82	2.638	15.702	0.9163	High	8.11	8.81	2.617	15.577	0.9151	High	8.11	8.81	2.658	15.822	0.9138	High	8.1	8.81	4.13	24.586	0.9114	High	8.1
D_D1165H	978	983	RDMSSF	7.96	1	4	7.93	8.03	0.266	9.512	0.8112	Medium	7.93	8.02	0.287	10.235	0.8291	Medium	7.93	8.02	0.28	9.989	0.8138	Medium	7.93	8.03	0.534	19.057	0.8331	Medium	7.93	8.02	0.539	19.246	0.8157	Medium	7.93	8.03	0.559	19.974	0.8111	Medium	7.93	8.02	0.637	22.739	0.8138	Medium	7.93
D_D1165H	978	1008	RDMSSFPETKAEKYVNKAKGKKFLQYNRLQL	8.77	4	28	8.59	9.12	0.971	4.953	0.9659	High	8.58	9.11	0.956	4.877	0.9638	High	8.58	9.11	1.017	5.189	0.9626	High	8.59	9.12	2.311	11.793	0.9587	High	8.58	9.11	2.313	11.803	0.9583	High	8.59	9.12	2.365	12.066	0.9574	High	8.58	9.11	3.69	18.827	0.9598	High	8.58
D_D1165H	984	1008	PETKAEKYVNKAKGKKFLQYNRLQL	8.01	4	23	7.96	8.06	0.752	4.671	0.9449	High	7.95	8.06	0.761	4.729	0.9529	High	7.95	8.06	0.894	5.552	0.9346	High	7.96	8.06	1.88	11.676	0.9525	High	7.96	8.06	1.839	11.424	0.9397	High	7.96	8.06	1.901	11.809	0.9438	High	7.95	8.05	3.143	19.522	0.9416	High	7.95
D_D1165H	987	1003	KAEKYVNKAKGKKFLQY	5.89	4	15	5.91	6.02	0.471	4.488	0.9221	High	5.91	6.02	0.451	4.294	0.9334	High	5.92	6.02	0.477	4.544	0.9172	High	5.92	6.03	1.265	12.046	0.897	High	5.92	6.02	1.24	11.81	0.9091	High	5.92	6.03	1.207	11.493	0.8985	High	5.91	6.02	2.171	20.676	0.9056	High	5.92
D_D1165H	1009	1018	SRIYPKGQRL	5.55	3	7	5.47	6.02	0.8	16.323	0.9523	High	5.47	6.02	0.793	16.179	0.9499	High	5.47	6.02	0.834	17.017	0.9345	High	5.47	6.03	1.601	32.664	0.9571	High	5.47	6.02	1.6	32.645	0.9495	High	5.47	6.03	1.607	32.799	0.9512	High	5.47	6.02	2.25	45.92	0.9521	High	5.41
D_D1165H	1009	1022	SRIYPKGQRLDSSN	5.04	3	11	5.04	5.16	0.962	12.5	0.8943	High	5.04	5.17	0.976	12.679	0.9192	High	5.04	5.17	1.025	13.313	0.9153	High	5.04	5.17	2.02	26.237	0.9032	High	5.04	5.17	2.08	27.018	0.9353	High	5.04	5.17	2.099	27.265	0.9133	High	5.04	5.16	3.4	44.16	0.9005	High	5.04
D_D1165H	1009	1029	SRIYPKGQRLDSSNYDPLPMW	11.46	4	16	11.21	11.89	0.532	4.751	0.887	High	11.2	11.89	0.522	4.664	0.8997	High	11.2	11.89	0.522	4.66	0.8937	High	11.21	11.9	1.173	10.477	0.8829	High	11.2	11.89	1.169	10.439	0.9008	High	11.21	11.9	1.232	10.998	0.8918	High	11.2	11.89	2.029	18.112	0.8876	High	11.21
D_D1165H	1009	1032	SRIYPKGQRLDSSNYDPLPMWICG	12.63	4	19	12.38	12.88	0.469	3.529	0.9086	High	12.39	12.89	0.441	3.317	0.9163	High	12.38	12.88	0.429	3.223	0.9122	High	12.38	12.89	0.979	7.359	0.8862	High	12.38	12.88	1.019	7.664	0.8795	High	12.38	12.89	1.074	8.076	0.8824	High	12.38	12.88	1.709	12.851	0.8561	Medium	12.38
D_D1165H	1009	1035	SRIYPKGQRLDSSNYDPLPMWICGSQL	13.04	3	22	12.73	13.34	0.43	2.792	0.9623	High	12.74	13.34	0.423	2.746	0.9616	High	12.73	13.33	0.452	2.935	0.9522	High	12.74	13.34	0.974	6.325	0.9539	High	12.73	13.33	0.966	6.273	0.9612	High	12.74	13.34	1.001	6.497	0.9599	High	12.73	13.34	1.588	10.309	0.9602	High	12.74
D_D1165H	1012	1018	YPKGQRL	5.61	2	5	5.6	5.73	0.687	19.629	0.773	Medium	5.6	5.73	0.653	18.662	0.8071	Medium	5.6	5.73	0.687	19.633	0.808	Medium	5.61	5.73	1.392	39.773	0.7602	Medium	5.61	5.73	1.34	38.287	0.7797	Medium	5.61	5.73	1.381	39.454	0.7546	Medium	5.6	5.73	1.979	56.551	0.7723	Medium
D_D1165H	1019	1028	DSSNYDPLPM	11.16	1	6	11.12	11.36	0.048	1.14	0.8826	Medium	11.12	11.35	0.081	1.935	0.8656	Medium	11.12	11.35	0.078	1.848	0.8847	Medium	11.12	11.36	0.067	1.606	0.8795	Medium	11.12	11.35	0.096	2.285	0.8689	Medium	11.12	11.36	0.086	2.043	0.8708	Medium	11.12	11.35	0.202	4.808	0.8724	Medium	11.13
D_D1165H	1019	1029	DSSNYDPLPMW	14.02	1	7	13.9	14.24	0.036	0.737	0.929	High	13.9	14.25	0.035	0.712	0.9244	High	13.91	14.25	0.04	0.824	0.9304	High	13.9	14.25	0.043	0.877	0.9158	High	13.91	14.25	0.041	0.835	0.9013	Medium	13.9	14.25	0.045	0.92	0.9176	High	13.9	14.24	0.131	2.678	0.9269	High	13.9
D_D1165H	1029	1035	WICGSQL	11.9	1	5	11.84	11.94	0.064	1.821	0.8576	Medium	11.84	11.93	0.046	1.301	0.8727	Medium	11.84	11.93	0.049	1.398	0.8585	Medium	11.85	11.94	0.051	1.471	0.8882	Medium	11.84	11.93	0.063	1.802	0.8438	Medium	11.85	11.94	0.041	1.169	0.8523	Medium	11.84	11.93	0.056	1.611	0.8526	Medium	11.85
D_D1165H	1030	1035	ICGSQL	8.33	1	4	8.34	8.53	0.006	0.212	0.8287	Medium	8.33	8.53	0.042	1.494	0.8449	Medium	8.33	8.53	0.02	0.731	0.8368	Medium	8.34	8.53	0.038	1.368	0.8187	Medium	8.33	8.53	0.032	1.135	0.8352	Medium	8.34	8.53	0.022	0.782	0.8293	Medium	8.33	8.52	0.021	0.755	0.8384	Medium	8.33
D_D1165H	1036	1049	VALNFQTPDKPMQM	10.61	2	10	10.35	10.95	0.275	3.933	0.9324	High	10.35	10.95	0.28	3.995	0.9396	High	10.35	10.95	0.306	4.378	0.9376	High	10.35	10.96	0.532	7.594	0.94	High	10.35	10.95	0.575	8.212	0.9352	High	10.35	10.96	0.54	7.71	0.9399	High	10.35	10.95	0.565	8.069	0.9371	High	10.35
D_D1165H	1039	1049	NFQTPDKPMQM	9.19	2	7	9.2	9.4	0.26	5.311	0.8879	High	9.2	9.4	0.263	5.358	0.8974	High	9.2	9.4	0.287	5.853	0.8902	High	9.2	9.4	0.561	11.45	0.8892	High	9.2	9.4	0.544	11.102	0.8235	Medium	9.2	9.4	0.519	10.592	0.8239	Medium	9.2	9.4	0.576	11.755	0.8297	Medium	9.2
D_D1165H	1050	1054	NQALF	10.82	1	3	10.74	10.99	0.036	1.718	0.8522	Medium	10.73	10.98	0.05	2.36	0.8506	Medium	10.73	10.98	0.022	1.032	0.8595	Medium	10.74	10.99	0.03	1.424	0.8473	Medium	10.73	10.99	0.027	1.264	0.8621	Medium	10.74	10.99	0.036	1.704	0.8576	Medium	10.73	10.98	0.028	1.316	0.8502	Medium	10.73
D_D1165H	1054	1068	FMAGGHCGYVLQPST	9.52	2	12	9.48	9.66	1.072	12.76	0.883	Medium	9.47	9.66	1.031	12.279	0.8975	Medium	9.47	9.66	1.064	12.668	0.9022	Medium	9.48	9.66	1.218	14.496	0.8925	Medium	9.47	9.66	1.227	14.611	0.888	Medium	9.48	9.66	1.254	14.93	0.8605	Medium	9.47	9.66	2.093	24.92	0.8911	Medium	9.47
D_D1165H	1055	1062	MAGGHCGY	6.2	1	6	6.1	6.37	0.076	1.809	0.8812	Medium	6.1	6.38	0.089	2.122	0.8895	Medium	6.1	6.38	0.102	2.418	0.865	Medium	6.1	6.38	0.179	4.257	0.889	Medium	6.1	6.38	0.174	4.14	0.879	Medium	6.1	6.38	0.173	4.131	0.8442	Medium	6.1	6.37	0.673	16.017	0.8967	Medium	6.09
D_D1165H	1055	1068	MAGGHCGYVLQPST	8.45	2	11	8.39	8.53	1.279	16.609	0.7936	Medium	8.38	8.53	1.17	15.201	0.7609	Medium	8.38	8.53	1.284	16.672	0.7635	Medium	8.39	8.53	1.364	17.711	0.8005	Medium	8.38	8.53	1.354	17.581	0.7703	Medium	8.39	8.53	1.349	17.517	0.7781	Medium	8.38	8.52	1.736	22.539	0.8095	Medium	8.38
D_D1165H	1063	1068	VLQPST	5.66	1	3	5.58	5.68	1.28	60.93	0.8062	Medium	5.59	5.69	1.163	55.384	0.8119	Medium	5.59	5.69	1.248	59.432	0.8134	Medium	5.59	5.69	1.282	61.071	0.8183	Medium	5.59	5.69	1.294	61.616	0.8215	Medium	5.59	5.69	1.321	62.915	0.8205	Medium	5.58	5.68	1.346	64.098	0.7927	Medium
D_D1165H	1063	1069	VLQPSTM	7.96	1	4	7.79	8.2	1.229	43.894	0.8636	Medium	7.79	8.2	1.211	43.256	0.866	Medium	7.79	8.2	1.261	45.051	0.8807	Medium	7.79	8.2	1.227	43.807	0.8691	Medium	7.79	8.2	1.22	43.563	0.8679	Medium	7.79	8.2	1.229	43.903	0.8724	Medium	7.78	8.2	1.236	44.14	0.8791	Medium	7.78
D_D1165H	1063	1082	VLQPSTMRDEAFDPFDKSSL	11.57	3	16	11.33	11.84	1.477	13.188	0.9022	Medium	11.33	11.83	1.463	13.06	0.9069	Medium	11.33	11.83	1.498	13.371	0.9025	Medium	11.33	11.84	2.44	21.781	0.8988	Medium	11.33	11.83	2.491	22.237	0.8998	Medium	11.33	11.84	2.512	22.432	0.9027	Medium	11.33	11.83	2.895	25.847	0.904	Medium	11.34
D_D1165H	1069	1082	MRDEAFDPFDKSSL	11.2	3	11	10.99	11.34	0.677	8.794	0.9316	High	10.98	11.34	0.703	9.127	0.9292	High	10.98	11.34	0.719	9.332	0.9376	High	10.99	11.34	1.564	20.31	0.9296	High	10.99	11.34	1.574	20.438	0.9252	High	10.99	11.34	1.593	20.694	0.931	High	10.98	11.34	1.977	25.678	0.9255	High	10.98
D_D1165H	1070	1082	RDEAFDPFDKSSL	10.93	2	10	10.73	11.15	0.622	8.884	0.924	High	10.72	11.14	0.637	9.098	0.9207	High	10.72	11.14	0.658	9.401	0.9347	High	10.73	11.15	1.491	21.299	0.9217	High	10.73	11.14	1.507	21.529	0.9289	High	10.73	11.15	1.499	21.413	0.9184	High	10.72	11.14	1.879	26.848	0.9126	High	10.72
D_D1165H	1083	1090	RGLEPCVI	10.13	1	5	10.05	10.19	0.418	11.934	0.9057	Medium	10.04	10.19	0.43	12.28	0.8973	Medium	10.04	10.19	0.453	12.935	0.8953	Medium	10.05	10.19	1.097	31.349	0.8886	Medium	10.05	10.19	1.099	31.393	0.8798	Medium	10.05	10.19	1.103	31.511	0.8701	Medium	10.04	10.19	1.173	33.516	0.8938	Medium	10.04
D_D1165H	1083	1091	RGLEPCVIC	10.28	2	6	10.14	10.49	0.423	10.082	0.9034	High	10.14	10.49	0.427	10.176	0.9054	High	10.14	10.49	0.443	10.54	0.9015	High	10.14	10.49	1.062	25.286	0.8983	Medium	10.14	10.49	1.097	26.13	0.8905	Medium	10.14	10.49	1.089	25.919	0.8978	Medium	10.14	10.49	1.161	27.638	0.8933	Medium	10.14
D_D1165H	1092	1106	IEVLGARHLPKNGRG	6.2	4	12	6.09	6.27	1.43	17.019	0.9136	Medium	6.09	6.28	1.356	16.147	0.9152	Medium	6.09	6.28	1.459	17.372	0.8754	Medium	6.09	6.28	1.849	22.009	0.9188	Medium	6.09	6.28	1.801	21.437	0.9115	Medium	6.09	6.28	1.811	21.561	0.9074	Medium	6.09	6.27	1.957	23.303	0.8966	High	6.09
D_D1165H	1092	1109	IEVLGARHLPKNGRGIVC	7.9	4	15	7.93	8.03	1.367	13.023	0.9162	High	7.93	8.02	1.318	12.555	0.9223	High	7.93	8.02	1.384	13.179	0.9156	High	7.93	8.03	1.838	17.501	0.9209	High	7.93	8.02	1.845	17.574	0.9242	High	7.93	8.03	1.873	17.837	0.9217	High	7.93	8.02	2.446	23.294	0.9207	High	7.93
D_D1165H	1092	1115	IEVLGARHLPKNGRGIVCPFVEIE	10.78	5	20	10.92	11.02	0.901	6.433	0.9063	High	10.92	11.02	0.866	6.184	0.9129	High	10.92	11.02	0.921	6.578	0.925	High	10.92	11.02	1.226	8.76	0.9027	High	10.92	11.02	1.208	8.632	0.9088	High	10.92	11.02	1.255	8.967	0.8982	High	10.92	11.02	1.723	12.31	0.9143	High	10.92
D_D1165H	1110	1115	PFVEIE	10.67	1	4	10.69	10.75	0.033	1.164	0.8815	Medium	10.69	10.75	0.029	1.046	0.8853	Medium	10.69	10.75	0.042	1.49	0.8786	Medium	10.7	10.76	0.048	1.702	0.8651	Medium	10.69	10.75	0.035	1.258	0.8521	Medium	10.7	10.75	0.035	1.235	0.8468	Medium	10.69	10.75	0.029	1.046	0.8192	Medium	10.69
D_D1165H	1114	1120	IEVAGAE	6.46	1	5	6.41	6.67	0.268	7.65	0.9107	Medium	6.41	6.67	0.305	8.728	0.9001	Medium	6.41	6.67	0.273	7.801	0.9041	Medium	6.41	6.67	0.565	16.13	0.9156	Medium	6.41	6.67	0.562	16.06	0.9147	Medium	6.41	6.67	0.586	16.746	0.9055	Medium	6.41	6.67	0.677	19.344	0.8377	Medium
D_D1165H	1114	1121	IEVAGAEY	9.14	1	6	9.14	9.21	0.313	7.446	0.925	High	9.14	9.21	0.328	7.815	0.9391	High	9.14	9.21	0.34	8.099	0.9262	High	9.14	9.21	0.932	22.179	0.9203	High	9.14	9.21	0.921	21.926	0.9362	High	9.14	9.21	0.948	22.56	0.9045	High	9.14	9.2	1.248	29.705	0.928	High	9.14
D_D1165H	1114	1130	IEVAGAEYDSTKQKTEF	8.6	3	15	8.65	8.94	0.554	5.275	0.9422	High	8.64	8.94	0.562	5.352	0.9444	High	8.64	8.94	0.59	5.62	0.9447	High	8.65	8.94	1.969	18.756	0.9402	High	8.64	8.94	1.978	18.842	0.9389	High	8.65	8.94	2.005	19.095	0.9299	High	8.64	8.93	3.336	31.771	0.9291	High	8.64
D_D1165H	1122	1130	DSTKQKTEF	6.08	2	7	6.01	6.16	0.296	6.051	0.932	High	6.02	6.17	0.286	5.837	0.939	High	6.02	6.17	0.339	6.913	0.9019	High	6.02	6.17	1.207	24.642	0.9427	High	6.02	6.17	1.219	24.878	0.9371	High	6.02	6.17	1.223	24.969	0.9313	High	6.01	6.16	2.251	45.942	0.9387	High	6.01
D_D1165H	1131	1137	VVDNGLN	5.92	1	5	5.94	6.06	0.063	1.803	0.8898	High	5.94	6.07	0.074	2.104	0.8981	High	5.94	6.07	0.055	1.585	0.8974	High	5.94	6.07	0.065	1.861	0.886	High	5.94	6.07	0.065	1.87	0.8994	High	5.94	6.07	0.073	2.074	0.8933	High	5.94	6.06	0.132	3.785	0.8788	High	5.94
D_D1165H	1131	1154	VVDNGLNPVWPAKPFHFQISNPEF	12.65	2	18	12.67	12.82	0.475	3.767	0.932	High	12.67	12.82	0.428	3.398	0.8986	High	12.66	12.81	0.52	4.13	0.8998	High	12.67	12.82	1.059	8.408	0.8987	High	12.66	12.81	1.011	8.023	0.9104	High	12.67	12.82	1.082	8.584	0.9078	High	12.66	12.82	1.663	13.194	0.9106	High	12.67
D_D1165H	1131	1155	VVDNGLNPVWPAKPFHFQISNPEFA	12.47	3	19	12.26	12.4	0.533	4.01	0.8246	Medium	12.27	12.4	0.542	4.072	0.8288	Medium	12.26	12.4	0.52	3.91	0.8069	Medium	12.27	12.4	1.159	8.711	0.8379	Medium	12.26	12.39	1.089	8.19	0.8271	Medium	12.27	12.4	1.126	8.463	0.8217	Medium	12.26	12.4	1.777	13.362	0.8251	Medium	12.27
D_D1165H	1131	1156	VVDNGLNPVWPAKPFHFQISNPEFAF	13.64	3	20	13.2	13.82	0.497	3.549	0.9271	High	13.2	13.82	0.514	3.674	0.9379	High	13.19	13.82	0.579	4.133	0.9216	High	13.2	13.82	1.135	8.104	0.9263	High	13.19	13.82	1.075	7.682	0.9233	High	13.2	13.82	1.122	8.014	0.9265	High	13.19	13.81	1.721	12.292	0.932	High	13.2
D_D1165H	1138	1147	PVWPAKPFHF	11.46	3	6	11.38	11.57	0.451	10.733	0.919	High	11.38	11.56	0.429	10.215	0.9362	High	11.38	11.56	0.463	11.015	0.9311	High	11.39	11.57	0.789	18.783	0.9184	High	11.38	11.56	0.791	18.834	0.9263	High	11.38	11.57	0.788	18.766	0.9228	High	11.38	11.56	1.209	28.789	0.8993	High	11.39
D_D1165H	1138	1154	PVWPAKPFHFQISNPEF	12.2	3	12	12.17	12.28	0.491	5.844	0.9442	High	12.18	12.28	0.494	5.885	0.9476	High	12.17	12.28	0.521	6.205	0.9394	High	12.17	12.28	1.092	13.005	0.9477	High	12.17	12.28	1.1	13.101	0.9381	High	12.17	12.28	1.111	13.224	0.9473	High	12.17	12.28	1.66	19.759	0.9476	High	12.17
D_D1165H	1138	1156	PVWPAKPFHFQISNPEFAF	13.14	3	14	12.94	13.52	0.474	4.841	0.9489	High	12.95	13.53	0.474	4.841	0.9523	High	12.94	13.52	0.501	5.114	0.9511	High	12.95	13.53	1.052	10.738	0.9359	High	12.94	13.52	1.073	10.947	0.939	High	12.95	13.53	1.112	11.348	0.94	High	12.94	13.52	1.62	16.528	0.946	High	12.95
D_D1165H	1148	1154	QISNPEF	9.46	1	4	9.31	9.8	0.058	2.055	0.8939	High	9.31	9.79	0.039	1.401	0.9065	High	9.31	9.79	0.048	1.711	0.9067	High	9.31	9.8	0.067	2.382	0.9026	High	9.31	9.79	0.065	2.311	0.9073	High	9.31	9.8	0.069	2.476	0.9045	High	9.3	9.79	0.302	10.772	0.8926	High	9.3
D_D1165H	1148	1155	QISNPEFA	8.93	1	5	8.78	8.89	0.036	1.04	0.9171	Medium	8.78	8.89	0.069	1.969	0.9003	Medium	8.78	8.89	0.042	1.214	0.93	Medium	8.78	8.89	0.07	2.013	0.9126	Medium	8.78	8.89	0.061	1.737	0.9178	Medium	8.78	8.89	0.085	2.423	0.9057	Medium	8.78	8.88	0.32	9.156	0.9079	Medium	8.78
D_D1165H	1148	1156	QISNPEFAF	12.3	1	6	12.16	12.67	0.031	0.73	0.9337	High	12.17	12.67	0.04	0.955	0.9412	High	12.16	12.66	0.034	0.798	0.9345	High	12.17	12.67	0.068	1.623	0.94	High	12.16	12.66	0.057	1.355	0.9341	High	12.17	12.67	0.073	1.731	0.9208	High	12.16	12.66	0.274	6.528	0.9438	High	12.17
D_D1165H	1158	1166	RFVVYEEDM	10.23	2	7
D_D1165H	1160	1166	VVYEEDM	8.78	1	5
D_D1165H	1167	1172	FSDQNF	9.57	1	4	9.42	9.84	1.054	37.642	0.9161	Medium	9.41	9.83	1.042	37.197	0.9105	Medium	9.42	9.83	1.09	38.944	0.9226	Medium	9.42	9.84	1.696	60.567	0.8879	Medium	9.42	9.84	1.739	62.116	0.912	Medium	9.42	9.84	1.727	61.691	0.9179	Medium	9.41	9.83	1.712	61.126	0.8986	Medium	9.41
D_D1165H	1167	1199	FSDQNFLAQATFPVKGLKTGYRAVPLKNNYSED	10.72	5	29	10.56	10.68	0.821	4.045	0.7896	Medium	10.56	10.67	0.815	4.014	0.8305	Medium	10.56	10.67	0.814	4.012	0.79	Medium	10.56	10.68	1.453	7.157	0.8454	Medium	10.56	10.67	1.465	7.217	0.8269	Medium	10.56	10.68	1.45	7.145	0.8221	Medium	10.56	10.67	2.336	11.505	0.8056	Medium	10.55
D_D1165H	1173	1178	LAQATF	9.08	1	4	9.05	9.19	0.039	1.388	0.8745	Medium	9.05	9.19	0.035	1.255	0.9019	Medium	9.05	9.19	0.046	1.645	0.8977	Medium	9.05	9.19	0.052	1.862	0.8975	Medium	9.05	9.19	0.056	2.009	0.8983	Medium	9.05	9.19	0.07	2.496	0.8877	Medium	9.04	9.19	0.23	8.213	0.8975	Medium	9.04
D_D1165H	1173	1196	LAQATFPVKGLKTGYRAVPLKNNY	8.62	4	20	8.61	8.76	0.15	1.073	0.8942	Medium	8.61	8.76	0.145	1.036	0.9015	Medium	8.61	8.76	0.151	1.081	0.8764	Medium	8.61	8.76	0.649	4.636	0.903	Medium	8.61	8.76	0.634	4.53	0.9021	Medium	8.61	8.76	0.648	4.63	0.8942	Medium	8.61	8.76	1.253	8.947	0.8996	Medium	8.61
D_D1165H	1173	1199	LAQATFPVKGLKTGYRAVPLKNNYSED	8.55	5	23	8.37	9.07	0.135	0.839	0.9233	High	8.37	9.06	0.154	0.955	0.9304	High	8.37	9.06	0.154	0.959	0.9274	High	8.37	9.07	0.596	3.703	0.9283	High	8.37	9.06	0.589	3.658	0.9301	High	8.37	9.07	0.618	3.836	0.9299	High	8.36	9.06	1.313	8.152	0.9259	High	8.36
D_D1165H	1174	1199	AQATFPVKGLKTGYRAVPLKNNYSED	8.18	4	22	8.14	8.24	0.211	1.367	0.8971	High	8.14	8.24	0.22	1.429	0.9096	High	8.14	8.24	0.193	1.255	0.9006	High	8.14	8.24	0.706	4.587	0.9138	High	8.14	8.24	0.659	4.279	0.8849	High	8.14	8.24	0.713	4.628	0.89	High	8.14	8.24	1.373	8.915	0.899	High	8.14
D_D1165H	1176	1199	ATFPVKGLKTGYRAVPLKNNYSED	8.12	4	20	8	8.12	0.208	1.485	0.9043	High	8	8.11	0.201	1.433	0.9039	High	8	8.11	0.276	1.973	0.8824	High	8	8.12	0.664	4.74	0.881	High	8	8.11	0.617	4.407	0.8761	Medium	8	8.12	0.716	5.112	0.8866	Medium	7.99	8.11	1.209	8.635	0.8867	High	7.99
D_D1165H	1179	1187	PVKGLKTGY	6.03	2	7	6.05	6.21	0.081	1.658	0.8878	Medium	6.05	6.22	0.101	2.063	0.9336	Medium	6.05	6.22	0.1	2.034	0.8656	Medium	6.05	6.22	0.49	9.998	0.8934	Medium	6.05	6.22	0.48	9.793	0.8908	Medium	6.05	6.22	0.493	10.052	0.8825	Medium	6.05	6.21	1.09	22.235	0.879	Medium	6.04
D_D1165H	1179	1196	PVKGLKTGYRAVPLKNNY	6.81	4	15	6.73	6.81	0.12	1.145	0.8629	Medium	6.74	6.81	0.121	1.155	0.9022	Medium	6.74	6.81	0.059	0.56	0.8695	Medium	6.74	6.82	0.646	6.153	0.9129	Medium	6.74	6.81	0.69	6.573	0.8838	Medium	6.74	6.82	0.692	6.591	0.8849	Medium	6.73	6.81	1.038	9.89	0.894	Medium	6.74
D_D1165H	1188	1199	RAVPLKNNYSED	5.77	3	9	5.63	6.07	0.127	2.022	0.9574	High	5.63	6.07	0.132	2.103	0.9423	High	5.63	6.07	0.135	2.147	0.9525	High	5.63	6.08	0.469	7.449	0.951	High	5.63	6.08	0.45	7.147	0.9584	High	5.63	6.08	0.456	7.241	0.9544	High	5.63	6.07	0.693	10.999	0.9546	High	5.81
E_D1165H+ FGFR	26	33	CRSLEVGT	6.68	2	6	6.55	6.93	0.497	11.822	0.797	Medium	6.55	6.93	0.503	11.981	0.8285	Medium	6.55	6.93	0.483	11.507	0.8086	Medium	6.55	6.93	1.051	25.034	0.8153	Medium	6.55	6.93	1.028	24.467	0.8148	Medium	6.56	6.93	1.021	24.318	0.8201	Medium	6.56	6.93	2.383	56.747	0.7818	Medium	6.55
E_D1165H+ FGFR	26	35	CRSLEVGTVM	9.41	2	8	9.3	9.35	0.447	7.977	0.8652	Medium	9.3	9.35	0.408	7.278	0.8744	Medium	9.3	9.35	0.397	7.098	0.851	Medium	9.29	9.34	1.353	24.163	0.8345	Medium	9.3	9.35	1.317	23.522	0.8541	Medium	9.3	9.35	1.328	23.714	0.851	Medium	9.29	9.35	2.977	53.165	0.8487	Medium	9.3
E_D1165H+ FGFR	33	37	TVMTL	10.28	1	3	10.2	10.24	0.083	3.939	0.8501	Medium	10.21	10.24	0.058	2.746	0.8354	Medium	10.21	10.24	0.082	3.915	0.8378	Medium	10.2	10.24	0.076	3.636	0.8291	Medium	10.2	10.24	0.033	1.578	0.8161	Medium	10.21	10.24	0.081	3.846	0.8186	Medium	10.21	10.24	0.018	0.862	0.8488	Medium	10.2
E_D1165H+ FGFR	37	54	LFYSKKSQRPERKTFQVK	6.62	5	15	6.54	7	0.824	7.844	0.9277	High	6.55	7	0.792	7.539	0.916	High	6.55	7	0.786	7.482	0.9252	High	6.54	6.99	1.589	15.13	0.9296	High	6.54	7	1.63	15.523	0.9332	High	6.55	7	1.62	15.429	0.9125	High	6.55	7	2.022	19.258	0.9357	High	6.54
E_D1165H+ FGFR	38	52	FYSKKSQRPERKTFQ	4.22	3	12	4.23	4.68	1.466	17.454	0.9556	High	4.23	4.68	1.449	17.25	0.9542	High	4.23	4.68	1.403	16.705	0.9544	High	4.23	4.68	2.242	26.696	0.9562	High	4.23	4.68	2.032	24.189	0.9552	High	4.23	4.68	2.101	25.008	0.9563	High	4.23	4.68	2.534	30.169	0.9605	High	4.23
E_D1165H+ FGFR	38	55	FYSKKSQRPERKTFQVKL	6.68	4	15	6.53	7.03	0.809	7.702	0.9283	Medium	6.53	7.03	0.805	7.662	0.9248	Medium	6.53	7.03	0.798	7.6	0.925	Medium	6.52	7.03	1.599	15.224	0.901	Medium	6.53	7.03	1.596	15.204	0.9188	Medium	6.53	7.03	1.605	15.29	0.9151	Medium	6.53	7.03	2.025	19.29	0.8974	Medium	6.53
E_D1165H+ FGFR	53	57	VKLET	5.86	1	3	5.89	5.98	0.811	38.604	0.9407	Medium	5.89	5.98	0.793	37.743	0.9318	Medium	5.89	5.98	0.797	37.967	0.9095	Medium	5.89	5.98	1.715	81.671	0.9265	Medium	5.89	5.98	1.73	82.392	0.9442	Medium	5.89	5.98	1.715	81.681	0.9433	Medium	5.89	5.98	1.902	90.585	0.9128	Medium	5.89
E_D1165H+ FGFR	56	74	ETRQITWSRGADKIEGSID	8.66	4	17	8.61	9.04	2.328	19.566	0.8951	Medium	8.61	9.04	2.276	19.128	0.8952	Medium	8.61	9.04	2.251	18.914	0.8857	Medium	8.61	9.03	3.489	29.318	0.897	Medium	8.61	9.04	3.513	29.518	0.8895	Medium	8.61	9.04	3.502	29.432	0.8791	Medium	8.61	9.03	4.965	41.719	0.896	Medium	8.61
E_D1165H+ FGFR	58	74	RQITWSRGADKIEGSID	8.44	2	15	8.25	8.71	2.124	20.23	0.8725	High	8.25	8.71	2.122	20.209	0.8769	High	8.25	8.71	2.097	19.971	0.8903	High	8.24	8.71	3.299	31.416	0.8594	Medium	8.25	8.71	3.322	31.641	0.8708	Medium	8.25	8.71	3.304	31.465	0.8745	Medium	8.25	8.71	4.778	45.508	0.8627	Medium	8.25
E_D1165H+ FGFR	75	89	IREIKEIRPGKTSRD	4.77	4	12	4.71	5.2	0.698	8.309	0.9554	High	4.71	5.2	0.677	8.064	0.9509	High	4.71	5.2	0.664	7.905	0.9539	High	4.71	5.2	1.596	18.997	0.9519	High	4.71	5.2	1.507	17.941	0.953	High	4.71	5.2	1.536	18.287	0.9566	High	4.71	5.2	2.001	23.818	0.9489	High	4.71
E_D1165H+ FGFR	75	107	IREIKEIRPGKTSRDFDRYQEDPAFRPDQSHCF	8.23	5	28	8.01	8.56	2.847	14.526	0.9004	High	8.01	8.56	2.81	14.336	0.8959	High	8.01	8.56	2.718	13.87	0.8896	High	8.02	8.56	4.68	23.876	0.8945	High	8.01	8.56	4.727	24.118	0.8949	High	8.02	8.56	4.737	24.167	0.8915	High	8.02	8.56	5.775	29.464	0.8797	High	8.01
E_D1165H+ FGFR	78	89	IKEIRPGKTSRD	3.88	4	9	3.83	4.41	0.746	11.844	0.9602	High	3.83	4.41	0.747	11.859	0.9635	High	3.83	4.41	0.726	11.529	0.9561	High	3.83	4.41	1.786	28.347	0.9624	High	3.83	4.41	1.684	26.725	0.9635	High	3.83	4.41	1.69	26.827	0.9528	High	3.83	4.41	2.17	34.443	0.9531	High	3.83
E_D1165H+ FGFR	78	90	IKEIRPGKTSRDF	5.82	4	10	5.65	6.08	0.616	8.807	0.8917	Medium	5.65	6.08	0.622	8.89	0.8936	Medium	5.65	6.08	0.606	8.662	0.8811	Medium	5.65	6.08	1.393	19.902	0.8896	Medium	5.65	6.08	1.402	20.026	0.9005	Medium	5.65	6.08	1.393	19.895	0.8874	Medium	5.65	6.09	2.153	30.761	0.8677	Medium	5.65
E_D1165H+ FGFR	78	106	IKEIRPGKTSRDFDRYQEDPAFRPDQSHC	7.17	4	24	7.02	7.4	3.189	18.98	0.8395	Medium	7.02	7.4	3.171	18.876	0.843	Medium	7.02	7.4	3.079	18.329	0.8346	Medium	7.02	7.4	5.164	30.738	0.8333	Medium	7.02	7.4	5.253	31.269	0.8305	Medium	7.03	7.4	5.298	31.538	0.844	Medium	7.03	7.4	6.333	37.699	0.8123	Medium	7.02
E_D1165H+ FGFR	90	106	FDRYQEDPAFRPDQSHC	7.75	3	13	7.68	8.15	2.82	30.988	0.9497	High	7.68	8.16	2.771	30.454	0.9537	High	7.68	8.16	2.701	29.676	0.9438	High	7.67	8.16	4.193	46.081	0.949	High	7.68	8.16	4.228	46.457	0.9443	High	7.68	8.16	4.19	46.048	0.943	High	7.68	8.16	4.553	50.035	0.9483	High	7.68
E_D1165H+ FGFR	94	107	QEDPAFRPDQSHCF	9.22	2	10	9.12	9.33	1.53	21.858	0.824	Medium	9.12	9.33	1.475	21.069	0.8395	Medium	9.12	9.33	1.454	20.769	0.8361	Medium	9.12	9.33	2.32	33.145	0.8245	Medium	9.12	9.33	2.265	32.358	0.822	Medium	9.13	9.34	2.376	33.945	0.8132	Medium	9.12	9.33	2.579	36.847	0.8344	Medium	9.12
E_D1165H+ FGFR	97	106	PAFRPDQSHC	6.15	2	7	6.16	6.24	1.684	34.373	0.8907	High	6.16	6.24	1.662	33.926	0.8986	High	6.16	6.24	1.648	33.623	0.899	High	6.15	6.24	2.168	44.249	0.9077	High	6.16	6.24	2.227	45.439	0.8807	Medium	6.16	6.24	2.204	44.971	0.8958	High	6.16	6.24	2.485	50.71	0.9061	Medium	6.16
E_D1165H+ FGFR	111	115	YGMEF	12	1	3	11.84	11.91	0.166	7.919	0.8699	Medium	11.83	11.9	0.158	7.527	0.866	Medium	11.83	11.9	0.147	7.02	0.7895	Medium	11.83	11.9	0.424	20.187	0.8483	Medium	11.83	11.9	0.444	21.124	0.8655	Medium	11.84	11.91	0.46	21.901	0.8402	Medium	11.84	11.91	0.503	23.94	0.879	Medium	11.84
E_D1165H+ FGFR	115	122	FRLKTLSL	10.23	2	6	10.21	10.55	0.032	0.765	0.9198	High	10.21	10.56	0.03	0.717	0.9185	High	10.21	10.56	0.024	0.575	0.9125	High	10.21	10.55	0.102	2.431	0.9172	High	10.21	10.56	0.131	3.12	0.8942	Medium	10.22	10.56	0.103	2.463	0.9232	High	10.22	10.56	0.467	11.12	0.9248	High	10.21
E_D1165H+ FGFR	116	122	RLKTLSL	8.5	2	5	8.35	8.75	0.029	0.815	0.9225	Medium	8.35	8.75	0.025	0.708	0.9503	Medium	8.35	8.75	0.03	0.849	0.9374	Medium	8.35	8.76	0.037	1.065	0.9466	Medium	8.35	8.75	0.038	1.1	0.9442	Medium	8.35	8.76	0.003	0.078	0.9294	Medium	8.35	8.75	0.1	2.86	0.9258	Medium	8.35
E_D1165H+ FGFR	123	128	QATSED	3.41	1	4	3.38	3.56	1.146	40.916	0.8198	Medium	3.38	3.56	1.145	40.89	0.8873	Medium	3.38	3.56	1.116	39.86	0.8835	Medium	3.38	3.56	1.609	57.455	0.879	Medium	3.38	3.56	1.619	57.838	0.8796	Medium	3.38	3.56	1.608	57.438	0.8165	Medium	3.38	3.56	1.914	68.361	0.8626	Medium	3.38
E_D1165H+ FGFR	132	140	MWIKGLTWL	14.05	2	7	13.95	14.28	0.009	0.177	0.9374	High	13.95	14.28	0.006	0.12	0.9356	High	13.95	14.28	0.025	0.515	0.9318	High	13.96	14.28	0.002	0.036	0.9567	High	13.95	14.28	0.01	0.206	0.9414	High	13.95	14.28	0.001	0.013	0.9445	High	13.95	14.28	0.005	0.106	0.9207	High	13.95
E_D1165H+ FGFR	133	140	WIKGLTWL	13.86	1	6	13.74	14.07	0.001	0.029	0.9233	High	13.74	14.07	0.021	0.501	0.9225	High	13.74	14.07	0.037	0.886	0.9143	High	13.75	14.07	0.007	0.166	0.9193	High	13.75	14.07	0.013	0.299	0.921	High	13.74	14.07	0.013	0.318	0.9234	High	13.74	14.07	0.039	0.935	0.9197	High	13.74
E_D1165H+ FGFR	141	145	MEDTL	8.66	1	3	8.55	8.83	0.033	1.571	0.8862	Medium	8.55	8.84	0.024	1.136	0.8845	Medium	8.55	8.84	0.039	1.842	0.8784	Medium	8.56	8.84	0.039	1.854	0.8691	Medium	8.55	8.84	0.034	1.622	0.8851	Medium	8.55	8.84	0.043	2.055	0.8835	Medium	8.55	8.83	0.213	10.153	0.834	Medium	8.55
E_D1165H+ FGFR	141	146	MEDTLQ	7.25	1	4	7.18	7.47	0.069	2.48	0.7854	Medium	7.18	7.47	0.107	3.808	0.7887	Medium	7.18	7.47	0.059	2.092	0.7869	Medium	7.18	7.46	0.1	3.577	0.8146	Medium	7.18	7.47	0.13	4.654	0.7827	Medium	7.19	7.47	0.106	3.799	0.7703	Medium	7.19	7.47	0.463	16.546	0.8276	Medium	7.18
E_D1165H+ FGFR	141	156	MEDTLQAATPLQIERW	12.52	3	13	12.39	12.53	0.095	1.042	0.9341	High	12.39	12.53	0.087	0.955	0.9336	High	12.39	12.53	0.105	1.155	0.9065	High	12.39	12.53	0.527	5.786	0.9302	High	12.39	12.54	0.517	5.68	0.9351	High	12.39	12.54	0.515	5.66	0.9367	High	12.39	12.54	1.308	14.369	0.9425	High	12.39
E_D1165H+ FGFR	141	161	MEDTLQAATPLQIERWLRKQF	13.19	4	18	13.04	13.69	0.08	0.634	0.9325	High	13.03	13.69	0.075	0.594	0.9337	High	13.03	13.69	0.06	0.473	0.9264	High	13.04	13.7	0.548	4.346	0.9183	High	13.04	13.69	0.551	4.376	0.9276	High	13.04	13.69	0.545	4.324	0.926	High	13.04	13.69	1.443	11.452	0.9287	High	13.04
E_D1165H+ FGFR	141	162	MEDTLQAATPLQIERWLRKQFY	13.4	4	19	13.41	13.62	0.105	0.79	0.9435	High	13.4	13.61	0.09	0.677	0.9351	High	13.4	13.61	0.087	0.655	0.9403	High	13.4	13.62	0.591	4.442	0.9277	High	13.41	13.62	0.584	4.39	0.9347	High	13.41	13.62	0.57	4.289	0.9343	High	13.41	13.62	1.645	12.365	0.936	High	13.41
E_D1165H+ FGFR	141	181	MEDTLQAATPLQIERWLRKQFYSVDRNREDRISAKDLKNML	12.24	5	38	12.24	12.57	1.42	5.339	0.9466	High	12.24	12.56	1.424	5.353	0.9461	High	12.24	12.56	1.388	5.218	0.9433	High	12.23	12.56	4.125	15.506	0.935	High	12.23	12.57	4.043	15.2	0.9296	High	12.24	12.57	4.098	15.406	0.9256	High	12.24	12.57	6.94	26.091	0.9293	High	12.24
E_D1165H+ FGFR	143	161	DTLQAATPLQIERWLRKQF	13.2	4	16	13	13.47	0.096	0.855	0.9277	High	13	13.46	0.115	1.024	0.9224	High	13	13.46	0.088	0.785	0.909	High	13.01	13.47	0.601	5.363	0.9109	High	13.01	13.47	0.609	5.439	0.9244	High	13.01	13.47	0.591	5.279	0.9107	High	13.01	13.47	1.483	13.245	0.9357	High	13
E_D1165H+ FGFR	146	161	QAATPLQIERWLRKQF	12.25	3	13	12.14	12.62	0.077	0.848	0.9213	Medium	12.14	12.61	0.098	1.073	0.9023	Medium	12.13	12.61	0.08	0.882	0.9199	Medium	12.13	12.61	0.451	4.954	0.901	Medium	12.13	12.62	0.429	4.72	0.9105	Medium	12.14	12.62	0.432	4.744	0.9095	Medium	12.14	12.62	0.801	8.801	0.9141	High	12.14
E_D1165H+ FGFR	146	162	QAATPLQIERWLRKQFY	12.52	4	14	12.64	12.71	0.062	0.636	0.9598	High	12.63	12.71	0.053	0.543	0.9632	High	12.63	12.71	0.06	0.611	0.957	High	12.63	12.7	0.44	4.493	0.9509	High	12.64	12.71	0.409	4.177	0.9515	High	12.64	12.71	0.402	4.106	0.9579	High	12.64	12.71	0.964	9.833	0.9552	High	12.64
E_D1165H+ FGFR	162	181	YSVDRNREDRISAKDLKNML	9.03	3	18	8.88	9.37	1.57	12.46	0.9451	High	8.88	9.37	1.563	12.405	0.9484	High	8.88	9.37	1.51	11.985	0.9467	High	8.88	9.37	3.579	28.404	0.9228	High	8.88	9.37	3.516	27.903	0.9249	High	8.88	9.38	3.536	28.062	0.917	High	8.87	9.37	5.276	41.872	0.9343	High	8.88
E_D1165H+ FGFR	162	184	YSVDRNREDRISAKDLKNMLSQV	10.24	4	21	10.19	10.28	1.569	10.673	0.9309	High	10.2	10.28	1.522	10.351	0.9169	High	10.2	10.28	1.493	10.155	0.9244	High	10.19	10.28	4.351	29.596	0.9092	High	10.2	10.28	4.255	28.947	0.9147	High	10.2	10.28	4.318	29.374	0.9103	High	10.2	10.29	6.746	45.892	0.9349	High	10.19
E_D1165H+ FGFR	182	193	SQVNYRVPNMRF	9.9	3	9	9.75	10.26	2.417	38.371	0.9109	High	9.75	10.26	2.367	37.565	0.899	High	9.75	10.26	2.364	37.532	0.8951	High	9.75	10.26	4.085	64.839	0.903	High	9.75	10.26	4.03	63.966	0.9093	High	9.76	10.27	4.008	63.625	0.9094	High	9.76	10.27	4.934	78.314	0.9008	High	9.75
E_D1165H+ FGFR	185	193	NYRVPNMRF	9.68	3	6	9.53	10.09	2.289	54.51	0.9468	Medium	9.53	10.1	2.253	53.647	0.9433	Medium	9.53	10.1	2.219	52.843	0.9402	Medium	9.53	10.09	3.278	78.039	0.9434	Medium	9.53	10.09	3.287	78.25	0.943	Medium	9.54	10.1	3.274	77.946	0.9404	Medium	9.53	10.1	3.596	85.615	0.9402	Medium	9.53
E_D1165H+ FGFR	186	193	YRVPNMRF	9.68	3	5	9.51	9.98	2.242	64.045	0.9527	High	9.52	9.98	2.21	63.148	0.9544	High	9.52	9.98	2.175	62.136	0.9564	High	9.51	9.98	2.962	84.641	0.9483	High	9.52	9.98	2.995	85.573	0.9558	High	9.52	9.98	2.966	84.749	0.9438	High	9.51	9.97	3.063	87.51	0.9454	High	9.51
E_D1165H+ FGFR	192	201	RFLRERLTDL	8.9	3	8	8.93	9.01	1.693	30.223	0.9189	Medium	8.93	9.01	1.707	30.483	0.9298	Medium	8.93	9.01	1.639	29.272	0.9329	Medium	8.92	9.02	3.46	61.785	0.9097	Medium	8.93	9.01	3.505	62.596	0.914	Medium	8.93	9.02	3.486	62.249	0.9132	Medium	8.93	9.01	3.587	64.047	0.9093	Medium	8.93
E_D1165H+ FGFR	194	201	LRERLTDL	8.31	2	6	8.21	8.73	1.52	36.179	0.8124	Medium	8.21	8.73	1.512	35.996	0.8157	Medium	8.21	8.73	1.416	33.72	0.8176	Medium	8.21	8.73	2.804	66.756	0.8145	Medium	8.21	8.73	2.826	67.274	0.8139	Medium	8.21	8.73	2.816	67.05	0.8168	Medium	8.21	8.72	2.84	67.609	0.8039	Medium	8.21
E_D1165H+ FGFR	202	213	EQRSGDITYGQF	9.68	2	10	9.54	10.07	1.248	17.829	0.8962	High	9.54	10.07	1.191	17.009	0.8974	High	9.54	10.07	1.183	16.895	0.8847	High	9.54	10.07	1.948	27.831	0.8919	High	9.54	10.07	1.927	27.523	0.8913	High	9.55	10.07	1.907	27.237	0.8843	High	9.54	10.08	3.099	44.265	0.8894	High	9.54
E_D1165H+ FGFR	217	221	YRSLM	8.39	1	3	8.36	8.65	0.028	1.315	0.846	Medium	8.36	8.65	0.043	2.07	0.8458	Medium	8.36	8.65	0.028	1.35	0.8481	Medium	8.35	8.66	0.034	1.61	0.8615	Medium	8.36	8.65	0.028	1.315	0.8562	Medium	8.36	8.66	0.042	2.006	0.8484	Medium	8.36	8.65	0.059	2.824	0.8659	Medium	8.36
E_D1165H+ FGFR	221	235	MYSAQKTMDLPFLET	12.73	2	12	12.79	12.87	1.403	16.707	0.8118	Medium	12.79	12.87	1.42	16.903	0.832	Medium	12.79	12.87	1.394	16.594	0.8469	Medium	12.79	12.86	3.125	37.207	0.8069	Medium	12.8	12.87	3.106	36.974	0.8058	Medium	12.8	12.87	2.913	34.674	0.8115	Medium	12.8	12.87	4.764	56.713	0.7995	Medium	12.8
E_D1165H+ FGFR	222	233	YSAQKTMDLPFL	13.14	2	9	12.89	13.5	0.641	10.175	0.8806	Medium	12.88	13.5	0.693	11.007	0.9345	High	12.88	13.49	0.634	10.071	0.9261	High	12.89	13.5	1.844	29.271	0.9295	High	12.89	13.5	1.84	29.212	0.9313	High	12.89	13.5	1.818	28.854	0.9251	High	12.89	13.5	3.387	53.762	0.9221	High	12.89
E_D1165H+ FGFR	222	235	YSAQKTMDLPFLET	12.47	2	11	11.94	13.01	1.403	18.227	0.8998	High	11.93	13.01	1.398	18.158	0.8936	High	11.93	13.01	1.33	17.277	0.8754	High	11.93	13.02	2.974	38.618	0.8978	High	11.93	13.02	2.975	38.639	0.9013	High	11.94	13.01	2.975	38.641	0.8914	High	11.94	13.01	4.492	58.333	0.8929	High	11.94
E_D1165H+ FGFR	236	246	NTLRTGERPEL	7.21	3	8	7.04	7.55	3.477	62.093	0.9398	High	7.04	7.55	3.411	60.912	0.9389	High	7.04	7.55	3.372	60.22	0.9335	High	7.04	7.55	4.305	76.878	0.9374	Medium	7.04	7.55	4.345	77.589	0.9343	Medium	7.04	7.55	4.331	77.346	0.9374	Medium	7.04	7.56	4.344	77.569	0.9323	High	7.04
E_D1165H+ FGFR	247	251	CQVSL	9.14	1	3	8.91	9.06	0.082	3.92	0.7475	Medium	8.91	9.06	0.046	2.196	0.7538	Medium	8.91	9.06	0.135	6.433	0.7382	Medium	8.91	9.06	0.053	2.54	0.7534	Medium	8.91	9.06	0.064	3.038	0.7536	Medium	8.92	9.07	0.054	2.551	0.7326	Medium	8.91	9.06	0.161	7.68	0.7646	Medium	8.91
E_D1165H+ FGFR	247	253	CQVSLSE	7.8	1	5	7.62	7.89	0.244	6.958	0.8948	Medium	7.62	7.9	0.265	7.581	0.9042	Medium	7.62	7.9	0.244	6.983	0.8877	Medium	7.61	7.9	0.683	19.5	0.9096	Medium	7.62	7.9	0.695	19.864	0.9005	Medium	7.62	7.9	0.691	19.747	0.8892	Medium	7.62	7.9	1.031	29.471	0.9165	Medium	7.62
E_D1165H+ FGFR	249	254	VSLSEF	11.41	1	4	11.25	11.54	0.226	8.087	0.8174	Medium	11.25	11.53	0.209	7.481	0.8076	Medium	11.25	11.53	0.204	7.272	0.7963	Medium	11.24	11.53	0.538	19.217	0.8082	Medium	11.24	11.53	0.555	19.811	0.8307	Medium	11.25	11.54	0.537	19.176	0.81	Medium	11.25	11.54	0.778	27.79	0.8338	Medium	11.25
E_D1165H+ FGFR	254	258	FQQFL	11.89	1	3	11.76	12.06	0.025	1.211	0.8521	Medium	11.76	12.05	0.027	1.263	0.8516	Medium	11.76	12.05	0.171	8.123	0.7702	Medium	11.76	12.05	0.017	0.828	0.8599	Medium	11.76	12.05	0.007	0.331	0.8676	Medium	11.76	12.06	0.051	2.428	0.8497	Medium	11.76	12.06	0.064	3.046	0.857	Medium	11.76
E_D1165H+ FGFR	259	265	LEYQGEL	9.84	1	5	9.7	10.09	0.151	4.318	0.9256	High	9.7	10.09	0.137	3.926	0.9206	High	9.7	10.09	0.141	4.026	0.921	High	9.7	10.08	0.67	19.157	0.928	High	9.7	10.09	0.664	18.975	0.9222	High	9.71	10.09	0.666	19.04	0.9275	High	9.7	10.09	1.156	33.025	0.9184	High	9.7
E_D1165H+ FGFR	266	271	WAVDRL	10.39	1	4	10.23	10.55	0.626	22.369	0.8285	Medium	10.23	10.55	0.606	21.654	0.8384	Medium	10.23	10.55	0.584	20.865	0.8499	Medium	10.23	10.55	1.1	39.279	0.8551	Medium	10.23	10.55	1.145	40.91	0.8679	Medium	10.23	10.55	1.128	40.299	0.8754	Medium	10.24	10.55	1.28	45.7	0.8525	Medium	10.23
E_D1165H+ FGFR	276	280	FMLSF	14.12	1	3	13.94	14.31	0.013	0.622	0.8966	Medium	13.94	14.32	0.021	1.016	0.8937	High	13.94	14.32	0.02	0.945	0.8827	High	13.95	14.32	0.026	1.222	0.8838	High	13.95	14.32	0.021	1.015	0.8928	High	13.95	14.31	0.029	1.382	0.8937	High	13.95	14.32	0.081	3.841	0.8921	High	13.94
E_D1165H+ FGFR	281	287	LRDPLRE	7.17	1	4	6.95	7.27	0.075	2.695	0.9023	High	6.95	7.27	0.068	2.443	0.9383	High	6.95	7.27	0.104	3.725	0.8769	Medium	6.94	7.26	0.438	15.66	0.9272	Medium	6.95	7.27	0.427	15.236	0.9208	High	6.95	7.27	0.417	14.903	0.9336	Medium	6.95	7.27	1.311	46.817	0.9148	Medium	6.95
E_D1165H+ FGFR	281	293	LRDPLREIEEPYF	11.83	3	9	11.66	12.25	0.56	8.883	0.928	Medium	11.66	12.24	0.572	9.086	0.9184	Medium	11.66	12.24	0.544	8.642	0.919	Medium	11.65	12.24	1.618	25.68	0.9118	Medium	11.66	12.24	1.617	25.673	0.9127	Medium	11.66	12.25	1.59	25.235	0.9099	Medium	11.66	12.25	2.529	40.148	0.9163	Medium	11.66
E_D1165H+ FGFR	288	293	IEEPYF	11.78	1	3	11.8	11.87	0.189	9.003	0.8839	Medium	11.79	11.87	0.2	9.51	0.8809	Medium	11.79	11.87	0.187	8.882	0.8754	Medium	11.79	11.86	0.36	17.164	0.8852	Medium	11.79	11.87	0.341	16.228	0.9015	Medium	11.8	11.87	0.398	18.959	0.8769	Medium	11.8	11.87	0.343	16.354	0.8956	Medium	11.8
E_D1165H+ FGFR	294	298	FLDEL	11.89	1	3	11.72	12.02	0.025	1.188	0.865	Medium	11.72	12.02	0.022	1.052	0.8669	Medium	11.72	12.02	0.024	1.143	0.8641	Medium	11.71	12.02	0.051	2.413	0.8735	Medium	11.71	12.02	0.052	2.455	0.873	Medium	11.72	12.02	0.074	3.503	0.872	Medium	11.72	12.02	0.124	5.895	0.8755	Medium	11.72
E_D1165H+ FGFR	298	302	LVTFL	13.19	1	3	12.97	13.47	0.011	0.542	0.901	High	12.97	13.47	0.004	0.168	0.9217	High	12.97	13.47	0.012	0.591	0.9102	High	12.97	13.48	0.009	0.429	0.9141	High	12.97	13.48	0.007	0.317	0.9171	High	12.97	13.48	0.02	0.935	0.9193	High	12.97	13.48	0.013	0.635	0.9065	High	12.97
E_D1165H+ FGFR	303	310	FSKENSVW	9.79	2	6	9.66	9.86	0.044	1.059	0.8736	Medium	9.66	9.86	0.05	1.183	0.8863	Medium	9.66	9.86	0.062	1.468	0.8879	Medium	9.66	9.86	0.077	1.837	0.8742	Medium	9.66	9.86	0.081	1.934	0.874	Medium	9.66	9.86	0.062	1.467	0.865	Medium	9.66	9.87	0.14	3.33	0.8581	Medium	9.66
E_D1165H+ FGFR	303	314	FSKENSVWNSQL	10.56	2	10	10.33	10.82	0.132	1.884	0.8546	High	10.33	10.82	0.124	1.766	0.8469	Medium	10.33	10.82	0.11	1.566	0.8465	Medium	10.33	10.82	0.841	12.011	0.8583	High	10.33	10.82	0.789	11.267	0.8416	High	10.33	10.82	0.811	11.591	0.8558	High	10.34	10.81	2.019	28.838	0.8505	High	10.33
E_D1165H+ FGFR	315	329	DAVCPETMNNPLSHY	10.56	2	11	10.06	11.04	0.729	9.466	0.7494	Medium	10.06	11.04	0.733	9.515	0.7544	Medium	10.06	11.04	0.707	9.181	0.7486	Medium	10.06	11.04	1.681	21.83	0.6959	Medium	10.06	11.04	1.696	22.023	0.7012	Medium	10.07	11.05	1.7	22.075	0.6975	Medium	10.07	11.04	2.56	33.244	0.6902	Medium	10.06
E_D1165H+ FGFR	319	329	PETMNNPLSHY	9.73	2	8	9.25	9.96	0.074	1.321	0.9106	High	9.26	9.96	0.07	1.244	0.9117	High	9.26	9.96	0.075	1.347	0.901	High	9.25	9.96	0.246	4.385	0.9102	High	9.26	9.96	0.241	4.304	0.9136	High	9.26	9.97	0.25	4.457	0.9096	High	9.25	9.96	0.907	16.197	0.913	High	9.25
E_D1165H+ FGFR	330	337	WISSSANT	7.66	1	6	7.53	8.04	0.097	2.318	0.9005	High	7.54	8.04	0.105	2.489	0.8999	High	7.54	8.04	0.098	2.324	0.8838	High	7.53	8.03	0.18	4.276	0.8898	High	7.53	8.04	0.176	4.19	0.9009	High	7.54	8.04	0.164	3.902	0.8894	High	7.54	8.04	0.682	16.24	0.914	High	7.53
E_D1165H+ FGFR	330	339	WISSSANTYL	11.57	1	8	11.61	11.86	0.167	2.98	0.9071	Medium	11.61	11.85	0.2	3.573	0.8891	Medium	11.61	11.85	0.183	3.272	0.9051	Medium	11.6	11.85	0.342	6.108	0.8748	Medium	11.61	11.85	0.32	5.719	0.8833	Medium	11.61	11.85	0.353	6.303	0.8749	Medium	11.61	11.86	1.09	19.457	0.9129	Medium	11.61
E_D1165H+ FGFR	344	350	FSSESSL	8.36	1	5	8.34	8.45	0.983	28.09	0.8652	Medium	8.34	8.45	0.981	28.016	0.8805	Medium	8.34	8.45	0.918	26.237	0.8853	Medium	8.34	8.45	2.069	59.116	0.8736	Medium	8.34	8.45	2.083	59.507	0.8776	Medium	8.34	8.45	2.082	59.486	0.8867	Medium	8.35	8.45	2.294	65.546	0.8936	Medium	8.34
E_D1165H+ FGFR	345	350	SSESSL	6.35	1	4	6.27	6.35	0.779	27.805	0.9066	High	6.27	6.35	0.816	29.15	0.9007	High	6.27	6.35	0.743	26.518	0.9016	High	6.26	6.35	1.918	68.484	0.905	High	6.27	6.35	1.947	69.52	0.9105	High	6.27	6.35	1.933	69.038	0.8946	High	6.27	6.35	2.085	74.452	0.8995	High	6.27
E_D1165H+ FGFR	345	352	SSESSLEA	6.53	1	6	6.59	6.69	0.921	21.93	0.8446	Medium	6.6	6.7	0.933	22.213	0.8217	Medium	6.6	6.7	0.916	21.811	0.8353	Medium	6.59	6.69	2.381	56.691	0.8326	Medium	6.59	6.7	2.424	57.706	0.8171	Medium	6.6	6.7	2.407	57.308	0.8	Medium	6.6	6.7	2.714	64.621	0.8109	Medium	6.59
E_D1165H+ FGFR	357	363	LRMGCRC	6.3	2	5	6.12	6.43	0.034	0.968	0.9178	Medium	6.12	6.44	0.039	1.105	0.9247	Medium	6.12	6.44	0.052	1.473	0.9143	Medium	6.11	6.43	0.041	1.159	0.9218	Medium	6.12	6.44	0.039	1.103	0.9206	Medium	6.12	6.44	0.057	1.632	0.9185	Medium	6.12	6.44	0.069	1.98	0.9127	Medium	6.12
E_D1165H+ FGFR	367	375	DCWDGPDGM	11.64	1	6	11.52	11.7	0.517	12.311	0.891	Medium	11.51	11.69	0.49	11.657	0.8864	Medium	11.51	11.69	0.51	12.145	0.853	Medium	11.51	11.69	0.662	15.756	0.8841	Medium	11.51	11.69	0.627	14.933	0.8772	Medium	11.52	11.7	0.652	15.528	0.8876	Medium	11.52	11.7	1.063	25.3	0.8586	Medium	11.52
E_D1165H+ FGFR	367	386	DCWDGPDGMPVIYHGHTLTT	10.88	3	16	10.69	11.44	1.611	14.387	0.9196	High	10.69	11.43	1.626	14.514	0.9165	High	10.69	11.43	1.541	13.757	0.9111	High	10.69	11.43	2.377	21.22	0.9169	High	10.69	11.43	2.427	21.67	0.9155	High	10.7	11.44	2.387	21.309	0.9164	High	10.69	11.44	2.821	25.188	0.908	High	10.69
E_D1165H+ FGFR	367	394	DCWDGPDGMPVIYHGHTLTTKIKFSDVL	11.61	4	24	11.6	11.7	1.754	10.441	0.9146	High	11.6	11.69	1.741	10.363	0.9136	High	11.6	11.69	1.668	9.929	0.9135	High	11.6	11.69	2.897	17.244	0.8712	Medium	11.6	11.69	2.897	17.243	0.9106	High	11.6	11.7	2.966	17.654	0.8812	High	11.6	11.7	4.259	25.349	0.908	High	11.6
E_D1165H+ FGFR	367	396	DCWDGPDGMPVIYHGHTLTTKIKFSDVLHT	10.9	5	26	10.82	11.18	1.665	9.149	0.9024	High	10.82	11.17	1.62	8.902	0.8901	High	10.82	11.17	1.619	8.894	0.9011	High	10.82	11.17	2.748	15.101	0.8847	High	10.82	11.17	2.701	14.841	0.8859	High	10.82	11.17	2.771	15.223	0.8972	High	10.81	11.17	4.097	22.509	0.8741	Medium	10.82
E_D1165H+ FGFR	376	386	PVIYHGHTLTT	7.16	3	9	7.21	7.36	1.469	23.312	0.8312	Medium	7.21	7.36	1.468	23.295	0.8388	Medium	7.21	7.36	1.451	23.036	0.8228	Medium	7.2	7.35	2.127	33.76	0.848	Medium	7.21	7.36	2.151	34.14	0.8374	Medium	7.21	7.36	2.155	34.201	0.8457	Medium	7.21	7.36	2.129	33.79	0.8277	Medium	7.21
E_D1165H+ FGFR	387	394	KIKFSDVL	9.87	1	6	9.76	10.07	0.399	9.511	0.891	Medium	9.76	10.07	0.365	8.694	0.9287	High	9.76	10.07	0.337	8.018	0.9419	High	9.76	10.07	0.739	17.602	0.9271	High	9.76	10.07	0.725	17.272	0.9219	High	9.76	10.07	0.722	17.179	0.9281	High	9.76	10.08	1.248	29.718	0.9178	Medium	9.76
E_D1165H+ FGFR	387	399	KIKFSDVLHTIKE	9.3	3	11	9.2	9.3	0.271	3.514	0.8648	Medium	9.2	9.3	0.258	3.351	0.8662	Medium	9.2	9.3	0.28	3.64	0.8699	Medium	9.19	9.29	0.485	6.298	0.8196	Medium	9.2	9.3	0.471	6.113	0.8146	Medium	9.2	9.3	0.52	6.758	0.8135	Medium	9.19	9.29	0.879	11.42	0.8003	Medium	9.2
E_D1165H+ FGFR	391	399	SDVLHTIKE	7.38	3	7	7.24	7.33	0.034	0.697	0.8955	High	7.24	7.33	0.061	1.245	0.9159	High	7.24	7.33	0.081	1.661	0.9175	High	7.24	7.33	0.058	1.18	0.9092	High	7.24	7.33	0.077	1.571	0.891	High	7.24	7.34	0.067	1.367	0.9154	High	7.24	7.34	0.142	2.901	0.9249	High	7.24
E_D1165H+ FGFR	391	401	SDVLHTIKEHA	7.91	3	9	7.85	8.25	0.125	1.982	0.8619	Medium	7.85	8.25	0.119	1.889	0.8649	Medium	7.86	8.25	0.14	2.226	0.8612	Medium	7.85	8.24	0.135	2.144	0.8538	Medium	7.85	8.25	0.12	1.912	0.8537	Medium	7.86	8.25	0.134	2.135	0.8528	Medium	7.86	8.25	0.204	3.237	0.8529	Medium	7.85
E_D1165H+ FGFR	400	407	HAFVASEY	8.18	1	6	8.04	8.4	0.181	4.319	0.8785	Medium	8.04	8.4	0.181	4.312	0.872	Medium	8.04	8.4	0.169	4.033	0.8744	Medium	8.03	8.4	0.76	18.099	0.8525	Medium	8.04	8.4	0.784	18.667	0.8375	Medium	8.04	8.4	0.793	18.881	0.8426	Medium	8.04	8.4	1.711	40.74	0.848	Medium	8.04
E_D1165H+ FGFR	400	411	HAFVASEYPVIL	11.91	2	9	11.75	12.13	0.151	2.403	0.8076	Medium	11.74	12.13	0.185	2.937	0.8174	Medium	11.74	12.13	0.165	2.613	0.8203	Medium	11.74	12.13	0.664	10.54	0.8312	Medium	11.74	12.13	0.628	9.976	0.8001	Medium	11.75	12.13	0.618	9.809	0.8134	Medium	11.75	12.13	1.266	20.093	0.8387	Medium	11.75
E_D1165H+ FGFR	402	406	FVASE	6.03	1	3	5.96	6.27	0.234	11.122	0.8266	Medium	5.97	6.27	0.252	11.987	0.8321	Medium	5.97	6.27	0.25	11.916	0.7909	Medium	5.97	6.26	0.779	37.107	0.8315	Medium	5.97	6.27	0.843	40.133	0.818	Medium	5.97	6.27	0.869	41.358	0.8049	Medium	5.97	6.27	1.529	72.817	0.8505	Medium	5.96
E_D1165H+ FGFR	407	411	YPVIL	12.15	1	3	11.78	12.3	0.014	0.662	0.8987	Medium	11.77	12.3	0.003	0.164	0.8998	Medium	11.77	12.29	0.019	0.89	0.8999	Medium	11.77	12.29	0.012	0.568	0.9018	Medium	11.77	12.3	0.002	0.075	0.8975	Medium	11.78	12.3	0.038	1.829	0.8627	Medium	11.78	12.3	0.005	0.254	0.8906	Medium	11.78
E_D1165H+ FGFR	412	437	SIEDHCSIAQQRNMAQHFRKVLGDTL	10.39	4	24	10.32	10.84	1.291	7.683	0.9177	High	10.32	10.84	1.317	7.838	0.9132	High	10.32	10.84	1.28	7.617	0.9107	High	10.32	10.84	1.934	11.515	0.9126	High	10.32	10.84	1.918	11.416	0.9142	High	10.33	10.85	1.914	11.393	0.9106	High	10.33	10.84	3.233	19.242	0.9148	High	10.32
E_D1165H+ FGFR	428	437	HFRKVLGDTL	7.8	3	8	7.89	7.95	0.208	3.72	0.888	Medium	7.89	7.96	0.236	4.207	0.8828	Medium	7.89	7.96	0.208	3.711	0.8959	Medium	7.89	7.95	0.692	12.358	0.8368	Medium	7.89	7.95	0.641	11.45	0.8873	Medium	7.89	7.96	0.607	10.832	0.9031	Medium	7.89	7.96	1.242	22.184	0.8048	Medium	7.89
E_D1165H+ FGFR	438	443	LTKPVD	4.58	1	3	4.6	4.87	0.598	28.486	0.8911	Medium	4.61	4.87	0.576	27.442	0.9156	Medium	4.61	4.87	0.567	26.986	0.9227	Medium	4.61	4.87	1.128	53.696	0.9192	Medium	4.61	4.87	1.145	54.536	0.8932	Medium	4.61	4.87	1.134	53.979	0.9149	Medium	4.61	4.87	1.653	78.708	0.9166	Medium	4.6
E_D1165H+ FGFR	438	446	LTKPVDIAA	7.34	1	6	7.27	7.66	2.009	47.845	0.9282	High	7.28	7.66	1.975	47.018	0.927	High	7.28	7.66	1.953	46.498	0.9319	High	7.27	7.66	2.489	59.263	0.9278	Medium	7.27	7.66	2.484	59.141	0.9237	Medium	7.28	7.66	2.496	59.419	0.9281	Medium	7.28	7.66	3.02	71.9	0.9285	Medium	7.27
E_D1165H+ FGFR	438	455	LTKPVDIAADGLPSPNQL	10.67	3	13	10.49	10.69	2.236	24.576	0.9336	Medium	10.49	10.69	2.19	24.061	0.9347	Medium	10.49	10.69	2.166	23.799	0.9339	Medium	10.49	10.69	2.795	30.714	0.9174	Medium	10.49	10.69	2.753	30.258	0.916	Medium	10.49	10.7	2.767	30.406	0.9057	Medium	10.5	10.69	3.701	40.673	0.926	Medium	10.49
E_D1165H+ FGFR	438	471	LTKPVDIAADGLPSPNQLKRKILIKHKKLAEGSA	8.17	5	29	7.81	8.64	3.833	18.88	0.9463	High	7.81	8.64	3.751	18.478	0.9477	High	7.81	8.64	3.702	18.239	0.9499	High	7.82	8.65	4.676	23.033	0.9387	Medium	7.81	8.64	4.67	23.003	0.934	Medium	7.82	8.65	4.646	22.889	0.9311	Medium	7.82	8.64	5.831	28.723	0.9336	Medium	7.81
E_D1165H+ FGFR	438	472	LTKPVDIAADGLPSPNQLKRKILIKHKKLAEGSAY	8.72	5	30	8.53	8.6	4.266	20.316	0.9083	High	8.53	8.6	4.212	20.058	0.9154	High	8.53	8.6	4.105	19.546	0.9173	High	8.54	8.61	5.085	24.215	0.8904	High	8.53	8.6	5.132	24.439	0.8986	High	8.54	8.61	5.069	24.136	0.8967	High	8.53	8.6	6.211	29.574	0.8973	High	8.53
E_D1165H+ FGFR	444	455	IAADGLPSPNQL	10.42	1	8	10.61	10.76	0.797	14.24	0.8872	High	10.61	10.77	0.802	14.329	0.8646	Medium	10.61	10.77	0.772	13.792	0.8613	Medium	10.61	10.76	0.992	17.708	0.8702	Medium	10.61	10.77	0.971	17.335	0.8617	Medium	10.61	10.77	1.013	18.085	0.8558	Medium	10.61	10.76	1.371	24.487	0.8636	Medium	10.61
E_D1165H+ FGFR	447	455	DGLPSPNQL	10.11	1	5	9.93	10.4	0.044	1.248	0.8935	High	9.93	10.41	0.066	1.888	0.9002	High	9.93	10.41	0.061	1.754	0.8923	High	9.92	10.4	0.071	2.02	0.8976	High	9.93	10.41	0.079	2.256	0.9012	High	9.93	10.41	0.087	2.478	0.893	High	9.93	10.41	0.153	4.37	0.8995	High	9.93
E_D1165H+ FGFR	447	471	DGLPSPNQLKRKILIKHKKLAEGSA	7.22	4	21	7.24	7.71	1.987	13.52	0.9032	Medium	7.24	7.71	1.934	13.159	0.9023	Medium	7.24	7.71	1.932	13.142	0.8815	Medium	7.24	7.71	2.318	15.77	0.909	Medium	7.24	7.71	2.335	15.882	0.9092	Medium	7.24	7.71	2.318	15.768	0.9004	Medium	7.24	7.72	2.612	17.767	0.9323	High	7.24
E_D1165H+ FGFR	456	471	KRKILIKHKKLAEGSA	3.66	4	14	3.66	4.14	2.321	23.681	0.9674	High	3.66	4.14	2.28	23.269	0.9557	High	3.66	4.14	2.269	23.157	0.9628	High	3.66	4.14	2.773	28.297	0.9675	High	3.66	4.14	2.663	27.173	0.9645	High	3.66	4.14	2.686	27.407	0.9681	High	3.66	4.14	2.901	29.601	0.9694	High	3.66
E_D1165H+ FGFR	456	472	KRKILIKHKKLAEGSAY	4.25	4	15	4.34	4.42	2.788	26.55	0.9555	Medium	4.35	4.42	2.751	26.201	0.943	Medium	4.35	4.42	2.717	25.879	0.9505	Medium	4.35	4.42	3.215	30.62	0.9489	High	4.34	4.42	3.115	29.665	0.953	Medium	4.35	4.42	3.163	30.125	0.9441	Medium	4.35	4.42	3.318	31.6	0.9461	High	4.34
E_D1165H+ FGFR	472	480	YEEVPTSVM	9.79	1	6	9.64	10.43	3.183	75.796	0.9074	High	9.64	10.43	3.13	74.532	0.9109	High	9.64	10.43	3.086	73.466	0.9131	High	9.64	10.43	3.436	81.816	0.9053	High	9.64	10.43	3.479	82.822	0.8946	High	9.65	10.44	3.468	82.57	0.9028	High	9.64	10.44	3.461	82.394	0.9042	High	9.64
E_D1165H+ FGFR	473	480	EEVPTSVM	9.08	1	5	8.85	9.44	2.827	80.779	0.7934	Medium	8.85	9.44	2.79	79.717	0.7888	Medium	8.85	9.44	2.77	79.149	0.7963	Medium	8.86	9.44	3.126	89.319	0.7883	Medium	8.85	9.44	3.109	88.838	0.7897	Medium	8.86	9.44	3.122	89.209	0.7738	Medium	8.85	9.44	3.181	90.897	0.7811	Medium	8.85
E_D1165H+ FGFR	481	488	YSENDISN	6.21	1	6	6.11	6.39	2.818	67.09	0.8647	Medium	6.11	6.39	2.767	65.888	0.8547	Medium	6.11	6.39	2.704	64.391	0.8384	Medium	6.1	6.39	2.98	70.943	0.8536	Medium	6.11	6.39	3.046	72.525	0.8372	Medium	6.11	6.4	3.051	72.642	0.8443	Medium	6.11	6.4	3.016	71.798	0.8408	Medium	6.11
E_D1165H+ FGFR	481	495	YSENDISNSIKNGIL	11.41	2	13	11.27	11.77	2.518	27.674	0.9053	High	11.26	11.77	2.514	27.628	0.9009	High	11.26	11.77	2.43	26.702	0.8959	High	11.27	11.76	3.449	37.906	0.8816	High	11.26	11.76	3.486	38.307	0.9024	High	11.27	11.77	3.471	38.138	0.9013	High	11.27	11.77	4.328	47.563	0.8946	High	11.27
E_D1165H+ FGFR	481	496	YSENDISNSIKNGILY	11.53	2	14	11.46	11.59	2.461	25.112	0.9136	Medium	11.46	11.58	2.473	25.23	0.9098	Medium	11.46	11.58	2.411	24.602	0.8878	Medium	11.45	11.58	3.492	35.628	0.8994	Medium	11.45	11.58	3.618	36.917	0.8493	Medium	11.46	11.59	3.545	36.172	0.8849	Medium	11.46	11.59	4.395	44.849	0.8955	Medium	11.46
E_D1165H+ FGFR	481	509	YSENDISNSIKNGILYLEDPVNHEWYPHY	13.81	4	25	13.74	13.84	2.212	12.642	0.9419	High	13.74	13.84	2.222	12.698	0.9428	High	13.74	13.84	2.172	12.411	0.9377	High	13.75	13.85	3.421	19.547	0.9364	High	13.75	13.85	3.36	19.198	0.9355	High	13.74	13.84	3.379	19.31	0.9315	High	13.74	13.85	5.13	29.316	0.9206	High	13.74
E_D1165H+ FGFR	489	495	SIKNGIL	8.77	2	5	8.61	8.95	0.109	3.109	0.9267	High	8.61	8.95	0.102	2.91	0.9551	High	8.61	8.95	0.118	3.375	0.914	High	8.61	8.95	0.444	12.683	0.9536	Medium	8.61	8.95	0.43	12.298	0.9544	Medium	8.61	8.96	0.424	12.117	0.955	Medium	8.61	8.95	0.883	25.232	0.9459	Medium	8.61
E_D1165H+ FGFR	496	509	YLEDPVNHEWYPHY	10.77	2	10	10.48	11.28	0.067	0.957	0.9222	Medium	10.48	11.27	0.049	0.7	0.9201	Medium	10.48	11.27	0.055	0.784	0.9134	Medium	10.48	11.27	0.193	2.756	0.9208	Medium	10.48	11.27	0.189	2.705	0.929	Medium	10.49	11.28	0.193	2.761	0.9241	Medium	10.49	11.28	0.931	13.294	0.9254	Medium	10.48
E_D1165H+ FGFR	497	509	LEDPVNHEWYPHY	10.4	3	9	10.45	10.5	0.133	2.107	0.8647	Medium	10.45	10.5	0.138	2.193	0.8692	Medium	10.45	10.5	0.11	1.752	0.8672	Medium	10.45	10.5	0.275	4.364	0.8929	High	10.45	10.5	0.245	3.886	0.8587	High	10.45	10.5	0.263	4.177	0.8707	High	10.45	10.5	1.093	17.352	0.8819	High	10.45
E_D1165H+ FGFR	510	519	FVLTSSKIYY	10.93	2	8	10.79	11.18	0.31	5.532	0.7911	Medium	10.79	11.18	0.331	5.907	0.7905	Medium	10.79	11.18	0.297	5.296	0.799	Medium	10.79	11.18	0.953	17.01	0.7713	Medium	10.79	11.18	0.896	15.998	0.7603	Medium	10.8	11.18	0.965	17.228	0.7748	Medium	10.79	11.18	1.134	20.245	0.7936	Medium	10.79
E_D1165H+ FGFR	510	522	FVLTSSKIYYSEE	10.17	2	11	10.07	10.41	0.82	10.65	0.902	High	10.07	10.42	0.782	10.161	0.9018	High	10.07	10.41	0.771	10.013	0.8828	High	10.07	10.41	1.815	23.574	0.905	High	10.07	10.41	1.808	23.482	0.9068	High	10.07	10.42	1.814	23.553	0.9	High	10.08	10.42	2.127	27.623	0.8996	High	10.07
E_D1165H+ FGFR	523	530	TSSDQGNE	3.19	1	6	3.33	3.5	2.278	54.229	0.8734	Medium	3.33	3.51	2.321	55.259	0.8992	Medium	3.33	3.51	2.358	56.139	0.8927	Medium	3.33	3.51	2.421	57.646	0.8653	Medium	3.33	3.5	2.426	57.758	0.8817	Medium	3.33	3.51	2.372	56.468	0.8528	Medium	3.33	3.51	2.306	54.914	0.9051	Medium	3.33
E_D1165H+ FGFR	523	531	TSSDQGNED	3.46	1	7	3.45	3.58	2.647	54.011	0.8339	Medium	3.46	3.58	2.615	53.374	0.8548	Medium	3.45	3.58	2.685	54.799	0.8685	Medium	3.46	3.58	2.721	55.537	0.8637	Medium	3.45	3.58	2.708	55.267	0.8651	Medium	3.46	3.58	2.702	55.139	0.8403	Medium	3.46	3.58	2.66	54.283	0.8696	Medium	3.45
E_D1165H+ FGFR	545	566	HSSEKWFHGKLGAGRDGRHIAE	6.25	5	20	6.13	6.26	1.748	12.483	0.9163	High	6.13	6.26	1.672	11.943	0.9158	High	6.13	6.26	1.67	11.932	0.9175	High	6.13	6.25	2.676	19.111	0.9095	High	6.13	6.26	2.718	19.414	0.9092	High	6.14	6.26	2.688	19.201	0.9132	High	6.14	6.26	4.165	29.752	0.9214	High	6.13
E_D1165H+ FGFR	545	568	HSSEKWFHGKLGAGRDGRHIAERL	6.89	5	22	6.8	7.31	1.239	8.043	0.9038	High	6.8	7.31	1.193	7.745	0.8992	High	6.8	7.31	1.147	7.451	0.895	High	6.79	7.3	1.996	12.964	0.8938	High	6.8	7.31	2.032	13.197	0.8953	High	6.8	7.31	2.056	13.348	0.8943	High	6.8	7.31	3.624	23.531	0.8929	High	6.8
E_D1165H+ FGFR	572	583	YCIETGAPDGSF	10.72	1	9	10.57	11.26	0.317	5.037	0.9116	High	10.57	11.25	0.336	5.334	0.9213	High	10.57	11.25	0.335	5.315	0.9208	High	10.57	11.25	1.28	20.322	0.9124	High	10.57	11.25	1.239	19.67	0.9148	High	10.58	11.26	1.218	19.338	0.9073	High	10.58	11.26	2.242	35.594	0.9127	High	10.57
E_D1165H+ FGFR	573	583	CIETGAPDGSF	9.62	1	8	9.41	9.93	0.382	6.826	0.8622	Medium	9.41	9.94	0.358	6.385	0.8601	Medium	9.41	9.94	0.357	6.383	0.8621	Medium	9.4	9.93	1.296	23.142	0.8695	Medium	9.41	9.94	1.313	23.44	0.8602	Medium	9.41	9.94	1.3	23.209	0.8529	Medium	9.4	9.94	2.251	40.201	0.868	Medium	9.41
E_D1165H+ FGFR	573	584	CIETGAPDGSFL	11.73	1	9	11.55	11.94	0.413	6.555	0.8736	Medium	11.55	11.93	0.442	7.014	0.875	Medium	11.55	11.93	0.382	6.057	0.8753	Medium	11.55	11.93	1.264	20.069	0.8625	Medium	11.55	11.93	1.286	20.419	0.8674	Medium	11.55	11.94	1.263	20.044	0.8689	Medium	11.55	11.94	1.974	31.328	0.8748	Medium	11.55
E_D1165H+ FGFR	574	583	IETGAPDGSF	9.08	1	7	8.98	9.41	0.397	8.102	0.8435	Medium	8.98	9.41	0.369	7.535	0.8563	Medium	8.98	9.41	0.367	7.495	0.8487	Medium	8.98	9.4	1.18	24.074	0.8536	Medium	8.98	9.41	1.156	23.6	0.8439	Medium	8.98	9.41	1.181	24.104	0.8349	Medium	8.98	9.4	1.74	35.504	0.8522	Medium	8.98
E_D1165H+ FGFR	584	590	LVRESET	4.35	2	5	4.29	4.77	0.191	5.466	0.8864	High	4.29	4.77	0.193	5.522	0.8872	High	4.29	4.77	0.141	4.018	0.878	High	4.29	4.77	0.55	15.721	0.8922	High	4.29	4.77	0.547	15.619	0.8898	High	4.29	4.77	0.549	15.675	0.8978	High	4.29	4.77	1.519	43.404	0.9287	High	4.29
E_D1165H+ FGFR	595	599	YTLSF	12.25	1	3	12.03	12.44	0.023	1.093	0.8179	Medium	12.03	12.44	0.025	1.167	0.8129	Medium	12.03	12.44	0.031	1.488	0.8055	Medium	12.02	12.44	0.018	0.837	0.8374	Medium	12.02	12.44	0.006	0.268	0.8284	Medium	12.03	12.44	0.02	0.954	0.8102	Medium	12.03	12.44	0.033	1.588	0.8409	Medium	12.03
E_D1165H+ FGFR	600	621	WRNGKVQHCRIHSRQDAGTPKF	5.45	5	19	5.36	6.45	1.439	10.821	0.9285	High	5.36	6.45	1.408	10.59	0.926	High	5.36	6.45	1.387	10.425	0.9184	High	5.36	6.45	1.724	12.961	0.9241	High	5.36	6.45	1.676	12.598	0.922	High	5.36	6.45	1.733	13.033	0.9276	High	5.36	6.46	2.157	16.222	0.925	High	5.36
E_D1165H+ FGFR	622	627	FLTDNL	10.94	1	4	10.79	11.16	0.49	17.509	0.8985	Medium	10.79	11.15	0.477	17.049	0.8989	Medium	10.79	11.15	0.442	15.794	0.8949	Medium	10.79	11.15	0.838	29.924	0.8901	Medium	10.79	11.15	0.814	29.078	0.8843	Medium	10.8	11.16	0.83	29.642	0.8884	Medium	10.79	11.15	1.617	57.733	0.8763	Medium	10.79
E_D1165H+ FGFR	622	629	FLTDNLVF	14.01	1	6	13.84	14.2	0.303	7.214	0.9014	Medium	13.83	14.19	0.31	7.385	0.8993	Medium	13.83	14.2	0.285	6.792	0.8979	Medium	13.84	14.2	0.611	14.558	0.8978	Medium	13.84	14.2	0.559	13.3	0.8959	Medium	13.84	14.2	0.616	14.674	0.909	Medium	13.84	14.2	1.44	34.293	0.9084	Medium	13.84
E_D1165H+ FGFR	628	632	VFDSL	10.45	1	3	10.44	10.7	0.254	12.101	0.8603	Medium	10.44	10.7	0.241	11.484	0.8503	Medium	10.44	10.7	0.229	10.921	0.85	Medium	10.44	10.7	0.845	40.259	0.8614	Medium	10.44	10.7	0.862	41.034	0.8311	Medium	10.44	10.7	0.858	40.841	0.842	Medium	10.45	10.7	0.901	42.912	0.8378	Medium	10.44
E_D1165H+ FGFR	633	637	YDLIT	9.85	1	3	9.73	10.13	0.011	0.542	0.8504	Medium	9.73	10.13	0.014	0.644	0.852	Medium	9.74	10.13	0.059	2.805	0.8399	Medium	9.73	10.13	0.017	0.812	0.8246	Medium	9.73	10.13	0.013	0.639	0.8306	Medium	9.74	10.13	0.015	0.738	0.8312	Medium	9.74	10.13	0.016	0.753	0.8219	Medium	9.73
E_D1165H+ FGFR	633	646	YDLITHYQQVPLRC	10.28	3	11	10.22	10.39	0.203	2.638	0.9129	High	10.22	10.39	0.222	2.88	0.9071	High	10.22	10.39	0.194	2.524	0.9062	High	10.22	10.39	0.783	10.166	0.9134	High	10.22	10.39	0.784	10.176	0.9105	High	10.23	10.39	0.791	10.269	0.9057	High	10.23	10.39	1.445	18.768	0.9196	High	10.22
E_D1165H+ FGFR	633	648	YDLITHYQQVPLRCNE	9.85	3	13	9.74	9.84	0.706	7.763	0.9281	High	9.74	9.84	0.689	7.576	0.9056	High	9.74	9.84	0.666	7.323	0.9207	High	9.74	9.84	1.222	13.424	0.9121	High	9.74	9.84	1.227	13.488	0.9174	High	9.75	9.85	1.228	13.489	0.9171	High	9.75	9.84	1.804	19.82	0.9049	High	9.74
E_D1165H+ FGFR	636	646	ITHYQQVPLRC	7.78	2	8	7.68	7.89	0.267	4.767	0.9006	High	7.68	7.89	0.235	4.197	0.9242	High	7.68	7.89	0.198	3.542	0.8983	High	7.67	7.89	0.851	15.199	0.9073	High	7.68	7.89	0.851	15.195	0.9113	High	7.68	7.89	0.856	15.28	0.884	High	7.68	7.89	1.504	26.853	0.8946	High	7.68
E_D1165H+ FGFR	638	648	HYQQVPLRCNE	6.79	3	8	6.84	6.91	0.83	14.82	0.8516	Medium	6.84	6.91	0.796	14.212	0.8779	Medium	6.84	6.91	0.748	13.363	0.8711	Medium	6.83	6.91	1.364	24.361	0.8498	Medium	6.84	6.91	1.36	24.291	0.8697	Medium	6.84	6.92	1.347	24.047	0.888	Medium	6.84	6.92	1.926	34.401	0.8724	Medium	6.84
E_D1165H+ FGFR	640	648	QQVPLRCNE	6.68	2	6	6.58	6.8	1.032	24.582	0.9162	Medium	6.58	6.81	0.994	23.667	0.9098	Medium	6.58	6.81	0.985	23.451	0.9118	Medium	6.57	6.8	1.647	39.202	0.9113	Medium	6.58	6.8	1.662	39.569	0.9097	Medium	6.58	6.81	1.655	39.402	0.9098	Medium	6.58	6.81	2.166	51.56	0.9147	Medium	6.58
E_D1165H+ FGFR	649	662	FEMRLSEPVPQTNA	9.69	2	10	9.73	9.78	1.517	21.672	0.9204	High	9.73	9.79	1.488	21.256	0.9182	High	9.74	9.79	1.452	20.737	0.9181	High	9.73	9.78	2.442	34.886	0.9197	High	9.73	9.78	2.439	34.849	0.919	High	9.74	9.79	2.457	35.096	0.9249	High	9.74	9.79	3.241	46.302	0.934	High	9.73
E_D1165H+ FGFR	649	667	FEMRLSEPVPQTNAHESKE	8.33	4	15	8.18	8.76	1.682	16.024	0.8711	High	8.18	8.76	1.637	15.588	0.8702	Medium	8.18	8.76	1.594	15.179	0.8732	Medium	8.19	8.77	2.712	25.829	0.8678	Medium	8.18	8.76	2.733	26.033	0.874	Medium	8.19	8.76	2.689	25.609	0.8737	Medium	8.19	8.76	3.582	34.116	0.8695	Medium	8.18
E_D1165H+ FGFR	650	662	EMRLSEPVPQTNA	8.18	2	9	8.11	8.18	1.653	26.236	0.8194	Medium	8.11	8.18	1.63	25.87	0.8143	Medium	8.12	8.18	1.569	24.911	0.8423	Medium	8.12	8.19	2.519	39.992	0.7646	Medium	8.11	8.18	2.514	39.897	0.7988	Medium	8.12	8.19	2.499	39.665	0.8073	Medium	8.12	8.19	3.148	49.961	0.7555	Medium	8.11
E_D1165H+ FGFR	650	667	EMRLSEPVPQTNAHESKE	6.68	4	14	6.58	7.08	1.984	20.242	0.913	High	6.58	7.08	1.948	19.881	0.9121	High	6.58	7.08	1.906	19.453	0.8867	High	6.57	7.08	3.103	31.661	0.8841	High	6.58	7.08	3.114	31.776	0.8863	High	6.58	7.08	3.13	31.942	0.8951	High	6.58	7.09	3.89	39.69	0.8743	Medium	6.58
E_D1165H+ FGFR	651	662	MRLSEPVPQTNA	7.8	2	8	7.68	7.77	1.666	29.747	0.8648	Medium	7.68	7.77	1.667	29.774	0.836	Medium	7.68	7.77	1.59	28.385	0.8468	Medium	7.67	7.77	2.267	40.482	0.8424	Medium	7.68	7.77	2.254	40.242	0.8648	Medium	7.68	7.77	2.249	40.155	0.8528	Medium	7.68	7.77	2.886	51.542	0.8698	Medium	7.68
E_D1165H+ FGFR	651	667	MRLSEPVPQTNAHESKE	6.4	4	13	6.21	6.63	1.908	20.966	0.9114	Medium	6.21	6.63	1.86	20.444	0.9205	Medium	6.21	6.63	1.845	20.271	0.9165	Medium	6.2	6.62	2.736	30.069	0.8918	Medium	6.21	6.63	2.749	30.213	0.8978	Medium	6.21	6.63	2.73	30	0.8988	Medium	6.21	6.63	3.5	38.457	0.8854	Medium	6.21
E_D1165H+ FGFR	668	682	WYHASLTRAQAEHML	9.41	3	13	9.54	9.66	0.763	8.381	0.8301	Medium	9.54	9.66	0.753	8.276	0.8196	Medium	9.54	9.66	0.751	8.251	0.8163	Medium	9.54	9.66	1.646	18.084	0.7966	Medium	9.54	9.66	1.687	18.535	0.7957	Medium	9.55	9.66	1.719	18.895	0.8107	Medium	9.54	9.66	2.354	25.873	0.8034	Medium	9.54
E_D1165H+ FGFR	674	682	TRAQAEHML	6.79	2	7	6.69	7.12	0.194	3.952	0.8676	Medium	6.69	7.12	0.18	3.675	0.8699	Medium	6.69	7.12	0.185	3.772	0.8668	Medium	6.68	7.12	0.495	10.097	0.862	Medium	6.69	7.12	0.482	9.844	0.8722	Medium	6.69	7.13	0.485	9.895	0.8702	Medium	6.69	7.13	0.672	13.719	0.8033	Medium	6.69
E_D1165H+ FGFR	683	691	MRVPRDGAF	8.07	2	6	7.99	8.3	0.148	3.523	0.9044	Medium	7.99	8.3	0.138	3.292	0.9008	Medium	7.99	8.3	0.148	3.518	0.8962	Medium	7.99	8.3	0.311	7.415	0.9003	Medium	7.99	8.3	0.301	7.171	0.9051	Medium	7.99	8.3	0.296	7.04	0.9022	Medium	7.99	8.3	0.467	11.112	0.9049	Medium	7.99
E_D1165H+ FGFR	692	701	LVRKRNEPNS	3.34	3	7	3.26	3.75	1.603	32.717	0.9677	High	3.26	3.75	1.583	32.312	0.969	High	3.26	3.75	1.577	32.182	0.9672	High	3.26	3.75	2.436	49.724	0.9692	High	3.26	3.75	2.408	49.148	0.9695	High	3.26	3.75	2.371	48.395	0.9692	High	3.26	3.75	2.468	50.359	0.9655	High	3.26
E_D1165H+ FGFR	692	702	LVRKRNEPNSY	4.14	3	8	4.09	4.76	1.423	25.408	0.9519	High	4.09	4.77	1.391	24.848	0.9547	High	4.09	4.77	1.361	24.31	0.9461	High	4.09	4.77	2.146	38.32	0.9551	High	4.09	4.76	2.051	36.622	0.9566	High	4.09	4.77	2.091	37.333	0.9526	High	4.09	4.77	2.191	39.119	0.951	High	4.09
E_D1165H+ FGFR	693	702	VRKRNEPNSY	3.93	3	7	3.87	4.34	1.426	29.108	0.9446	High	3.87	4.34	1.424	29.068	0.9549	High	3.88	4.34	1.39	28.362	0.9505	High	3.88	4.34	2.17	44.277	0.9323	High	3.87	4.34	2.113	43.123	0.9262	High	3.88	4.34	2.127	43.408	0.9388	High	3.88	4.34	2.208	45.068	0.9276	High	3.87
E_D1165H+ FGFR	707	725	RAEGKIKHCRVQQEGQTVM	5.03	4	17	4.96	5.7	1.258	10.572	0.9315	High	4.96	5.7	1.242	10.433	0.9316	High	4.96	5.7	1.241	10.427	0.9219	High	4.96	5.7	1.82	15.292	0.9279	High	4.96	5.7	1.76	14.793	0.9327	High	4.96	5.7	1.771	14.88	0.9305	High	4.96	5.7	3.231	27.154	0.9292	High	4.96
E_D1165H+ FGFR	723	731	TVMLGNSEF	11.22	1	7	11.17	11.31	0.839	17.119	0.7972	Medium	11.16	11.3	0.852	17.388	0.7746	Medium	11.16	11.3	0.781	15.935	0.7852	Medium	11.16	11.3	1.047	21.372	0.7848	Medium	11.16	11.3	1.038	21.188	0.7799	Medium	11.17	11.31	1.056	21.547	0.7836	Medium	11.16	11.31	1.524	31.097	0.7499	Medium	11.16
E_D1165H+ FGFR	741	758	YEKHPLYRKMKLRYPINE	7.32	3	14	7.59	7.69	0.853	8.707	0.8678	Medium	7.59	7.7	0.813	8.296	0.8942	Medium	7.59	7.7	0.815	8.315	0.876	Medium	7.59	7.69	1.415	14.435	0.8852	Medium	7.59	7.69	1.417	14.458	0.8871	Medium	7.6	7.7	1.418	14.47	0.8876	Medium	7.6	7.7	1.949	19.885	0.8856	Medium	7.59
E_D1165H+ FGFR	741	760	YEKHPLYRKMKLRYPINEEA	7.42	3	16	7.29	7.53	0.8	7.142	0.9099	High	7.29	7.54	0.766	6.843	0.9087	High	7.29	7.54	0.788	7.033	0.8971	High	7.29	7.53	1.745	15.582	0.897	High	7.29	7.53	1.735	15.487	0.9034	High	7.29	7.54	1.743	15.565	0.8937	High	7.3	7.54	2.655	23.705	0.9009	Medium	7.29
E_D1165H+ FGFR	747	758	YRKMKLRYPINE	7.16	4	9	7.21	7.34	0.733	11.629	0.9415	High	7.21	7.34	0.748	11.875	0.94	High	7.21	7.34	0.724	11.492	0.93	High	7.2	7.34	1.094	17.367	0.927	High	7.21	7.34	1.111	17.642	0.9399	High	7.21	7.34	1.115	17.704	0.9438	High	7.21	7.35	1.554	24.664	0.9328	High	7.21
E_D1165H+ FGFR	761	774	LEKIGTAEPDYGAL	9.85	2	11	9.71	10.31	3.375	43.825	0.8916	High	9.71	10.31	3.384	43.954	0.8927	High	9.71	10.31	3.224	41.873	0.8901	High	9.71	10.31	5.391	70.018	0.8973	Medium	9.71	10.31	5.472	71.066	0.8946	Medium	9.71	10.32	5.423	70.429	0.8906	Medium	9.71	10.32	5.559	72.192	0.9038	High	9.71
E_D1165H+ FGFR	762	774	EKIGTAEPDYGAL	9.35	2	10	9.21	9.97	3.204	45.765	0.8911	High	9.21	9.97	3.174	45.342	0.8923	High	9.21	9.97	2.994	42.776	0.8791	High	9.21	9.97	4.907	70.102	0.888	High	9.21	9.97	4.943	70.621	0.8867	High	9.22	9.97	4.917	70.236	0.8912	High	9.21	9.97	5.048	72.11	0.8885	High	9.21
E_D1165H+ FGFR	775	782	YEGRNPGF	7.69	1	5	7.55	8.02	2.496	71.312	0.9372	High	7.55	8.02	2.468	70.507	0.9151	High	7.55	8.02	2.428	69.367	0.935	High	7.55	8.02	2.538	72.527	0.9288	High	7.55	8.02	2.555	73	0.9247	High	7.55	8.03	2.543	72.671	0.9277	High	7.56	8.03	2.532	72.341	0.9297	High	7.55
E_D1165H+ FGFR	783	792	YVEANPMPTF	11.57	1	6	11.17	12.01	3.17	75.484	0.9293	High	11.16	12	3.145	74.87	0.9306	High	11.16	12	3.074	73.189	0.9306	High	11.16	12	3.383	80.557	0.9229	High	11.16	12	3.436	81.8	0.9244	High	11.17	12.01	3.403	81.029	0.9221	High	11.16	12.01	3.378	80.437	0.9288	High	11.16
E_D1165H+ FGFR	783	801	YVEANPMPTFKCAVKALFD	13.3	3	15	13.36	13.46	3.672	34.972	0.8195	Medium	13.35	13.45	3.68	35.046	0.8227	Medium	13.35	13.45	3.628	34.55	0.8191	Medium	13.35	13.46	4.353	41.458	0.8196	Medium	13.36	13.46	4.314	41.09	0.7996	Medium	13.36	13.46	4.351	41.441	0.7986	Medium	13.36	13.46	4.786	45.578	0.8195	Medium	13.36
E_D1165H+ FGFR	793	800	KCAVKALF	9.3	1	6	9.16	9.43	0.064	1.532	0.9015	Medium	9.16	9.43	0.056	1.34	0.9153	Medium	9.16	9.43	0.059	1.396	0.9191	Medium	9.16	9.43	0.194	4.611	0.9128	Medium	9.16	9.43	0.175	4.165	0.9068	Medium	9.17	9.44	0.172	4.094	0.916	Medium	9.16	9.43	0.395	9.414	0.9051	Medium	9.16
E_D1165H+ FGFR	793	801	KCAVKALFD	8.87	2	7	8.7	9.3	0.075	1.532	0.8776	Medium	8.7	9.3	0.085	1.74	0.8829	Medium	8.7	9.3	0.098	2.005	0.8806	Medium	8.71	9.29	0.246	5.02	0.8662	Medium	8.7	9.3	0.243	4.961	0.8684	Medium	8.71	9.3	0.229	4.666	0.8704	Medium	8.71	9.29	0.65	13.266	0.8631	Medium	8.7
E_D1165H+ FGFR	801	809	DYKAQREDE	4.2	2	7	4.18	4.56	0.759	15.483	0.9421	High	4.18	4.56	0.744	15.19	0.9283	High	4.18	4.56	0.718	14.645	0.9339	High	4.18	4.56	1.757	35.866	0.9295	High	4.18	4.56	1.727	35.237	0.9072	High	4.18	4.56	1.706	34.81	0.9195	High	4.18	4.56	2.713	55.37	0.9291	High	4.18
E_D1165H+ FGFR	801	810	DYKAQREDEL	7.06	2	8	6.92	7.32	0.727	12.974	0.902	High	6.92	7.33	0.718	12.813	0.9112	High	6.92	7.33	0.723	12.902	0.9141	High	6.92	7.32	1.59	28.399	0.9003	Medium	6.92	7.33	1.577	28.158	0.8962	Medium	6.92	7.33	1.578	28.182	0.8958	High	6.93	7.33	2.493	44.524	0.8351	Medium	6.92
E_D1165H+ FGFR	802	809	YKAQREDE	3.88	2	6	3.76	4.06	0.671	15.986	0.9061	Medium	3.76	4.06	0.662	15.764	0.945	Medium	3.76	4.06	0.651	15.512	0.9436	Medium	3.76	4.06	1.315	31.298	0.9266	Medium	3.76	4.06	1.265	30.124	0.9367	Medium	3.76	4.06	1.269	30.207	0.9346	Medium	3.76	4.06	1.994	47.474	0.9254	Medium	3.76
E_D1165H+ FGFR	802	810	YKAQREDEL	6.28	2	7	6.25	6.59	0.645	13.158	0.8968	Medium	6.25	6.6	0.62	12.651	0.9027	Medium	6.25	6.6	0.62	12.655	0.9023	Medium	6.25	6.59	1.101	22.467	0.8924	Medium	6.25	6.59	1.144	23.344	0.8996	Medium	6.25	6.6	1.155	23.562	0.8954	Medium	6.25	6.6	1.746	35.634	0.8867	Medium	6.25
E_D1165H+ FGFR	802	811	YKAQREDELT	5.62	2	8	5.6	6.04	0.625	11.164	0.9333	High	5.6	6.04	0.625	11.167	0.9218	High	5.6	6.04	0.641	11.444	0.8992	Medium	5.61	6.04	1.159	20.696	0.9002	High	5.6	6.04	1.144	20.436	0.9288	High	5.61	6.04	1.138	20.32	0.9289	High	5.61	6.04	1.868	33.349	0.9225	Medium	5.6
E_D1165H+ FGFR	810	819	LTFTKSAIIQ	9.41	2	8	9.31	9.55	0.076	1.356	0.9185	Medium	9.32	9.55	0.092	1.645	0.9402	Medium	9.32	9.55	0.079	1.408	0.9326	Medium	9.31	9.55	0.428	7.636	0.9272	Medium	9.31	9.55	0.402	7.17	0.9356	Medium	9.32	9.55	0.402	7.18	0.933	Medium	9.31	9.55	1.208	21.576	0.8896	Medium	9.31
E_D1165H+ FGFR	810	828	LTFTKSAIIQNVEKQDGGW	11	3	17	10.92	11.44	1.701	14.292	0.8951	High	10.93	11.44	1.68	14.121	0.8974	High	10.93	11.44	1.643	13.806	0.9073	High	10.92	11.44	2.669	22.425	0.8889	High	10.93	11.44	2.696	22.654	0.8992	High	10.93	11.44	2.683	22.542	0.8936	High	10.92	11.44	4.334	36.42	0.8947	High	10.92
E_D1165H+ FGFR	811	819	TFTKSAIIQ	7.81	1	7	7.74	8.02	0.065	1.323	0.9127	High	7.74	8.02	0.066	1.353	0.924	High	7.74	8.02	0.074	1.514	0.9417	High	7.73	8.02	0.377	7.685	0.9268	High	7.74	8.02	0.359	7.318	0.9392	High	7.74	8.03	0.372	7.597	0.9278	High	7.74	8.03	1.101	22.469	0.9178	High	7.74
E_D1165H+ FGFR	811	822	TFTKSAIIQNVE	8.74	2	10	8.75	8.82	0.105	1.497	0.8692	Medium	8.75	8.82	0.116	1.658	0.8782	Medium	8.75	8.82	0.136	1.944	0.8618	Medium	8.76	8.82	0.572	8.168	0.8698	Medium	8.75	8.82	0.621	8.867	0.8488	Medium	8.76	8.82	0.561	8.008	0.843	Medium	8.75	8.82	1.606	22.948	0.8255	Medium	8.75
E_D1165H+ FGFR	811	828	TFTKSAIIQNVEKQDGGW	10.4	3	16	10.29	10.81	1.717	15.329	0.9384	High	10.3	10.81	1.687	15.066	0.9393	High	10.3	10.81	1.655	14.774	0.934	High	10.29	10.81	2.667	23.814	0.9274	High	10.3	10.81	2.653	23.684	0.9282	High	10.3	10.81	2.666	23.801	0.9168	High	10.3	10.81	4.259	38.025	0.9329	High	10.3
E_D1165H+ FGFR	812	820	FTKSAIIQN	6.83	1	7	6.73	6.94	0.087	1.772	0.8685	Medium	6.73	6.94	0.069	1.404	0.8802	Medium	6.73	6.94	0.086	1.76	0.8864	Medium	6.72	6.93	0.515	10.518	0.867	Medium	6.73	6.94	0.44	8.97	0.8772	Medium	6.73	6.94	0.412	8.416	0.8688	Medium	6.73	6.94	1.235	25.207	0.8862	Medium	6.73
E_D1165H+ FGFR	812	828	FTKSAIIQNVEKQDGGW	10.17	3	15	10.07	10.61	1.713	16.31	0.927	High	10.07	10.62	1.681	16.007	0.9274	High	10.07	10.62	1.646	15.674	0.9255	High	10.07	10.61	2.628	25.03	0.9231	High	10.07	10.61	2.634	25.088	0.9261	High	10.07	10.62	2.619	24.946	0.9264	High	10.08	10.62	4.141	39.436	0.9231	High	10.07
E_D1165H+ FGFR	829	844	WRGDYGGKKQLWFPSN	9.74	3	13	9.71	10.18	1.008	11.08	0.906	High	9.71	10.18	1.012	11.117	0.9047	High	9.71	10.18	0.987	10.844	0.8934	High	9.71	10.18	1.386	15.228	0.8956	High	9.71	10.18	1.391	15.282	0.9031	High	9.71	10.18	1.384	15.212	0.9002	High	9.71	10.18	1.673	18.386	0.8884	High	9.71
E_D1165H+ FGFR	829	845	WRGDYGGKKQLWFPSNY	10.66	4	14	10.45	11.04	0.865	8.826	0.9504	High	10.46	11.04	0.849	8.668	0.9439	High	10.46	11.04	0.828	8.449	0.9502	High	10.45	11.04	1.206	12.309	0.9465	High	10.46	11.04	1.183	12.071	0.9488	High	10.46	11.05	1.188	12.121	0.9509	High	10.46	11.04	1.527	15.578	0.9356	High	10.45
E_D1165H+ FGFR	849	860	MINPAILEPERE	10.22	2	8	10.16	10.27	3.561	63.587	0.9313	High	10.16	10.27	3.576	63.855	0.9307	High	10.16	10.27	3.416	60.994	0.9342	High	10.16	10.27	4.77	85.176	0.9215	High	10.16	10.27	4.814	85.961	0.9202	High	10.17	10.28	4.805	85.807	0.9092	High	10.17	10.28	4.766	85.113	0.9302	High	10.16
E_D1165H+ FGFR	849	862	MINPAILEPEREHL	10.28	3	10	9.81	10.75	3.751	53.579	0.9315	High	9.81	10.75	3.73	53.285	0.9284	High	9.81	10.75	3.613	51.618	0.9167	High	9.81	10.75	4.896	69.945	0.9274	High	9.81	10.75	4.954	70.765	0.9271	High	9.81	10.75	4.908	70.107	0.9107	High	9.82	10.75	4.951	70.733	0.9255	High	9.81
E_D1165H+ FGFR	849	871	MINPAILEPEREHLDENSPLGDL	12.05	3	18	11.65	12.46	4.827	38.308	0.8985	High	11.65	12.45	4.839	38.406	0.9023	High	11.65	12.45	4.633	36.77	0.8872	High	11.65	12.45	7.043	55.897	0.8918	High	11.65	12.46	7.111	56.436	0.9005	High	11.65	12.46	7.116	56.476	0.8966	High	11.65	12.46	7.246	57.511	0.8948	High	11.65
E_D1165H+ FGFR	849	872	MINPAILEPEREHLDENSPLGDLL	13.09	3	19	13	13.11	4.538	34.121	0.9212	High	12.99	13.11	4.54	34.137	0.9215	High	12.99	13.11	4.358	32.769	0.9107	High	13	13.12	7.007	52.687	0.9236	High	13	13.12	7.043	52.954	0.9247	High	13	13.11	7.044	52.959	0.9212	High	13	13.12	7.454	56.046	0.897	High	13
E_D1165H+ FGFR	849	876	MINPAILEPEREHLDENSPLGDLLRGVL	14.06	4	23	13.68	14.25	3.985	24.752	0.9254	High	13.68	14.25	3.957	24.58	0.9233	High	13.68	14.26	3.79	23.543	0.9252	High	13.69	14.26	7.339	45.586	0.9241	High	13.69	14.26	7.28	45.22	0.9031	High	13.69	14.26	7.295	45.312	0.9204	High	13.69	14.26	8.585	53.321	0.9229	High	13.68
E_D1165H+ FGFR	856	871	EPEREHLDENSPLGDL	10.34	3	13	10.28	10.35	1.958	21.522	0.8772	Medium	10.28	10.35	1.997	21.944	0.8682	Medium	10.28	10.35	1.952	21.446	0.877	Medium	10.28	10.34	3.121	34.301	0.8869	Medium	10.28	10.35	3.166	34.797	0.8708	Medium	10.28	10.35	3.107	34.139	0.8755	Medium	10.29	10.35	3.388	37.23	0.8923	Medium	10.28
E_D1165H+ FGFR	856	876	EPEREHLDENSPLGDLLRGVL	13.81	3	18	13.76	13.92	1.463	11.608	0.9171	High	13.76	13.91	1.513	12.007	0.914	High	13.75	13.91	1.454	11.541	0.9168	High	13.76	13.92	3.911	31.038	0.887	High	13.76	13.92	3.866	30.683	0.8821	High	13.76	13.92	3.814	30.273	0.8897	High	13.76	13.92	4.997	39.66	0.9106	High	13.76
E_D1165H+ FGFR	861	872	HLDENSPLGDLL	12.73	2	9	12.6	12.72	1.191	18.906	0.8906	Medium	12.6	12.71	1.201	19.07	0.8857	Medium	12.6	12.71	1.135	18.014	0.8912	Medium	12.6	12.71	2.523	40.044	0.902	Medium	12.6	12.72	2.513	39.886	0.8983	Medium	12.6	12.72	2.511	39.862	0.8941	Medium	12.6	12.72	3.013	47.831	0.9095	Medium	12.6
E_D1165H+ FGFR	861	876	HLDENSPLGDLLRGVL	13.97	3	13	13.87	14.26	1.094	12.026	0.9555	High	13.86	14.26	1.131	12.426	0.9453	High	13.86	14.27	1.057	11.62	0.9406	High	13.86	14.27	3.486	38.308	0.936	High	13.87	14.27	3.442	37.819	0.9219	High	13.88	14.26	3.425	37.642	0.9231	High	13.86	14.27	4.672	51.34	0.959	High	13.86
E_D1165H+ FGFR	863	871	DENSPLGDL	11.52	1	6	11.3	11.77	1.016	24.197	0.8162	Medium	11.3	11.77	1.008	24.003	0.8136	Medium	11.3	11.77	0.982	23.37	0.802	Medium	11.29	11.76	2.123	50.543	0.8165	Medium	11.29	11.76	2.078	49.473	0.8099	Medium	11.3	11.77	2.111	50.257	0.7948	Medium	11.3	11.77	2.319	55.226	0.8162	Medium	11.3
E_D1165H+ FGFR	863	872	DENSPLGDLL	13.35	1	7	13.26	13.44	0.989	20.187	0.92	Medium	13.25	13.44	1.003	20.466	0.9216	Medium	13.25	13.44	0.966	19.712	0.9292	Medium	13.25	13.44	2.254	46.008	0.914	Medium	13.26	13.44	2.27	46.321	0.913	Medium	13.26	13.44	2.272	46.365	0.9125	Medium	13.26	13.44	2.746	56.04	0.9174	Medium	13.26
E_D1165H+ FGFR	863	876	DENSPLGDLLRGVL	14.32	2	11	14.13	14.49	0.988	12.831	0.888	Medium	14.12	14.49	0.949	12.319	0.8806	Medium	14.13	14.49	0.918	11.917	0.8768	Medium	14.13	14.49	3.258	42.308	0.8666	Medium	14.13	14.49	3.241	42.09	0.8534	Medium	14.13	14.49	3.184	41.355	0.8655	Medium	14.13	14.49	4.55	59.095	0.8884	Medium	14.13
E_D1165H+ FGFR	872	882	LRGVLDVPACQ	9.69	2	8	9.67	9.95	0.177	3.154	0.8496	Medium	9.67	9.95	0.246	4.389	0.8227	Medium	9.67	9.95	0.265	4.738	0.8027	Medium	9.66	9.95	0.833	14.871	0.8248	Medium	9.67	9.95	0.855	15.261	0.8168	Medium	9.67	9.96	0.837	14.945	0.8154	Medium	9.66	9.95	1.833	32.728	0.7901	Medium	9.67
E_D1165H+ FGFR	877	882	DVPACQ	5.3	1	3	5.1	5.66	0.054	2.573	0.9316	High	5.1	5.66	0.054	2.591	0.9303	High	5.1	5.66	0.074	3.508	0.9	Medium	5.1	5.67	0.196	9.31	0.9317	High	5.1	5.66	0.189	9.019	0.9349	High	5.1	5.67	0.19	9.03	0.9253	High	5.1	5.67	0.606	28.867	0.9334	High	5.1
E_D1165H+ FGFR	883	894	IAIRPEGKNNRL	6.19	3	9	5.97	6.52	2.365	37.546	0.9294	High	5.97	6.52	2.334	37.04	0.9247	High	5.97	6.52	2.287	36.3	0.9223	High	5.98	6.51	3.247	51.545	0.9205	High	5.97	6.52	3.265	51.827	0.9278	High	5.98	6.52	3.25	51.584	0.9238	High	5.98	6.52	3.781	60.012	0.9207	High	5.97
E_D1165H+ FGFR	883	896	IAIRPEGKNNRLFV	8.61	4	11	8.77	8.83	2.089	27.125	0.9186	High	8.77	8.84	2.063	26.789	0.9362	High	8.77	8.84	2.036	26.443	0.9241	High	8.77	8.84	3.043	39.514	0.9125	Medium	8.77	8.84	3.06	39.746	0.9261	High	8.77	8.84	3.039	39.461	0.9303	High	8.77	8.83	3.807	49.445	0.9103	Medium	8.77
E_D1165H+ FGFR	898	906	SISMPSVAQ	8.93	1	6	8.94	8.99	2.101	50.024	0.8476	Medium	8.94	9	2.105	50.11	0.8541	Medium	8.94	9	2.072	49.335	0.8406	Medium	8.93	9	2.567	61.13	0.8507	Medium	8.94	9	2.651	63.127	0.8447	Medium	8.94	9	2.562	60.999	0.8335	Medium	8.93	8.99	2.932	69.818	0.8483	Medium	8.94
E_D1165H+ FGFR	898	909	SISMPSVAQWSL	13.51	1	9	13.39	13.81	2.371	37.631	0.8857	Medium	13.39	13.81	2.35	37.306	0.8845	Medium	13.39	13.8	2.267	35.983	0.8966	Medium	13.39	13.81	3.536	56.127	0.8738	Medium	13.39	13.81	3.565	56.585	0.8515	Medium	13.39	13.81	3.523	55.929	0.8709	Medium	13.39	13.81	3.996	63.425	0.8898	Medium	13.39
E_D1165H+ FGFR	902	909	PSVAQWSL	12.36	1	6	12.12	12.56	1.888	44.946	0.8825	Medium	12.11	12.56	1.876	44.661	0.8698	Medium	12.11	12.55	1.807	43.034	0.8829	Medium	12.11	12.55	3.094	73.656	0.873	Medium	12.11	12.56	3.137	74.696	0.8453	Medium	12.12	12.56	3.115	74.165	0.8616	Medium	12.12	12.56	3.241	77.159	0.8872	High	12.12
E_D1165H+ FGFR	910	916	DVAADSQ	3.94	1	5	3.95	4.11	0.61	17.427	0.9044	Medium	3.95	4.11	0.616	17.609	0.9186	Medium	3.95	4.11	0.583	16.644	0.9239	Medium	3.95	4.11	1.151	32.898	0.9217	Medium	3.95	4.11	1.149	32.82	0.9178	Medium	3.95	4.11	1.141	32.605	0.9108	Medium	3.95	4.11	1.546	44.169	0.9199	Medium	3.95
E_D1165H+ FGFR	911	917	VAADSQE	3.88	1	5	3.98	4.05	0.806	23.038	0.8477	Medium	3.98	4.05	0.803	22.946	0.8458	Medium	3.98	4.05	0.786	22.449	0.8433	Medium	3.99	4.05	1.708	48.794	0.7993	Medium	3.98	4.05	1.712	48.914	0.8317	Medium	3.98	4.05	1.691	48.314	0.8232	Medium	3.99	4.05	2.057	58.761	0.8235	Medium	3.98
E_D1165H+ FGFR	917	921	EELQD	5.82	1	3	5.7	6.14	0.039	1.846	0.8177	Medium	5.71	6.14	0.022	1.045	0.8245	Medium	5.71	6.14	0.026	1.226	0.8177	Medium	5.71	6.14	0.047	2.257	0.8221	Medium	5.71	6.14	0.027	1.278	0.8381	Medium	5.71	6.14	0.071	3.386	0.8032	Medium	5.71	6.14	0.069	3.281	0.8693	Medium	5.7
E_D1165H+ FGFR	922	928	WVKKIRE	4.93	2	5	4.9	5.28	0.035	0.995	0.9486	Medium	4.9	5.29	0.029	0.829	0.9664	Medium	4.9	5.29	0.065	1.849	0.9077	Medium	4.9	5.29	0.033	0.932	0.9687	Medium	4.9	5.29	0.033	0.943	0.9594	Medium	4.9	5.29	0.043	1.229	0.9191	Medium	4.9	5.29	0.037	1.065	0.959	Medium	4.9
E_D1165H+ FGFR	922	934	WVKKIREVAQTAD	6.52	2	11	6.36	6.77	1.611	20.925	0.9454	High	6.36	6.77	1.598	20.756	0.928	High	6.36	6.77	1.561	20.267	0.945	High	6.35	6.77	2.408	31.277	0.9432	High	6.36	6.77	2.428	31.533	0.9176	High	6.36	6.77	2.421	31.44	0.9425	High	6.36	6.77	3.093	40.17	0.9242	High	6.36
E_D1165H+ FGFR	922	935	WVKKIREVAQTADA	6.85	2	12	6.88	7.04	2.058	24.499	0.9329	High	6.88	7.04	2.038	24.26	0.9325	High	6.88	7.04	2.007	23.891	0.9376	High	6.88	7.04	2.832	33.71	0.9263	High	6.88	7.04	2.872	34.192	0.9325	High	6.88	7.04	2.87	34.171	0.9295	High	6.88	7.04	3.496	41.617	0.9043	Medium	6.88
E_D1165H+ FGFR	929	935	VAQTADA	4.03	1	5	4.02	4.19	2.129	60.821	0.8504	Medium	4.02	4.19	2.12	60.568	0.8607	Medium	4.02	4.19	2.067	59.047	0.8505	Medium	4.02	4.2	2.756	78.75	0.8716	Medium	4.02	4.19	2.766	79.033	0.8261	Medium	4.02	4.19	2.751	78.59	0.8294	Medium	4.02	4.2	2.966	84.733	0.8272	Medium	4.02
E_D1165H+ FGFR	929	937	VAQTADARL	6.67	2	7	6.54	6.72	3.475	70.917	0.8342	Medium	6.55	6.72	3.441	70.233	0.8289	Medium	6.55	6.72	3.39	69.186	0.8197	Medium	6.54	6.72	4.094	83.543	0.8212	Medium	6.54	6.72	4.126	84.205	0.8137	Medium	6.55	6.72	4.119	84.052	0.8248	Medium	6.55	6.72	4.247	86.67	0.8338	Medium	6.54
E_D1165H+ FGFR	938	942	TEGKM	3.89	1	3	3.91	4.18	1.716	81.715	0.8886	Medium	3.91	4.19	1.694	80.673	0.8948	Medium	3.91	4.19	1.709	81.367	0.8936	Medium	3.91	4.19	1.721	81.959	0.8906	Medium	3.91	4.19	1.718	81.822	0.8981	Medium	3.91	4.19	1.716	81.735	0.8898	Medium	3.91	4.19	1.703	81.072	0.8987	Medium	3.91
E_D1165H+ FGFR	938	953	TEGKMMERRKKIALEL	7.43	4	14	7.48	7.56	3.038	30.998	0.9029	Medium	7.49	7.56	2.998	30.595	0.9045	Medium	7.49	7.56	2.977	30.382	0.8956	Medium	7.48	7.56	3.853	39.314	0.9067	Medium	7.48	7.56	3.851	39.291	0.904	Medium	7.49	7.56	3.884	39.631	0.897	Medium	7.49	7.56	4.357	44.459	0.919	Medium	7.48
E_D1165H+ FGFR	943	951	MERRKKIAL	4.84	2	7	4.86	5.18	1.997	40.763	0.951	Medium	4.86	5.18	1.956	39.922	0.9523	Medium	4.86	5.19	1.95	39.803	0.9489	Medium	4.86	5.19	2.498	50.975	0.9412	Medium	4.86	5.18	2.438	49.754	0.9376	Medium	4.86	5.19	2.438	49.765	0.9562	Medium	4.86	5.19	2.826	57.678	0.9608	Medium	4.86
E_D1165H+ FGFR	945	953	RRKKIALEL	7.11	3	7	7.06	7.34	1.152	23.505	0.8738	Medium	7.07	7.34	1.103	22.505	0.8921	Medium	7.07	7.34	1.091	22.27	0.89	Medium	7.06	7.34	1.942	39.634	0.8641	Medium	7.06	7.34	1.965	40.107	0.8979	Medium	7.07	7.34	1.955	39.903	0.9067	Medium	7.07	7.35	2.43	49.597	0.8832	Medium	7.06
E_D1165H+ FGFR	957	968	VVYCRPVPFDEE	10.06	2	8	9.77	10.25	1.03	18.391	0.8339	Medium	9.78	10.26	1.004	17.926	0.8364	Medium	9.78	10.26	0.959	17.126	0.818	Medium	9.77	10.25	1.293	23.085	0.8247	Medium	9.78	10.25	1.298	23.176	0.8347	Medium	9.78	10.26	1.316	23.493	0.8356	Medium	9.78	10.26	1.644	29.351	0.8278	Medium	9.77
E_D1165H+ FGFR	957	976	VVYCRPVPFDEEKIGTERAC	9.15	3	16	9.17	9.27	2.701	24.117	0.8815	Medium	9.17	9.27	2.606	23.271	0.8747	Medium	9.17	9.27	2.579	23.022	0.8916	Medium	9.17	9.27	4.321	38.581	0.839	Medium	9.17	9.27	4.316	38.534	0.8654	Medium	9.18	9.28	4.232	37.789	0.866	Medium	9.17	9.27	5.449	48.651	0.8639	Medium	9.17
E_D1165H+ FGFR	959	967	YCRPVPFDE	9.14	2	5	9	9.1	0.957	27.334	0.9002	Medium	9	9.11	0.936	26.746	0.9116	Medium	9	9.11	0.916	26.181	0.8884	Medium	9.01	9.1	1.029	29.395	0.9149	Medium	9	9.1	1.02	29.141	0.9219	Medium	9.01	9.11	1.018	29.091	0.9124	Medium	9	9.1	1.138	32.526	0.9129	Medium	9
E_D1165H+ FGFR	968	976	EKIGTERAC	4.72	2	7	4.81	4.85	2.095	42.76	0.9471	High	4.81	4.85	2.087	42.593	0.9493	High	4.81	4.85	2.015	41.132	0.943	High	4.81	4.85	3.315	67.654	0.9336	High	4.81	4.85	3.325	67.859	0.9435	High	4.81	4.85	3.28	66.948	0.9474	High	4.81	4.85	3.718	75.869	0.9444	High	4.81
E_D1165H+ FGFR	977	1003	YRDMSSFPETKAEKYVNKAKGKKFLQY	8.44	5	24	8.1	8.81	1.191	7.089	0.9053	High	8.11	8.81	1.187	7.063	0.9045	High	8.11	8.81	1.125	6.695	0.9056	High	8.11	8.82	2.757	16.408	0.9	High	8.11	8.81	2.759	16.424	0.9056	High	8.11	8.81	2.72	16.19	0.8968	High	8.11	8.81	4.59	27.322	0.8828	High	8.1
E_D1165H+ FGFR	978	983	RDMSSF	7.96	1	4	7.93	8.02	0.265	9.475	0.825	Medium	7.93	8.02	0.286	10.204	0.8697	Medium	7.93	8.02	0.248	8.843	0.8618	Medium	7.93	8.02	0.516	18.418	0.8411	Medium	7.93	8.02	0.523	18.678	0.831	Medium	7.93	8.03	0.539	19.255	0.8449	Medium	7.93	8.03	0.728	26.017	0.7918	Medium	7.93
E_D1165H+ FGFR	978	1008	RDMSSFPETKAEKYVNKAKGKKFLQYNRLQL	8.77	4	28	8.58	9.11	1.036	5.285	0.9504	High	8.59	9.11	1.05	5.359	0.9494	High	8.59	9.11	1.008	5.141	0.9484	High	8.59	9.11	2.414	12.318	0.9358	High	8.58	9.11	2.399	12.239	0.9383	High	8.59	9.12	2.394	12.214	0.9373	High	8.59	9.11	4.193	21.393	0.9053	High	8.58
E_D1165H+ FGFR	984	1008	PETKAEKYVNKAKGKKFLQYNRLQL	8.01	4	23	7.95	8.05	0.814	5.054	0.9436	High	7.96	8.06	0.79	4.908	0.9552	High	7.96	8.06	0.778	4.83	0.95	High	7.95	8.05	1.914	11.89	0.952	High	7.95	8.06	1.983	12.314	0.9463	High	7.96	8.06	1.959	12.169	0.9536	High	7.96	8.06	3.479	21.607	0.9331	High	7.95
E_D1165H+ FGFR	987	1003	KAEKYVNKAKGKKFLQY	5.89	4	15	5.91	6.02	0.513	4.886	0.8048	Medium	5.92	6.02	0.529	5.04	0.8151	Medium	5.92	6.02	0.468	4.461	0.8181	Medium	5.92	6.03	1.369	13.039	0.7873	Medium	5.91	6.02	1.313	12.508	0.7996	Medium	5.92	6.03	1.303	12.413	0.7907	Medium	5.92	6.03	2.369	22.566	0.7463	Medium	5.91
E_D1165H+ FGFR	1009	1018	SRIYPKGQRL	5.55	3	7	5.47	6.02	1.42	28.989	0.9423	High	5.47	6.02	1.397	28.505	0.9483	High	5.47	6.02	1.35	27.544	0.9401	High	5.47	6.03	2.148	43.841	0.9493	High	5.47	6.02	2.126	43.395	0.9476	High	5.47	6.03	2.143	43.73	0.9481	High	5.47	6.03	2.575	52.549	0.945	High	5.47
E_D1165H+ FGFR	1009	1022	SRIYPKGQRLDSSN	5.04	3	11	5.04	5.17	1.83	23.767	0.9038	High	5.04	5.17	1.776	23.066	0.8966	High	5.04	5.17	1.775	23.055	0.903	High	5.04	5.17	3.14	40.785	0.8418	Medium	5.04	5.17	3.11	40.385	0.8977	High	5.04	5.17	3.083	40.044	0.9188	High	5.04	5.17	3.9	50.645	0.8592	High	5.04
E_D1165H+ FGFR	1009	1029	SRIYPKGQRLDSSNYDPLPMW	11.46	4	16	11.21	11.9	1.28	11.43	0.8889	Medium	11.2	11.89	1.273	11.37	0.8942	High	11.2	11.89	1.209	10.799	0.8872	High	11.2	11.89	2.082	18.588	0.8751	Medium	11.2	11.89	2.057	18.366	0.8763	High	11.21	11.9	2.042	18.235	0.8726	Medium	11.21	11.9	2.622	23.408	0.8531	Medium	11.2
E_D1165H+ FGFR	1009	1032	SRIYPKGQRLDSSNYDPLPMWICG	12.63	4	19	12.38	12.89	0.871	6.55	0.9216	High	12.38	12.88	0.888	6.673	0.8983	High	12.38	12.88	0.821	6.173	0.9128	High	12.38	12.89	1.478	11.116	0.8851	High	12.39	12.89	1.444	10.861	0.8739	High	12.38	12.89	1.499	11.268	0.8851	High	12.38	12.89	1.971	14.819	0.8548	Medium	12.38
E_D1165H+ FGFR	1009	1035	SRIYPKGQRLDSSNYDPLPMWICGSQL	13.04	3	22	12.74	13.34	0.827	5.372	0.9545	High	12.73	13.34	0.849	5.515	0.9538	High	12.73	13.34	0.819	5.318	0.9486	High	12.73	13.33	1.448	9.4	0.9476	High	12.74	13.34	1.42	9.221	0.9499	High	12.74	13.34	1.435	9.317	0.9549	High	12.74	13.34	1.882	12.218	0.9513	High	12.74
E_D1165H+ FGFR	1012	1018	YPKGQRL	5.61	2	5	5.6	5.73	1.221	34.878	0.7656	Medium	5.6	5.73	1.271	36.305	0.7787	Medium	5.6	5.73	1.241	35.456	0.7346	Medium	5.61	5.73	1.836	52.445	0.7537	Medium	5.6	5.73	1.85	52.853	0.7892	Medium	5.61	5.73	1.842	52.62	0.7657	Medium	5.61	5.73	2.214	63.245	0.7436	Medium	5.6
E_D1165H+ FGFR	1019	1028	DSSNYDPLPM	11.16	1	6	11.13	11.36	0.013	0.317	0.8082	High	11.12	11.35	0.008	0.188	0.7953	Medium	11.12	11.35	0.03	0.706	0.8204	Medium	11.12	11.35	0.11	2.62	0.8672	High	11.12	11.35	0.116	2.751	0.813	Medium	11.12	11.36	0.049	1.177	0.8009	Medium	11.12	11.36	0.216	5.135	0.8617	High	11.12
E_D1165H+ FGFR	1019	1029	DSSNYDPLPMW	14.02	1	7	13.9	14.25	0.052	1.067	0.9254	High	13.9	14.24	0.035	0.724	0.921	Medium	13.9	14.25	0.048	0.977	0.928	High	13.91	14.25	0.08	1.635	0.9269	High	13.9	14.25	0.082	1.683	0.8905	Medium	13.9	14.25	0.06	1.219	0.9025	Medium	13.9	14.25	0.179	3.659	0.9103	High	13.9
E_D1165H+ FGFR	1029	1035	WICGSQL	11.9	1	5	11.85	11.94	0.05	1.417	0.787	Medium	11.84	11.93	0.075	2.146	0.7845	Medium	11.84	11.93	0.114	3.271	0.788	Medium	11.84	11.93	0.042	1.214	0.7893	Medium	11.84	11.93	0.06	1.71	0.7719	Medium	11.85	11.94	0.055	1.565	0.7572	Medium	11.85	11.94	0.039	1.111	0.8055	Medium	11.85
E_D1165H+ FGFR	1030	1035	ICGSQL	8.33	1	4	8.33	8.52	0.044	1.568	0.8132	Medium	8.33	8.53	0.043	1.543	0.8169	Medium	8.33	8.53	0.049	1.737	0.819	Medium	8.33	8.53	0.045	1.6	0.8099	Medium	8.33	8.53	0.012	0.412	0.8088	Medium	8.34	8.53	0.04	1.414	0.8173	Medium	8.34	8.52	0.008	0.299	0.8118	Medium	8.33
E_D1165H+ FGFR	1036	1049	VALNFQTPDKPMQM	10.61	2	10	10.35	10.95	0.249	3.559	0.9165	High	10.35	10.95	0.268	3.83	0.9143	High	10.35	10.95	0.244	3.485	0.9173	High	10.34	10.95	0.533	7.615	0.9219	High	10.35	10.95	0.546	7.8	0.9191	High	10.35	10.96	0.516	7.378	0.9172	High	10.35	10.95	0.557	7.96	0.9302	High	10.35
E_D1165H+ FGFR	1039	1049	NFQTPDKPMQM	9.19	2	7	9.2	9.4	0.266	5.427	0.895	High	9.2	9.4	0.266	5.424	0.8919	High	9.2	9.4	0.258	5.256	0.8891	High	9.19	9.4	0.538	10.984	0.8873	High	9.2	9.4	0.54	11.028	0.8821	High	9.2	9.4	0.581	11.852	0.8582	High	9.19	9.4	0.574	11.724	0.8351	Medium	9.2
E_D1165H+ FGFR	1050	1054	NQALF	10.82	1	3	10.73	10.98	0.023	1.103	0.8531	Medium	10.73	10.99	0.025	1.181	0.8622	Medium	10.73	10.99	0.031	1.477	0.8616	Medium	10.73	10.98	0.038	1.822	0.8471	Medium	10.73	10.98	0.031	1.477	0.8578	Medium	10.74	10.99	0.033	1.563	0.8528	Medium	10.73	10.98	0.033	1.584	0.8451	Medium	10.73
E_D1165H+ FGFR	1054	1068	FMAGGHCGYVLQPST	9.52	2	12	9.47	9.66	1.065	12.676	0.9285	High	9.47	9.66	1.062	12.637	0.9304	High	9.47	9.66	1.05	12.496	0.9256	High	9.47	9.66	1.214	14.458	0.887	High	9.47	9.66	1.215	14.469	0.9203	High	9.48	9.66	1.232	14.664	0.9076	High	9.47	9.66	2.086	24.83	0.9152	High	9.47
E_D1165H+ FGFR	1055	1062	MAGGHCGY	6.2	1	6	6.1	6.38	0.077	1.822	0.8763	Medium	6.1	6.38	0.077	1.838	0.8973	Medium	6.1	6.38	0.082	1.952	0.8925	Medium	6.09	6.37	0.185	4.407	0.8803	Medium	6.1	6.38	0.185	4.405	0.8871	Medium	6.1	6.38	0.146	3.484	0.8656	Medium	6.1	6.38	0.676	16.1	0.8947	Medium	6.1
E_D1165H+ FGFR	1055	1068	MAGGHCGYVLQPST	8.45	2	11	8.38	8.52	1.325	17.211	0.783	Medium	8.38	8.53	1.297	16.846	0.7818	Medium	8.38	8.53	1.284	16.677	0.7707	Medium	8.38	8.53	1.416	18.389	0.7807	Medium	8.38	8.53	1.382	17.945	0.7741	Medium	8.39	8.53	1.407	18.278	0.7762	Medium	8.38	8.52	1.779	23.11	0.8018	Medium	8.38
E_D1165H+ FGFR	1063	1068	VLQPST	5.66	1	3	5.59	5.69	1.341	63.879	0.7901	Medium	5.59	5.69	1.278	60.845	0.8194	Medium	5.59	5.69	1.314	62.556	0.7842	Medium	5.59	5.69	1.293	61.595	0.7975	Medium	5.59	5.69	1.319	62.821	0.8096	Medium	5.59	5.69	1.319	62.833	0.8015	Medium	5.59	5.69	1.296	61.73	0.8033	Medium	5.59
E_D1165H+ FGFR	1063	1069	VLQPSTM	7.96	1	4	7.79	8.2	1.292	46.14	0.8307	Medium	7.79	8.2	1.239	44.238	0.8412	Medium	7.79	8.2	1.229	43.895	0.8435	Medium	7.78	8.2	1.264	45.151	0.8321	Medium	7.79	8.2	1.266	45.209	0.8473	Medium	7.79	8.2	1.255	44.83	0.8457	Medium	7.79	8.2	1.219	43.543	0.8555	Medium	7.79
E_D1165H+ FGFR	1063	1082	VLQPSTMRDEAFDPFDKSSL	11.57	3	16	11.34	11.84	1.537	13.724	0.9012	Medium	11.33	11.83	1.507	13.452	0.9023	Medium	11.33	11.83	1.462	13.052	0.9008	Medium	11.33	11.83	2.433	21.722	0.8905	Medium	11.33	11.83	2.44	21.783	0.8959	Medium	11.33	11.84	2.447	21.848	0.8956	Medium	11.34	11.84	2.846	25.412	0.879	Medium	11.34
E_D1165H+ FGFR	1069	1082	MRDEAFDPFDKSSL	11.2	3	11	10.98	11.34	0.718	9.325	0.9277	High	10.99	11.34	0.75	9.743	0.9153	High	10.99	11.34	0.674	8.75	0.9371	High	10.98	11.34	1.549	20.123	0.9332	High	10.98	11.34	1.597	20.747	0.9148	High	10.99	11.34	1.568	20.365	0.9365	High	10.98	11.34	1.964	25.503	0.9293	High	10.98
E_D1165H+ FGFR	1070	1082	RDEAFDPFDKSSL	10.93	2	10	10.72	11.15	0.708	10.114	0.903	Medium	10.73	11.14	0.646	9.226	0.9204	Medium	10.73	11.14	0.625	8.934	0.9191	Medium	10.72	11.14	1.482	21.171	0.9194	Medium	10.72	11.14	1.493	21.332	0.9209	Medium	10.73	11.15	1.493	21.328	0.9217	Medium	10.72	11.14	1.873	26.758	0.9039	Medium	10.72
E_D1165H+ FGFR	1083	1090	RGLEPCVI	10.13	1	5	10.04	10.19	0.445	12.707	0.9089	Medium	10.05	10.19	0.461	13.178	0.9069	Medium	10.05	10.19	0.415	11.856	0.9093	Medium	10.04	10.19	1.102	31.473	0.8893	Medium	10.04	10.19	1.111	31.733	0.8892	Medium	10.05	10.19	1.077	30.772	0.8899	Medium	10.04	10.19	1.173	33.502	0.8808	Medium	10.04
E_D1165H+ FGFR	1083	1091	RGLEPCVIC	10.28	2	6	10.14	10.49	0.474	11.276	0.8981	High	10.14	10.49	0.474	11.277	0.9013	High	10.14	10.49	0.436	10.376	0.8944	High	10.13	10.49	1.056	25.133	0.8955	Medium	10.14	10.49	1.081	25.731	0.8971	Medium	10.14	10.49	1.063	25.315	0.8975	Medium	10.14	10.5	1.164	27.704	0.8922	Medium	10.14
E_D1165H+ FGFR	1092	1106	IEVLGARHLPKNGRG	6.2	4	12	6.09	6.28	1.481	17.634	0.9087	Medium	6.09	6.28	1.41	16.784	0.916	Medium	6.09	6.28	1.455	17.322	0.9147	Medium	6.09	6.27	1.789	21.301	0.917	Medium	6.09	6.28	1.776	21.14	0.9018	Medium	6.09	6.28	1.802	21.457	0.912	Medium	6.09	6.28	1.969	23.437	0.917	Medium	6.09
E_D1165H+ FGFR	1092	1109	IEVLGARHLPKNGRGIVC	7.9	4	15	7.93	8.02	1.48	14.095	0.9275	High	7.93	8.02	1.462	13.922	0.9249	High	7.93	8.02	1.45	13.807	0.9274	High	7.93	8.02	2.178	20.747	0.9317	High	7.93	8.02	2.186	20.823	0.9274	High	7.93	8.03	2.173	20.692	0.9322	High	7.93	8.03	2.507	23.878	0.9245	High	7.93
E_D1165H+ FGFR	1092	1115	IEVLGARHLPKNGRGIVCPFVEIE	10.78	5	20	10.92	11.02	1.029	7.352	0.9163	High	10.92	11.02	0.981	7.004	0.9156	High	10.92	11.02	0.967	6.906	0.9197	High	10.92	11.02	1.508	10.77	0.9121	High	10.92	11.02	1.461	10.436	0.9068	High	10.92	11.02	1.521	10.866	0.911	High	10.92	11.02	1.793	12.81	0.8934	High	10.92
E_D1165H+ FGFR	1110	1115	PFVEIE	10.67	1	4	10.69	10.75	0.054	1.922	0.8787	Medium	10.69	10.75	0.039	1.409	0.875	Medium	10.69	10.75	0.042	1.488	0.8728	Medium	10.69	10.75	0.025	0.9	0.8581	Medium	10.69	10.75	0.022	0.775	0.8495	Medium	10.7	10.75	0.042	1.514	0.8331	Medium	10.69	10.75	0.038	1.362	0.8332	Medium	10.69
E_D1165H+ FGFR	1114	1120	IEVAGAE	6.46	1	5	6.41	6.67	0.321	9.169	0.9179	Medium	6.41	6.67	0.329	9.393	0.9153	Medium	6.41	6.67	0.304	8.69	0.9072	Medium	6.4	6.67	0.594	16.962	0.9123	Medium	6.41	6.67	0.594	16.968	0.8979	Medium	6.41	6.67	0.578	16.52	0.9113	Medium	6.41	6.67	0.688	19.647	0.8965	Medium	6.41
E_D1165H+ FGFR	1114	1121	IEVAGAEY	9.14	1	6	9.14	9.2	0.32	7.615	0.9151	Medium	9.14	9.21	0.336	8.011	0.9066	Medium	9.14	9.21	0.307	7.302	0.9192	Medium	9.14	9.2	0.923	21.98	0.8836	Medium	9.14	9.21	0.907	21.601	0.8754	Medium	9.14	9.21	0.909	21.651	0.8882	Medium	9.14	9.2	1.234	29.383	0.8714	Medium	9.14
E_D1165H+ FGFR	1114	1130	IEVAGAEYDSTKQKTEF	8.6	3	15	8.64	8.94	0.572	5.451	0.9415	High	8.64	8.94	0.588	5.6	0.938	High	8.64	8.94	0.547	5.211	0.9326	High	8.65	8.93	1.931	18.393	0.934	High	8.64	8.94	1.922	18.308	0.9335	High	8.65	8.94	1.919	18.274	0.9351	High	8.64	8.93	3.288	31.313	0.9141	High	8.64
E_D1165H+ FGFR	1122	1130	DSTKQKTEF	6.08	2	7	6.02	6.17	0.299	6.092	0.9535	High	6.02	6.17	0.32	6.533	0.9029	High	6.02	6.17	0.287	5.865	0.9265	High	6.02	6.16	1.164	23.763	0.9434	High	6.02	6.17	1.179	24.067	0.9217	High	6.02	6.17	1.167	23.812	0.9402	High	6.02	6.17	2.223	45.371	0.9068	High	6.01
E_D1165H+ FGFR	1131	1137	VVDNGLN	5.92	1	5	5.94	6.07	0.067	1.916	0.8961	High	5.94	6.07	0.074	2.113	0.8916	High	5.94	6.07	0.067	1.921	0.8791	High	5.94	6.07	0.112	3.187	0.8783	High	5.94	6.07	0.092	2.635	0.8919	High	5.94	6.07	0.094	2.676	0.8927	High	5.94	6.07	0.39	11.144	0.8873	High	5.94
E_D1165H+ FGFR	1131	1154	VVDNGLNPVWPAKPFHFQISNPEF	12.65	2	18	12.67	12.82	0.534	4.235	0.9328	High	12.66	12.82	0.5	3.964	0.9312	High	12.66	12.81	0.436	3.457	0.8833	High	12.66	12.81	1.118	8.872	0.9052	High	12.66	12.82	1.077	8.551	0.914	High	12.67	12.82	1.145	9.088	0.908	High	12.67	12.82	1.863	14.784	0.9074	High	12.67
E_D1165H+ FGFR	1131	1155	VVDNGLNPVWPAKPFHFQISNPEFA	12.47	3	19	12.27	12.4	0.545	4.097	0.8205	Medium	12.26	12.4	0.572	4.3	0.8111	Medium	12.26	12.39	0.526	3.958	0.8031	Medium	12.26	12.39	1.176	8.842	0.845	Medium	12.26	12.4	1.173	8.817	0.8267	Medium	12.27	12.4	1.145	8.611	0.8185	Medium	12.27	12.4	1.938	14.572	0.8218	Medium	12.27
E_D1165H+ FGFR	1131	1156	VVDNGLNPVWPAKPFHFQISNPEFAF	13.64	3	20	13.2	13.82	0.527	3.762	0.9098	High	13.19	13.81	0.52	3.717	0.902	High	13.19	13.81	0.488	3.483	0.9063	High	13.2	13.82	1.131	8.082	0.9095	High	13.2	13.82	1.07	7.646	0.8979	Medium	13.2	13.82	1.114	7.958	0.8992	High	13.2	13.82	1.836	13.112	0.9145	High	13.2
E_D1165H+ FGFR	1138	1147	PVWPAKPFHF	11.46	3	6	11.39	11.57	0.48	11.427	0.9142	High	11.38	11.56	0.469	11.156	0.9211	High	11.38	11.56	0.443	10.545	0.9153	High	11.38	11.56	0.8	19.04	0.9092	High	11.38	11.56	0.78	18.563	0.9118	High	11.38	11.57	0.791	18.829	0.9091	High	11.39	11.57	1.212	28.866	0.9088	High	11.39
E_D1165H+ FGFR	1138	1154	PVWPAKPFHFQISNPEF	12.2	3	12	12.17	12.28	0.507	6.042	0.9465	High	12.17	12.28	0.504	6.003	0.9444	High	12.17	12.28	0.492	5.859	0.9399	High	12.17	12.28	1.073	12.769	0.941	High	12.17	12.28	1.075	12.795	0.946	High	12.17	12.28	1.089	12.959	0.9477	High	12.17	12.28	1.633	19.436	0.949	High	12.17
E_D1165H+ FGFR	1138	1156	PVWPAKPFHFQISNPEFAF	13.14	3	14	12.95	13.52	0.51	5.199	0.9465	High	12.94	13.52	0.495	5.055	0.938	High	12.94	13.52	0.497	5.07	0.9388	High	12.95	13.53	1.082	11.041	0.9418	High	12.95	13.53	1.07	10.919	0.939	High	12.95	13.53	1.094	11.159	0.9413	High	12.95	13.53	1.622	16.547	0.9485	High	12.95
E_D1165H+ FGFR	1148	1154	QISNPEF	9.46	1	4	9.3	9.79	0.067	2.4	0.9082	High	9.31	9.79	0.047	1.67	0.9096	High	9.31	9.79	0.134	4.78	0.8447	Medium	9.3	9.79	0.074	2.66	0.9076	High	9.31	9.79	0.071	2.55	0.9116	High	9.31	9.8	0.074	2.65	0.9086	High	9.3	9.8	0.323	11.536	0.9094	High	9.3
E_D1165H+ FGFR	1148	1155	QISNPEFA	8.93	1	5	8.78	8.88	0.045	1.298	0.9069	Medium	8.78	8.89	0.035	0.987	0.8923	Medium	8.78	8.89	0.044	1.26	0.9091	Medium	8.78	8.89	0.075	2.153	0.8974	Medium	8.78	8.89	0.06	1.717	0.8934	Medium	8.78	8.89	0.08	2.279	0.8973	Medium	8.77	8.88	0.324	9.254	0.8972	Medium	8.78
E_D1165H+ FGFR	1148	1156	QISNPEFAF	12.3	1	6	12.17	12.67	0.044	1.056	0.9159	High	12.16	12.66	0.067	1.598	0.9107	High	12.16	12.66	0.046	1.086	0.9267	High	12.16	12.66	0.082	1.962	0.9241	High	12.16	12.66	0.072	1.713	0.913	High	12.17	12.67	0.065	1.546	0.9226	High	12.17	12.67	0.296	7.037	0.9265	High	12.17
E_D1165H+ FGFR	1158	1166	RFVVYEEDM	10.23	2	7
E_D1165H+ FGFR	1160	1166	VVYEEDM	8.78	1	5
E_D1165H+ FGFR	1167	1172	FSDQNF	9.57	1	4	9.41	9.83	1.313	46.905	0.8608	Medium	9.42	9.84	1.353	48.313	0.8515	Medium	9.42	9.84	1.225	43.754	0.8366	Medium	9.41	9.83	1.711	61.092	0.8646	Medium	9.41	9.83	1.736	61.983	0.8525	Medium	9.42	9.84	1.721	61.471	0.8556	Medium	9.41	9.83	1.742	62.223	0.8735	Medium	9.41
E_D1165H+ FGFR	1167	1199	FSDQNFLAQATFPVKGLKTGYRAVPLKNNYSED	10.72	5	29	10.55	10.67	0.933	4.594	0.8057	Medium	10.56	10.68	0.952	4.692	0.8032	Medium	10.56	10.67	0.844	4.156	0.779	Medium	10.55	10.67	1.489	7.334	0.8101	Medium	10.56	10.67	1.478	7.282	0.7946	Medium	10.56	10.68	1.508	7.428	0.7878	Medium	10.56	10.67	2.28	11.232	0.816	Medium	10.56
E_D1165H+ FGFR	1173	1178	LAQATF	9.08	1	4	9.04	9.19	0.039	1.406	0.8453	Medium	9.05	9.19	0.038	1.342	0.8384	Medium	9.05	9.19	0.037	1.306	0.844	Medium	9.04	9.19	0.047	1.693	0.8492	Medium	9.05	9.19	0.059	2.107	0.8374	Medium	9.05	9.19	0.062	2.225	0.8379	Medium	9.04	9.19	0.213	7.599	0.8475	Medium	9.04
E_D1165H+ FGFR	1173	1196	LAQATFPVKGLKTGYRAVPLKNNY	8.62	4	20	8.61	8.76	0.142	1.016	0.8816	Medium	8.61	8.76	0.151	1.081	0.8842	Medium	8.61	8.76	0.184	1.312	0.8847	Medium	8.61	8.77	0.615	4.391	0.8793	Medium	8.61	8.76	0.651	4.651	0.8804	Medium	8.61	8.76	0.661	4.725	0.8889	Medium	8.61	8.76	1.247	8.906	0.8806	Medium	8.61
E_D1165H+ FGFR	1173	1199	LAQATFPVKGLKTGYRAVPLKNNYSED	8.55	5	23	8.36	9.06	0.144	0.894	0.9245	High	8.37	9.06	0.164	1.02	0.925	High	8.37	9.06	0.146	0.908	0.9233	High	8.36	9.06	0.602	3.739	0.9218	High	8.37	9.06	0.595	3.695	0.9267	High	8.37	9.07	0.601	3.732	0.9265	High	8.36	9.06	1.307	8.117	0.9242	High	8.36
E_D1165H+ FGFR	1174	1199	AQATFPVKGLKTGYRAVPLKNNYSED	8.18	4	22	8.14	8.24	0.204	1.323	0.8733	High	8.14	8.24	0.222	1.444	0.8731	High	8.14	8.24	0.204	1.326	0.8871	High	8.14	8.24	0.707	4.591	0.8494	Medium	8.14	8.24	0.681	4.423	0.8727	High	8.14	8.24	0.665	4.319	0.8765	High	8.14	8.24	1.381	8.966	0.8484	Medium	8.14
E_D1165H+ FGFR	1176	1199	ATFPVKGLKTGYRAVPLKNNYSED	8.12	4	20	8	8.11	0.223	1.589	0.906	High	8	8.11	0.256	1.83	0.9079	High	8	8.12	0.25	1.787	0.8925	High	8	8.12	0.639	4.566	0.9053	High	8	8.11	0.644	4.602	0.8996	High	8	8.12	0.673	4.807	0.8875	Medium	8	8.12	1.178	8.416	0.8997	High	8
E_D1165H+ FGFR	1179	1187	PVKGLKTGY	6.03	2	7	6.05	6.22	0.135	2.753	0.8659	Medium	6.05	6.22	0.101	2.07	0.9189	Medium	6.05	6.22	0.116	2.369	0.9294	Medium	6.05	6.21	0.504	10.279	0.8628	Medium	6.05	6.22	0.491	10.027	0.8702	Medium	6.05	6.22	0.512	10.441	0.8713	Medium	6.05	6.22	1.08	22.035	0.8652	Medium	6.05
E_D1165H+ FGFR	1179	1196	PVKGLKTGYRAVPLKNNY	6.81	4	15	6.74	6.81	0.164	1.566	0.8611	Medium	6.74	6.81	0.151	1.439	0.8654	Medium	6.74	6.81	0.136	1.293	0.8637	Medium	6.73	6.81	0.673	6.407	0.8759	Medium	6.74	6.81	0.574	5.467	0.8523	Medium	6.74	6.82	0.64	6.098	0.8193	Medium	6.74	6.82	1.095	10.426	0.8783	Medium	6.74
E_D1165H+ FGFR	1188	1199	RAVPLKNNYSED	5.77	3	9	5.63	6.07	0.122	1.931	0.9438	High	5.63	6.08	0.143	2.267	0.953	High	5.63	6.07	0.128	2.029	0.9477	High	5.63	6.07	0.462	7.334	0.9505	High	5.63	6.07	0.462	7.328	0.951	High	5.63	6.08	0.466	7.4	0.9494	High	5.63	6.08	0.7	11.112	0.9377	High	5.63
G_CD + Lipid	26	33	CRSLEVGT	6.68	2	6	6.55	6.93	0.455	10.839	0.8478	Medium	6.55	6.93	0.475	11.298	0.8489	Medium	6.55	6.93	0.472	11.234	0.8407	Medium	6.55	6.93	1.086	25.855	0.8301	Medium	6.56	6.93	1.032	24.579	0.8387	Medium							6.55	6.93	2.469	58.789	0.8006	Medium	6.55
G_CD + Lipid	26	35	CRSLEVGTVM	9.41	2	8	9.28	9.35	0.501	8.94	0.8667	Medium	9.3	9.35	0.439	7.839	0.9253	High	9.3	9.35	0.429	7.663	0.9185	High	9.3	9.35	1.367	24.406	0.9293	High	9.29	9.35	1.308	23.363	0.9174	High							9.27	9.36	3	53.577	0.9011	Medium	9.3
G_CD + Lipid	33	37	TVMTL	10.28	1	3	10.2	10.24	0.08	3.79	0.8437	Medium	10.21	10.24	0.079	3.751	0.8371	Medium	10.21	10.24	0.089	4.219	0.818	Medium	10.21	10.24	0.038	1.814	0.8327	Medium	10.21	10.24	0.081	3.85	0.8118	Medium							10.21	10.24	0.086	4.085	0.8021	Medium	10.2
G_CD + Lipid	37	54	LFYSKKSQRPERKTFQVK	6.62	5	15	6.55	7	0.791	7.534	0.9388	Medium	6.55	7	0.8	7.621	0.9508	High	6.54	6.99	0.778	7.406	0.9381	Medium	6.55	7	1.69	16.096	0.945	High	6.55	7	1.607	15.306	0.9471	Medium							6.55	7	2.038	19.409	0.9477	High	6.54
G_CD + Lipid	38	52	FYSKKSQRPERKTFQ	4.22	3	12	4.23	4.68	1.358	16.17	0.9474	High	4.23	4.68	1.379	16.419	0.9443	High	4.22	4.68	1.307	15.562	0.9438	High	4.23	4.68	2.139	25.464	0.9444	High	4.23	4.68	2.068	24.615	0.9227	Medium							4.23	4.68	2.529	30.113	0.942	High	4.23
G_CD + Lipid	38	55	FYSKKSQRPERKTFQVKL	6.68	4	15	6.53	7.03	0.773	7.358	0.9467	High	6.53	7.03	0.824	7.849	0.9408	High	6.52	7.03	0.743	7.079	0.9477	High	6.53	7.03	1.709	16.28	0.9311	High	6.53	7.03	1.591	15.151	0.9441	High							6.53	7.03	2.033	19.359	0.9388	High	6.53
G_CD + Lipid	53	57	VKLET	5.86	1	3	5.89	5.98	0.808	38.492	0.9178	Medium	5.89	5.98	0.795	37.84	0.9096	Medium	5.89	5.98	0.785	37.4	0.9366	Medium	5.89	5.98	1.691	80.522	0.891	Medium	5.89	5.98	1.671	79.575	0.8815	Medium							5.89	5.98	1.884	89.696	0.9108	Medium	5.89
G_CD + Lipid	56	74	ETRQITWSRGADKIEGSID	8.66	4	17	8.61	9.04	2.263	19.013	0.8754	Medium	8.61	9.04	2.326	19.542	0.8963	Medium	8.61	9.03	2.217	18.626	0.8824	Medium	8.61	9.04	3.454	29.022	0.8925	Medium	8.61	9.04	3.377	28.379	0.871	Medium							8.61	9.04	4.902	41.192	0.8609	Medium	8.61
G_CD + Lipid	58	74	RQITWSRGADKIEGSID	8.44	2	15	8.25	8.71	2.093	19.931	0.8865	High	8.25	8.71	2.195	20.9	0.8874	High	8.25	8.71	2.112	20.112	0.8819	High	8.25	8.71	3.332	31.736	0.8768	High	8.25	8.71	3.194	30.416	0.8497	Medium							8.25	8.71	4.715	44.901	0.8585	Medium	8.25
G_CD + Lipid	75	89	IREIKEIRPGKTSRD	4.77	4	12	4.71	5.2	0.596	7.093	0.9421	High	4.71	5.2	0.597	7.109	0.9251	High	4.7	5.2	0.582	6.927	0.9454	High	4.71	5.2	1.404	16.719	0.9457	High	4.71	5.2	1.325	15.772	0.939	High							4.71	5.2	1.992	23.718	0.9459	High	4.71
G_CD + Lipid	75	107	IREIKEIRPGKTSRDFDRYQEDPAFRPDQSHCF	8.23	5	28	8.01	8.56	2.667	13.608	0.8968	Medium	8.01	8.56	2.739	13.975	0.8837	High	8.01	8.56	2.57	13.114	0.8884	Medium	8.02	8.56	4.612	23.529	0.8875	High	8.02	8.56	4.541	23.167	0.8687	High							8.01	8.56	5.642	28.786	0.8825	High	8.01
G_CD + Lipid	78	89	IKEIRPGKTSRD	3.88	4	9	3.83	4.41	0.591	9.378	0.9466	High	3.83	4.41	0.63	10.005	0.9438	High	3.83	4.41	0.587	9.322	0.9446	High	3.83	4.41	1.453	23.056	0.9365	High	3.83	4.41	1.231	19.535	0.9525	High							3.83	4.41	2.022	32.094	0.9441	High	3.83
G_CD + Lipid	78	90	IKEIRPGKTSRDF	5.82	4	10	5.65	6.08	0.514	7.34	0.9327	Medium	5.65	6.08	0.557	7.951	0.9088	Medium	5.64	6.08	0.51	7.291	0.9292	Medium	5.65	6.08	1.233	17.619	0.907	Medium	5.65	6.09	1.138	16.264	0.8904	Medium							5.65	6.08	2.032	29.026	0.9111	Medium	5.65
G_CD + Lipid	78	106	IKEIRPGKTSRDFDRYQEDPAFRPDQSHC	7.17	4	24	7.02	7.4	2.953	17.575	0.8743	Medium	7.02	7.4	2.993	17.816	0.8448	Medium	7.02	7.4	2.917	17.364	0.8568	Medium	7.02	7.4	5.088	30.286	0.8542	Medium	7.03	7.4	5.051	30.066	0.8513	Medium							7.02	7.4	6.385	38.004	0.8522	Medium	7.02
G_CD + Lipid	90	106	FDRYQEDPAFRPDQSHC	7.75	3	13	7.68	8.16	2.665	29.282	0.9278	High	7.68	8.15	2.732	30.027	0.9263	High	7.67	8.15	2.57	28.238	0.9304	High	7.68	8.16	4.192	46.065	0.9216	High	7.68	8.16	4.223	46.411	0.9139	High							7.68	8.16	4.58	50.33	0.9257	High	7.68
G_CD + Lipid	94	107	QEDPAFRPDQSHCF	9.22	2	10	9.12	9.33	1.466	20.947	0.7167	Medium	9.12	9.34	1.544	22.063	0.7354	Medium	9.12	9.33	1.461	20.867	0.7548	Medium	9.12	9.33	2.336	33.368	0.748	Medium	9.13	9.33	2.366	33.797	0.6462	Medium							9.12	9.33	2.618	37.397	0.7114	Medium	9.12
G_CD + Lipid	97	106	PAFRPDQSHC	6.15	2	7	6.16	6.24	1.749	35.685	0.8	Medium	6.15	6.24	1.686	34.411	0.8939	Medium	6.16	6.24	1.668	34.049	0.8454	Medium	6.16	6.24	2.137	43.603	0.8664	Medium	6.16	6.24	2.154	43.967	0.8003	Medium							6.16	6.24	2.535	51.733	0.8153	Medium	6.16
G_CD + Lipid	111	115	YGMEF	12	1	3	11.83	11.9	0.149	7.096	0.8661	Medium	11.83	11.9	0.149	7.084	0.893	Medium	11.84	11.91	0.159	7.566	0.8731	Medium	11.83	11.9	0.492	23.438	0.8597	Medium	11.84	11.91	0.436	20.739	0.8163	Medium							11.87	11.94	0.539	25.659	0.8769	Medium	11.83
G_CD + Lipid	115	122	FRLKTLSL	10.23	2	6	10.21	10.56	0.039	0.928	0.938	High	10.21	10.56	0.035	0.833	0.9371	High	10.22	10.56	0.04	0.944	0.9372	Medium	10.21	10.56	0.096	2.296	0.9346	Medium	10.22	10.56	0.103	2.455	0.9328	Medium							10.21	10.56	0.427	10.172	0.9338	Medium	10.21
G_CD + Lipid	116	122	RLKTLSL	8.5	2	5	8.35	8.75	0.084	2.407	0.8802	Medium	8.35	8.75	0.027	0.776	0.9097	High	8.35	8.75	0.019	0.556	0.9161	High	8.35	8.75	0.032	0.919	0.9531	High	8.35	8.76	0.04	1.151	0.9273	Medium							8.35	8.75	0.065	1.86	0.9513	High	8.35
G_CD + Lipid	123	128	QATSED	3.41	1	4	3.38	3.56	1.172	41.846	0.8017	Medium	3.38	3.56	1.176	41.988	0.8134	Medium	3.38	3.56	1.063	37.981	0.8353	Medium	3.38	3.56	1.596	57.011	0.8133	Medium	3.38	3.56	1.575	56.234	0.8315	Medium							3.38	3.56	1.904	68.017	0.8218	Medium	3.38
G_CD + Lipid	132	140	MWIKGLTWL	14.05	2	7	13.96	14.28	0.004	0.073	0.9062	Medium	13.95	14.28	0.023	0.479	0.8719	Medium	13.95	14.28	0.012	0.248	0.8947	Medium	13.95	14.28	0.036	0.735	0.8835	Medium	13.96	14.28	0.024	0.496	0.8115	Medium							13.95	14.28	0.02	0.418	0.9062	High	13.96
G_CD + Lipid	133	140	WIKGLTWL	13.86	1	6	13.75	14.07	0.027	0.653	0.9131	Medium	13.74	14.07	0.008	0.196	0.9225	High	13.74	14.07	0.006	0.146	0.9069	High	13.74	14.07	0.026	0.612	0.9141	High	13.75	14.07	0.018	0.425	0.8771	Medium							13.74	14.07	0.042	1.005	0.9114	High	13.75
G_CD + Lipid	141	145	MEDTL	8.66	1	3	8.55	8.84	0.04	1.887	0.8992	Medium	8.55	8.84	0.039	1.838	0.8983	Medium	8.55	8.83	0.036	1.738	0.8992	Medium	8.55	8.84	0.048	2.276	0.8932	Medium	8.55	8.84	0.045	2.164	0.8986	Medium							8.55	8.84	0.164	7.811	0.896	Medium	8.55
G_CD + Lipid	141	146	MEDTLQ	7.25	1	4	7.18	7.47	0.145	5.17	0.6828	Medium	7.18	7.47	0.127	4.523	0.7155	Medium	7.18	7.47	0.13	4.655	0.6822	Medium	7.18	7.47	0.165	5.884	0.6859	Medium	7.19	7.47	0.171	6.11	0.7066	Medium							7.18	7.47	0.611	21.839	0.6928	Medium	7.18
G_CD + Lipid	141	156	MEDTLQAATPLQIERW	12.52	3	13	12.39	12.53	0.123	1.356	0.8969	High	12.39	12.53	0.099	1.085	0.9098	High	12.39	12.53	0.126	1.384	0.9069	High	12.39	12.53	0.567	6.235	0.8976	High	12.39	12.54	0.546	6	0.886	Medium							12.39	12.53	1.304	14.332	0.9001	High	12.39
G_CD + Lipid	141	161	MEDTLQAATPLQIERWLRKQF	13.19	4	18	13.03	13.7	0.087	0.69	0.9514	High	13.03	13.69	0.096	0.758	0.9404	High	13.04	13.69	0.094	0.748	0.9481	High	13.03	13.69	0.579	4.593	0.9377	High	13.04	13.7	0.534	4.241	0.9377	High							13.03	13.69	1.432	11.363	0.9518	High	13.03
G_CD + Lipid	141	162	MEDTLQAATPLQIERWLRKQFY	13.4	4	19	13.41	13.62	0.076	0.574	0.9262	High	13.41	13.62	0.086	0.649	0.9307	High	13.41	13.62	0.083	0.625	0.9266	High	13.4	13.61	0.586	4.404	0.9004	Medium	13.41	13.62	0.49	3.684	0.8894	Medium							13.4	13.61	1.534	11.531	0.9169	High	13.4
G_CD + Lipid	141	181	MEDTLQAATPLQIERWLRKQFYSVDRNREDRISAKDLKNML	12.24	5	38	12.24	12.56	1.123	4.222	0.9288	High	12.24	12.57	1.195	4.491	0.9288	High	12.24	12.57	1.108	4.166	0.9295	High	12.24	12.56	3.265	12.274	0.9133	High	12.24	12.57	3.107	11.681	0.9152	High							12.24	12.56	5.667	21.303	0.919	High	12.24
G_CD + Lipid	143	161	DTLQAATPLQIERWLRKQF	13.2	4	16	13	13.47	0.102	0.909	0.8762	Medium	13	13.47	0.107	0.955	0.8725	Medium	13	13.47	0.1	0.892	0.8732	Medium	13	13.46	0.645	5.756	0.8321	Medium	13.01	13.47	0.537	4.792	0.7913	Medium							13	13.46	1.44	12.858	0.8862	High	13
G_CD + Lipid	146	161	QAATPLQIERWLRKQF	12.25	3	13	12.13	12.61	0.078	0.852	0.931	High	12.13	12.62	0.073	0.807	0.9164	Medium	12.14	12.62	0.079	0.871	0.9057	Medium	12.14	12.62	0.426	4.686	0.9103	Medium	12.14	12.62	0.407	4.476	0.899	Medium							12.14	12.61	0.83	9.124	0.9064	High	12.14
G_CD + Lipid	146	162	QAATPLQIERWLRKQFY	12.52	4	14	12.63	12.71	0.054	0.547	0.9521	High	12.63	12.71	0.073	0.741	0.9342	High	12.64	12.71	0.08	0.819	0.9487	High	12.63	12.71	0.45	4.589	0.899	High	12.64	12.71	0.429	4.373	0.9103	Medium							12.63	12.71	0.949	9.679	0.9431	High	12.63
G_CD + Lipid	162	181	YSVDRNREDRISAKDLKNML	9.03	3	18	8.88	9.37	1.258	9.982	0.9385	High	8.88	9.38	1.279	10.149	0.9355	High	8.88	9.37	1.21	9.6	0.9359	High	8.88	9.37	2.688	21.332	0.9256	High	8.88	9.38	2.664	21.141	0.9135	High							8.88	9.37	3.908	31.013	0.9141	High	8.88
G_CD + Lipid	162	184	YSVDRNREDRISAKDLKNMLSQV	10.24	4	21	10.2	10.28	1.198	8.15	0.8534	Medium	10.2	10.28	1.162	7.904	0.9065	High	10.2	10.29	1.103	7.506	0.8984	High	10.2	10.28	2.512	17.088	0.8985	High	10.2	10.29	2.501	17.016	0.8258	Medium							10.2	10.28	4.326	29.429	0.852	Medium	10.2
G_CD + Lipid	182	193	SQVNYRVPNMRF	9.9	3	9	9.75	10.26	2.114	33.559	0.9147	High	9.75	10.27	2.16	34.294	0.9198	High	9.75	10.27	2.042	32.414	0.9032	High	9.75	10.26	3.037	48.199	0.9156	High	9.76	10.27	3.049	48.393	0.9001	High							9.75	10.26	3.508	55.688	0.9126	High	9.75
G_CD + Lipid	185	193	NYRVPNMRF	9.68	3	6	9.53	10.1	2.056	48.947	0.9433	Medium	9.54	10.1	2.102	50.044	0.9482	Medium	9.53	10.1	2.028	48.286	0.9242	Medium	9.53	10.1	2.973	70.796	0.9329	Medium	9.53	10.1	2.938	69.95	0.9141	Medium							9.53	10.1	3.181	75.744	0.9276	Medium	9.53
G_CD + Lipid	186	193	YRVPNMRF	9.68	3	5	9.52	9.98	1.978	56.526	0.9148	Medium	9.52	9.98	2.066	59.036	0.9363	Medium	9.51	9.98	1.922	54.924	0.9055	Medium	9.52	9.98	2.87	81.988	0.9167	Medium	9.51	9.98	2.796	79.873	0.8786	Medium							9.52	9.98	3.004	85.837	0.9095	Medium	9.52
G_CD + Lipid	192	201	RFLRERLTDL	8.9	3	8	8.93	9.01	1.547	27.625	0.8973	Medium	8.93	9.01	1.581	28.23	0.9289	Medium	8.93	9.01	1.472	26.28	0.9049	Medium	8.93	9.01	3.525	62.939	0.8944	Medium	8.93	9.02	3.606	64.389	0.8547	Medium							8.93	9.01	3.716	66.358	0.8679	Medium	8.93
G_CD + Lipid	194	201	LRERLTDL	8.31	2	6	8.21	8.73	1.343	31.971	0.8022	Medium	8.21	8.73	1.378	32.801	0.8198	Medium	8.2	8.72	1.253	29.841	0.8129	Medium	8.21	8.73	2.804	66.767	0.801	Medium	8.21	8.73	2.796	66.57	0.7695	Medium							8.21	8.73	2.875	68.443	0.7902	Medium	8.21
G_CD + Lipid	202	213	EQRSGDITYGQF	9.68	2	10	9.54	10.07	1.24	17.708	0.9107	High	9.54	10.07	1.248	17.834	0.9083	High	9.54	10.08	1.198	17.117	0.9192	High	9.54	10.07	1.939	27.695	0.9093	High	9.54	10.08	1.884	26.91	0.9205	High							9.54	10.07	3.078	43.978	0.9078	High	9.54
G_CD + Lipid	217	221	YRSLM	8.39	1	3	8.36	8.65	0.032	1.532	0.8095	Medium	8.36	8.65	0.043	2.066	0.8322	Medium	8.35	8.65	0.033	1.551	0.8262	Medium	8.36	8.65	0.052	2.48	0.8393	Medium	8.36	8.66	0.053	2.547	0.795	Medium							8.36	8.65	0.067	3.169	0.8196	Medium	8.36
G_CD + Lipid	221	235	MYSAQKTMDLPFLET	12.73	2	12	12.79	12.87	1.441	17.159	0.806	Medium	12.79	12.87	1.451	17.271	0.8144	Medium	12.79	12.87	1.364	16.243	0.8085	Medium	12.79	12.87	3.064	36.477	0.7754	Medium	12.8	12.87	3.056	36.385	0.7525	Medium							12.79	12.87	4.957	59.018	0.7904	Medium	12.79
G_CD + Lipid	222	233	YSAQKTMDLPFL	13.14	2	9	12.88	13.5	0.661	10.491	0.9429	High	12.88	13.5	0.698	11.077	0.9309	High	12.89	13.5	0.659	10.453	0.9364	High	12.88	13.5	1.843	29.255	0.8941	High	12.89	13.5	1.827	28.997	0.9217	Medium							12.88	13.5	3.518	55.838	0.9098	High	12.88
G_CD + Lipid	222	235	YSAQKTMDLPFLET	12.47	2	11	11.93	13.01	1.366	17.735	0.9183	High	11.93	13.01	1.421	18.452	0.923	High	11.94	13.01	1.328	17.24	0.925	High	11.94	13.01	2.971	38.586	0.9307	High	11.94	13.01	2.916	37.866	0.9193	High							11.93	13.01	4.588	59.586	0.9156	High	11.93
G_CD + Lipid	236	246	NTLRTGERPEL	7.21	3	8	7.04	7.55	3.493	62.374	0.9428	High	7.04	7.55	3.527	62.981	0.9435	High	7.04	7.55	3.425	61.157	0.9029	High	7.04	7.55	4.401	78.584	0.9419	High	7.04	7.56	4.394	78.459	0.9127	High							7.04	7.55	4.394	78.456	0.9388	High	7.04
G_CD + Lipid	247	251	CQVSL	9.14	1	3	8.91	9.06	0.106	5.052	0.7348	Medium	8.91	9.06	0.053	2.507	0.7458	Medium	8.91	9.06	0.044	2.108	0.7493	Medium	8.91	9.06	0.074	3.535	0.7574	Medium	8.92	9.07	0.058	2.749	0.7328	Medium							8.91	9.06	0.132	6.283	0.7186	Medium	8.91
G_CD + Lipid	247	253	CQVSLSE	7.8	1	5	7.62	7.9	0.258	7.376	0.8658	Medium	7.62	7.89	0.259	7.402	0.8821	Medium	7.62	7.89	0.227	6.478	0.8808	Medium	7.62	7.9	0.671	19.174	0.8734	Medium	7.62	7.9	0.666	19.024	0.8688	Medium							7.62	7.9	1.025	29.295	0.864	Medium	7.62
G_CD + Lipid	249	254	VSLSEF	11.41	1	4	11.25	11.53	0.213	7.59	0.8606	Medium	11.25	11.53	0.216	7.697	0.8731	Medium	11.25	11.54	0.183	6.55	0.8822	Medium	11.25	11.53	0.594	21.219	0.8689	Medium	11.25	11.54	0.603	21.55	0.8032	Medium							11.25	11.53	0.838	29.915	0.8158	Medium	11.25
G_CD + Lipid	254	258	FQQFL	11.89	1	3	11.76	12.05	0.051	2.448	0.8639	Medium	11.76	12.05	0.03	1.419	0.8084	Medium	11.76	12.06	0.025	1.178	0.8481	Medium	11.76	12.05	0.022	1.033	0.8516	Medium	11.76	12.06	0.054	2.563	0.8436	Medium							11.76	12.05	0.053	2.547	0.8495	Medium	11.76
G_CD + Lipid	259	265	LEYQGEL	9.84	1	5	9.7	10.09	0.159	4.539	0.9256	High	9.7	10.09	0.164	4.693	0.9216	High	9.7	10.09	0.163	4.651	0.9077	High	9.7	10.09	0.667	19.062	0.9192	High	9.7	10.09	0.675	19.278	0.8946	High							9.7	10.09	1.158	33.084	0.9177	High	9.7
G_CD + Lipid	266	271	WAVDRL	10.39	1	4	10.23	10.55	0.621	22.182	0.8691	Medium	10.23	10.55	0.611	21.811	0.8907	Medium	10.24	10.55	0.57	20.372	0.8667	Medium	10.23	10.55	1.072	38.279	0.8482	Medium	10.24	10.55	1.09	38.921	0.811	Medium							10.23	10.55	1.232	44.016	0.8158	Medium	10.23
G_CD + Lipid	276	280	FMLSF	14.12	1	3	13.95	14.32	0.016	0.751	0.9119	High	13.95	14.31	0.013	0.628	0.9159	High	13.94	14.31	0.025	1.209	0.9104	High	13.94	14.31	0.053	2.52	0.9136	High	13.95	14.32	0.042	1.985	0.9162	Medium							13.94	14.31	0.077	3.683	0.9153	High	13.95
G_CD + Lipid	281	287	LRDPLRE	7.17	1	4	6.95	7.27	0.058	2.059	0.9245	Medium	6.95	7.26	0.098	3.518	0.9176	Medium	6.94	7.26	0.07	2.493	0.928	Medium	6.95	7.27	0.418	14.931	0.9031	Medium	6.95	7.27	0.413	14.74	0.9141	Medium							6.95	7.27	1.322	47.218	0.914	Medium	6.95
G_CD + Lipid	281	293	LRDPLREIEEPYF	11.83	3	9	11.66	12.24	0.539	8.555	0.9595	High	11.66	12.25	0.57	9.054	0.9533	High	11.66	12.25	0.507	8.054	0.9459	High	11.66	12.25	1.613	25.609	0.9414	High	11.66	12.25	1.511	23.987	0.9447	High							11.66	12.25	2.552	40.511	0.9457	High	11.66
G_CD + Lipid	288	293	IEEPYF	11.78	1	3	11.79	11.87	0.195	9.274	0.9131	Medium	11.79	11.87	0.202	9.627	0.9051	Medium	11.8	11.87	0.195	9.266	0.9035	Medium	11.79	11.87	0.365	17.388	0.9024	Medium	11.8	11.87	0.364	17.326	0.8934	Medium							11.79	11.87	0.391	18.623	0.882	Medium	11.79
G_CD + Lipid	294	298	FLDEL	11.89	1	3	11.72	12.02	0.028	1.336	0.8959	Medium	11.72	12.02	0.022	1.031	0.9005	High	11.72	12.02	0.014	0.67	0.904	Medium	11.72	12.02	0.056	2.684	0.8936	Medium	11.72	12.02	0.06	2.867	0.9033	Medium							11.72	12.02	0.148	7.061	0.8985	Medium	11.72
G_CD + Lipid	298	302	LVTFL	13.19	1	3	12.97	13.48	0.022	1.064	0.8731	Medium	12.97	13.48	0.014	0.662	0.9314	High	12.97	13.47	0.001	0.06	0.9389	High	12.97	13.47	0.018	0.833	0.9211	Medium	12.97	13.48	0.011	0.521	0.9239	Medium							12.97	13.47	0.01	0.47	0.9298	High	12.97
G_CD + Lipid	303	310	FSKENSVW	9.79	2	6	9.66	9.86	0.071	1.694	0.8891	Medium	9.66	9.86	0.077	1.829	0.882	Medium	9.66	9.86	0.065	1.55	0.9069	Medium	9.66	9.86	0.077	1.831	0.8749	Medium	9.66	9.87	0.074	1.766	0.8737	Medium							9.66	9.86	0.14	3.331	0.8732	Medium	9.66
G_CD + Lipid	303	314	FSKENSVWNSQL	10.56	2	10	10.33	10.82	0.117	1.665	0.86	Medium	10.33	10.82	0.135	1.922	0.8737	High	10.34	10.82	0.132	1.882	0.868	High	10.33	10.82	0.817	11.666	0.8781	High	10.34	10.82	0.807	11.525	0.8734	Medium							10.33	10.82	2.02	28.862	0.8538	Medium	10.33
G_CD + Lipid	315	329	DAVCPETMNNPLSHY	10.56	2	11	10.06	11.04	0.763	9.907	0.7957	Medium	10.06	11.04	0.774	10.056	0.7848	Medium	10.07	11.05	0.697	9.045	0.7901	Medium	10.06	11.05	1.702	22.11	0.749	Medium	10.07	11.05	1.711	22.224	0.7753	Medium							10.06	11.04	2.673	34.71	0.7301	Medium	10.06
G_CD + Lipid	319	329	PETMNNPLSHY	9.73	2	8	9.26	9.96	0.085	1.526	0.9202	High	9.26	9.96	0.072	1.286	0.9193	High	9.25	9.96	0.088	1.567	0.9122	High	9.26	9.96	0.252	4.508	0.9133	High	9.26	9.97	0.254	4.534	0.9152	High							9.26	9.96	0.914	16.314	0.9161	Medium	9.26
G_CD + Lipid	330	337	WISSSANT	7.66	1	6	7.54	8.04	0.077	1.844	0.915	High	7.54	8.04	0.071	1.69	0.9245	High	7.53	8.04	0.073	1.739	0.9188	High	7.54	8.04	0.092	2.185	0.9225	High	7.54	8.04	0.07	1.66	0.9205	High							7.54	8.04	0.16	3.818	0.9176	High	7.54
G_CD + Lipid	330	339	WISSSANTYL	11.57	1	8	11.61	11.85	0.184	3.29	0.8989	Medium	11.61	11.85	0.161	2.876	0.8893	Medium	11.61	11.85	0.181	3.237	0.8956	Medium	11.61	11.85	0.22	3.926	0.8678	Medium	11.61	11.86	0.194	3.459	0.886	Medium							11.61	11.85	0.324	5.789	0.8789	Medium	11.61
G_CD + Lipid	344	350	FSSESSL	8.36	1	5	8.34	8.45	0.529	15.118	0.8415	Medium	8.34	8.45	0.505	14.423	0.8475	Medium	8.34	8.45	0.509	14.551	0.8482	Medium	8.34	8.45	1.321	37.754	0.8088	Medium	8.34	8.45	1.351	38.613	0.8202	Medium							8.34	8.45	2.207	63.07	0.8213	Medium	8.34
G_CD + Lipid	345	350	SSESSL	6.35	1	4	6.27	6.35	0.324	11.578	0.8737	High	6.26	6.35	0.33	11.795	0.8928	High	6.26	6.35	0.315	11.266	0.8868	High	6.27	6.35	1.144	40.863	0.8641	High	6.27	6.35	1.116	39.873	0.8596	High							6.27	6.35	2.023	72.255	0.887	High	6.27
G_CD + Lipid	345	352	SSESSLEA	6.53	1	6	6.6	6.7	0.518	12.34	0.8237	Medium	6.6	6.7	0.523	12.446	0.7651	Medium	6.59	6.69	0.506	12.042	0.8169	Medium	6.6	6.7	1.697	40.397	0.7755	Medium	6.6	6.7	1.621	38.59	0.7719	Medium							6.6	6.7	2.547	60.645	0.7919	Medium	6.6
G_CD + Lipid	357	363	LRMGCRC	6.3	2	5	6.12	6.44	0.041	1.169	0.9422	Medium	6.11	6.44	0.037	1.047	0.9453	Medium	6.11	6.43	0.038	1.086	0.9393	Medium	6.12	6.44	0.046	1.309	0.9336	Medium	6.12	6.44	0.091	2.596	0.9022	Medium							6.12	6.44	0.049	1.407	0.941	Medium	6.12
G_CD + Lipid	367	375	DCWDGPDGM	11.64	1	6	11.51	11.69	0.532	12.676	0.8206	Medium	11.52	11.69	0.514	12.23	0.8317	Medium	11.52	11.7	0.494	11.766	0.8144	Medium	11.52	11.69	0.712	16.963	0.8759	Medium	11.52	11.7	0.669	15.938	0.8513	Medium							11.51	11.69	1.042	24.803	0.8548	Medium	11.51
G_CD + Lipid	367	386	DCWDGPDGMPVIYHGHTLTT	10.88	3	16	10.69	11.43	0.954	8.513	0.9345	High	10.69	11.43	1.025	9.154	0.9292	High	10.7	11.44	0.94	8.389	0.9366	High	10.69	11.43	2.291	20.456	0.9344	High	10.7	11.44	2.313	20.656	0.9439	High							10.69	11.43	2.89	25.808	0.9372	High	10.69
G_CD + Lipid	367	394	DCWDGPDGMPVIYHGHTLTTKIKFSDVL	11.61	4	24	11.6	11.69	1.05	6.25	0.899	High	11.6	11.69	1.039	6.182	0.8667	High	11.6	11.7	1.051	6.257	0.9029	High	11.6	11.69	2.747	16.35	0.8871	High	11.6	11.7	2.565	15.266	0.8508	Medium							11.6	11.69	3.818	22.729	0.8746	High	11.6
G_CD + Lipid	367	396	DCWDGPDGMPVIYHGHTLTTKIKFSDVLHT	10.9	5	26	10.82	11.17	1.005	5.522	0.8866	High	10.82	11.17	1.068	5.867	0.8743	Medium	10.82	11.17	1.038	5.703	0.8678	Medium	10.82	11.17	2.647	14.547	0.8624	Medium	10.82	11.18	2.458	13.508	0.8305	Medium							10.82	11.17	3.616	19.87	0.8594	Medium	10.82
G_CD + Lipid	376	386	PVIYHGHTLTT	7.16	3	9	7.21	7.36	0.555	8.804	0.9159	Medium	7.2	7.36	0.604	9.591	0.8915	Medium	7.2	7.36	0.527	8.37	0.8863	Medium	7.21	7.36	1.911	30.331	0.8805	Medium	7.21	7.36	1.841	29.224	0.8785	Medium							7.21	7.36	2.081	33.029	0.8917	Medium	7.21
G_CD + Lipid	387	394	KIKFSDVL	9.87	1	6	9.76	10.07	0.35	8.342	0.9223	Medium	9.76	10.07	0.359	8.545	0.909	Medium	9.76	10.08	0.351	8.346	0.9367	Medium	9.76	10.07	0.691	16.45	0.9191	Medium	9.76	10.08	0.66	15.726	0.9086	Medium							9.76	10.07	1.088	25.903	0.9128	Medium	9.76
G_CD + Lipid	387	399	KIKFSDVLHTIKE	9.3	3	11	9.2	9.3	0.29	3.761	0.9459	Medium	9.19	9.3	0.287	3.727	0.8788	Medium	9.19	9.3	0.278	3.617	0.9434	Medium	9.2	9.3	0.522	6.776	0.9424	Medium	9.2	9.29	0.563	7.318	0.9234	Medium							9.2	9.3	0.868	11.275	0.9343	Medium	9.2
G_CD + Lipid	391	399	SDVLHTIKE	7.38	3	7	7.24	7.33	0.052	1.06	0.8676	Medium	7.24	7.34	0.055	1.116	0.8973	High	7.24	7.33	0.048	0.981	0.8681	High	7.24	7.34	0.076	1.543	0.9126	High	7.24	7.34	0.088	1.798	0.879	Medium							7.24	7.33	0.156	3.18	0.8715	High	7.24
G_CD + Lipid	391	401	SDVLHTIKEHA	7.91	3	9	7.85	8.25	0.069	1.09	0.8831	Medium	7.85	8.25	0.07	1.114	0.8427	Medium	7.85	8.25	0.085	1.346	0.8618	Medium	7.86	8.25	0.059	0.931	0.8609	Medium	7.86	8.25	0.065	1.03	0.8737	Medium							7.86	8.25	0.136	2.162	0.8856	Medium	7.85
G_CD + Lipid	400	407	HAFVASEY	8.18	1	6	8.04	8.4	0.171	4.076	0.8761	Medium	8.04	8.4	0.181	4.305	0.8491	Medium	8.04	8.4	0.187	4.46	0.8257	Medium	8.04	8.4	0.738	17.58	0.8421	Medium	8.04	8.4	0.793	18.883	0.7739	Medium							8.04	8.4	1.697	40.412	0.827	Medium	8.04
G_CD + Lipid	400	411	HAFVASEYPVIL	11.91	2	9	11.74	12.13	0.143	2.269	0.8527	Medium	11.74	12.13	0.12	1.903	0.8557	Medium	11.75	12.13	0.147	2.335	0.8442	Medium	11.74	12.13	0.57	9.053	0.8116	Medium	11.75	12.13	0.448	7.112	0.8329	Medium							11.74	12.13	1.242	19.711	0.8355	Medium	11.74
G_CD + Lipid	402	406	FVASE	6.03	1	3	5.97	6.27	0.26	12.364	0.7821	Medium	5.96	6.26	0.242	11.503	0.802	Medium	5.96	6.26	0.236	11.224	0.8029	Medium	5.97	6.27	0.783	37.267	0.7956	Medium	5.97	6.27	0.708	33.729	0.7823	Medium							5.97	6.27	1.469	69.958	0.8097	Medium	5.97
G_CD + Lipid	407	411	YPVIL	12.15	1	3	11.77	12.29	0.021	0.988	0.9148	Medium	11.78	12.3	0.019	0.899	0.917	Medium	11.78	12.3	0.019	0.886	0.919	Medium	11.78	12.3	0.02	0.933	0.8995	Medium	11.78	12.3	0.013	0.633	0.9112	Medium							11.78	12.3	0.02	0.953	0.9079	Medium	11.77
G_CD + Lipid	412	437	SIEDHCSIAQQRNMAQHFRKVLGDTL	10.39	4	24	10.32	10.84	1.29	7.679	0.936	High	10.32	10.84	1.335	7.946	0.9316	High	10.33	10.85	1.29	7.676	0.9326	High	10.32	10.84	1.925	11.457	0.935	High	10.33	10.85	1.791	10.659	0.9458	High							10.32	10.84	3.109	18.504	0.9354	High	10.32
G_CD + Lipid	428	437	HFRKVLGDTL	7.8	3	8	7.89	7.96	0.197	3.511	0.9361	Medium	7.89	7.95	0.261	4.67	0.9031	Medium	7.88	7.95	0.217	3.878	0.9138	Medium	7.89	7.96	0.529	9.447	0.9259	Medium	7.89	7.96	0.623	11.128	0.8987	Medium							7.89	7.96	1.246	22.259	0.9294	Medium	7.89
G_CD + Lipid	438	443	LTKPVD	4.58	1	3	4.6	4.87	0.573	27.274	0.8686	Medium	4.61	4.87	0.569	27.09	0.8499	Medium	4.6	4.86	0.648	30.874	0.8365	Medium	4.61	4.87	1.141	54.343	0.8597	Medium	4.61	4.87	1.079	51.368	0.83	Medium							4.61	4.87	1.624	77.334	0.872	Medium	4.6
G_CD + Lipid	438	446	LTKPVDIAA	7.34	1	6	7.28	7.66	1.957	46.606	0.8826	Medium	7.28	7.66	1.999	47.59	0.897	Medium	7.27	7.66	1.919	45.697	0.8761	Medium	7.28	7.66	2.503	59.588	0.8964	Medium	7.28	7.66	2.42	57.608	0.8464	Medium							7.28	7.66	3.022	71.95	0.8708	Medium	7.28
G_CD + Lipid	438	455	LTKPVDIAADGLPSPNQL	10.67	3	13	10.49	10.69	2.237	24.58	0.9088	Medium	10.49	10.69	2.282	25.075	0.9388	Medium	10.5	10.7	2.198	24.157	0.9184	Medium	10.49	10.69	2.841	31.215	0.9306	Medium	10.5	10.7	2.766	30.397	0.8824	Medium							10.49	10.69	3.758	41.292	0.8862	Medium	10.49
G_CD + Lipid	438	471	LTKPVDIAADGLPSPNQLKRKILIKHKKLAEGSA	8.17	5	29	7.81	8.64	3.826	18.849	0.9239	High	7.81	8.64	3.92	19.311	0.9349	High	7.81	8.64	3.749	18.47	0.9066	High	7.81	8.64	4.778	23.536	0.9312	High	7.82	8.65	4.577	22.545	0.8746	Medium							7.81	8.64	5.82	28.672	0.9118	Medium	7.81
G_CD + Lipid	438	472	LTKPVDIAADGLPSPNQLKRKILIKHKKLAEGSAY	8.72	5	30	8.53	8.6	4.223	20.111	0.8763	High	8.54	8.6	4.382	20.865	0.9104	High	8.53	8.6	4.203	20.016	0.8818	Medium	8.54	8.6	5.262	25.059	0.8912	Medium	8.54	8.61	5.028	23.945	0.8289	Medium							8.54	8.6	6.254	29.781	0.8531	High	8.53
G_CD + Lipid	444	455	IAADGLPSPNQL	10.42	1	8	10.61	10.77	0.81	14.466	0.8515	Medium	10.61	10.77	0.81	14.458	0.8665	Medium	10.61	10.77	0.854	15.259	0.8418	Medium	10.61	10.77	0.983	17.556	0.852	Medium	10.61	10.77	0.96	17.151	0.864	Medium							10.61	10.77	1.415	25.264	0.8465	Medium	10.61
G_CD + Lipid	447	455	DGLPSPNQL	10.11	1	5	9.93	10.41	0.064	1.831	0.887	High	9.93	10.41	0.061	1.753	0.8901	High	9.92	10.41	0.088	2.501	0.877	High	9.93	10.41	0.074	2.114	0.8718	High	9.93	10.41	0.07	2.013	0.8846	Medium							9.93	10.41	0.141	4.039	0.8741	High	9.93
G_CD + Lipid	447	471	DGLPSPNQLKRKILIKHKKLAEGSA	7.22	4	21	7.24	7.71	1.989	13.528	0.905	Medium	7.24	7.71	2.076	14.119	0.909	Medium	7.24	7.71	1.955	13.297	0.9013	Medium	7.24	7.71	2.418	16.447	0.9165	Medium	7.24	7.71	2.305	15.68	0.9013	Medium							7.24	7.71	2.629	17.886	0.9116	Medium	7.24
G_CD + Lipid	456	471	KRKILIKHKKLAEGSA	3.66	4	14	3.66	4.14	2.344	23.914	0.9596	High	3.66	4.14	2.359	24.067	0.9674	High	3.65	4.14	2.274	23.203	0.9485	High	3.66	4.14	2.722	27.774	0.9576	High	3.66	4.14	2.617	26.701	0.9538	High							3.66	4.14	2.876	29.343	0.9564	High	3.66
G_CD + Lipid	456	472	KRKILIKHKKLAEGSAY	4.25	4	15	4.34	4.42	2.789	26.565	0.947	Medium	4.35	4.42	2.763	26.315	0.9584	Medium	4.34	4.42	2.715	25.86	0.9381	Medium	4.35	4.42	3.173	30.218	0.9569	Medium	4.35	4.42	3.133	29.84	0.9321	Medium							4.34	4.42	3.385	32.236	0.9506	Medium	4.34
G_CD + Lipid	472	480	YEEVPTSVM	9.79	1	6	9.64	10.43	3.212	76.469	0.9016	High	9.64	10.43	3.215	76.554	0.93	High	9.64	10.44	3.156	75.139	0.8862	High	9.64	10.43	3.512	83.609	0.9189	High	9.64	10.44	3.497	83.265	0.888	Medium							9.64	10.43	3.475	82.738	0.8977	High	9.64
G_CD + Lipid	473	480	EEVPTSVM	9.08	1	5	8.85	9.44	2.859	81.681	0.8613	Medium	8.85	9.44	2.897	82.771	0.869	Medium	8.85	9.44	2.825	80.728	0.8428	Medium	8.85	9.44	3.142	89.783	0.8716	Medium	8.86	9.44	3.115	88.998	0.8293	Medium							8.85	9.44	3.123	89.222	0.8669	Medium	8.85
G_CD + Lipid	481	488	YSENDISN	6.21	1	6	6.11	6.39	2.445	58.225	0.8547	Medium	6.1	6.4	2.483	59.125	0.8701	Medium	6.11	6.39	2.401	57.163	0.8559	Medium	6.11	6.39	3.15	74.997	0.8648	Medium	6.11	6.4	3.011	71.679	0.8231	Medium							6.11	6.39	3.099	73.783	0.8466	Medium	6.11
G_CD + Lipid	481	495	YSENDISNSIKNGIL	11.41	2	13	11.26	11.77	1.867	20.518	0.9372	High	11.27	11.77	1.935	21.268	0.9262	High	11.27	11.77	1.839	20.211	0.9329	High	11.26	11.77	3.296	36.224	0.9225	High	11.27	11.77	3.192	35.075	0.908	High							11.26	11.77	3.856	42.373	0.9255	High	11.26
G_CD + Lipid	481	496	YSENDISNSIKNGILY	11.53	2	14	11.46	11.58	1.654	16.879	0.8226	Medium	11.46	11.58	1.894	19.329	0.8865	Medium	11.46	11.59	1.755	17.906	0.883	Medium	11.46	11.58	3.53	36.022	0.8585	Medium	11.46	11.59	3.121	31.844	0.8108	Medium							11.46	11.58	3.531	36.031	0.759	Medium	11.46
G_CD + Lipid	481	509	YSENDISNSIKNGILYLEDPVNHEWYPHY	13.81	4	25	13.75	13.85	1.516	8.66	0.9013	High	13.74	13.84	1.631	9.319	0.9357	High	13.74	13.84	1.49	8.516	0.932	High	13.74	13.84	2.993	17.105	0.9334	High	13.75	13.85	2.445	13.969	0.8222	Medium							13.74	13.84	3.657	20.9	0.8669	High	13.75
G_CD + Lipid	489	495	SIKNGIL	8.77	2	5	8.61	8.95	0.091	2.589	0.9495	High	8.61	8.95	0.08	2.286	0.9137	Medium	8.61	8.95	0.071	2.027	0.8928	Medium	8.61	8.96	0.333	9.517	0.9285	Medium	8.61	8.96	0.327	9.341	0.901	Medium							8.61	8.96	0.638	18.228	0.9261	Medium	8.61
G_CD + Lipid	496	509	YLEDPVNHEWYPHY	10.77	2	10	10.48	11.27	0.042	0.606	0.9252	Medium	10.48	11.28	0.062	0.88	0.9219	Medium	10.49	11.28	0.04	0.571	0.9081	Medium	10.48	11.27	0.09	1.29	0.9199	Medium	10.49	11.28	0.062	0.892	0.9144	Medium							10.48	11.27	0.26	3.71	0.9187	Medium	10.48
G_CD + Lipid	497	509	LEDPVNHEWYPHY	10.4	3	9	10.45	10.5	0.079	1.255	0.8877	High	10.45	10.5	0.124	1.976	0.8909	High	10.45	10.5	0.124	1.961	0.8852	High	10.45	10.5	0.158	2.506	0.889	High	10.45	10.5	0.091	1.449	0.8884	High							10.45	10.5	0.351	5.569	0.8728	High	10.45
G_CD + Lipid	510	519	FVLTSSKIYY	10.93	2	8	10.79	11.18	0.372	6.649	0.8422	Medium	10.79	11.18	0.353	6.305	0.8321	Medium	10.8	11.18	0.346	6.18	0.8197	Medium	10.79	11.18	0.931	16.62	0.8193	Medium	10.8	11.18	0.88	15.707	0.8468	Medium							10.79	11.18	1.154	20.612	0.8154	Medium	10.79
G_CD + Lipid	510	522	FVLTSSKIYYSEE	10.17	2	11	10.07	10.41	0.681	8.841	0.9294	High	10.07	10.42	0.696	9.038	0.9265	High	10.08	10.42	0.68	8.834	0.9298	High	10.07	10.42	1.704	22.134	0.9283	High	10.08	10.42	1.625	21.099	0.9414	High							10.07	10.42	2.002	25.998	0.9285	High	10.07
G_CD + Lipid	523	530	TSSDQGNE	3.19	1	6	3.33	3.5	2.372	56.482	0.8106	Medium	3.33	3.51	2.301	54.786	0.8319	Medium	3.33	3.5	2.206	52.513	0.8018	Medium	3.33	3.51	2.306	54.91	0.7944	Medium	3.33	3.51	2.291	54.536	0.7998	Medium							3.33	3.5	2.266	53.952	0.8025	Medium	3.33
G_CD + Lipid	523	531	TSSDQGNED	3.46	1	7	3.45	3.58	2.609	53.246	0.7644	Medium	3.46	3.58	2.676	54.61	0.7518	Medium	3.45	3.58	2.439	49.775	0.7211	Medium	3.45	3.58	2.662	54.336	0.7645	Medium	3.46	3.58	2.715	55.408	0.6773	Medium							3.45	3.58	2.629	53.647	0.7675	Medium	3.45
G_CD + Lipid	545	566	HSSEKWFHGKLGAGRDGRHIAE	6.25	5	20	6.13	6.26	2.605	18.604	0.8353	Medium	6.13	6.25	2.687	19.196	0.9101	High	6.13	6.26	2.598	18.557	0.8809	Medium	6.13	6.26	4.054	28.954	0.8914	Medium	6.14	6.26	4.126	29.475	0.8513	Medium							6.13	6.26	5.113	36.523	0.8468	Medium	6.13
G_CD + Lipid	545	568	HSSEKWFHGKLGAGRDGRHIAERL	6.89	5	22	6.8	7.31	2.05	13.314	0.9053	High	6.8	7.31	2.116	13.743	0.9114	High	6.79	7.31	2.05	13.31	0.91	High	6.8	7.31	3.788	24.6	0.9037	High	6.8	7.31	3.757	24.398	0.903	High							6.8	7.31	5.23	33.958	0.9062	High	6.8
G_CD + Lipid	572	583	YCIETGAPDGSF	10.72	1	9	10.57	11.25	0.387	6.145	0.9107	High	10.58	11.26	0.408	6.474	0.922	High	10.58	11.26	0.372	5.902	0.9206	High	10.58	11.26	1.342	21.304	0.9031	High	10.58	11.26	1.281	20.328	0.9184	High							10.57	11.25	2.35	37.309	0.9108	High	10.57
G_CD + Lipid	573	583	CIETGAPDGSF	9.62	1	8	9.41	9.94	0.453	8.095	0.8419	Medium	9.41	9.94	0.47	8.393	0.8537	High	9.4	9.93	0.459	8.203	0.8643	Medium	9.41	9.94	1.426	25.465	0.8432	Medium	9.41	9.94	1.35	24.114	0.8611	Medium							9.41	9.94	2.326	41.529	0.847	Medium	9.41
G_CD + Lipid	573	584	CIETGAPDGSFL	11.73	1	9	11.55	11.93	0.361	5.723	0.779	Medium	11.55	11.93	0.412	6.542	0.7913	Medium	11.55	11.94	0.412	6.54	0.7815	Medium	11.55	11.94	1.221	19.384	0.7727	Medium	11.55	11.94	1.161	18.432	0.7591	Medium							11.55	11.93	1.992	31.613	0.745	Medium	11.55
G_CD + Lipid	574	583	IETGAPDGSF	9.08	1	7	8.98	9.41	0.437	8.909	0.8708	Medium	8.98	9.41	0.463	9.454	0.8772	Medium	8.98	9.4	0.421	8.584	0.8812	Medium	8.98	9.41	1.251	25.528	0.8673	Medium	8.98	9.41	1.194	24.359	0.8722	Medium							8.98	9.41	1.786	36.454	0.8451	Medium	8.98
G_CD + Lipid	584	590	LVRESET	4.35	2	5	4.29	4.77	1.271	36.324	0.9287	High	4.29	4.77	1.288	36.807	0.9324	High	4.28	4.77	1.225	35.006	0.9199	High	4.29	4.77	1.478	42.226	0.9474	High	4.29	4.77	1.403	40.087	0.946	High							4.29	4.77	2.071	59.165	0.9519	High	4.29
G_CD + Lipid	595	599	YTLSF	12.25	1	3	12.03	12.44	0.018	0.88	0.8401	Medium	12.03	12.44	0.022	1.045	0.8546	Medium	12.03	12.44	0.039	1.851	0.8414	Medium	12.03	12.44	0.019	0.925	0.8427	Medium	12.03	12.44	0.062	2.94	0.8291	Medium							12.03	12.44	0.022	1.065	0.814	Medium	12.03
G_CD + Lipid	600	621	WRNGKVQHCRIHSRQDAGTPKF	5.45	5	19	5.36	6.45	1.522	11.447	0.9436	High	5.36	6.45	1.559	11.723	0.941	High	5.36	6.45	1.448	10.887	0.9417	High	5.36	6.45	1.883	14.161	0.9416	High	5.36	6.45	1.807	13.586	0.9472	High							5.36	6.45	2.329	17.511	0.9447	High	5.36
G_CD + Lipid	622	627	FLTDNL	10.94	1	4	10.79	11.15	0.73	26.08	0.8991	Medium	10.79	11.15	0.745	26.591	0.9039	Medium	10.8	11.16	0.705	25.192	0.8902	Medium	10.79	11.15	1.344	47.99	0.8754	Medium	10.8	11.16	1.292	46.135	0.8593	Medium							10.79	11.15	1.849	66.042	0.8239	Medium	10.79
G_CD + Lipid	622	629	FLTDNLVF	14.01	1	6	13.84	14.2	0.471	11.212	0.8877	Medium	13.84	14.2	0.524	12.481	0.8922	Medium	13.83	14.2	0.489	11.652	0.9016	Medium	13.83	14.19	1.063	25.308	0.9105	Medium	13.84	14.2	0.974	23.186	0.8667	Medium							13.83	14.19	1.788	42.577	0.9082	Medium	13.84
G_CD + Lipid	628	632	VFDSL	10.45	1	3	10.44	10.7	0.171	8.155	0.813	Medium	10.44	10.7	0.194	9.222	0.8428	Medium	10.44	10.71	0.179	8.516	0.8454	Medium	10.44	10.7	0.806	38.361	0.8353	Medium	10.45	10.71	0.783	37.263	0.8026	Medium							10.44	10.7	0.912	43.433	0.7952	Medium	10.44
G_CD + Lipid	633	637	YDLIT	9.85	1	3	9.73	10.13	0.019	0.92	0.8559	Medium	9.74	10.13	0.017	0.824	0.8512	Medium	9.73	10.13	0.014	0.645	0.8414	Medium	9.74	10.13	0.016	0.774	0.8333	Medium	9.73	10.13	0.013	0.642	0.8346	Medium							9.74	10.13	0.02	0.965	0.84	Medium	9.73
G_CD + Lipid	633	646	YDLITHYQQVPLRC	10.28	3	11	10.22	10.39	0.743	9.655	0.9233	High	10.22	10.39	0.773	10.04	0.9315	High	10.23	10.39	0.697	9.053	0.9233	High	10.22	10.39	1.343	17.448	0.9192	High	10.23	10.39	1.271	16.5	0.9324	High							10.22	10.39	1.979	25.707	0.9308	High	10.22
G_CD + Lipid	633	648	YDLITHYQQVPLRCNE	9.85	3	13	9.74	9.84	1.229	13.507	0.937	High	9.75	9.85	1.272	13.973	0.9322	High	9.74	9.84	1.189	13.069	0.935	High	9.74	9.85	1.779	19.544	0.9313	High	9.75	9.85	1.683	18.499	0.9181	High							9.74	9.84	2.395	26.321	0.9133	High	9.74
G_CD + Lipid	636	646	ITHYQQVPLRC	7.78	2	8	7.68	7.89	0.827	14.773	0.9264	Medium	7.68	7.89	0.856	15.287	0.9279	Medium	7.67	7.88	0.76	13.572	0.9307	Medium	7.68	7.89	1.423	25.409	0.9225	High	7.68	7.89	1.398	24.973	0.8692	Medium							7.68	7.89	2.042	36.464	0.905	High	7.68
G_CD + Lipid	638	648	HYQQVPLRCNE	6.79	3	8	6.84	6.91	1.38	24.636	0.905	High	6.84	6.91	1.412	25.211	0.9005	Medium	6.84	6.91	1.325	23.662	0.9109	High	6.84	6.92	1.918	34.256	0.8931	Medium	6.84	6.92	1.892	33.777	0.9034	Medium							6.84	6.91	2.548	45.506	0.8939	Medium	6.84
G_CD + Lipid	640	648	QQVPLRCNE	6.68	2	6	6.58	6.81	1.679	39.981	0.8759	Medium	6.58	6.8	1.699	40.456	0.8829	Medium	6.58	6.8	1.615	38.449	0.8801	Medium	6.58	6.81	2.219	52.825	0.8911	Medium	6.58	6.81	2.155	51.319	0.8775	Medium							6.58	6.81	2.703	64.354	0.8695	Medium	6.58
G_CD + Lipid	649	662	FEMRLSEPVPQTNA	9.69	2	10	9.73	9.78	1.603	22.9	0.9345	High	9.74	9.79	1.623	23.184	0.925	High	9.73	9.78	1.575	22.5	0.9273	High	9.74	9.79	2.679	38.273	0.901	High	9.73	9.79	2.602	37.169	0.9075	High							9.74	9.79	3.587	51.24	0.9082	High	9.73
G_CD + Lipid	649	667	FEMRLSEPVPQTNAHESKE	8.33	4	15	8.18	8.76	1.682	16.015	0.9421	High	8.18	8.76	1.749	16.657	0.9415	High	8.18	8.76	1.64	15.619	0.9365	High	8.18	8.76	2.88	27.427	0.9407	High	8.19	8.77	2.796	26.627	0.9372	High							8.18	8.76	3.976	37.865	0.9301	High	8.18
G_CD + Lipid	650	662	EMRLSEPVPQTNA	8.18	2	9	8.11	8.18	1.693	26.868	0.8659	Medium	8.11	8.18	1.757	27.883	0.831	Medium	8.11	8.18	1.678	26.627	0.8326	Medium	8.12	8.18	2.631	41.765	0.8104	Medium	8.12	8.19	2.567	40.745	0.825	Medium							8.12	8.18	3.246	51.524	0.8307	Medium	8.11
G_CD + Lipid	650	667	EMRLSEPVPQTNAHESKE	6.68	4	14	6.58	7.08	2.003	20.441	0.9306	High	6.58	7.08	2.06	21.022	0.9291	High	6.58	7.08	1.925	19.638	0.9235	High	6.58	7.08	3.046	31.084	0.909	Medium	6.58	7.08	3	30.614	0.9075	High							6.58	7.08	4.047	41.291	0.8905	Medium	6.58
G_CD + Lipid	651	662	MRLSEPVPQTNA	7.8	2	8	7.68	7.77	1.658	29.611	0.8318	Medium	7.68	7.77	1.768	31.566	0.8387	Medium	7.67	7.77	1.634	29.179	0.8305	Medium	7.68	7.77	2.287	40.84	0.8522	Medium	7.68	7.77	2.168	38.71	0.773	Medium							7.68	7.77	2.851	50.914	0.7912	Medium	7.68
G_CD + Lipid	651	667	MRLSEPVPQTNAHESKE	6.4	4	13	6.21	6.63	1.937	21.285	0.9467	High	6.2	6.63	1.988	21.842	0.9336	High	6.21	6.63	1.899	20.869	0.9442	High	6.21	6.63	2.677	29.422	0.9261	High	6.21	6.63	2.575	28.293	0.9226	High							6.21	6.63	3.58	39.337	0.9247	High	6.21
G_CD + Lipid	668	682	WYHASLTRAQAEHML	9.41	3	13	9.54	9.66	1.076	11.824	0.9118	High	9.54	9.66	1.155	12.692	0.8743	Medium	9.54	9.66	1.076	11.821	0.8957	High	9.54	9.66	1.927	21.181	0.8921	Medium	9.54	9.66	1.752	19.249	0.8683	Medium							9.54	9.66	2.697	29.642	0.8946	Medium	9.54
G_CD + Lipid	674	682	TRAQAEHML	6.79	2	7	6.69	7.12	0.251	5.124	0.9219	High	6.69	7.12	0.263	5.368	0.915	High	6.68	7.12	0.228	4.646	0.9175	High	6.69	7.13	0.515	10.517	0.9189	High	6.69	7.13	0.559	11.418	0.8642	Medium							6.69	7.12	0.88	17.955	0.9207	High	6.69
G_CD + Lipid	683	691	MRVPRDGAF	8.07	2	6	7.99	8.3	0.117	2.778	0.9001	Medium	7.99	8.3	0.184	4.378	0.8445	Medium	7.99	8.3	0.147	3.494	0.8659	Medium	7.99	8.3	0.247	5.873	0.8557	Medium	7.99	8.3	0.228	5.423	0.8507	Medium							7.99	8.3	0.368	8.768	0.9	Medium	7.99
G_CD + Lipid	692	701	LVRKRNEPNS	3.34	3	7	3.26	3.75	1.653	33.726	0.9649	High	3.26	3.75	1.698	34.66	0.9663	High	3.26	3.74	1.58	32.239	0.9459	High	3.26	3.75	2.433	49.646	0.9622	High	3.26	3.75	2.345	47.865	0.932	High							3.26	3.75	2.439	49.768	0.9591	High	3.26
G_CD + Lipid	692	702	LVRKRNEPNSY	4.14	3	8	4.09	4.76	1.446	25.827	0.959	High	4.09	4.77	1.47	26.257	0.9631	High	4.09	4.76	1.398	24.969	0.955	High	4.09	4.77	2.152	38.43	0.9577	High	4.09	4.77	2.03	36.241	0.9379	High							4.09	4.76	2.183	38.976	0.9524	High	4.09
G_CD + Lipid	693	702	VRKRNEPNSY	3.93	3	7	3.87	4.34	1.464	29.887	0.9341	Medium	3.88	4.34	1.508	30.772	0.9315	Medium	3.87	4.33	1.407	28.72	0.9351	Medium	3.87	4.34	2.182	44.54	0.9213	Medium	3.88	4.34	2.057	41.981	0.8984	Medium							3.87	4.34	2.202	44.929	0.9342	Medium	3.87
G_CD + Lipid	707	725	RAEGKIKHCRVQQEGQTVM	5.03	4	17	4.96	5.7	1.292	10.855	0.9479	High	4.96	5.7	1.309	10.999	0.9379	High	4.95	5.69	1.242	10.435	0.9393	High	4.96	5.7	1.885	15.843	0.9479	High	4.96	5.7	1.778	14.943	0.9529	High							4.96	5.7	3.426	28.792	0.9401	High	4.96
G_CD + Lipid	723	731	TVMLGNSEF	11.22	1	7	11.16	11.3	0.968	19.757	0.7723	Medium	11.16	11.31	0.96	19.59	0.7689	Medium	11.17	11.31	0.924	18.86	0.7603	Medium	11.16	11.31	1.096	22.373	0.771	Medium	11.17	11.31	1.021	20.831	0.7462	Medium							11.16	11.3	1.511	30.833	0.7789	Medium	11.16
G_CD + Lipid	741	758	YEKHPLYRKMKLRYPINE	7.32	3	14	7.59	7.69	0.577	5.891	0.9375	High	7.59	7.69	0.595	6.073	0.9492	High	7.59	7.69	0.565	5.761	0.9397	High	7.6	7.7	1.076	10.978	0.9437	High	7.6	7.7	0.993	10.134	0.9372	High							7.59	7.7	1.685	17.198	0.9422	High	7.59
G_CD + Lipid	741	760	YEKHPLYRKMKLRYPINEEA	7.42	3	16	7.29	7.54	0.441	3.936	0.6305	Medium	7.3	7.54	0.58	5.179	0.8838	Medium	7.29	7.53	0.561	5.007	0.894	Medium	7.29	7.54	1.298	11.588	0.8891	Medium	7.29	7.54	1.246	11.126	0.784	Medium							7.29	7.54	2.335	20.849	0.8721	Medium	7.29
G_CD + Lipid	747	758	YRKMKLRYPINE	7.16	4	9	7.21	7.34	0.551	8.743	0.951	High	7.2	7.35	0.579	9.19	0.9449	High	7.2	7.34	0.535	8.499	0.9389	High	7.21	7.34	0.909	14.422	0.9484	High	7.21	7.35	0.901	14.303	0.9453	High							7.21	7.34	1.321	20.962	0.9443	High	7.21
G_CD + Lipid	761	774	LEKIGTAEPDYGAL	9.85	2	11	9.71	10.31	3.801	49.359	0.8749	Medium	9.71	10.32	3.888	50.496	0.8859	Medium	9.71	10.32	3.754	48.752	0.8366	Medium	9.71	10.31	5.464	70.967	0.8792	Medium	9.71	10.32	5.439	70.631	0.8199	Medium							9.71	10.31	5.572	72.359	0.8602	Medium	9.71
G_CD + Lipid	762	774	EKIGTAEPDYGAL	9.35	2	10	9.21	9.97	3.602	51.461	0.9035	High	9.22	9.97	3.697	52.815	0.9083	High	9.21	9.97	3.552	50.742	0.8818	Medium	9.22	9.97	4.927	70.386	0.9195	High	9.22	9.97	4.891	69.877	0.8729	Medium							9.22	9.97	5.052	72.173	0.8996	High	9.21
G_CD + Lipid	775	782	YEGRNPGF	7.69	1	5	7.55	8.02	2.515	71.863	0.9079	High	7.55	8.02	2.563	73.232	0.9119	High	7.55	8.02	2.446	69.873	0.8948	Medium	7.55	8.02	2.589	73.98	0.8995	High	7.56	8.03	2.489	71.121	0.8652	Medium							7.55	8.02	2.553	72.95	0.9038	High	7.55
G_CD + Lipid	783	792	YVEANPMPTF	11.57	1	6	11.16	12	3.156	75.131	0.9257	High	11.16	12	3.198	76.142	0.9319	High	11.17	12.01	3.1	73.816	0.8975	High	11.16	12	3.486	83.012	0.9236	High	11.17	12.01	3.459	82.349	0.9085	High							11.16	12	3.402	81.005	0.9179	High	11.16
G_CD + Lipid	783	801	YVEANPMPTFKCAVKALFD	13.3	3	15	13.36	13.46	3.834	36.512	0.8594	Medium	13.36	13.46	3.869	36.849	0.8797	High	13.36	13.46	3.75	35.718	0.8426	Medium	13.35	13.45	4.761	45.343	0.8422	Medium	13.36	13.46	4.411	42.01	0.7531	Medium							13.35	13.45	4.857	46.257	0.8526	Medium	13.35
G_CD + Lipid	793	800	KCAVKALF	9.3	1	6	9.16	9.43	0.086	2.053	0.9223	Medium	9.16	9.44	0.086	2.059	0.903	Medium	9.16	9.43	0.083	1.976	0.842	Medium	9.16	9.43	0.266	6.339	0.9122	Medium	9.17	9.44	0.256	6.097	0.8829	Medium							9.16	9.43	0.377	8.983	0.8961	Medium	9.16
G_CD + Lipid	793	801	KCAVKALFD	8.87	2	7	8.7	9.3	0.133	2.718	0.8817	Medium	8.7	9.3	0.135	2.759	0.8721	Medium	8.7	9.3	0.151	3.083	0.8352	Medium	8.7	9.3	0.319	6.503	0.8653	Medium	8.71	9.29	0.291	5.943	0.8651	Medium							8.7	9.3	0.68	13.873	0.8753	Medium	8.7
G_CD + Lipid	801	809	DYKAQREDE	4.2	2	7	4.18	4.56	0.763	15.578	0.9042	Medium	4.18	4.56	0.741	15.115	0.896	Medium	4.17	4.56	0.745	15.211	0.8927	Medium	4.18	4.56	1.764	36.001	0.872	Medium	4.18	4.56	1.622	33.106	0.8761	Medium							4.18	4.56	2.702	55.143	0.8521	Medium	4.18
G_CD + Lipid	801	810	DYKAQREDEL	7.06	2	8	6.92	7.33	0.782	13.968	0.9026	High	6.92	7.33	0.785	14.017	0.8967	High	6.92	7.32	0.758	13.533	0.8899	High	6.92	7.33	1.602	28.612	0.8778	Medium	6.93	7.33	1.594	28.469	0.8593	Medium							6.92	7.33	2.595	46.336	0.8936	Medium	6.92
G_CD + Lipid	802	809	YKAQREDE	3.88	2	6	3.76	4.06	0.663	15.774	0.9406	Medium	3.76	4.06	0.68	16.19	0.9327	Medium	3.75	4.06	0.653	15.558	0.9035	Medium	3.76	4.06	1.291	30.731	0.9304	Medium	3.76	4.06	1.232	29.329	0.9239	Medium							3.76	4.06	2.001	47.643	0.9383	Medium	3.76
G_CD + Lipid	802	810	YKAQREDEL	6.28	2	7	6.25	6.6	0.636	12.98	0.9225	Medium	6.25	6.6	0.648	13.222	0.8941	Medium	6.25	6.59	0.618	12.612	0.9141	Medium	6.25	6.6	1.149	23.441	0.8945	Medium	6.25	6.6	1.097	22.388	0.9019	Medium							6.25	6.6	1.824	37.216	0.893	Medium	6.25
G_CD + Lipid	802	811	YKAQREDELT	5.62	2	8	5.6	6.04	0.628	11.217	0.9169	Medium	5.6	6.04	0.677	12.084	0.8926	Medium	5.6	6.04	0.621	11.093	0.9388	High	5.61	6.04	1.178	21.044	0.9339	High	5.61	6.04	1.104	19.708	0.9236	Medium							5.6	6.04	1.876	33.496	0.8977	Medium	5.6
G_CD + Lipid	810	819	LTFTKSAIIQ	9.41	2	8	9.32	9.55	0.089	1.584	0.9362	Medium	9.32	9.55	0.086	1.541	0.9388	Medium	9.31	9.55	0.085	1.525	0.9329	Medium	9.32	9.55	0.413	7.377	0.9118	Medium	9.31	9.55	0.42	7.495	0.9293	Medium							9.32	9.55	1.225	21.878	0.8917	Medium	9.31
G_CD + Lipid	810	828	LTFTKSAIIQNVEKQDGGW	11	3	17	10.93	11.44	1.702	14.299	0.8592	High	10.93	11.44	1.736	14.589	0.8854	High	10.93	11.44	1.667	14.011	0.8811	High	10.93	11.44	2.8	23.528	0.8819	High	10.93	11.44	2.665	22.399	0.859	High							10.93	11.44	4.401	36.981	0.8695	Medium	10.93
G_CD + Lipid	811	819	TFTKSAIIQ	7.81	1	7	7.74	8.02	0.08	1.635	0.8674	Medium	7.74	8.02	0.067	1.358	0.8656	Medium	7.73	8.02	0.076	1.554	0.8331	Medium	7.74	8.02	0.389	7.945	0.8802	Medium	7.74	8.03	0.437	8.917	0.7902	Medium							7.74	8.02	1.079	22.019	0.8595	Medium	7.74
G_CD + Lipid	811	822	TFTKSAIIQNVE	8.74	2	10	8.75	8.82	0.08	1.149	0.78	Medium	8.75	8.82	0.172	2.463	0.8351	Medium	8.75	8.82	0.149	2.135	0.8469	Medium	8.75	8.82	0.64	9.146	0.8094	Medium	8.76	8.82	0.489	6.987	0.7938	Medium							8.75	8.82	1.838	26.258	0.7539	Medium	8.75
G_CD + Lipid	811	828	TFTKSAIIQNVEKQDGGW	10.4	3	16	10.3	10.81	1.707	15.242	0.9277	High	10.3	10.81	1.752	15.645	0.923	High	10.3	10.81	1.646	14.7	0.9284	High	10.3	10.81	2.768	24.712	0.9131	High	10.3	10.81	2.652	23.676	0.914	High							10.3	10.81	4.299	38.385	0.9016	High	10.3
G_CD + Lipid	812	820	FTKSAIIQN	6.83	1	7	6.73	6.94	0.023	0.477	0.8047	Medium	6.73	6.94	0.013	0.263	0.8488	Medium	6.73	6.94	0.063	1.286	0.82	Medium	6.73	6.94	0.448	9.137	0.8085	Medium	6.73	6.94	0.428	8.739	0.6795	Medium							6.73	6.94	1.224	24.975	0.7933	Medium	6.73
G_CD + Lipid	812	828	FTKSAIIQNVEKQDGGW	10.17	3	15	10.07	10.62	1.692	16.114	0.9379	High	10.07	10.62	1.707	16.254	0.9389	High	10.08	10.62	1.633	15.552	0.9369	High	10.07	10.62	2.702	25.735	0.9265	High	10.08	10.62	2.584	24.606	0.9225	High							10.07	10.62	4.157	39.593	0.9136	High	10.07
G_CD + Lipid	829	844	WRGDYGGKKQLWFPSN	9.74	3	13	9.71	10.18	1.066	11.717	0.929	High	9.71	10.18	1.084	11.915	0.9246	High	9.71	10.18	1.06	11.645	0.9243	High	9.71	10.18	1.45	15.933	0.9199	High	9.71	10.18	1.399	15.376	0.9337	High							9.71	10.18	1.674	18.395	0.9138	High	9.71
G_CD + Lipid	829	845	WRGDYGGKKQLWFPSNY	10.66	4	14	10.46	11.04	0.917	9.356	0.9529	High	10.46	11.04	0.945	9.638	0.9537	High	10.46	11.05	0.9	9.181	0.9527	High	10.46	11.05	1.273	12.99	0.945	High	10.46	11.05	1.211	12.357	0.9418	High							10.46	11.04	1.559	15.909	0.9284	High	10.46
G_CD + Lipid	849	860	MINPAILEPERE	10.22	2	8	10.16	10.27	3.22	57.508	0.6818	Medium	10.16	10.27	3.321	59.308	0.9224	High	10.17	10.28	3.197	57.085	0.8971	High	10.16	10.27	4.881	87.152	0.8964	High	10.17	10.28	4.925	87.941	0.8691	Medium							10.16	10.27	4.875	87.052	0.8968	High	10.16
G_CD + Lipid	849	862	MINPAILEPEREHL	10.28	3	10	9.81	10.75	3.469	49.56	0.938	High	9.81	10.75	3.563	50.893	0.9451	High	9.81	10.76	3.448	49.253	0.9188	High	9.81	10.75	5.036	71.944	0.9291	High	9.82	10.76	5.059	72.277	0.9122	High							9.81	10.75	4.991	71.302	0.9333	High	9.81
G_CD + Lipid	849	871	MINPAILEPEREHLDENSPLGDL	12.05	3	18	11.65	12.45	4.003	31.769	0.8917	Medium	11.65	12.46	4.162	33.03	0.8975	High	11.65	12.46	4.034	32.017	0.8781	Medium	11.65	12.46	6.219	49.356	0.8835	Medium	11.65	12.46	6.205	49.25	0.8687	Medium							11.65	12.45	7.212	57.24	0.8856	High	11.65
G_CD + Lipid	849	872	MINPAILEPEREHLDENSPLGDLL	13.09	3	19	12.99	13.11	3.692	27.756	0.95	High	12.99	13.11	3.8	28.568	0.9342	High	13	13.11	3.684	27.701	0.9337	High	12.99	13.11	5.834	43.861	0.9336	High	13	13.12	5.792	43.548	0.9177	High							12.99	13.11	7.113	53.478	0.9236	High	12.99
G_CD + Lipid	849	876	MINPAILEPEREHLDENSPLGDLLRGVL	14.06	4	23	13.69	14.26	2.907	18.057	0.921	High	13.68	14.26	3.068	19.057	0.9342	High	13.68	14.25	2.942	18.274	0.9344	High	13.68	14.25	5.204	32.324	0.9213	High	13.69	14.26	4.906	30.472	0.8234	Medium							13.68	14.25	7.295	45.313	0.8892	High	13.68
G_CD + Lipid	856	871	EPEREHLDENSPLGDL	10.34	3	13	10.28	10.35	1.575	17.309	0.8746	Medium	10.28	10.35	1.561	17.157	0.8877	Medium	10.29	10.35	1.484	16.303	0.8865	Medium	10.28	10.35	2.211	24.302	0.8629	Medium	10.29	10.35	2.237	24.579	0.8467	Medium							10.28	10.35	3.364	36.965	0.8389	Medium	10.28
G_CD + Lipid	856	876	EPEREHLDENSPLGDLLRGVL	13.81	3	18	13.76	13.92	0.748	5.94	0.9106	High	13.76	13.92	0.714	5.67	0.9312	High	13.76	13.92	0.76	6.032	0.93	High	13.76	13.92	1.566	12.43	0.9155	High	13.76	13.92	1.517	12.043	0.8581	Medium							13.76	13.92	3.664	29.081	0.9158	High	13.76
G_CD + Lipid	861	872	HLDENSPLGDLL	12.73	2	9	12.6	12.71	0.687	10.909	0.8631	Medium	12.6	12.72	0.662	10.515	0.8958	Medium	12.6	12.72	0.647	10.27	0.8808	Medium	12.6	12.72	1.258	19.972	0.8655	Medium	12.6	12.72	1.197	18.998	0.8751	Medium							12.6	12.72	2.544	40.374	0.8892	Medium	12.6
G_CD + Lipid	861	876	HLDENSPLGDLLRGVL	13.97	3	13	13.86	14.27	0.429	4.715	0.9156	High	13.86	14.26	0.416	4.57	0.9173	High	13.87	14.26	0.43	4.724	0.9052	High	13.86	14.26	1.125	12.365	0.8977	Medium	13.86	14.27	1.02	11.21	0.8609	Medium							13.87	14.26	3.337	36.67	0.9327	High	13.86
G_CD + Lipid	863	871	DENSPLGDL	11.52	1	6	11.3	11.77	0.538	12.814	0.7819	Medium	11.3	11.77	0.575	13.697	0.8	Medium	11.3	11.77	0.519	12.355	0.7827	Medium	11.3	11.77	1.147	27.308	0.7953	Medium	11.3	11.77	1.034	24.611	0.8348	Medium							11.3	11.77	2.116	50.369	0.777	Medium	11.3
G_CD + Lipid	863	872	DENSPLGDLL	13.35	1	7	13.25	13.44	0.747	15.235	0.8488	Medium	13.25	13.44	0.743	15.166	0.8412	Medium	13.26	13.44	0.736	15.019	0.8648	Medium	13.25	13.44	1.27	25.912	0.8747	Medium	13.26	13.44	1.154	23.542	0.8698	Medium							13.25	13.44	2.292	46.772	0.901	Medium	13.25
G_CD + Lipid	863	876	DENSPLGDLLRGVL	14.32	2	11	14.13	14.49	0.161	2.097	0.8325	Medium	14.13	14.49	0.253	3.289	0.8656	Medium	14.13	14.49	0.272	3.534	0.8683	Medium	14.13	14.49	0.934	12.133	0.8485	Medium	14.13	14.49	0.79	10.264	0.8166	Medium							14.13	14.49	3.141	40.795	0.8617	Medium	14.13
G_CD + Lipid	872	882	LRGVLDVPACQ	9.69	2	8	9.67	9.95	0.13	2.32	0.8695	Medium	9.67	9.95	0.116	2.075	0.8626	Medium	9.66	9.95	0.131	2.347	0.8494	Medium	9.67	9.95	0.565	10.086	0.7949	Medium	9.66	9.96	0.519	9.274	0.8492	Medium							9.67	9.95	1.34	23.934	0.8112	Medium	9.67
G_CD + Lipid	877	882	DVPACQ	5.3	1	3	5.1	5.66	0.049	2.345	0.9297	High	5.1	5.66	0.055	2.626	0.9388	High	5.1	5.66	0.054	2.577	0.9339	High	5.1	5.66	0.169	8.036	0.9143	High	5.1	5.67	0.179	8.514	0.9233	Medium							5.1	5.66	0.553	26.322	0.9188	High	5.1
G_CD + Lipid	883	894	IAIRPEGKNNRL	6.19	3	9	5.97	6.52	2.329	36.973	0.9514	High	5.97	6.52	2.406	38.191	0.9538	High	5.97	6.52	2.306	36.599	0.9369	High	5.97	6.52	3.32	52.694	0.9503	High	5.98	6.52	3.243	51.483	0.9327	High							5.97	6.52	3.827	60.751	0.9433	High	5.97
G_CD + Lipid	883	896	IAIRPEGKNNRLFV	8.61	4	11	8.77	8.84	2.022	26.263	0.9467	High	8.77	8.84	2.095	27.209	0.9345	High	8.77	8.83	1.989	25.828	0.9284	High	8.77	8.84	3.09	40.126	0.9286	High	8.77	8.84	3.028	39.321	0.8879	Medium							8.77	8.84	3.854	50.046	0.9264	High	8.77
G_CD + Lipid	898	906	SISMPSVAQ	8.93	1	6	8.94	9	1.928	45.902	0.8133	Medium	8.94	8.99	1.957	46.603	0.843	Medium	8.93	8.99	1.84	43.81	0.8161	Medium	8.94	9	2.601	61.923	0.8015	Medium	8.94	9	2.538	60.418	0.7751	Medium							8.94	9	2.897	68.986	0.7809	Medium	8.94
G_CD + Lipid	898	909	SISMPSVAQWSL	13.51	1	9	13.39	13.81	2.077	32.963	0.8255	Medium	13.39	13.81	2.152	34.156	0.8429	Medium	13.39	13.81	2.091	33.198	0.8302	Medium	13.39	13.81	3.498	55.527	0.8209	Medium	13.39	13.81	3.373	53.537	0.6674	Medium							13.39	13.81	3.891	61.762	0.8086	Medium	13.39
G_CD + Lipid	902	909	PSVAQWSL	12.36	1	6	12.11	12.55	1.594	37.959	0.9115	High	12.11	12.56	1.644	39.146	0.907	High	12.12	12.56	1.556	37.05	0.9029	High	12.11	12.56	2.987	71.11	0.8738	Medium	12.12	12.56	3.037	72.311	0.8446	Medium							12.11	12.56	3.2	76.193	0.8697	High	12.11
G_CD + Lipid	910	916	DVAADSQ	3.94	1	5	3.95	4.11	0.619	17.686	0.8753	Medium	3.95	4.11	0.612	17.476	0.8761	Medium	3.95	4.11	0.581	16.59	0.8811	Medium	3.95	4.11	1.158	33.091	0.8878	Medium	3.95	4.11	1.145	32.717	0.8215	Medium							3.95	4.11	1.548	44.224	0.8696	Medium	3.95
G_CD + Lipid	911	917	VAADSQE	3.88	1	5	3.98	4.05	0.822	23.499	0.7665	Medium	3.99	4.05	0.824	23.548	0.7905	Medium	3.98	4.05	0.773	22.084	0.8014	Medium	3.98	4.05	1.675	47.843	0.7634	Medium	3.98	4.05	1.582	45.209	0.7496	Medium							3.98	4.05	2.09	59.711	0.7823	Medium	3.98
G_CD + Lipid	917	921	EELQD	5.82	1	3	5.71	6.14	0.033	1.579	0.7845	Medium	5.7	6.14	0.033	1.56	0.8117	Medium	5.7	6.14	0.037	1.77	0.7802	Medium	5.71	6.14	0.037	1.738	0.8007	Medium	5.71	6.14	0.045	2.144	0.8182	Medium							5.71	6.14	0.072	3.413	0.8281	Medium	5.71
G_CD + Lipid	922	928	WVKKIRE	4.93	2	5	4.9	5.29	0.036	1.042	0.9608	Medium	4.9	5.29	0.027	0.785	0.9596	Medium	4.9	5.28	0.039	1.127	0.93	Medium	4.9	5.29	0.032	0.926	0.9527	Medium	4.9	5.29	0.034	0.972	0.9558	Medium							4.9	5.29	0.053	1.504	0.9419	Medium	4.9
G_CD + Lipid	922	934	WVKKIREVAQTAD	6.52	2	11	6.36	6.77	1.628	21.142	0.9398	Medium	6.36	6.77	1.679	21.802	0.9356	Medium	6.36	6.77	1.579	20.504	0.9285	Medium	6.36	6.77	2.567	33.335	0.9282	Medium	6.36	6.77	2.489	32.325	0.9053	Medium							6.36	6.77	3.137	40.735	0.9185	Medium	6.36
G_CD + Lipid	922	935	WVKKIREVAQTADA	6.85	2	12	6.88	7.04	2.121	25.248	0.8941	Medium	6.88	7.04	2.133	25.394	0.9227	Medium	6.88	7.04	2.017	24.015	0.9008	Medium	6.88	7.04	3.045	36.25	0.8814	Medium	6.88	7.04	2.969	35.345	0.8156	Medium							6.88	7.04	3.589	42.73	0.8829	Medium	6.88
G_CD + Lipid	929	935	VAQTADA	4.03	1	5	4.02	4.19	2.15	61.438	0.8129	Medium	4.02	4.2	2.18	62.275	0.8006	Medium	4.01	4.19	2.066	59.024	0.793	Medium	4.02	4.19	2.807	80.191	0.7999	Medium	4.02	4.19	2.777	79.333	0.7843	Medium							4.02	4.19	2.986	85.326	0.7929	Medium	4.02
G_CD + Lipid	929	937	VAQTADARL	6.67	2	7	6.55	6.72	3.577	72.999	0.8145	Medium	6.55	6.72	3.591	73.296	0.8587	Medium	6.54	6.72	3.501	71.446	0.8004	Medium	6.55	6.72	4.203	85.778	0.8564	Medium	6.55	6.72	4.199	85.685	0.8176	Medium							6.55	6.72	4.269	87.133	0.8312	Medium	6.54
G_CD + Lipid	938	942	TEGKM	3.89	1	3	3.91	4.18	1.7	80.946	0.8686	Medium	3.91	4.19	1.717	81.771	0.8634	Medium	3.9	4.18	1.612	76.755	0.8602	Medium	3.91	4.19	1.727	82.244	0.8686	Medium	3.91	4.19	1.687	80.318	0.8445	Medium							3.91	4.19	1.676	79.797	0.8747	Medium	3.91
G_CD + Lipid	938	953	TEGKMMERRKKIALEL	7.43	4	14	7.49	7.56	3.169	32.338	0.8651	Medium	7.49	7.56	3.163	32.277	0.8949	Medium	7.48	7.56	3.04	31.021	0.8744	Medium	7.49	7.56	4.046	41.29	0.9098	Medium	7.49	7.56	4.062	41.449	0.8488	Medium							7.49	7.56	4.314	44.025	0.8813	Medium	7.48
G_CD + Lipid	943	951	MERRKKIAL	4.84	2	7	4.86	5.18	2.063	42.094	0.8959	Medium	4.86	5.19	2.074	42.329	0.9169	Medium	4.85	5.18	1.978	40.372	0.8945	Medium	4.86	5.19	2.556	52.166	0.904	Medium	4.86	5.19	2.559	52.215	0.83	Medium							4.86	5.18	2.724	55.598	0.899	Medium	4.86
G_CD + Lipid	945	953	RRKKIALEL	7.11	3	7	7.07	7.34	1.187	24.232	0.8407	Medium	7.06	7.35	1.177	24.011	0.9002	Medium	7.06	7.34	1.147	23.414	0.8797	Medium	7.07	7.34	2.055	41.931	0.8922	Medium	7.07	7.35	2.028	41.381	0.8838	Medium							7.07	7.34	2.338	47.705	0.9077	Medium	7.07
G_CD + Lipid	957	968	VVYCRPVPFDEE	10.06	2	8	9.78	10.26	1.037	18.518	0.8628	Medium	9.78	10.26	1.013	18.091	0.8417	Medium	9.77	10.26	0.994	17.747	0.8508	Medium	9.78	10.26	1.354	24.182	0.8472	Medium	9.78	10.26	1.309	23.376	0.8781	Medium							9.78	10.26	1.624	29.007	0.8712	Medium	9.78
G_CD + Lipid	957	976	VVYCRPVPFDEEKIGTERAC	9.15	3	16	9.17	9.27	2.602	23.23	0.9188	High	9.17	9.28	2.694	24.054	0.9104	High	9.17	9.27	2.61	23.307	0.9174	High	9.17	9.27	4.267	38.095	0.8983	High	9.18	9.28	3.687	32.922	0.8731	Medium							9.17	9.27	5.338	47.662	0.8662	Medium	9.17
G_CD + Lipid	959	967	YCRPVPFDE	9.14	2	5	9	9.11	0.937	26.763	0.8737	Medium	9	9.1	0.956	27.325	0.914	Medium	9	9.1	0.909	25.982	0.8836	Medium	9.01	9.11	1.063	30.373	0.8639	Medium	9.01	9.11	0.98	28.005	0.8828	Medium							9.01	9.11	1.069	30.536	0.8434	Medium	9
G_CD + Lipid	968	976	EKIGTERAC	4.72	2	7	4.81	4.85	2.114	43.144	0.9129	Medium	4.81	4.85	2.076	42.375	0.9286	High	4.8	4.85	2.004	40.898	0.9187	Medium	4.81	4.85	3.345	68.268	0.9221	Medium	4.81	4.85	3.358	68.521	0.8606	Medium							4.81	4.85	3.8	77.541	0.9199	Medium	4.81
G_CD + Lipid	977	1003	YRDMSSFPETKAEKYVNKAKGKKFLQY	8.44	5	24	8.11	8.81	1.124	6.691	0.9053	High	8.1	8.81	1.197	7.124	0.915	High	8.1	8.81	1.111	6.612	0.9177	High	8.11	8.81	2.636	15.693	0.9165	High	8.11	8.82	2.489	14.818	0.9138	High							8.11	8.81	4.065	24.199	0.9044	High	8.11
G_CD + Lipid	978	983	RDMSSF	7.96	1	4	7.93	8.02	0.291	10.397	0.7084	Medium	7.93	8.02	0.31	11.063	0.7549	Medium	7.93	8.02	0.285	10.173	0.745	Medium	7.93	8.02	0.546	19.518	0.7568	Medium	7.93	8.03	0.453	16.19	0.6392	Medium							7.93	8.02	0.644	23.002	0.6715	Medium	7.93
G_CD + Lipid	978	1008	RDMSSFPETKAEKYVNKAKGKKFLQYNRLQL	8.77	4	28	8.58	9.11	0.995	5.076	0.9489	High	8.59	9.11	1.042	5.315	0.9466	High	8.58	9.11	1.014	5.171	0.9447	High	8.59	9.11	2.362	12.05	0.9376	High	8.59	9.12	2.148	10.957	0.9022	Medium							8.59	9.11	3.536	18.043	0.9245	High	8.58
G_CD + Lipid	984	1008	PETKAEKYVNKAKGKKFLQYNRLQL	8.01	4	23	7.96	8.06	0.807	5.014	0.8382	Medium	7.95	8.05	0.899	5.584	0.9125	High	7.95	8.05	0.813	5.05	0.9012	High	7.96	8.06	1.929	11.983	0.9064	High	7.96	8.06	1.951	12.118	0.8376	Medium							7.96	8.06	3.311	20.563	0.7986	Medium	7.96
G_CD + Lipid	987	1003	KAEKYVNKAKGKKFLQY	5.89	4	15	5.92	6.02	0.495	4.714	0.8633	Medium	5.91	6.02	0.488	4.643	0.8936	Medium	5.91	6.02	0.415	3.951	0.9097	Medium	5.92	6.03	1.278	12.168	0.8828	Medium	5.92	6.03	1.278	12.175	0.8413	Medium							5.92	6.02	2.257	21.491	0.8683	Medium	5.92
G_CD + Lipid	1009	1018	SRIYPKGQRL	5.55	3	7	5.47	6.02	0.73	14.892	0.9639	High	5.47	6.02	0.766	15.641	0.9592	High	5.47	6.02	0.71	14.487	0.9351	High	5.47	6.03	1.292	26.365	0.96	High	5.47	6.03	1.236	25.224	0.9623	High							5.47	6.02	2.115	43.154	0.9336	High	5.47
G_CD + Lipid	1009	1022	SRIYPKGQRLDSSN	5.04	3	11	5.04	5.17	0.923	11.981	0.9297	Medium	5.04	5.17	0.924	12.006	0.9401	Medium	5.04	5.16	0.858	11.147	0.9374	Medium	5.04	5.17	1.642	21.323	0.8945	Medium	5.04	5.17	1.704	22.129	0.9127	Medium							5.04	5.17	3.247	42.171	0.7014	Medium	5.04
G_CD + Lipid	1009	1029	SRIYPKGQRLDSSNYDPLPMW	11.46	4	16	11.2	11.89	0.478	4.268	0.9072	High	11.21	11.89	0.543	4.848	0.907	High	11.21	11.9	0.502	4.478	0.9057	High	11.2	11.89	0.994	8.872	0.897	High	11.21	11.9	1.006	8.978	0.9066	High							11.2	11.89	1.923	17.17	0.9094	High	11.2
G_CD + Lipid	1009	1032	SRIYPKGQRLDSSNYDPLPMWICG	12.63	4	19	12.38	12.88	0.388	2.914	0.8507	Medium	12.38	12.88	0.434	3.264	0.8857	Medium	12.38	12.89	0.434	3.266	0.8662	Medium	12.38	12.88	0.87	6.539	0.8113	Medium	12.39	12.89	0.745	5.598	0.777	Medium							12.38	12.88	1.61	12.105	0.7866	Medium	12.38
G_CD + Lipid	1009	1035	SRIYPKGQRLDSSNYDPLPMWICGSQL	13.04	3	22	12.73	13.33	0.405	2.632	0.9399	High	12.73	13.34	0.404	2.622	0.9366	High	12.74	13.34	0.41	2.66	0.9496	High	12.73	13.34	0.823	5.345	0.9436	High	12.74	13.34	0.678	4.401	0.9173	High							12.73	13.34	1.486	9.65	0.9458	High	12.73
G_CD + Lipid	1012	1018	YPKGQRL	5.61	2	5	5.6	5.73	0.585	16.727	0.8082	Medium	5.6	5.73	0.638	18.218	0.8124	Medium	5.6	5.73	0.604	17.246	0.8286	Medium	5.61	5.73	1.088	31.087	0.8064	Medium	5.61	5.73	1.025	29.284	0.8134	Medium							5.6	5.73	1.845	52.711	0.7739	Medium	5.6
G_CD + Lipid	1019	1028	DSSNYDPLPM	11.16	1	6	11.12	11.35	0.091	2.171	0.8023	Medium	11.12	11.36	0.065	1.548	0.833	Medium	11.12	11.36	0.077	1.833	0.819	Medium	11.12	11.36	0.135	3.222	0.8134	Medium	11.13	11.36	0.14	3.345	0.7646	Medium							11.12	11.36	0.226	5.376	0.7832	Medium	11.12
G_CD + Lipid	1019	1029	DSSNYDPLPMW	14.02	1	7	13.91	14.25	0.029	0.591	0.895	Medium	13.9	14.25	0.016	0.325	0.9052	Medium	13.9	14.25	0.05	1.028	0.9109	Medium	13.9	14.24	0.065	1.33	0.8834	Medium	13.91	14.25	0.008	0.167	0.8667	Medium							13.9	14.24	0.123	2.509	0.8895	Medium	13.91
G_CD + Lipid	1029	1035	WICGSQL	11.9	1	5	11.84	11.93	0.076	2.184	0.8017	Medium	11.84	11.93	0.079	2.25	0.8016	Medium	11.85	11.94	0.053	1.511	0.8077	Medium	11.84	11.94	0.058	1.661	0.8034	Medium	11.85	11.94	0.077	2.205	0.7615	Medium							11.84	11.93	0.044	1.269	0.789	Medium	11.84
G_CD + Lipid	1030	1035	ICGSQL	8.33	1	4	8.33	8.53	0.039	1.401	0.8401	Medium	8.34	8.53	0.039	1.406	0.8324	Medium	8.33	8.52	0.02	0.718	0.8316	Medium	8.33	8.53	0.012	0.446	0.8206	Medium	8.34	8.53	0.039	1.376	0.8302	Medium							8.33	8.53	0.046	1.636	0.8411	Medium	8.33
G_CD + Lipid	1036	1049	VALNFQTPDKPMQM	10.61	2	10	10.35	10.95	0.242	3.459	0.9453	High	10.35	10.95	0.283	4.043	0.9431	High	10.35	10.96	0.248	3.539	0.9366	High	10.35	10.95	0.544	7.77	0.9451	High	10.35	10.96	0.529	7.556	0.9499	High							10.35	10.95	0.548	7.835	0.9498	High	10.35
G_CD + Lipid	1039	1049	NFQTPDKPMQM	9.19	2	7	9.2	9.4	0.271	5.529	0.9031	High	9.19	9.4	0.268	5.463	0.9058	High	9.19	9.4	0.279	5.703	0.9041	High	9.2	9.4	0.504	10.276	0.8325	Medium	9.2	9.4	0.58	11.838	0.9121	High							9.2	9.4	0.564	11.516	0.8813	High	9.2
G_CD + Lipid	1050	1054	NQALF	10.82	1	3	10.73	10.99	0.04	1.889	0.8678	Medium	10.73	10.98	0.034	1.639	0.8452	Medium	10.74	10.99	0.038	1.82	0.8453	Medium	10.73	10.99	0.047	2.26	0.8452	Medium	10.74	10.99	0.048	2.273	0.8388	Medium							10.73	10.99	0.028	1.351	0.8664	Medium	10.73
G_CD + Lipid	1054	1068	FMAGGHCGYVLQPST	9.52	2	12	9.47	9.66	1.106	13.171	0.8771	Medium	9.48	9.66	1.09	12.982	0.8504	Medium	9.47	9.66	1.049	12.49	0.8688	Medium	9.48	9.66	1.41	16.781	0.8555	Medium	9.47	9.66	1.3	15.474	0.8661	Medium							9.48	9.66	2.156	25.669	0.8623	Medium	9.47
G_CD + Lipid	1055	1062	MAGGHCGY	6.2	1	6	6.1	6.38	0.127	3.014	0.8234	Medium	6.1	6.38	0.099	2.35	0.8574	Medium	6.1	6.37	0.11	2.627	0.8257	Medium	6.1	6.38	0.192	4.574	0.8313	Medium	6.1	6.38	0.203	4.834	0.7959	Medium							6.1	6.38	0.739	17.606	0.8274	Medium	6.1
G_CD + Lipid	1055	1068	MAGGHCGYVLQPST	8.45	2	11	8.38	8.53	1.325	17.204	0.7218	Medium	8.39	8.53	1.288	16.725	0.7577	Medium	8.38	8.52	1.288	16.731	0.7525	Medium	8.38	8.53	1.374	17.843	0.7592	Medium	8.39	8.53	1.403	18.223	0.7257	Medium							8.38	8.53	1.842	23.92	0.7012	Medium	8.38
G_CD + Lipid	1063	1068	VLQPST	5.66	1	3	5.59	5.69	1.316	62.689	0.8241	Medium	5.59	5.69	1.327	63.19	0.8219	Medium	5.58	5.69	1.198	57.026	0.8152	Medium	5.59	5.69	1.284	61.14	0.827	Medium	5.59	5.69	1.248	59.444	0.8146	Medium							5.59	5.69	1.349	64.247	0.8278	Medium	5.59
G_CD + Lipid	1063	1069	VLQPSTM	7.96	1	4	7.79	8.2	1.264	45.147	0.8826	Medium	7.79	8.19	1.261	45.039	0.8748	Medium	7.78	8.2	1.188	42.421	0.8658	Medium	7.79	8.2	1.252	44.715	0.8799	Medium	7.79	8.2	1.232	44.017	0.8852	Medium							7.79	8.2	1.253	44.754	0.8948	Medium	7.79
G_CD + Lipid	1063	1082	VLQPSTMRDEAFDPFDKSSL	11.57	3	16	11.33	11.83	1.553	13.866	0.9053	Medium	11.33	11.83	1.591	14.202	0.902	Medium	11.33	11.84	1.477	13.188	0.9038	Medium	11.33	11.83	2.534	22.626	0.8952	Medium	11.34	11.84	2.553	22.797	0.9013	Medium							11.33	11.83	2.925	26.116	0.9079	Medium	11.33
G_CD + Lipid	1069	1082	MRDEAFDPFDKSSL	11.2	3	11	10.99	11.34	0.733	9.513	0.9438	High	10.98	11.34	0.772	10.021	0.9257	High	10.99	11.34	0.723	9.392	0.9343	High	10.99	11.34	1.615	20.969	0.9302	High	10.99	11.34	1.673	21.733	0.9205	High							10.99	11.34	2.001	25.982	0.9302	High	10.99
G_CD + Lipid	1070	1082	RDEAFDPFDKSSL	10.93	2	10	10.73	11.14	0.689	9.843	0.9467	High	10.73	11.14	0.704	10.062	0.9492	High	10.73	11.15	0.687	9.819	0.9336	High	10.73	11.15	1.56	22.283	0.9407	High	10.73	11.15	1.547	22.095	0.9357	High							10.73	11.15	1.905	27.217	0.9422	High	10.73
G_CD + Lipid	1083	1090	RGLEPCVI	10.13	1	5	10.05	10.19	0.526	15.033	0.8378	Medium	10.05	10.19	0.468	13.36	0.8593	Medium	10.04	10.19	0.401	11.47	0.8256	Medium	10.05	10.19	1.122	32.045	0.8325	Medium	10.05	10.19	1.084	30.965	0.7891	Medium							10.05	10.19	1.174	33.54	0.8151	Medium	10.05
G_CD + Lipid	1083	1091	RGLEPCVIC	10.28	2	6	10.14	10.49	0.436	10.369	0.9062	High	10.14	10.49	0.47	11.194	0.9102	High	10.14	10.5	0.426	10.151	0.9084	High	10.14	10.49	1.118	26.615	0.8857	Medium	10.14	10.5	1.067	25.405	0.9006	Medium							10.14	10.49	1.171	27.883	0.8902	Medium	10.14
G_CD + Lipid	1092	1106	IEVLGARHLPKNGRG	6.2	4	12	6.09	6.28	1.062	12.643	0.8721	Medium	6.09	6.27	1.095	13.04	0.883	Medium	6.09	6.27	1.032	12.288	0.9038	Medium	6.09	6.28	1.638	19.501	0.8861	Medium	6.09	6.28	1.634	19.45	0.8514	Medium							6.09	6.28	1.959	23.319	0.8531	Medium	6.09
G_CD + Lipid	1092	1109	IEVLGARHLPKNGRGIVC	7.9	4	15	7.93	8.02	1.042	9.927	0.9239	High	7.93	8.02	1.058	10.08	0.9267	High	7.93	8.02	1	9.525	0.934	High	7.93	8.02	1.61	15.332	0.9223	High	7.93	8.03	1.606	15.295	0.9339	High							7.93	8.02	2.219	21.136	0.928	High	7.93
G_CD + Lipid	1092	1115	IEVLGARHLPKNGRGIVCPFVEIE	10.78	5	20	10.92	11.02	0.685	4.894	0.9271	High	10.92	11.02	0.709	5.064	0.9053	High	10.92	11.02	0.709	5.064	0.909	High	10.92	11.02	1.114	7.958	0.8897	High	10.92	11.02	1.08	7.712	0.9114	High							10.92	11.02	1.519	10.852	0.9193	High	10.92
G_CD + Lipid	1110	1115	PFVEIE	10.67	1	4	10.69	10.75	0.056	1.987	0.8323	Medium	10.69	10.75	0.023	0.836	0.85	Medium	10.7	10.76	0.042	1.516	0.833	Medium	10.69	10.75	0.053	1.896	0.8186	Medium	10.7	10.76	0.016	0.585	0.7756	Medium							10.69	10.75	0.025	0.892	0.737	Medium	10.69
G_CD + Lipid	1114	1120	IEVAGAE	6.46	1	5	6.41	6.67	0.273	7.807	0.9047	Medium	6.41	6.67	0.284	8.105	0.9255	Medium	6.41	6.67	0.269	7.678	0.9077	Medium	6.41	6.67	0.567	16.19	0.9199	Medium	6.41	6.67	0.561	16.021	0.858	Medium							6.41	6.67	0.638	18.228	0.8617	Medium	6.41
G_CD + Lipid	1114	1121	IEVAGAEY	9.14	1	6	9.14	9.21	0.348	8.275	0.8979	High	9.14	9.21	0.339	8.077	0.9141	High	9.14	9.2	0.294	7.009	0.9082	High	9.14	9.21	0.939	22.363	0.8958	High	9.14	9.21	0.922	21.954	0.8926	High							9.14	9.21	1.217	28.986	0.8921	High	9.14
G_CD + Lipid	1114	1130	IEVAGAEYDSTKQKTEF	8.6	3	15	8.64	8.94	0.55	5.24	0.9528	High	8.64	8.94	0.567	5.396	0.9538	High	8.64	8.93	0.551	5.246	0.9475	High	8.64	8.94	1.91	18.189	0.9353	High	8.65	8.94	1.788	17.033	0.9314	High							8.64	8.94	3.249	30.946	0.9239	High	8.64
G_CD + Lipid	1122	1130	DSTKQKTEF	6.08	2	7	6.02	6.17	0.292	5.969	0.9174	Medium	6.01	6.16	0.316	6.443	0.9269	Medium	6.01	6.16	0.29	5.918	0.8961	Medium	6.02	6.17	1.104	22.531	0.9151	Medium	6.02	6.17	1.129	23.032	0.9	Medium							6.02	6.17	2.225	45.403	0.909	Medium	6.02
G_CD + Lipid	1131	1137	VVDNGLN	5.92	1	5	5.94	6.07	0.069	1.966	0.9309	High	5.94	6.06	0.069	1.97	0.9301	High	5.94	6.06	0.083	2.383	0.9266	High	5.94	6.07	0.07	2.003	0.9293	High	5.94	6.07	0.072	2.069	0.9359	High							5.94	6.07	0.091	2.606	0.9267	High	5.94
G_CD + Lipid	1131	1154	VVDNGLNPVWPAKPFHFQISNPEF	12.65	2	18	12.66	12.81	0.407	3.23	0.851	Medium	12.67	12.82	0.519	4.116	0.8482	Medium	12.67	12.82	0.481	3.814	0.8506	Medium	12.67	12.82	1.133	8.994	0.8113	Medium	12.67	12.82	1.031	8.185	0.7041	Medium							12.66	12.82	1.609	12.771	0.8294	Medium	12.66
G_CD + Lipid	1131	1155	VVDNGLNPVWPAKPFHFQISNPEFA	12.47	3	19	12.26	12.4	0.51	3.836	0.7898	Medium	12.27	12.4	0.525	3.946	0.8275	Medium	12.27	12.4	0.527	3.959	0.7966	Medium	12.26	12.4	1.137	8.545	0.7759	Medium	12.27	12.4	1	7.515	0.8345	Medium							12.26	12.4	1.747	13.136	0.7836	Medium	12.26
G_CD + Lipid	1131	1156	VVDNGLNPVWPAKPFHFQISNPEFAF	13.64	3	20	13.19	13.82	0.432	3.088	0.8854	Medium	13.19	13.82	0.543	3.877	0.9041	High	13.2	13.82	0.481	3.432	0.9068	High	13.19	13.81	1.103	7.88	0.8941	High	13.2	13.82	0.847	6.047	0.8778	Medium							13.19	13.81	1.536	10.975	0.8998	Medium	13.19
G_CD + Lipid	1138	1147	PVWPAKPFHF	11.46	3	6	11.38	11.56	0.462	10.992	0.9314	High	11.38	11.57	0.474	11.292	0.9279	High	11.38	11.57	0.453	10.793	0.9337	High	11.38	11.57	0.799	19.019	0.9125	High	11.39	11.57	0.826	19.678	0.917	High							11.38	11.57	1.23	29.291	0.9211	High	11.38
G_CD + Lipid	1138	1154	PVWPAKPFHFQISNPEF	12.2	3	12	12.17	12.28	0.53	6.305	0.9471	High	12.17	12.28	0.533	6.348	0.9416	High	12.17	12.28	0.523	6.221	0.9444	High	12.17	12.28	1.11	13.214	0.9349	High	12.18	12.28	1.086	12.929	0.9453	High							12.17	12.28	1.638	19.497	0.9497	High	12.17
G_CD + Lipid	1138	1156	PVWPAKPFHFQISNPEFAF	13.14	3	14	12.94	13.53	0.481	4.911	0.9233	High	12.94	13.53	0.497	5.076	0.9368	High	12.95	13.52	0.456	4.655	0.9309	High	12.94	13.52	1.06	10.82	0.9169	Medium	12.95	13.53	0.978	9.983	0.9079	Medium							12.94	13.52	1.568	16.001	0.9353	High	12.94
G_CD + Lipid	1148	1154	QISNPEF	9.46	1	4	9.31	9.79	0.05	1.78	0.9086	High	9.31	9.8	0.053	1.887	0.8943	High	9.3	9.79	0.057	2.023	0.8973	High	9.31	9.79	0.07	2.506	0.9039	High	9.3	9.8	0.08	2.875	0.8961	High							9.31	9.79	0.289	10.32	0.9002	High	9.31
G_CD + Lipid	1148	1155	QISNPEFA	8.93	1	5	8.78	8.89	0.057	1.619	0.8696	Medium	8.78	8.89	0.062	1.765	0.8641	Medium	8.77	8.88	0.062	1.765	0.8642	Medium	8.78	8.89	0.079	2.251	0.8486	Medium	8.78	8.89	0.069	1.971	0.8632	Medium							8.78	8.89	0.313	8.934	0.8481	Medium	8.78
G_CD + Lipid	1148	1156	QISNPEFAF	12.3	1	6	12.16	12.66	0.033	0.795	0.9308	High	12.16	12.67	0.026	0.615	0.9185	High	12.17	12.67	0.047	1.125	0.9024	High	12.16	12.67	0.055	1.299	0.9081	High	12.17	12.67	0.08	1.901	0.8962	Medium							12.16	12.66	0.261	6.209	0.9121	High	12.16
G_CD + Lipid	1158	1166	RFVVYEEDM	10.23	2	7	10.18	10.33	0.239	4.877	0.7563	Medium	10.18	10.33	0.232	4.726	0.7753	Medium	10.18	10.34	0.224	4.581	0.7434	Medium	10.18	10.33	0.571	11.645	0.7256	Medium	10.18	10.34	0.561	11.45	0.688	Medium							10.18	10.33	0.547	11.163	0.7212	Medium	10.18
G_CD + Lipid	1160	1166	VVYEEDM	8.78	1	5	8.77	8.89	0.261	7.463	0.9302	High	8.77	8.89	0.266	7.602	0.9333	High	8.77	8.88	0.251	7.161	0.93	High	8.77	8.89	0.602	17.205	0.9347	High	8.77	8.89	0.596	17.027	0.8995	High							8.77	8.89	0.622	17.779	0.926	High	8.77
G_CD + Lipid	1167	1172	FSDQNF	9.57	1	4	9.42	9.84	0.683	24.38	0.9236	Medium	9.42	9.84	0.686	24.503	0.9205	Medium	9.41	9.83	0.681	24.33	0.8924	Medium	9.42	9.84	0.883	31.538	0.8969	Medium	9.42	9.84	0.842	30.083	0.9018	Medium							9.42	9.84	1.271	45.38	0.9013	Medium	9.42
G_CD + Lipid	1167	1199	FSDQNFLAQATFPVKGLKTGYRAVPLKNNYSED	10.72	5	29	10.56	10.67	0.816	4.018	0.8699	Medium	10.56	10.68	0.793	3.904	0.8834	Medium	10.56	10.68	0.718	3.539	0.89	Medium	10.56	10.68	1.34	6.602	0.8889	Medium	10.56	10.68	1.276	6.288	0.8867	Medium							10.56	10.68	2.304	11.349	0.8433	Medium	10.56
G_CD + Lipid	1173	1178	LAQATF	9.08	1	4	9.05	9.19	0.052	1.845	0.8934	Medium	9.04	9.19	0.049	1.752	0.9032	Medium	9.04	9.19	0.034	1.22	0.8991	Medium	9.05	9.19	0.067	2.408	0.9006	Medium	9.05	9.19	0.081	2.903	0.8843	Medium							9.05	9.19	0.206	7.371	0.8644	Medium	9.05
G_CD + Lipid	1173	1196	LAQATFPVKGLKTGYRAVPLKNNY	8.62	4	20	8.61	8.76	0.189	1.347	0.8295	Medium	8.61	8.76	0.201	1.438	0.8244	Medium	8.61	8.76	0.199	1.424	0.8164	Medium	8.61	8.76	0.694	4.958	0.8586	Medium	8.61	8.77	0.626	4.473	0.8204	Medium							8.61	8.76	1.298	9.273	0.8047	Medium	8.61
G_CD + Lipid	1173	1199	LAQATFPVKGLKTGYRAVPLKNNYSED	8.55	5	23	8.37	9.06	0.166	1.028	0.9492	High	8.37	9.06	0.175	1.084	0.9407	High	8.36	9.06	0.168	1.043	0.951	High	8.37	9.06	0.629	3.905	0.9417	High	8.37	9.07	0.627	3.896	0.9484	High							8.37	9.06	1.369	8.505	0.9444	High	8.37
G_CD + Lipid	1174	1199	AQATFPVKGLKTGYRAVPLKNNYSED	8.18	4	22	8.14	8.24	0.207	1.345	0.8747	High	8.14	8.24	0.216	1.401	0.8707	High	8.14	8.24	0.217	1.412	0.8874	High	8.14	8.24	0.703	4.563	0.8709	High	8.14	8.24	0.735	4.771	0.857	Medium							8.14	8.24	1.51	9.805	0.8307	Medium	8.14
G_CD + Lipid	1176	1199	ATFPVKGLKTGYRAVPLKNNYSED	8.12	4	20	8	8.11	0.354	2.526	0.864	Medium	7.99	8.11	0.231	1.651	0.8894	High	7.99	8.11	0.324	2.318	0.879	Medium	8	8.12	0.732	5.228	0.8732	Medium	8	8.12	0.736	5.259	0.8396	Medium							8	8.12	1.576	11.255	0.7533	Medium	8
G_CD + Lipid	1179	1187	PVKGLKTGY	6.03	2	7	6.05	6.22	0.082	1.682	0.9152	Medium	6.05	6.21	0.11	2.252	0.8977	Medium	6.05	6.21	0.107	2.18	0.8881	Medium	6.05	6.22	0.497	10.146	0.869	Medium	6.05	6.22	0.437	8.927	0.8717	Medium							6.05	6.22	1.086	22.16	0.8634	Medium	6.05
G_CD + Lipid	1179	1196	PVKGLKTGYRAVPLKNNY	6.81	4	15	6.74	6.81	0.043	0.413	0.6412	Medium	6.74	6.81	0.131	1.247	0.8892	Medium	6.73	6.81	0.21	2.003	0.7736	Medium	6.74	6.81	0.604	5.757	0.7686	Medium	6.74	6.82	0.638	6.081	0.6739	Medium							6.74	6.81	1.008	9.598	0.7235	Medium	6.74
G_CD + Lipid	1188	1199	RAVPLKNNYSED	5.77	3	9	5.63	6.07	0.117	1.856	0.958	High	5.63	6.07	0.118	1.871	0.9504	High	5.63	6.07	0.141	2.245	0.9305	High	5.63	6.08	0.407	6.46	0.9528	High	5.63	6.08	0.417	6.619	0.9456	High							5.63	6.08	0.712	11.296	0.9546	High	5.63
H_CD + FGFR + Lipid	26	33	CRSLEVGT	6.68	2	6	6.55	6.93	0.48	11.44	0.82	Medium	6.56	6.93	0.472	11.239	0.8391	Medium	6.55	6.93	0.509	12.109	0.8286	Medium	6.55	6.93	1.119	26.641	0.8202	Medium	6.55	6.93	1.083	25.776	0.8227	Medium	6.55	6.93	1.063	25.31	0.827	Medium	6.55	6.93	2.488	59.229	0.7743	Medium	6.55
H_CD + FGFR + Lipid	26	35	CRSLEVGTVM	9.41	2	8	9.3	9.35	0.425	7.581	0.8979	Medium	9.3	9.35	0.442	7.888	0.858	Medium	9.3	9.35	0.433	7.731	0.8838	Medium	9.3	9.35	1.36	24.281	0.8805	Medium	9.3	9.35	1.32	23.577	0.8645	Medium	9.3	9.35	1.343	23.98	0.8716	Medium	9.3	9.35	3.019	53.902	0.8859	Medium	9.3
H_CD + FGFR + Lipid	33	37	TVMTL	10.28	1	3	10.2	10.24	0.083	3.963	0.8338	Medium	10.21	10.24	0.077	3.685	0.8382	Medium	10.2	10.24	0.08	3.813	0.8577	Medium	10.21	10.24	0.057	2.736	0.845	Medium	10.2	10.24	0.081	3.875	0.8256	Medium	10.21	10.24	0.089	4.22	0.8227	Medium	10.2	10.24	0.085	4.047	0.8233	Medium	10.2
H_CD + FGFR + Lipid	37	54	LFYSKKSQRPERKTFQVK	6.62	5	15	6.54	7	0.742	7.068	0.9353	Medium	6.54	6.99	0.773	7.367	0.918	High	6.54	7	0.767	7.306	0.9151	High	6.54	6.99	1.756	16.721	0.939	High	6.54	7	1.637	15.587	0.9114	High	6.55	7	1.6	15.238	0.9283	High	6.54	7	2.016	19.199	0.9403	High	6.54
H_CD + FGFR + Lipid	38	52	FYSKKSQRPERKTFQ	4.22	3	12	4.23	4.68	1.368	16.281	0.9521	High	4.23	4.68	1.365	16.252	0.9596	High	4.23	4.68	1.356	16.144	0.9558	High	4.23	4.68	2.31	27.502	0.9587	High	4.23	4.68	2.098	24.981	0.962	High	4.23	4.68	2.069	24.63	0.9471	High	4.23	4.68	2.583	30.745	0.9589	High	4.23
H_CD + FGFR + Lipid	38	55	FYSKKSQRPERKTFQVKL	6.68	4	15	6.53	7.03	0.733	6.981	0.9276	Medium	6.52	7.03	0.77	7.337	0.9189	Medium	6.53	7.03	0.77	7.335	0.9182	Medium	6.52	7.03	1.734	16.516	0.9111	Medium	6.53	7.03	1.618	15.413	0.9087	Medium	6.53	7.03	1.591	15.152	0.9209	Medium	6.53	7.03	2.003	19.076	0.9264	Medium	6.53
H_CD + FGFR + Lipid	53	57	VKLET	5.86	1	3	5.89	5.98	0.813	38.726	0.9069	Medium	5.89	5.98	0.843	40.151	0.8962	Medium	5.89	5.98	0.825	39.265	0.9409	Medium	5.89	5.98	1.744	83.036	0.9275	Medium	5.89	5.98	1.715	81.689	0.9284	Medium	5.89	5.98	1.701	81.019	0.9281	Medium	5.89	5.98	1.907	90.829	0.9135	Medium	5.89
H_CD + FGFR + Lipid	56	74	ETRQITWSRGADKIEGSID	8.66	4	17	8.61	9.04	2.167	18.208	0.8844	Medium	8.61	9.04	2.234	18.774	0.8905	Medium	8.61	9.04	2.248	18.89	0.8962	Medium	8.61	9.04	3.489	29.316	0.8916	Medium	8.61	9.04	3.402	28.591	0.8877	Medium	8.61	9.04	3.399	28.559	0.8815	Medium	8.61	9.04	4.831	40.6	0.8734	Medium	8.61
H_CD + FGFR + Lipid	58	74	RQITWSRGADKIEGSID	8.44	2	15	8.25	8.71	2.034	19.369	0.9083	High	8.25	8.71	2.094	19.939	0.882	High	8.25	8.71	2.149	20.464	0.8987	High	8.25	8.71	3.356	31.966	0.8966	High	8.25	8.71	3.224	30.709	0.8986	High	8.25	8.71	3.239	30.848	0.9014	High	8.25	8.71	4.713	44.889	0.8704	Medium	8.25
H_CD + FGFR + Lipid	75	89	IREIKEIRPGKTSRD	4.77	4	12	4.71	5.2	0.619	7.373	0.9508	High	4.71	5.2	0.619	7.366	0.9504	High	4.7	5.2	0.618	7.352	0.9563	High	4.7	5.2	1.537	18.301	0.9484	High	4.71	5.2	1.42	16.911	0.953	High	4.71	5.2	1.396	16.619	0.9511	High	4.7	5.2	2.043	24.317	0.9516	High	4.71
H_CD + FGFR + Lipid	75	107	IREIKEIRPGKTSRDFDRYQEDPAFRPDQSHCF	8.23	5	28	8.01	8.56	2.509	12.8	0.8833	High	8.02	8.56	2.651	13.525	0.8947	High	8.01	8.56	2.632	13.429	0.8921	High	8.02	8.56	4.697	23.966	0.873	Medium	8.01	8.56	4.462	22.766	0.8841	High	8.01	8.56	4.486	22.886	0.8967	High	8.01	8.56	5.559	28.364	0.8483	Medium	8.01
H_CD + FGFR + Lipid	78	89	IKEIRPGKTSRD	3.88	4	9	3.83	4.41	0.626	9.929	0.9192	High	3.83	4.41	0.665	10.556	0.9599	High	3.83	4.41	0.677	10.744	0.964	High	3.83	4.41	1.649	26.176	0.9594	High	3.83	4.41	1.535	24.365	0.9644	High	3.83	4.41	1.501	23.828	0.9615	High	3.83	4.41	2.148	34.095	0.9574	High	3.83
H_CD + FGFR + Lipid	78	90	IKEIRPGKTSRDF	5.82	4	10	5.65	6.08	0.578	8.264	0.8646	Medium	5.65	6.08	0.571	8.153	0.8954	Medium	5.65	6.08	0.565	8.075	0.9037	Medium	5.64	6.08	1.369	19.557	0.9009	Medium	5.65	6.08	1.269	18.128	0.8932	Medium	5.65	6.08	1.241	17.727	0.9114	Medium	5.65	6.08	2.175	31.066	0.8869	Medium	5.65
H_CD + FGFR + Lipid	78	106	IKEIRPGKTSRDFDRYQEDPAFRPDQSHC	7.17	4	24	7.02	7.4	2.849	16.96	0.8561	Medium	7.02	7.4	2.89	17.204	0.8312	Medium	7.02	7.4	2.912	17.335	0.8383	Medium	7.02	7.4	5.257	31.293	0.8423	Medium	7.02	7.4	4.967	29.567	0.8328	Medium	7.02	7.4	5.052	30.074	0.8507	Medium	7.02	7.4	6.155	36.634	0.8534	Medium	7.02
H_CD + FGFR + Lipid	90	106	FDRYQEDPAFRPDQSHC	7.75	3	13	7.68	8.16	2.531	27.815	0.9486	High	7.68	8.16	2.645	29.063	0.9425	High	7.68	8.15	2.61	28.681	0.9462	High	7.68	8.16	4.288	47.121	0.9433	High	7.68	8.16	4.15	45.601	0.9374	High	7.68	8.16	4.133	45.413	0.9298	High	7.68	8.16	4.474	49.166	0.9467	High	7.68
H_CD + FGFR + Lipid	94	107	QEDPAFRPDQSHCF	9.22	2	10	9.12	9.33	1.417	20.245	0.824	Medium	9.13	9.34	1.439	20.563	0.8365	Medium	9.12	9.33	1.477	21.097	0.833	Medium	9.13	9.34	2.228	31.832	0.8128	Medium	9.12	9.33	2.15	30.721	0.8166	Medium	9.12	9.33	2.324	33.207	0.7779	Medium	9.12	9.33	2.584	36.915	0.8177	Medium	9.12
H_CD + FGFR + Lipid	97	106	PAFRPDQSHC	6.15	2	7	6.16	6.24	1.687	34.433	0.8567	Medium	6.15	6.24	1.649	33.65	0.9048	High	6.16	6.24	1.673	34.136	0.8837	Medium	6.16	6.24	2.258	46.074	0.8904	Medium	6.16	6.24	2.108	43.019	0.9027	High	6.16	6.24	2.143	43.735	0.8486	Medium	6.16	6.24	2.563	52.298	0.8527	Medium	6.16
H_CD + FGFR + Lipid	111	115	YGMEF	12	1	3	11.83	11.9	0.148	7.034	0.7892	Medium	11.84	11.91	0.142	6.783	0.8746	Medium	11.84	11.9	0.156	7.411	0.834	Medium	11.84	11.9	0.489	23.307	0.7944	Medium	11.84	11.91	0.442	21.028	0.8752	Medium	11.84	11.9	0.434	20.669	0.7511	Medium	11.84	11.91	0.555	26.417	0.8091	Medium	11.83
H_CD + FGFR + Lipid	115	122	FRLKTLSL	10.23	2	6	10.21	10.56	0.035	0.822	0.9208	High	10.22	10.56	0.043	1.028	0.9202	High	10.21	10.56	0.032	0.767	0.9181	High	10.22	10.56	0.093	2.219	0.9298	High	10.21	10.56	0.086	2.052	0.9202	High	10.22	10.56	0.087	2.08	0.9264	High	10.21	10.56	0.441	10.498	0.9293	Medium	10.21
H_CD + FGFR + Lipid	116	122	RLKTLSL	8.5	2	5	8.35	8.75	0.023	0.666	0.9404	Medium	8.35	8.76	0.023	0.651	0.9426	Medium	8.35	8.75	0.034	0.97	0.9274	Medium	8.35	8.76	0.033	0.956	0.9531	Medium	8.35	8.75	0.024	0.69	0.9471	Medium	8.35	8.75	0.035	0.996	0.9379	Medium	8.35	8.75	0.089	2.549	0.9415	Medium	8.35
H_CD + FGFR + Lipid	123	128	QATSED	3.41	1	4	3.38	3.56	1.148	41.004	0.8715	Medium	3.38	3.57	1.164	41.585	0.8623	Medium	3.38	3.56	1.159	41.383	0.8943	Medium	3.38	3.56	1.664	59.429	0.8635	Medium	3.38	3.56	1.614	57.638	0.8811	Medium	3.38	3.56	1.629	58.196	0.8865	Medium	3.38	3.56	1.94	69.27	0.8601	Medium	3.38
H_CD + FGFR + Lipid	132	140	MWIKGLTWL	14.05	2	7	13.95	14.28	0.002	0.035	0.9464	High	13.96	14.28	0.009	0.179	0.928	High	13.95	14.28	0.001	0.029	0.9457	High	13.95	14.28	0.007	0.137	0.9485	High	13.95	14.28	0.013	0.26	0.9292	High	13.95	14.28	0.009	0.178	0.9398	High	13.95	14.28	0.034	0.691	0.9444	High	13.95
H_CD + FGFR + Lipid	133	140	WIKGLTWL	13.86	1	6	13.74	14.07	0.021	0.491	0.9269	High	13.75	14.07	0.013	0.305	0.9264	High	13.74	14.07	0.003	0.069	0.9253	High	13.74	14.07	0.024	0.574	0.9266	High	13.74	14.07	0.004	0.099	0.9266	High	13.74	14.07	0.007	0.168	0.9287	High	13.74	14.07	0.039	0.934	0.9259	High	13.74
H_CD + FGFR + Lipid	141	145	MEDTL	8.66	1	3	8.55	8.84	0.035	1.686	0.8915	Medium	8.56	8.84	0.019	0.884	0.8813	Medium	8.55	8.83	0.028	1.339	0.8854	Medium	8.55	8.84	0.041	1.955	0.8853	Medium	8.55	8.83	0.035	1.649	0.8817	Medium	8.55	8.84	0.051	2.414	0.8843	Medium	8.55	8.84	0.165	7.854	0.8839	Medium	8.55
H_CD + FGFR + Lipid	141	146	MEDTLQ	7.25	1	4	7.18	7.47	0.102	3.658	0.7547	Medium	7.18	7.46	0.087	3.105	0.7755	Medium	7.18	7.47	0.118	4.23	0.7651	Medium	7.18	7.46	0.104	3.702	0.7482	Medium	7.18	7.47	0.089	3.185	0.7662	Medium	7.18	7.47	0.096	3.441	0.8026	Medium	7.18	7.47	0.546	19.508	0.747	Medium	7.18
H_CD + FGFR + Lipid	141	156	MEDTLQAATPLQIERW	12.52	3	13	12.39	12.53	0.084	0.928	0.9291	High	12.39	12.54	0.1	1.101	0.9253	High	12.39	12.53	0.099	1.086	0.9232	High	12.39	12.53	0.498	5.477	0.9252	High	12.39	12.54	0.492	5.41	0.9344	High	12.39	12.53	0.51	5.61	0.9309	High	12.39	12.54	1.275	14.009	0.9347	High	12.39
H_CD + FGFR + Lipid	141	161	MEDTLQAATPLQIERWLRKQF	13.19	4	18	13.03	13.69	0.064	0.511	0.9381	High	13.04	13.69	0.077	0.612	0.932	High	13.04	13.69	0.072	0.571	0.9303	High	13.04	13.69	0.526	4.173	0.9339	High	13.04	13.69	0.508	4.031	0.923	High	13.04	13.69	0.501	3.979	0.9337	High	13.04	13.69	1.42	11.272	0.9354	High	13.04
H_CD + FGFR + Lipid	141	162	MEDTLQAATPLQIERWLRKQFY	13.4	4	19	13.4	13.61	0.073	0.549	0.936	High	13.41	13.62	0.103	0.778	0.9219	High	13.41	13.62	0.091	0.683	0.9397	High	13.41	13.62	0.529	3.977	0.9272	High	13.41	13.62	0.523	3.93	0.9329	High	13.41	13.62	0.535	4.023	0.9402	High	13.41	13.62	1.5	11.282	0.9334	High	13.41
H_CD + FGFR + Lipid	141	181	MEDTLQAATPLQIERWLRKQFYSVDRNREDRISAKDLKNML	12.24	5	38	12.24	12.56	1.066	4.007	0.9508	High	12.24	12.57	1.121	4.215	0.9425	High	12.24	12.57	1.112	4.179	0.9011	High	12.24	12.57	3.246	12.205	0.9313	High	12.24	12.57	3.097	11.642	0.9322	High	12.24	12.57	3.149	11.837	0.9413	High	12.24	12.57	5.758	21.646	0.9275	High	12.23
H_CD + FGFR + Lipid	143	161	DTLQAATPLQIERWLRKQF	13.2	4	16	13	13.46	0.089	0.791	0.9136	High	13.01	13.47	0.094	0.836	0.9025	High	13	13.47	0.098	0.872	0.9115	High	13	13.46	0.569	5.079	0.9102	High	13.01	13.47	0.566	5.051	0.9213	High	13	13.47	0.558	4.985	0.9079	High	13.01	13.47	1.445	12.902	0.9194	High	13.01
H_CD + FGFR + Lipid	146	161	QAATPLQIERWLRKQF	12.25	3	13	12.13	12.61	0.068	0.75	0.9287	High	12.14	12.62	0.082	0.904	0.9072	Medium	12.14	12.62	0.083	0.908	0.9138	High	12.14	12.62	0.392	4.313	0.9092	Medium	12.14	12.62	0.39	4.285	0.9001	Medium	12.14	12.62	0.409	4.494	0.9097	Medium	12.14	12.62	0.802	8.815	0.9164	High	12.13
H_CD + FGFR + Lipid	146	162	QAATPLQIERWLRKQFY	12.52	4	14	12.63	12.71	0.066	0.67	0.9531	High	12.64	12.71	0.069	0.702	0.952	High	12.63	12.71	0.079	0.803	0.958	High	12.63	12.71	0.406	4.148	0.9537	High	12.64	12.71	0.395	4.03	0.9439	High	12.63	12.71	0.418	4.264	0.9531	High	12.64	12.71	0.888	9.064	0.9479	High	12.64
H_CD + FGFR + Lipid	162	181	YSVDRNREDRISAKDLKNML	9.03	3	18	8.88	9.37	1.146	9.092	0.9421	High	8.88	9.38	1.225	9.721	0.9438	High	8.88	9.37	1.212	9.619	0.943	High	8.88	9.38	2.815	22.344	0.9265	High	8.88	9.37	2.662	21.128	0.9363	High	8.88	9.38	2.643	20.978	0.9352	High	8.88	9.37	3.955	31.39	0.9194	High	8.88
H_CD + FGFR + Lipid	162	184	YSVDRNREDRISAKDLKNMLSQV	10.24	4	21	10.19	10.28	1.041	7.082	0.9027	High	10.2	10.29	1.103	7.505	0.9306	High	10.19	10.28	1.093	7.437	0.9296	High	10.2	10.28	2.764	18.8	0.9077	High	10.19	10.28	2.591	17.627	0.9247	High	10.2	10.28	2.614	17.782	0.9036	High	10.19	10.28	4.905	33.367	0.9088	High	10.2
H_CD + FGFR + Lipid	182	193	SQVNYRVPNMRF	9.9	3	9	9.75	10.26	1.974	31.331	0.9104	High	9.76	10.27	1.995	31.673	0.9119	High	9.75	10.26	1.978	31.393	0.9107	High	9.76	10.27	3.136	49.774	0.9106	High	9.75	10.26	3.072	48.768	0.907	High	9.75	10.27	3.119	49.505	0.9096	High	9.75	10.26	4.103	65.131	0.9083	High	9.75
H_CD + FGFR + Lipid	185	193	NYRVPNMRF	9.68	3	6	9.53	10.09	1.9	45.247	0.9443	Medium	9.54	10.1	1.931	45.975	0.9421	Medium	9.53	10.09	1.926	45.848	0.9421	Medium	9.54	10.1	2.998	71.391	0.9256	Medium	9.53	10.09	2.926	69.662	0.9366	Medium	9.54	10.1	2.953	70.307	0.9354	Medium	9.53	10.09	3.337	79.461	0.9408	Medium	9.53
H_CD + FGFR + Lipid	186	193	YRVPNMRF	9.68	3	5	9.51	9.98	1.865	53.274	0.9475	High	9.52	9.98	1.912	54.633	0.9455	High	9.51	9.98	1.898	54.218	0.9495	High	9.52	9.98	2.905	82.992	0.9451	High	9.51	9.98	2.826	80.753	0.9447	High	9.52	9.98	2.84	81.153	0.9227	High	9.52	9.98	3.032	86.626	0.94	High	9.52
H_CD + FGFR + Lipid	192	201	RFLRERLTDL	8.9	3	8	8.93	9.01	1.301	23.238	0.9241	Medium	8.93	9.02	1.383	24.694	0.9293	Medium	8.93	9.01	1.366	24.396	0.9347	Medium	8.93	9.02	3.403	60.768	0.907	Medium	8.93	9.01	3.248	57.999	0.9116	Medium	8.93	9.01	3.3	58.933	0.9116	Medium	8.93	9.01	3.545	63.305	0.8969	Medium	8.93
H_CD + FGFR + Lipid	194	201	LRERLTDL	8.31	2	6	8.21	8.73	1.19	28.324	0.8145	Medium	8.21	8.73	1.286	30.611	0.8254	Medium	8.2	8.72	1.236	29.431	0.8181	Medium	8.21	8.73	2.781	66.214	0.816	Medium	8.21	8.73	2.69	64.041	0.8195	Medium	8.21	8.73	2.734	65.087	0.8079	Medium	8.21	8.73	2.815	67.029	0.8147	Medium	8.21
H_CD + FGFR + Lipid	202	213	EQRSGDITYGQF	9.68	2	10	9.54	10.07	1.153	16.468	0.8911	High	9.55	10.08	1.199	17.125	0.8936	High	9.54	10.07	1.166	16.662	0.8925	High	9.55	10.07	1.898	27.119	0.8992	High	9.54	10.07	1.839	26.277	0.8939	High	9.54	10.07	1.819	25.986	0.8868	High	9.54	10.07	2.969	42.408	0.8831	High	9.54
H_CD + FGFR + Lipid	217	221	YRSLM	8.39	1	3	8.36	8.65	0.033	1.555	0.8404	Medium	8.36	8.66	0.032	1.535	0.8527	Medium	8.36	8.65	0.04	1.892	0.8496	Medium	8.36	8.66	0.033	1.559	0.8588	Medium	8.36	8.65	0.024	1.157	0.8552	Medium	8.36	8.65	0.03	1.434	0.8493	Medium	8.36	8.65	0.07	3.357	0.8467	Medium	8.36
H_CD + FGFR + Lipid	221	235	MYSAQKTMDLPFLET	12.73	2	12	12.79	12.87	1.329	15.822	0.8316	Medium	12.8	12.87	1.374	16.361	0.8089	Medium	12.79	12.87	1.402	16.693	0.8294	Medium	12.79	12.87	3.017	35.917	0.8329	Medium	12.8	12.87	2.966	35.31	0.801	Medium	12.79	12.87	2.975	35.412	0.837	Medium	12.8	12.87	4.749	56.54	0.8157	Medium	12.8
H_CD + FGFR + Lipid	222	233	YSAQKTMDLPFL	13.14	2	9	12.88	13.49	0.626	9.942	0.9354	High	12.89	13.5	0.702	11.138	0.9114	High	12.89	13.5	0.66	10.474	0.9381	High	12.89	13.5	1.834	29.108	0.9356	High	12.89	13.5	1.774	28.163	0.9153	High	12.89	13.5	1.759	27.92	0.929	High	12.89	13.5	3.389	53.794	0.9233	High	12.89
H_CD + FGFR + Lipid	222	235	YSAQKTMDLPFLET	12.47	2	11	11.93	13.01	1.33	17.269	0.9006	High	11.94	13.01	1.393	18.097	0.9016	High	11.94	13.01	1.355	17.596	0.887	High	11.94	13.01	2.967	38.528	0.9109	High	11.94	13.01	2.885	37.472	0.901	High	11.94	13.01	2.881	37.417	0.8981	High	11.94	13.01	4.504	58.49	0.8934	High	11.93
H_CD + FGFR + Lipid	236	246	NTLRTGERPEL	7.21	3	8	7.04	7.55	3.391	60.554	0.9407	High	7.04	7.56	3.44	61.428	0.932	High	7.04	7.55	3.424	61.144	0.9268	High	7.04	7.55	4.487	80.121	0.9283	Medium	7.04	7.55	4.321	77.165	0.9336	Medium	7.04	7.55	4.341	77.522	0.9261	Medium	7.04	7.55	4.343	77.547	0.9137	High	7.04
H_CD + FGFR + Lipid	247	251	CQVSL	9.14	1	3	8.91	9.06	0.053	2.512	0.7402	Medium	8.92	9.07	0.065	3.109	0.7547	Medium	8.91	9.06	0.054	2.586	0.7594	Medium	8.92	9.07	0.061	2.924	0.7647	Medium	8.91	9.06	0.075	3.588	0.7584	Medium	8.91	9.06	0.043	2.065	0.7533	Medium	8.91	9.06	0.118	5.638	0.7327	Medium	8.91
H_CD + FGFR + Lipid	247	253	CQVSLSE	7.8	1	5	7.62	7.9	0.244	6.985	0.8917	Medium	7.62	7.9	0.238	6.789	0.9032	Medium	7.62	7.89	0.302	8.621	0.8575	Medium	7.61	7.9	0.689	19.677	0.8794	Medium	7.62	7.9	0.672	19.19	0.9018	Medium	7.62	7.9	0.676	19.308	0.8972	Medium	7.62	7.9	1.017	29.047	0.8805	Medium	7.62
H_CD + FGFR + Lipid	249	254	VSLSEF	11.41	1	4	11.24	11.53	0.195	6.976	0.8183	Medium	11.25	11.54	0.209	7.459	0.8399	Medium	11.25	11.54	0.215	7.688	0.8216	Medium	11.25	11.53	0.583	20.83	0.8449	Medium	11.25	11.54	0.554	19.772	0.8319	Medium	11.25	11.53	0.547	19.548	0.8317	Medium	11.24	11.53	0.831	29.668	0.8423	Medium	11.24
H_CD + FGFR + Lipid	254	258	FQQFL	11.89	1	3	11.76	12.05	0.028	1.353	0.8629	Medium	11.76	12.06	0.016	0.749	0.8468	Medium	11.76	12.06	0.03	1.417	0.8587	Medium	11.76	12.05	0.01	0.482	0.8824	Medium	11.76	12.06	0.014	0.67	0.8684	Medium	11.76	12.05	0.027	1.278	0.8828	Medium	11.76	12.06	0.009	0.417	0.8857	Medium	11.76
H_CD + FGFR + Lipid	259	265	LEYQGEL	9.84	1	5	9.7	10.09	0.147	4.209	0.9291	High	9.7	10.09	0.159	4.537	0.9247	High	9.7	10.08	0.154	4.398	0.9261	High	9.7	10.09	0.656	18.753	0.9289	High	9.7	10.09	0.643	18.362	0.8527	Medium	9.7	10.09	0.635	18.13	0.9359	High	9.7	10.09	1.149	32.817	0.9234	High	9.7
H_CD + FGFR + Lipid	266	271	WAVDRL	10.39	1	4	10.23	10.55	0.589	21.034	0.8772	Medium	10.24	10.55	0.615	21.977	0.868	Medium	10.23	10.55	0.614	21.911	0.8658	Medium	10.23	10.55	1.13	40.352	0.8691	Medium	10.23	10.55	1.151	41.108	0.8658	Medium	10.23	10.55	1.142	40.793	0.8488	Medium	10.23	10.55	1.293	46.187	0.8559	Medium	10.23
H_CD + FGFR + Lipid	276	280	FMLSF	14.12	1	3	13.94	14.31	0.024	1.146	0.892	High	13.95	14.32	0.013	0.641	0.8951	High	13.94	14.31	0.026	1.24	0.8878	High	13.94	14.31	0.022	1.057	0.8984	High	13.94	14.31	0.016	0.779	0.8947	High	13.94	14.31	0.016	0.742	0.8917	High	13.95	14.31	0.073	3.477	0.8914	High	13.95
H_CD + FGFR + Lipid	281	287	LRDPLRE	7.17	1	4	6.95	7.27	0.052	1.868	0.9251	High	6.94	7.27	0.066	2.341	0.9283	Medium	6.95	7.27	0.085	3.027	0.9121	High	6.94	7.26	0.434	15.506	0.925	Medium	6.95	7.27	0.417	14.908	0.9082	Medium	6.95	7.27	0.41	14.66	0.9222	High	6.95	7.27	1.294	46.23	0.93	Medium	6.95
H_CD + FGFR + Lipid	281	293	LRDPLREIEEPYF	11.83	3	9	11.66	12.24	0.532	8.444	0.9225	High	11.66	12.25	0.553	8.78	0.9277	Medium	11.66	12.25	0.57	9.055	0.9213	High	11.66	12.25	1.639	26.018	0.9086	Medium	11.66	12.25	1.57	24.925	0.8979	Medium	11.66	12.25	1.602	25.435	0.8957	Medium	11.66	12.25	2.556	40.575	0.9093	Medium	11.66
H_CD + FGFR + Lipid	288	293	IEEPYF	11.78	1	3	11.79	11.87	0.201	9.585	0.8937	Medium	11.8	11.87	0.196	9.311	0.8864	Medium	11.8	11.87	0.207	9.856	0.8811	Medium	11.79	11.87	0.391	18.623	0.8776	Medium	11.8	11.87	0.341	16.238	0.885	Medium	11.79	11.87	0.362	17.259	0.8928	Medium	11.8	11.87	0.388	18.485	0.8842	Medium	11.79
H_CD + FGFR + Lipid	294	298	FLDEL	11.89	1	3	11.72	12.02	0.01	0.489	0.8719	Medium	11.72	12.02	0.017	0.83	0.8782	Medium	11.72	12.02	0.022	1.037	0.8716	Medium	11.72	12.02	0.051	2.448	0.8768	Medium	11.72	12.02	0.038	1.826	0.8745	Medium	11.72	12.02	0.049	2.331	0.8702	Medium	11.72	12.02	0.133	6.35	0.8769	Medium	11.71
H_CD + FGFR + Lipid	298	302	LVTFL	13.19	1	3	12.97	13.47	0.01	0.489	0.9195	High	12.97	13.48	0.011	0.519	0.9168	High	12.97	13.47	0.007	0.334	0.9216	High	12.97	13.47	0.012	0.594	0.9193	High	12.97	13.48	0.008	0.375	0.9175	High	12.97	13.47	0.005	0.23	0.9222	High	12.97	13.48	0.002	0.099	0.9182	High	12.97
H_CD + FGFR + Lipid	303	310	FSKENSVW	9.79	2	6	9.66	9.86	0.059	1.395	0.8669	Medium	9.66	9.87	0.065	1.552	0.8849	Medium	9.66	9.86	0.069	1.647	0.8734	Medium	9.66	9.86	0.08	1.914	0.8593	Medium	9.66	9.86	0.073	1.737	0.8847	Medium	9.66	9.86	0.074	1.755	0.8515	Medium	9.66	9.86	0.136	3.235	0.8162	Medium	9.66
H_CD + FGFR + Lipid	303	314	FSKENSVWNSQL	10.56	2	10	10.33	10.82	0.115	1.649	0.8497	Medium	10.34	10.82	0.121	1.722	0.8522	High	10.33	10.82	0.134	1.919	0.8465	Medium	10.33	10.82	0.812	11.607	0.8585	High	10.33	10.82	0.778	11.121	0.8546	High	10.33	10.82	0.8	11.431	0.8371	Medium	10.33	10.82	1.969	28.124	0.8475	Medium	10.33
H_CD + FGFR + Lipid	315	329	DAVCPETMNNPLSHY	10.56	2	11	10.06	11.04	0.691	8.973	0.7751	Medium	10.07	11.05	0.728	9.448	0.7667	Medium	10.06	11.05	0.726	9.427	0.7648	Medium	10.07	11.05	1.668	21.661	0.7224	Medium	10.06	11.04	1.649	21.417	0.7157	Medium	10.06	11.05	1.66	21.558	0.7227	Medium	10.06	11.04	2.571	33.394	0.6998	Medium	10.06
H_CD + FGFR + Lipid	319	329	PETMNNPLSHY	9.73	2	8	9.25	9.96	0.071	1.261	0.9111	High	9.26	9.97	0.071	1.271	0.9046	High	9.25	9.96	0.076	1.359	0.9067	High	9.26	9.96	0.225	4.024	0.917	High	9.25	9.96	0.227	4.053	0.912	High	9.26	9.96	0.221	3.954	0.9149	High	9.25	9.96	0.868	15.492	0.9165	High	9.26
H_CD + FGFR + Lipid	330	337	WISSSANT	7.66	1	6	7.53	8.04	0.084	1.999	0.9009	High	7.54	8.04	0.09	2.145	0.906	High	7.53	8.04	0.082	1.958	0.8996	High	7.53	8.04	0.11	2.622	0.8955	High	7.53	8.04	0.11	2.608	0.8975	High	7.54	8.04	0.119	2.827	0.908	High	7.53	8.04	0.373	8.891	0.9047	High	7.53
H_CD + FGFR + Lipid	330	339	WISSSANTYL	11.57	1	8	11.61	11.85	0.162	2.891	0.9071	Medium	11.61	11.86	0.137	2.443	0.9017	Medium	11.61	11.85	0.189	3.374	0.9049	Medium	11.61	11.85	0.179	3.193	0.8736	Medium	11.61	11.86	0.216	3.861	0.8702	Medium	11.61	11.85	0.204	3.649	0.8664	Medium	11.61	11.86	0.611	10.914	0.8994	Medium	11.61
H_CD + FGFR + Lipid	344	350	FSSESSL	8.36	1	5	8.34	8.45	0.573	16.379	0.8845	Medium	8.35	8.45	0.54	15.436	0.8825	Medium	8.34	8.45	0.586	16.733	0.8864	Medium	8.34	8.45	1.717	49.045	0.873	Medium	8.34	8.45	1.638	46.807	0.8957	Medium	8.34	8.45	1.638	46.791	0.859	Medium	8.34	8.45	2.255	64.419	0.8755	Medium	8.34
H_CD + FGFR + Lipid	345	350	SSESSL	6.35	1	4	6.27	6.35	0.42	14.985	0.8973	High	6.26	6.35	0.425	15.188	0.8961	High	6.27	6.35	0.427	15.234	0.8973	High	6.26	6.35	1.536	54.842	0.8999	High	6.27	6.35	1.464	52.297	0.8978	High	6.27	6.35	1.488	53.141	0.8799	Medium	6.27	6.35	2.093	74.746	0.9067	High	6.27
H_CD + FGFR + Lipid	345	352	SSESSLEA	6.53	1	6	6.59	6.7	0.609	14.496	0.8568	Medium	6.6	6.7	0.657	15.638	0.8179	Medium	6.59	6.69	0.63	14.992	0.8329	Medium	6.59	6.69	2.026	48.232	0.7814	Medium	6.59	6.7	1.913	45.547	0.7805	Medium	6.6	6.7	1.981	47.163	0.8546	Medium	6.59	6.7	2.57	61.191	0.8323	Medium	6.59
H_CD + FGFR + Lipid	357	363	LRMGCRC	6.3	2	5	6.12	6.44	0.044	1.265	0.9236	Medium	6.11	6.43	0.041	1.16	0.925	Medium	6.12	6.43	0.036	1.028	0.9173	Medium	6.11	6.43	0.071	2.037	0.9135	Medium	6.12	6.44	0.046	1.323	0.9249	Medium	6.12	6.44	0.037	1.068	0.9253	Medium	6.12	6.43	0.047	1.337	0.9227	Medium	6.12
H_CD + FGFR + Lipid	367	375	DCWDGPDGM	11.64	1	6	11.51	11.69	0.492	11.712	0.8877	Medium	11.52	11.7	0.522	12.421	0.857	Medium	11.52	11.7	0.467	11.12	0.8834	Medium	11.52	11.69	0.651	15.491	0.8803	Medium	11.52	11.7	0.628	14.952	0.878	Medium	11.52	11.69	0.669	15.931	0.8139	Medium	11.51	11.7	0.968	23.048	0.8821	Medium	11.51
H_CD + FGFR + Lipid	367	386	DCWDGPDGMPVIYHGHTLTT	10.88	3	16	10.69	11.43	1.04	9.282	0.9114	High	10.7	11.44	1.048	9.36	0.9163	High	10.7	11.44	1.093	9.755	0.9079	High	10.69	11.43	2.209	19.723	0.9231	High	10.69	11.44	2.142	19.128	0.912	High	10.69	11.43	2.192	19.573	0.916	High	10.69	11.43	2.776	24.783	0.9172	High	10.69
H_CD + FGFR + Lipid	367	394	DCWDGPDGMPVIYHGHTLTTKIKFSDVL	11.61	4	24	11.6	11.69	1.183	7.044	0.9238	High	11.6	11.7	1.195	7.114	0.8874	High	11.6	11.7	1.228	7.308	0.9117	High	11.6	11.69	2.655	15.801	0.9046	High	11.6	11.7	2.547	15.16	0.8918	High	11.6	11.69	2.694	16.035	0.9063	High	11.6	11.7	3.884	23.117	0.8925	High	11.6
H_CD + FGFR + Lipid	367	396	DCWDGPDGMPVIYHGHTLTTKIKFSDVLHT	10.9	5	26	10.82	11.17	1.114	6.123	0.8923	High	10.82	11.18	1.116	6.132	0.8876	Medium	10.82	11.17	1.139	6.261	0.8812	High	10.82	11.17	2.564	14.085	0.8705	Medium	10.82	11.17	2.408	13.229	0.8739	Medium	10.82	11.17	2.525	13.875	0.8991	High	10.82	11.17	3.731	20.499	0.8536	High	10.82
H_CD + FGFR + Lipid	376	386	PVIYHGHTLTT	7.16	3	9	7.21	7.36	0.767	12.181	0.8369	Medium	7.21	7.36	0.74	11.749	0.8216	Medium	7.21	7.36	0.786	12.473	0.8398	Medium	7.2	7.35	1.979	31.407	0.8143	Medium	7.21	7.36	1.845	29.291	0.8233	Medium	7.21	7.36	1.946	30.883	0.8328	Medium	7.21	7.36	2.118	33.618	0.8512	Medium	7.21
H_CD + FGFR + Lipid	387	394	KIKFSDVL	9.87	1	6	9.76	10.07	0.356	8.485	0.9302	High	9.76	10.08	0.346	8.239	0.9314	High	9.76	10.07	0.344	8.194	0.9107	High	9.76	10.07	0.71	16.915	0.9253	High	9.76	10.07	0.666	15.852	0.9289	High	9.76	10.07	0.673	16.023	0.9266	High	9.76	10.07	1.111	26.461	0.9291	Medium	9.76
H_CD + FGFR + Lipid	387	399	KIKFSDVLHTIKE	9.3	3	11	9.2	9.3	0.239	3.105	0.8558	Medium	9.2	9.3	0.25	3.242	0.8677	Medium	9.19	9.3	0.25	3.246	0.8772	Medium	9.2	9.3	0.484	6.285	0.7808	Medium	9.2	9.3	0.473	6.149	0.8263	Medium	9.2	9.3	0.506	6.572	0.8169	Medium	9.2	9.3	0.874	11.356	0.8271	Medium	9.2
H_CD + FGFR + Lipid	391	399	SDVLHTIKE	7.38	3	7	7.24	7.33	0.076	1.555	0.8817	High	7.24	7.34	0.055	1.125	0.9198	High	7.24	7.33	0.142	2.907	0.8112	Medium	7.24	7.33	0.071	1.451	0.9091	High	7.24	7.33	0.065	1.327	0.9105	High	7.24	7.33	0.079	1.606	0.9064	High	7.24	7.33	0.143	2.914	0.8466	Medium	7.24
H_CD + FGFR + Lipid	391	401	SDVLHTIKEHA	7.91	3	9	7.85	8.25	0.114	1.806	0.8621	Medium	7.86	8.25	0.171	2.716	0.8574	Medium	7.85	8.25	0.132	2.095	0.861	Medium	7.86	8.25	0.126	1.993	0.8302	Medium	7.85	8.25	0.175	2.783	0.8562	Medium	7.86	8.25	0.13	2.056	0.8615	Medium	7.85	8.25	0.221	3.503	0.8492	Medium	7.85
H_CD + FGFR + Lipid	400	407	HAFVASEY	8.18	1	6	8.04	8.4	0.152	3.627	0.884	Medium	8.04	8.4	0.189	4.509	0.861	Medium	8.04	8.4	0.173	4.126	0.8857	Medium	8.04	8.4	0.753	17.94	0.8519	Medium	8.04	8.4	0.761	18.109	0.833	Medium	8.04	8.4	0.721	17.175	0.8538	Medium	8.04	8.4	1.694	40.336	0.8306	Medium	8.04
[truncated: 685 more rows]
[truncated: 47 more columns]

## Sheet: %D Figure (Fig 1)
	PLC-γ1(CD)					Apo (Refers to Fig 1)											+ FGFR1K											+ Liposome											+ FGFR1K + Liposome
[truncated: 266 more rows]

## Sheet: Differences (Fig 2-4, S5, S6)
			(CD_D1165H) v (CD) - Refers to Fig 3																																					(CD + FGFR1K) v (CD) - Refers to Fig 2A
[truncated: 257 more rows]

[truncated: 2 more sheets: WT PLC vs D1165H, raw data- expt 2 (WT vs D1165H)]
