# Supplementary figures and images for: Dynamics of allosteric regulation of the phospholipase C-γ isozymes upon recruitment to membranes
Source: eLife journal article supplement (doi:10.7554/elife.77809), 2022-05-23

Figure 2-figure supplement 1-source data 1

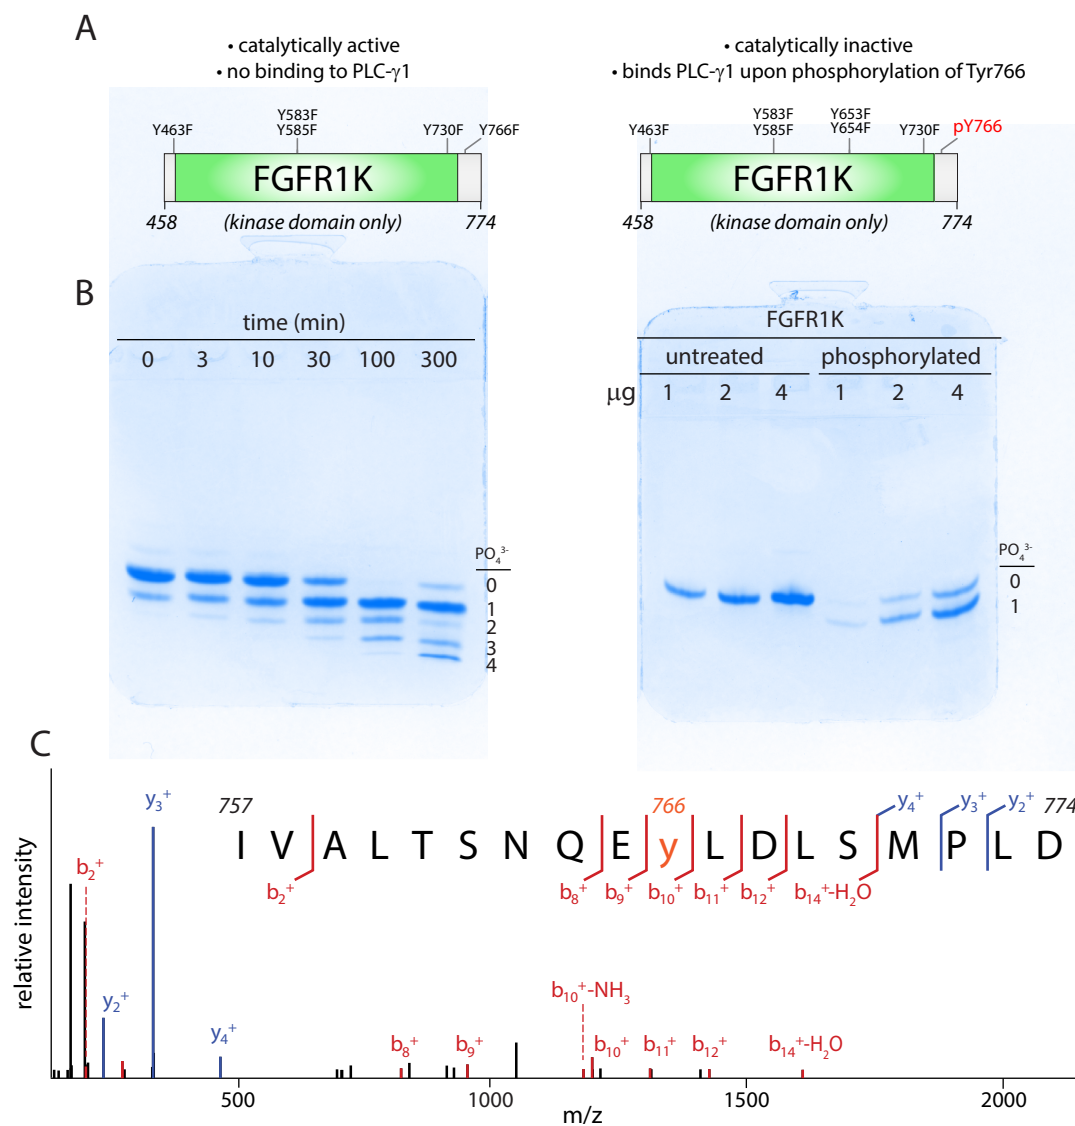

Supplement: fig1-data2 [file elife-77809-fig1-data2-v1.zip]

Figure 1-figure supplement 1-source data 1

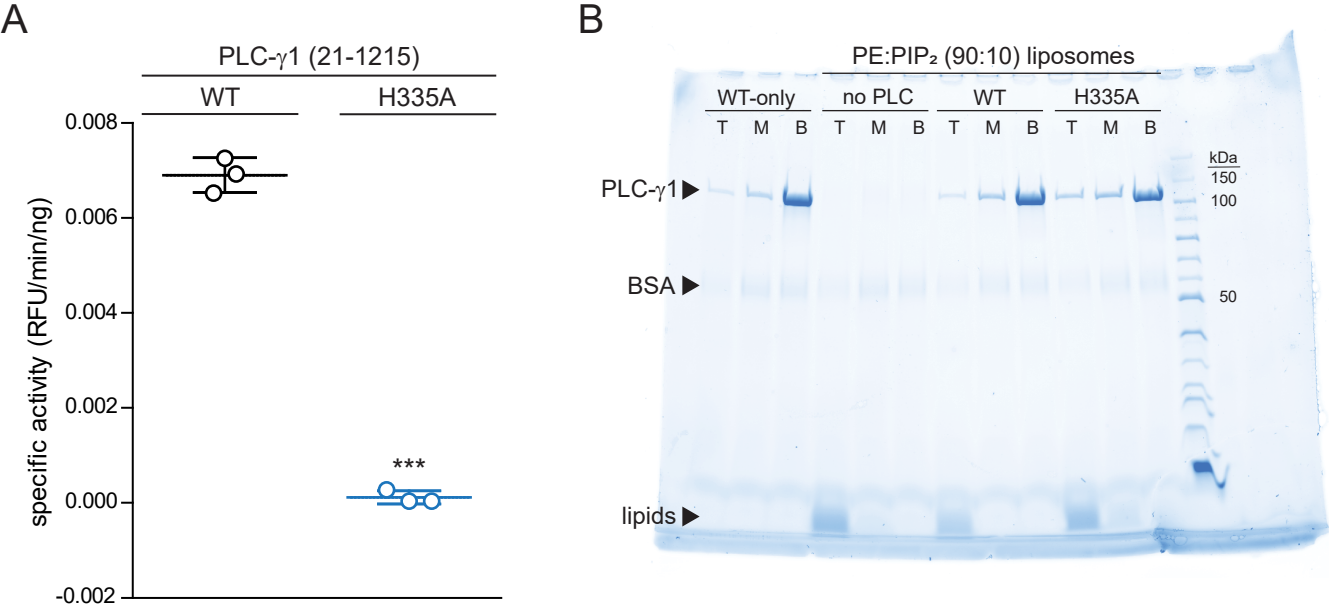

Supplement: fig1-data2 [file elife-77809-fig1-data2-v1.zip]

Figure 2-figure supplement 2-source data 1

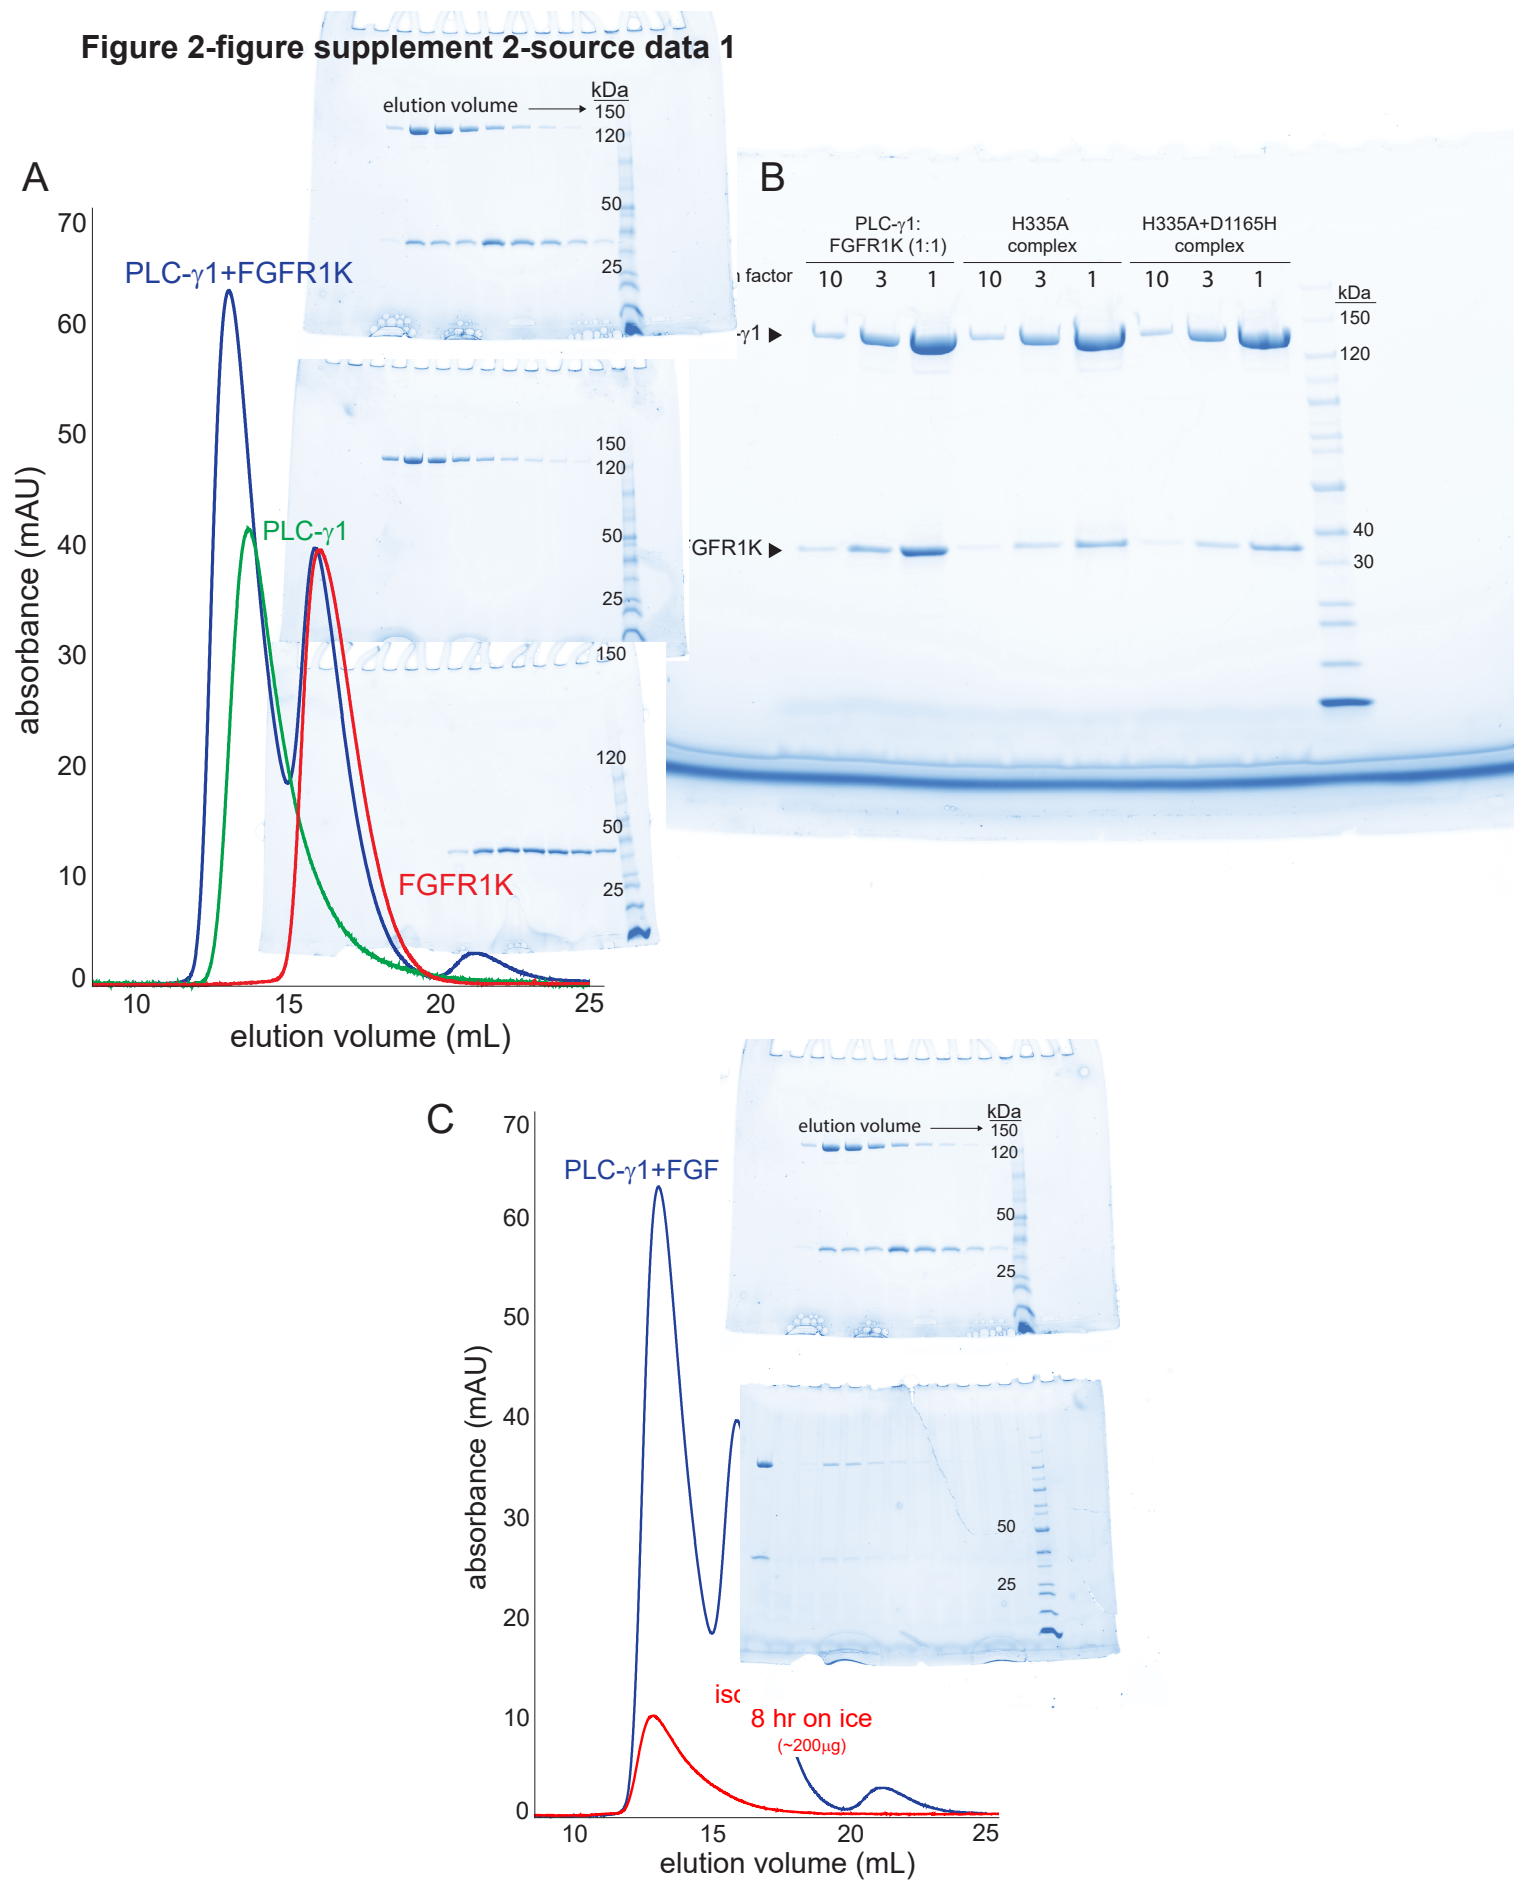

Supplement: fig1-data2 [file elife-77809-fig1-data2-v1.zip]
